# Supplementary material
Source: publisher figshare collection journal article supplement (https://acs.figshare.com/ndownloader/files/34281479)
Supplement: Supplementary file 1 [file 34281479]

## Sheet: Description
Supplementary Tables
Table S1. Orbitrap MS2 acquisition parameters
Table S2. List of MS2 scans and reporter ion intensities from 1 µg of phosphopeptide labeled with TMT11-126 (Fig. S1)
Table S3. List of MS2 scans and reporter ion intensities from 1 µg of phosphopeptide labeled with TMT11-131C (Fig. S1)
Table S4. List of PSMs identified from MS2 acquisition test (Fig. S3)
Table S5. List of PSMs identified from carrier-to-sample ratio optimization test (Fig. S4)
Table S6. List of quantifiable peptides in phosphocarrier feasibility test in Fig. 2.
Table S7. List of quantified peptide from 8-plex of 1,000 cells and phosphocarrier experiment (Fig. S6).
Table S8. List of quantified phosphopeptide from the experiment comparing standard method and phosphocarrier method (Fig. 3).
Table S9. List of PSMs matched to human phosphopeptide in two-proteome model experiment (Fig. 4)
Table S10. List of quantified phosphopeptide from the cytokine and insulin treatment test (Fig. 5).

## Sheet: Table_S1
Figure #	Experiment	Injection time (ms)	AGC
2	A	120	50000
	B	120	50000
	C	120	50000
	D	300	5000000
3	Standard	120	50000
	Carrier	300	5000000
4	-	300	5000000
5	Set A	300	5000000
	Set B	300	5000000
S1	A	120	50000
	B	120	50000
S3	Default	120	50000
	Max	300	5000000
S4	Exp1-7	300	5000000
S5	-	300	5000000

## Sheet: Table_S2
Dataset	ScanNumber	Collision Mode	ParentIonMZ	BasePeakIntensity	BasePeakMZ	ReporterIonIntensityMax	Ion_126.128	Ion_127.125	Ion_127.131	Ion_128.128	Ion_128.134	Ion_129.131	Ion_129.138	Ion_130.135	Ion_130.141	Ion_131.138	Ion_131.144	Weighted Avg Pct Intensity Correction	Ion_126.128_SignalToNoise	Ion_127.125_SignalToNoise	Ion_127.131_SignalToNoise	Ion_128.128_SignalToNoise	Ion_128.134_SignalToNoise	Ion_129.131_SignalToNoise	Ion_129.138_SignalToNoise	Ion_130.135_SignalToNoise	Ion_130.141_SignalToNoise	Ion_131.138_SignalToNoise	Ion_131.144_SignalToNoise	Ion_126.128_Resolution	Ion_127.125_Resolution	Ion_127.131_Resolution	Ion_128.128_Resolution	Ion_128.134_Resolution	Ion_129.131_Resolution	Ion_129.138_Resolution	Ion_130.135_Resolution	Ion_130.141_Resolution	Ion_131.138_Resolution	Ion_131.144_Resolution
0	70	hcd	341.34	1578.1	285.01	0	0	0	0	0	0	0	0	0	0	0	0	0
0	126	hcd	339.36	1311.37	299.061	0	0	0	0	0	0	0	0	0	0	0	0	0
0	127	hcd	321.21	35642.9	149.023	0	0	0	0	0	0	0	0	0	0	0	0	0
0	172	hcd	397.91	82065.3	374.896	0	0	0	0	0	0	0	0	0	0	0	0	0
0	173	hcd	681.23	6886.82	225.043	0	0	0	0	0	0	0	0	0	0	0	0	0
0	231	hcd	352.44	9714.55	352.238	0	0	0	0	0	0	0	0	0	0	0	0	0
0	274	hcd	437.23	5157.5	437.234	0	0	0	0	0	0	0	0	0	0	0	0	0
0	360	hcd	473.96	4864.57	464.956	0	0	0	0	0	0	0	0	0	0	0	0	0
0	367	hcd	683.74	46171.5	502.803	0	0	0	0	0	0	0	0	0	0	0	0	0
0	400	hcd	681.74	6266.42	500.802	0	0	0	0	0	0	0	0	0	0	0	0	0
0	406	hcd	723.94	37297.1	464.956	0	0	0	0	0	0	0	0	0	0	0	0	0
0	418	hcd	308.9	133615	250.778	0	0	0	0	0	0	0	0	0	0	0	0	0
0	439	hcd	607.21	21795	239.095	0	0	0	0	0	0	0	0	0	0	0	0	0
0	479	hcd	439.84	17336	439.843	0	0	0	0	0	0	0	0	0	0	0	0	0
0	482	hcd	817.21	1826.24	299.063	0	0	0	0	0	0	0	0	0	0	0	0	0
0	486	hcd	476.2	8220.8	225.043	0	0	0	0	0	0	0	0	0	0	0	0	0
0	502	hcd	631.74	4473.18	500.802	0	0	0	0	0	0	0	0	0	0	0	0	0
0	515	hcd	352.44	7593.87	352.238	380.52	0	0	0	380.52	0	0	0	0	0	0	0	0
0	524	hcd	637.87	1228.75	372.168	0	0	0	0	0	0	0	0	0	0	0	0	0
0	536	hcd	341.34	7457.28	214.817	0	0	0	0	0	0	0	0	0	0	0	0	0
0	558	hcd	465.14	14613.1	362.025	0	0	0	0	0	0	0	0	0	0	0	0	0
0	575	hcd	397.91	76765	374.895	0	0	0	0	0	0	0	0	0	0	0	0	0
0	576	hcd	435.77	1608.66	389.028	0	0	0	0	0	0	0	0	0	0	0	0	0
0	577	hcd	552.33	1438.8	239.095	0	0	0	0	0	0	0	0	0	0	0	0	0
0	593	hcd	308.83	131109	250.778	0	0	0	0	0	0	0	0	0	0	0	0	0
0	619	hcd	321.21	28331.5	149.023	0	0	0	0	0	0	0	0	0	0	0	0	0
0	652	hcd	308.9	68915.4	250.778	0	0	0	0	0	0	0	0	0	0	0	0	0
0	680	hcd	335.22	76154.8	252.777	0	0	0	0	0	0	0	0	0	0	0	0	0
0	720	hcd	439.84	16416.3	439.844	0	0	0	0	0	0	0	0	0	0	0	0	0
0	731	hcd	758.22	2119.64	299.062	0	0	0	0	0	0	0	0	0	0	0	0	0
0	745	hcd	624.24	5815.27	239.095	0	0	0	0	0	0	0	0	0	0	0	0	0
0	762	hcd	546.83	24762.8	500.803	0	0	0	0	0	0	0	0	0	0	0	0	0
0	792	hcd	681.23	6208.48	239.095	0	0	0	0	0	0	0	0	0	0	0	0	0
0	805	hcd	397.91	20448.2	365.895	0	0	0	0	0	0	0	0	0	0	0	0	0
0	816	hcd	403.23	11678.2	185.081	0	0	0	0	0	0	0	0	0	0	0	0	0
0	817	hcd	352.44	6318.89	352.238	0	0	0	0	0	0	0	0	0	0	0	0	0
0	832	hcd	432.89	4503.68	346.973	0	0	0	0	0	0	0	0	0	0	0	0	0
0	838	hcd	402.18	11951.4	239.094	0	0	0	0	0	0	0	0	0	0	0	0	0
0	849	hcd	434.88	1114.51	210.95	0	0	0	0	0	0	0	0	0	0	0	0	0
0	893	hcd	341.34	1634.76	323.872	0	0	0	0	0	0	0	0	0	0	0	0	0
0	903	hcd	815.21	5266.47	299.061	0	0	0	0	0	0	0	0	0	0	0	0	0
0	951	hcd	439.84	17982.3	439.844	0	0	0	0	0	0	0	0	0	0	0	0	0
0	1003	hcd	337.2	5528.88	308.9	0	0	0	0	0	0	0	0	0	0	0	0	0
0	1066	hcd	681.23	6259.62	239.095	0	0	0	0	0	0	0	0	0	0	0	0	0
0	1083	hcd	352.44	9401.16	352.238	0	0	0	0	0	0	0	0	0	0	0	0	0
0	1131	hcd	743.19	5603.92	299.062	0	0	0	0	0	0	0	0	0	0	0	0	0
0	1171	hcd	341.05	3104.69	322.888	0	0	0	0	0	0	0	0	0	0	0	0	0
0	1186	hcd	624.24	5223.22	239.095	0	0	0	0	0	0	0	0	0	0	0	0	0
0	1200	hcd	439.84	16920	439.844	0	0	0	0	0	0	0	0	0	0	0	0	0
0	1242	hcd	341.34	1734.82	229.008	0	0	0	0	0	0	0	0	0	0	0	0	0
0	1251	hcd	671.17	1352.61	672.795	0	0	0	0	0	0	0	0	0	0	0	0	0
0	1351	hcd	817.21	1588.66	285.01	0	0	0	0	0	0	0	0	0	0	0	0	0
0	1416	hcd	624.24	5929.01	239.094	0	0	0	0	0	0	0	0	0	0	0	0	0
0	1437	hcd	439.84	14626.4	439.842	0	0	0	0	0	0	0	0	0	0	0	0	0
0	1461	hcd	413.27	5996	413.266	0	0	0	0	0	0	0	0	0	0	0	0	0
0	1468	hcd	743.2	5011.06	299.062	0	0	0	0	0	0	0	0	0	0	0	0	0
0	1469	hcd	684.2	9193.12	359.028	0	0	0	0	0	0	0	0	0	0	0	0	0
0	1475	hcd	352.44	7207.58	352.238	0	0	0	0	0	0	0	0	0	0	0	0	0
0	1582	hcd	681.23	5370.39	299.062	0	0	0	0	0	0	0	0	0	0	0	0	0
0	1646	hcd	441.3	4823.16	440.844	0	0	0	0	0	0	0	0	0	0	0	0	0
0	1660	hcd	624.24	5112.87	239.095	0	0	0	0	0	0	0	0	0	0	0	0	0
0	1671	hcd	439.84	15442.1	439.843	0	0	0	0	0	0	0	0	0	0	0	0	0
0	1705	hcd	321.21	28974.1	149.023	0	0	0	0	0	0	0	0	0	0	0	0	0
0	1776	hcd	335.22	31221	223.064	0	0	0	0	0	0	0	0	0	0	0	0	0
0	1792	hcd	308.9	96466.3	308.899	0	0	0	0	0	0	0	0	0	0	0	0	0
0	1797	hcd	421.32	3841.16	149.023	0	0	0	0	0	0	0	0	0	0	0	0	0
0	1806	hcd	579.1	4246.77	167.055	0	0	0	0	0	0	0	0	0	0	0	0	0
0	1835	hcd	684.2	6099.16	359.028	0	0	0	0	0	0	0	0	0	0	0	0	0
0	1858	hcd	681.23	7234.1	239.095	0	0	0	0	0	0	0	0	0	0	0	0	0
0	1865	hcd	337.2	11434.2	313.858	0	0	0	0	0	0	0	0	0	0	0	0	0
0	1898	hcd	624.24	5905.88	239.094	0	0	0	0	0	0	0	0	0	0	0	0	0
0	1969	hcd	495.83	49616.8	495.833	0	0	0	0	0	0	0	0	0	0	0	0	0
0	1997	hcd	439.84	67186.1	439.843	0	0	0	0	0	0	0	0	0	0	0	0	0
0	2008	hcd	335.22	30513	223.063	0	0	0	0	0	0	0	0	0	0	0	0	0
0	2069	hcd	421.83	3260.58	439.842	0	0	0	0	0	0	0	0	0	0	0	0	0
0	2089	hcd	743.19	4547.26	299.061	0	0	0	0	0	0	0	0	0	0	0	0	0
0	2093	hcd	579.11	2088.69	167.055	0	0	0	0	0	0	0	0	0	0	0	0	0
0	2113	hcd	313.85	16148.7	225.043	0	0	0	0	0	0	0	0	0	0	0	0	0
0	2131	hcd	413.27	7528.53	413.266	0	0	0	0	0	0	0	0	0	0	0	0	0
0	2139	hcd	308.9	115630	308.9	0	0	0	0	0	0	0	0	0	0	0	0	0
0	2158	hcd	681.23	5996.14	239.095	0	0	0	0	0	0	0	0	0	0	0	0	0
0	2175	hcd	624.24	5938.03	239.095	0	0	0	0	0	0	0	0	0	0	0	0	0
0	2194	hcd	337.2	11274.5	313.859	0	0	0	0	0	0	0	0	0	0	0	0	0
0	2203	hcd	669.18	7306.35	361.025	0	0	0	0	0	0	0	0	0	0	0	0	0
0	2217	hcd	495.83	46193.7	495.833	0	0	0	0	0	0	0	0	0	0	0	0	0
0	2241	hcd	439.84	63046.2	439.843	0	0	0	0	0	0	0	0	0	0	0	0	0
0	2264	hcd	335.22	30711.2	223.064	0	0	0	0	0	0	0	0	0	0	0	0	0
0	2339	hcd	421.32	3440.93	149.023	0	0	0	0	0	0	0	0	0	0	0	0	0
0	2363	hcd	684.2	8874.55	359.028	0	0	0	0	0	0	0	0	0	0	0	0	0
0	2399	hcd	413.27	6485.14	413.266	0	0	0	0	0	0	0	0	0	0	0	0	0
0	2433	hcd	308.9	113875	308.9	0	0	0	0	0	0	0	0	0	0	0	0	0
0	2450	hcd	337.2	13636.3	313.859	0	0	0	0	0	0	0	0	0	0	0	0	0
0	2463	hcd	313.85	12229.9	225.043	0	0	0	0	0	0	0	0	0	0	0	0	0
0	2479	hcd	439.84	51887.9	439.844	0	0	0	0	0	0	0	0	0	0	0	0	0
0	2530	hcd	335.22	22611.3	223.064	0	0	0	0	0	0	0	0	0	0	0	0	0
0	2567	hcd	681.23	6536.43	239.095	0	0	0	0	0	0	0	0	0	0	0	0	0
0	2568	hcd	669.18	5741.51	361.026	0	0	0	0	0	0	0	0	0	0	0	0	0
0	2572	hcd	421.32	3209.35	149.023	0	0	0	0	0	0	0	0	0	0	0	0	0
0	2591	hcd	341.05	1740.88	229.008	0	0	0	0	0	0	0	0	0	0	0	0	0
0	2613	hcd	341.34	4044.65	229.008	0	0	0	0	0	0	0	0	0	0	0	0	0
0	2659	hcd	352.44	9252.05	352.238	0	0	0	0	0	0	0	0	0	0	0	0	0
0	2684	hcd	337.2	12274.7	313.858	0	0	0	0	0	0	0	0	0	0	0	0	0
0	2745	hcd	439.84	58822	439.843	0	0	0	0	0	0	0	0	0	0	0	0	0
0	2748	hcd	413.27	9211.14	413.266	0	0	0	0	0	0	0	0	0	0	0	0	0
0	2758	hcd	550.22	11925	239.095	0	0	0	0	0	0	0	0	0	0	0	0	0
0	2810	hcd	421.32	3184.51	149.024	0	0	0	0	0	0	0	0	0	0	0	0	0
0	2811	hcd	335.22	29503.8	223.063	0	0	0	0	0	0	0	0	0	0	0	0	0
0	2831	hcd	669.18	5610.63	359.028	0	0	0	0	0	0	0	0	0	0	0	0	0
0	2834	hcd	313.85	14306.1	225.043	0	0	0	0	0	0	0	0	0	0	0	0	0
0	2843	hcd	341.05	1047.78	229.009	0	0	0	0	0	0	0	0	0	0	0	0	0
0	2865	hcd	624.24	4997.33	225.043	0	0	0	0	0	0	0	0	0	0	0	0	0
0	2891	hcd	434.88	1159.03	210.95	0	0	0	0	0	0	0	0	0	0	0	0	0
0	2914	hcd	337.2	11617.5	313.858	0	0	0	0	0	0	0	0	0	0	0	0	0
0	2980	hcd	439.84	54289.7	439.844	0	0	0	0	0	0	0	0	0	0	0	0	0
0	2998	hcd	321.21	27975.8	149.023	0	0	0	0	0	0	0	0	0	0	0	0	0
0	3026	hcd	413.27	8136.04	413.265	0	0	0	0	0	0	0	0	0	0	0	0	0
0	3044	hcd	421.32	3325.5	149.023	0	0	0	0	0	0	0	0	0	0	0	0	0
0	3053	hcd	684.2	7176.61	359.028	0	0	0	0	0	0	0	0	0	0	0	0	0
0	3069	hcd	313.85	13363.3	225.043	0	0	0	0	0	0	0	0	0	0	0	0	0
0	3074	hcd	335.22	30425.9	223.063	0	0	0	0	0	0	0	0	0	0	0	0	0
0	3190	hcd	681.23	6237.31	225.043	0	0	0	0	0	0	0	0	0	0	0	0	0
0	3212	hcd	439.84	48493.6	439.844	0	0	0	0	0	0	0	0	0	0	0	0	0
0	3260	hcd	413.27	12218.3	413.266	0	0	0	0	0	0	0	0	0	0	0	0	0
0	3264	hcd	441.3	12408.9	440.844	0	0	0	0	0	0	0	0	0	0	0	0	0
0	3272	hcd	495.83	46547.3	495.833	0	0	0	0	0	0	0	0	0	0	0	0	0
0	3275	hcd	337.2	7242.67	336.894	0	0	0	0	0	0	0	0	0	0	0	0	0
0	3283	hcd	421.32	2853.9	149.023	0	0	0	0	0	0	0	0	0	0	0	0	0
0	3292	hcd	684.2	9422.88	359.027	0	0	0	0	0	0	0	0	0	0	0	0	0
0	3308	hcd	313.85	14612.8	225.043	0	0	0	0	0	0	0	0	0	0	0	0	0
0	3371	hcd	335.22	23875.5	223.063	0	0	0	0	0	0	0	0	0	0	0	0	0
0	3381	hcd	607.21	17082.8	239.094	0	0	0	0	0	0	0	0	0	0	0	0	0
0	3384	hcd	579.11	1198.4	1169.82	0	0	0	0	0	0	0	0	0	0	0	0	0
0	3389	hcd	352.44	6349.06	352.238	0	0	0	0	0	0	0	0	0	0	0	0	0
0	3407	hcd	313.11	34639.5	225.042	0	0	0	0	0	0	0	0	0	0	0	0	0
0	3450	hcd	439.84	32794.9	439.843	0	0	0	0	0	0	0	0	0	0	0	0	0
0	3489	hcd	413.27	7494.16	413.267	372.56	372.56	0	0	0	0	0	0	0	0	0	0	0
0	3496	hcd	441.3	8219.17	440.844	0	0	0	0	0	0	0	0	0	0	0	0	0
0	3500	hcd	550.22	8074.6	239.094	0	0	0	0	0	0	0	0	0	0	0	0	0
0	3563	hcd	434.88	1426.99	210.95	0	0	0	0	0	0	0	0	0	0	0	0	0
0	3572	hcd	669.17	6306.54	361.026	0	0	0	0	0	0	0	0	0	0	0	0	0
0	3585	hcd	684.2	7763.56	359.027	0	0	0	0	0	0	0	0	0	0	0	0	0
0	3625	hcd	335.22	24285.5	223.063	0	0	0	0	0	0	0	0	0	0	0	0	0
0	3645	hcd	681.23	4357.1	225.042	0	0	0	0	0	0	0	0	0	0	0	0	0
0	3681	hcd	403.23	9919.6	185.081	0	0	0	0	0	0	0	0	0	0	0	0	0
0	3695	hcd	341.34	3620.45	323.872	0	0	0	0	0	0	0	0	0	0	0	0	0
0	3703	hcd	439.84	29032	439.844	0	0	0	0	0	0	0	0	0	0	0	0	0
0	3708	hcd	339.36	2848.02	321.893	0	0	0	0	0	0	0	0	0	0	0	0	0
0	3720	hcd	413.27	7523.24	413.265	0	0	0	0	0	0	0	0	0	0	0	0	0
0	3723	hcd	432.89	4010.58	210.95	0	0	0	0	0	0	0	0	0	0	0	0	0
0	3737	hcd	361.15	14736	223.064	0	0	0	0	0	0	0	0	0	0	0	0	0
0	3751	hcd	337.2	7031.37	304.889	0	0	0	0	0	0	0	0	0	0	0	0	0
0	3846	hcd	684.2	5830.83	359.028	0	0	0	0	0	0	0	0	0	0	0	0	0
0	3863	hcd	335.22	27016.9	223.064	0	0	0	0	0	0	0	0	0	0	0	0	0
0	3928	hcd	550.22	6772.84	239.095	0	0	0	0	0	0	0	0	0	0	0	0	0
0	3941	hcd	439.84	26103.6	439.843	0	0	0	0	0	0	0	0	0	0	0	0	0
0	3999	hcd	413.27	6394.89	413.265	0	0	0	0	0	0	0	0	0	0	0	0	0
0	4007	hcd	341.34	3864.18	323.872	0	0	0	0	0	0	0	0	0	0	0	0	0
0	4022	hcd	669.17	7329.04	361.026	0	0	0	0	0	0	0	0	0	0	0	0	0
0	4035	hcd	495.83	21037.8	495.833	0	0	0	0	0	0	0	0	0	0	0	0	0
0	4094	hcd	743.19	4523.95	301.059	0	0	0	0	0	0	0	0	0	0	0	0	0
0	4133	hcd	684.21	5974.86	359.028	0	0	0	0	0	0	0	0	0	0	0	0	0
0	4143	hcd	319.21	75107.1	171.099	0	0	0	0	0	0	0	0	0	0	0	0	0
0	4150	hcd	337.2	5313.53	304.89	0	0	0	0	0	0	0	0	0	0	0	0	0
0	4153	hcd	352.44	4279.63	352.238	0	0	0	0	0	0	0	0	0	0	0	0	0
0	4167	hcd	624.24	4327.13	225.043	647.48	0	0	0	0	0	0	647.48	0	0	0	0	0							1.45											33100
0	4179	hcd	439.84	26508	439.843	0	0	0	0	0	0	0	0	0	0	0	0	0
0	4193	hcd	331	10305.8	176.989	0	0	0	0	0	0	0	0	0	0	0	0	0
0	4200	hcd	335.22	22162.1	223.063	0	0	0	0	0	0	0	0	0	0	0	0	0
0	4217	hcd	313.11	32415.9	225.043	0	0	0	0	0	0	0	0	0	0	0	0	0
0	4218	hcd	403.23	7502.42	185.081	0	0	0	0	0	0	0	0	0	0	0	0	0
0	4282	hcd	413.27	6672.62	413.265	0	0	0	0	0	0	0	0	0	0	0	0	0
0	4327	hcd	815.21	5541.29	355.07	0	0	0	0	0	0	0	0	0	0	0	0	0
0	4385	hcd	337.2	6415.06	308.9	0	0	0	0	0	0	0	0	0	0	0	0	0
0	4413	hcd	439.84	23839.3	439.844	0	0	0	0	0	0	0	0	0	0	0	0	0
0	4417	hcd	743.19	1875.95	301.059	0	0	0	0	0	0	0	0	0	0	0	0	0
0	4441	hcd	335.22	27325.7	223.064	0	0	0	0	0	0	0	0	0	0	0	0	0
0	4472	hcd	550.22	9714.44	239.095	0	0	0	0	0	0	0	0	0	0	0	0	0
0	4485	hcd	624.24	7970.12	239.095	0	0	0	0	0	0	0	0	0	0	0	0	0
0	4495	hcd	607.21	16754	239.095	0	0	0	0	0	0	0	0	0	0	0	0	0
0	4501	hcd	352.44	5631.99	352.239	0	0	0	0	0	0	0	0	0	0	0	0	0
0	4502	hcd	684.2	9089.91	359.028	0	0	0	0	0	0	0	0	0	0	0	0	0
0	4534	hcd	495.83	12800.4	495.833	0	0	0	0	0	0	0	0	0	0	0	0	0
0	4537	hcd	595.16	8007.15	285.01	0	0	0	0	0	0	0	0	0	0	0	0	0
0	4576	hcd	669.18	5485.22	361.026	0	0	0	0	0	0	0	0	0	0	0	0	0
0	4639	hcd	610.19	8547.4	355.07	0	0	0	0	0	0	0	0	0	0	0	0	0
0	4651	hcd	681.23	6371.86	239.095	0	0	0	0	0	0	0	0	0	0	0	0	0
0	4654	hcd	337.2	7305.64	308.9	0	0	0	0	0	0	0	0	0	0	0	0	0
0	4674	hcd	433.33	1941.67	149.023	0	0	0	0	0	0	0	0	0	0	0	0	0
0	4698	hcd	439.84	22017.1	439.844	0	0	0	0	0	0	0	0	0	0	0	0	0
0	4710	hcd	335.22	24953.4	223.064	0	0	0	0	0	0	0	0	0	0	0	0	0
0	4711	hcd	432.88	3455.36	210.95	0	0	0	0	0	0	0	0	0	0	0	0	0
0	4715	hcd	758.22	2418.14	299.061	0	0	0	0	0	0	0	0	0	0	0	0	0
0	4729	hcd	624.24	5634.76	225.043	624.84	0	624.84	0	0	0	0	0	0	0	0	0	0		1.4											31200
0	4743	hcd	402.18	11134.5	225.043	0	0	0	0	0	0	0	0	0	0	0	0	0
0	4776	hcd	352.44	6997.53	352.239	0	0	0	0	0	0	0	0	0	0	0	0	0
0	4816	hcd	684.2	7436.98	359.028	0	0	0	0	0	0	0	0	0	0	0	0	0
0	4836	hcd	313.31	39592.2	225.043	0	0	0	0	0	0	0	0	0	0	0	0	0
0	4872	hcd	476.2	8814.03	239.095	0	0	0	0	0	0	0	0	0	0	0	0	0
0	4873	hcd	743.19	2094.49	299.061	0	0	0	0	0	0	0	0	0	0	0	0	0
0	4886	hcd	515.16	16272.8	269.179	0	0	0	0	0	0	0	0	0	0	0	0	0
0	4921	hcd	344.03	15161.8	174.992	0	0	0	0	0	0	0	0	0	0	0	0	0
0	4932	hcd	319.21	74204.8	171.099	0	0	0	0	0	0	0	0	0	0	0	0	0
0	4936	hcd	441.3	6161.09	440.845	0	0	0	0	0	0	0	0	0	0	0	0	0
0	4959	hcd	335.22	29232.8	223.064	0	0	0	0	0	0	0	0	0	0	0	0	0
0	4989	hcd	550.22	10254.6	239.095	0	0	0	0	0	0	0	0	0	0	0	0	0
0	4998	hcd	439.84	19122.7	439.844	0	0	0	0	0	0	0	0	0	0	0	0	0
0	5003	hcd	758.22	1736.27	299.061	0	0	0	0	0	0	0	0	0	0	0	0	0
0	5015	hcd	352.44	4741.13	352.238	0	0	0	0	0	0	0	0	0	0	0	0	0
0	5018	hcd	434.88	1441.54	419.837	0	0	0	0	0	0	0	0	0	0	0	0	0
0	5115	hcd	579.11	1830.98	167.055	0	0	0	0	0	0	0	0	0	0	0	0	0
0	5144	hcd	312.91	20594.9	225.043	0	0	0	0	0	0	0	0	0	0	0	0	0
0	5148	hcd	624.24	6103.21	239.095	0	0	0	0	0	0	0	0	0	0	0	0	0
0	5197	hcd	441.3	4605.33	440.844	0	0	0	0	0	0	0	0	0	0	0	0	0
0	5257	hcd	439.84	17733.3	439.844	0	0	0	0	0	0	0	0	0	0	0	0	0
0	5260	hcd	352.44	5960.37	352.238	0	0	0	0	0	0	0	0	0	0	0	0	0
0	5282	hcd	335.22	21896.7	223.063	0	0	0	0	0	0	0	0	0	0	0	0	0
0	5341	hcd	339.36	3918.27	320.9	0	0	0	0	0	0	0	0	0	0	0	0	0
0	5352	hcd	743.19	5276.89	299.062	0	0	0	0	0	0	0	0	0	0	0	0	0
0	5404	hcd	313.11	30645.9	225.043	0	0	0	0	0	0	0	0	0	0	0	0	0
0	5412	hcd	669.17	6116.59	361.025	0	0	0	0	0	0	0	0	0	0	0	0	0
0	5422	hcd	625.24	1520.2	239.095	0	0	0	0	0	0	0	0	0	0	0	0	0
0	5425	hcd	441.3	4742.9	440.844	0	0	0	0	0	0	0	0	0	0	0	0	0
0	5436	hcd	337.2	8462.08	304.89	0	0	0	0	0	0	0	0	0	0	0	0	0
0	5447	hcd	685.2	1515.55	1124.98	0	0	0	0	0	0	0	0	0	0	0	0	0
0	5509	hcd	550.22	8944.93	239.095	0	0	0	0	0	0	0	0	0	0	0	0	0
0	5538	hcd	439.84	14798.9	439.844	0	0	0	0	0	0	0	0	0	0	0	0	0
0	5551	hcd	335.22	23341	223.064	0	0	0	0	0	0	0	0	0	0	0	0	0
0	5552	hcd	352.44	6467.37	352.238	0	0	0	0	0	0	0	0	0	0	0	0	0
0	5556	hcd	433.33	3111.58	344.976	0	0	0	0	0	0	0	0	0	0	0	0	0
0	5574	hcd	339.36	3726.12	338.91	0	0	0	0	0	0	0	0	0	0	0	0	0
0	5705	hcd	669.18	5074.49	361.026	0	0	0	0	0	0	0	0	0	0	0	0	0
0	5730	hcd	684.2	5432.53	359.029	0	0	0	0	0	0	0	0	0	0	0	0	0
0	5744	hcd	624.24	5145.93	239.095	0	0	0	0	0	0	0	0	0	0	0	0	0
0	5749	hcd	550.22	7583.07	239.095	0	0	0	0	0	0	0	0	0	0	0	0	0
0	5754	hcd	476.2	6680.43	239.095	0	0	0	0	0	0	0	0	0	0	0	0	0
0	5766	hcd	306.93	5458.57	306.906	0	0	0	0	0	0	0	0	0	0	0	0	0
0	5770	hcd	301.98	10438.4	284.961	0	0	0	0	0	0	0	0	0	0	0	0	0
0	5780	hcd	416.9	908.34	835.22	0	0	0	0	0	0	0	0	0	0	0	0	0
0	5788	hcd	493.89	3707.16	376.887	0	0	0	0	0	0	0	0	0	0	0	0	0
0	5801	hcd	405.3	4741.91	149.023	0	0	0	0	0	0	0	0	0	0	0	0	0
0	5807	hcd	352.44	6539.39	352.238	0	0	0	0	0	0	0	0	0	0	0	0	0
0	5846	hcd	439.84	15625.8	439.844	0	0	0	0	0	0	0	0	0	0	0	0	0
0	5889	hcd	341.34	5299.46	323.872	0	0	0	0	0	0	0	0	0	0	0	0	0
0	5914	hcd	743.19	4312.29	299.062	0	0	0	0	0	0	0	0	0	0	0	0	0
0	5966	hcd	335.23	23009.8	223.063	0	0	0	0	0	0	0	0	0	0	0	0	0
0	5984	hcd	403.23	10828.8	308.952	0	0	0	0	0	0	0	0	0	0	0	0	0
0	6044	hcd	476.2	5965.04	299.062	0	0	0	0	0	0	0	0	0	0	0	0	0
0	6089	hcd	681.23	2116.06	239.095	0	0	0	0	0	0	0	0	0	0	0	0	0
0	6119	hcd	439.84	20947.1	439.844	0	0	0	0	0	0	0	0	0	0	0	0	0
0	6133	hcd	758.22	2322.73	299.061	0	0	0	0	0	0	0	0	0	0	0	0	0
0	6136	hcd	515.16	2051.78	301.13	0	0	0	0	0	0	0	0	0	0	0	0	0
0	6158	hcd	352.44	6738.05	352.238	0	0	0	0	0	0	0	0	0	0	0	0	0
0	6196	hcd	451.96	1363.88	278.158	0	0	0	0	0	0	0	0	0	0	0	0	0
0	6199	hcd	341.34	3168.26	323.872	0	0	0	0	0	0	0	0	0	0	0	0	0
0	6202	hcd	484.2	1641.01	499.25	0	0	0	0	0	0	0	0	0	0	0	0	0
0	6206	hcd	645.26	1774.91	389.491	0	0	0	0	0	0	0	0	0	0	0	0	0
0	6207	hcd	516.71	1142.41	1682.45	0	0	0	0	0	0	0	0	0	0	0	0	0
0	6222	hcd	556.25	1444.21	1636.03	0	0	0	0	0	0	0	0	0	0	0	0	0
0	6227	hcd	645.59	1564.86	1154.08	0	0	0	0	0	0	0	0	0	0	0	0	0
0	6242	hcd	413.93	7184.56	413.266	0	0	0	0	0	0	0	0	0	0	0	0	0
0	6263	hcd	487.2	1233.8	1919.32	0	0	0	0	0	0	0	0	0	0	0	0	0
0	6294	hcd	515.96	1106.67	1063.73	0	0	0	0	0	0	0	0	0	0	0	0	0
0	6300	hcd	551.58	1177.39	239.095	0	0	0	0	0	0	0	0	0	0	0	0	0
0	6312	hcd	538.57	10899.4	299.062	0	0	0	0	0	0	0	0	0	0	0	0	0
0	6313	hcd	516.21	1222.69	1142.68	0	0	0	0	0	0	0	0	0	0	0	0	0
0	6324	hcd	681.23	6054.41	239.095	0	0	0	0	0	0	0	0	0	0	0	0	0
0	6353	hcd	337.2	6815.6	304.89	0	0	0	0	0	0	0	0	0	0	0	0	0
0	6354	hcd	439.84	18598.6	439.844	0	0	0	0	0	0	0	0	0	0	0	0	0
0	6369	hcd	413.27	10944.9	413.266	0	0	0	0	0	0	0	0	0	0	0	0	0
0	6372	hcd	318.23	21554.3	318.234	15469.9	15469.9	0	0	0	0	0	0	0	0	0	0	0	49.91											49202
0	6419	hcd	323.43	2891.05	126.128	2872.05	2872.05	0	0	0	0	0	0	0	0	0	0	0	9.14											47600
0	6425	hcd	635.91	1460.18	938.556	0	0	0	0	0	0	0	0	0	0	0	0	0
0	6432	hcd	452.21	1059.76	742.153	982.66	982.66	0	0	0	0	0	0	0	0	0	0	0	2.54											35000
0	6445	hcd	451.96	1081.88	808.828	0	0	0	0	0	0	0	0	0	0	0	0	0
0	6448	hcd	341.34	1301.64	341.094	0	0	0	0	0	0	0	0	0	0	0	0	0
0	6465	hcd	476.94	1287.11	239.095	0	0	0	0	0	0	0	0	0	0	0	0	0
0	6468	hcd	352.44	6725.42	352.239	0	0	0	0	0	0	0	0	0	0	0	0	0
0	6471	hcd	635.58	1133.88	621.131	0	0	0	0	0	0	0	0	0	0	0	0	0
0	6514	hcd	412.68	3758.86	413.266	921.96	921.96	0	0	0	0	0	0	0	0	0	0	0	2.66											34800
0	6515	hcd	335.22	35410.2	223.064	762.39	762.39	0	0	0	0	0	0	0	0	0	0	0	2.46											35000
0	6516	hcd	515.25	1095.04	361.135	0	0	0	0	0	0	0	0	0	0	0	0	0
0	6524	hcd	386.69	12440.1	167.055	0	0	0	0	0	0	0	0	0	0	0	0	0
0	6561	hcd	498.86	1422.59	369.199	0	0	0	0	0	0	0	0	0	0	0	0	0
0	6572	hcd	681.23	5722.63	239.095	0	0	0	0	0	0	0	0	0	0	0	0	0
0	6576	hcd	530.9	1143.94	1580.53	0	0	0	0	0	0	0	0	0	0	0	0	0
0	6584	hcd	405.3	5607.58	149.023	0	0	0	0	0	0	0	0	0	0	0	0	0
0	6588	hcd	472.9	1116.46	857.833	867.3	867.3	0	0	0	0	0	0	0	0	0	0	0	2.27											34900
0	6595	hcd	439.84	18312	439.844	0	0	0	0	0	0	0	0	0	0	0	0	0
0	6598	hcd	413.27	9356.6	413.266	1370.86	1370.86	0	0	0	0	0	0	0	0	0	0	0	3.96											34100
0	6608	hcd	564.76	2654.38	389.443	542.59	542.59	0	0	0	0	0	0	0	0	0	0	0	1.3											33300
0	6609	hcd	513.19	6555.93	272.172	0	0	0	0	0	0	0	0	0	0	0	0	0
0	6612	hcd	769.28	10384.1	272.172	0	0	0	0	0	0	0	0	0	0	0	0	0
0	6613	hcd	525.84	2696.4	389.413	0	0	0	0	0	0	0	0	0	0	0	0	0
0	6614	hcd	440.53	8277.34	439.844	0	0	0	0	0	0	0	0	0	0	0	0	0
0	6615	hcd	530.83	1170.29	940.513	0	0	0	0	0	0	0	0	0	0	0	0	0
0	6620	hcd	394.63	4104.74	150.027	0	0	0	0	0	0	0	0	0	0	0	0	0
0	6621	hcd	796.24	2693.19	389.378	0	0	0	0	0	0	0	0	0	0	0	0	0
0	6622	hcd	380.19	11324.1	380.266	5877.61	5877.61	0	0	0	0	0	0	0	0	0	0	0	16.51											46402
0	6625	hcd	521.51	25514.2	299.062	0	0	0	0	0	0	0	0	0	0	0	0	0
0	6626	hcd	543.48	1262.51	1170.77	0	0	0	0	0	0	0	0	0	0	0	0	0
0	6627	hcd	399.13	1942.4	389.366	0	0	0	0	0	0	0	0	0	0	0	0	0
0	6628	hcd	528.18	1940.16	272.171	0	0	0	0	0	0	0	0	0	0	0	0	0
0	6630	hcd	788.25	2247.97	389.365	0	0	0	0	0	0	0	0	0	0	0	0	0
0	6631	hcd	791.76	4949.61	389.33	0	0	0	0	0	0	0	0	0	0	0	0	0
0	6632	hcd	548.8	1273.75	805.179	0	0	0	0	0	0	0	0	0	0	0	0	0
0	6635	hcd	580.61	1307.17	1191.35	0	0	0	0	0	0	0	0	0	0	0	0	0
0	6638	hcd	435.96	1310.14	402.894	670.43	670.43	0	0	0	0	0	0	0	0	0	0	0	1.87											36200
0	6642	hcd	559.9	1672.88	389.334	0	0	0	0	0	0	0	0	0	0	0	0	0
0	6643	hcd	397.87	3560.14	126.128	3557.98	3557.98	0	0	0	0	0	0	0	0	0	0	0	9.76											44500
0	6646	hcd	468.23	4970.76	467.838	0	0	0	0	0	0	0	0	0	0	0	0	0
0	6647	hcd	614.95	1423.68	1827.19	0	0	0	0	0	0	0	0	0	0	0	0	0
0	6651	hcd	516.23	1797.18	729.362	906.71	906.71	0	0	0	0	0	0	0	0	0	0	0	2.3											33400
0	6655	hcd	459.21	31465.9	225.043	0	0	0	0	0	0	0	0	0	0	0	0	0
0	6659	hcd	879.03	2241.04	389.337	0	0	0	0	0	0	0	0	0	0	0	0	0
0	6660	hcd	473.97	2820.76	389.351	0	0	0	0	0	0	0	0	0	0	0	0	0
0	6661	hcd	560.57	1247.21	1459.91	0	0	0	0	0	0	0	0	0	0	0	0	0
0	6670	hcd	452.21	1370.49	278.159	833.22	833.22	0	0	0	0	0	0	0	0	0	0	0	2.21											34600
0	6671	hcd	404.54	7311.25	299.062	1248.94	1248.94	0	0	0	0	0	0	0	0	0	0	0	3.46											35000
0	6675	hcd	416.87	1759.44	389.384	0	0	0	0	0	0	0	0	0	0	0	0	0
0	6676	hcd	779.34	2033.74	2067.7	0	0	0	0	0	0	0	0	0	0	0	0	0
0	6684	hcd	323.43	1689.96	126.128	1681.41	1681.41	0	0	0	0	0	0	0	0	0	0	0	5.19											34800
0	6693	hcd	416.53	1581.72	389.38	0	0	0	0	0	0	0	0	0	0	0	0	0
0	6694	hcd	516.46	1404.67	1711.48	0	0	0	0	0	0	0	0	0	0	0	0	0
0	6702	hcd	341.34	1550.78	341.094	441.22	441.22	0	0	0	0	0	0	0	0	0	0	0	1.3											35200
0	6705	hcd	476.94	3956.84	387.453	0	0	0	0	0	0	0	0	0	0	0	0	0
0	6709	hcd	636.25	1738.57	528.611	0	0	0	0	0	0	0	0	0	0	0	0	0
0	6713	hcd	332.42	4303.05	223.064	885.49	885.49	0	0	0	0	0	0	0	0	0	0	0	2.75											35600
0	6719	hcd	499.21	1138.17	1279.56	0	0	0	0	0	0	0	0	0	0	0	0	0
0	6722	hcd	451.71	1861.29	389.335	799.54	799.54	0	0	0	0	0	0	0	0	0	0	0	2.27											36100
0	6723	hcd	352.44	6105.54	352.238	509.9	509.9	0	0	0	0	0	0	0	0	0	0	0	1.57											36000
0	6738	hcd	360.54	4356.3	223.064	3013.44	3013.44	0	0	0	0	0	0	0	0	0	0	0	8.86											46700
0	6744	hcd	524.47	1817.91	1578.6	0	0	0	0	0	0	0	0	0	0	0	0	0
0	6749	hcd	512.46	3003.4	389.376	0	0	0	0	0	0	0	0	0	0	0	0	0
0	6750	hcd	541.25	1321.28	563.871	0	0	0	0	0	0	0	0	0	0	0	0	0
0	6756	hcd	515.58	1905.71	389.353	0	0	0	0	0	0	0	0	0	0	0	0	0
0	6757	hcd	453.21	1847.91	229.009	881.77	881.77	0	0	0	0	0	0	0	0	0	0	0	2.48											34600
0	6758	hcd	366.19	1609.61	500.254	0	0	0	0	0	0	0	0	0	0	0	0	0
0	6764	hcd	543.2	1473.16	389.345	0	0	0	0	0	0	0	0	0	0	0	0	0
0	6765	hcd	425.53	1765.83	389.326	0	0	0	0	0	0	0	0	0	0	0	0	0
0	6766	hcd	488.96	1393.88	389.308	0	0	0	0	0	0	0	0	0	0	0	0	0
0	6767	hcd	437.38	1109.44	1231.27	0	0	0	0	0	0	0	0	0	0	0	0	0
0	6772	hcd	565.01	1618.24	1619.88	0	0	0	0	0	0	0	0	0	0	0	0	0
0	6775	hcd	541.58	1932.26	389.317	1505.41	1505.41	0	0	0	0	0	0	0	0	0	0	0	3.72											32200
0	6776	hcd	492.91	1211.4	945.066	0	0	0	0	0	0	0	0	0	0	0	0	0
0	6784	hcd	489.9	1192.85	1073.39	507.95	507.95	0	0	0	0	0	0	0	0	0	0	0	1.29											36000
0	6790	hcd	405.94	1652.97	149.023	1135.09	1135.09	0	0	0	0	0	0	0	0	0	0	0	3.28											33700
0	6791	hcd	524.97	1317.65	1996.59	0	0	0	0	0	0	0	0	0	0	0	0	0
0	6804	hcd	432.89	5082.59	210.95	0	0	0	0	0	0	0	0	0	0	0	0	0
0	6810	hcd	456.94	1091.98	620.716	0	0	0	0	0	0	0	0	0	0	0	0	0
0	6813	hcd	557.22	1420.84	1489.42	0	0	0	0	0	0	0	0	0	0	0	0	0
0	6817	hcd	487.87	1113.87	1481.5	0	0	0	0	0	0	0	0	0	0	0	0	0
0	6821	hcd	555.57	1435.5	1503.06	0	0	0	0	0	0	0	0	0	0	0	0	0
0	6825	hcd	416.93	3737.57	175.119	0	0	0	0	0	0	0	0	0	0	0	0	0
0	6833	hcd	399.7	2597.51	389.333	1154.63	1154.63	0	0	0	0	0	0	0	0	0	0	0	3.49											34200
0	6834	hcd	380.59	4579.55	380.266	778.52	778.52	0	0	0	0	0	0	0	0	0	0	0	2.3											35500
0	6845	hcd	366.15	2900.09	343.209	0	0	0	0	0	0	0	0	0	0	0	0	0
0	6846	hcd	412.93	5947.66	413.266	3693.67	3693.67	0	0	0	0	0	0	0	0	0	0	0	10.21											44100
0	6864	hcd	413.27	8527.25	413.265	1675.67	1675.67	0	0	0	0	0	0	0	0	0	0	0	4.66											34400
0	6865	hcd	452.95	3094.05	389.325	1508.69	1508.69	0	0	0	0	0	0	0	0	0	0	0	4.09											34800
0	6866	hcd	336.93	6704.76	336.894	751.53	751.53	0	0	0	0	0	0	0	0	0	0	0	2.47											32700
0	6872	hcd	564.25	1463.58	680.543	630.96	630.96	0	0	0	0	0	0	0	0	0	0	0	1.54											33500
0	6875	hcd	580.61	2178.4	389.319	0	0	0	0	0	0	0	0	0	0	0	0	0
0	6876	hcd	410.2	1399.67	126.128	1377.49	1377.49	0	0	0	0	0	0	0	0	0	0	0	3.97											34900
0	6879	hcd	435.96	3166.31	389.297	1228.4	1228.4	0	0	0	0	0	0	0	0	0	0	0	3.38											32400
0	6880	hcd	379.18	3397.16	346.524	0	0	0	0	0	0	0	0	0	0	0	0	0
0	6883	hcd	581.59	4768.29	548.935	0	0	0	0	0	0	0	0	0	0	0	0	0
0	6887	hcd	570.26	1301.92	1559.61	0	0	0	0	0	0	0	0	0	0	0	0	0
0	6891	hcd	578.93	2044.91	167.055	0	0	0	0	0	0	0	0	0	0	0	0	0
0	6892	hcd	550.22	7034.57	239.095	0	0	0	0	0	0	0	0	0	0	0	0	0
0	6896	hcd	478.95	3030.99	350.163	1336.03	1336.03	0	0	0	0	0	0	0	0	0	0	0	3.67											33200
0	6897	hcd	590.91	1356.12	1511.94	689.04	689.04	0	0	0	0	0	0	0	0	0	0	0	1.56											34100
0	6900	hcd	436.45	3300.26	438.718	1176.45	1176.45	0	0	0	0	0	0	0	0	0	0	0	3.14											35500
0	6906	hcd	571.59	1553.48	389.265	0	0	0	0	0	0	0	0	0	0	0	0	0
0	6907	hcd	449.68	10196.9	363.023	0	0	0	0	0	0	0	0	0	0	0	0	0
0	6912	hcd	442.18	1348.35	441.844	0	0	0	0	0	0	0	0	0	0	0	0	0
0	6915	hcd	646.3	2244.3	495.751	0	0	0	0	0	0	0	0	0	0	0	0	0
0	6920	hcd	871.38	2143.64	1567.82	0	0	0	0	0	0	0	0	0	0	0	0	0
0	6921	hcd	404.2	7603.5	299.062	3169.56	3169.56	0	0	0	0	0	0	0	0	0	0	0	9.17											45600
0	6922	hcd	509.55	1386.52	782.308	0	0	0	0	0	0	0	0	0	0	0	0	0
0	6927	hcd	509.21	1771.73	389.312	0	0	0	0	0	0	0	0	0	0	0	0	0
0	6928	hcd	599.23	1403.77	1784.16	0	0	0	0	0	0	0	0	0	0	0	0	0
0	6938	hcd	515.96	1615.76	2059.16	730.61	730.61	0	0	0	0	0	0	0	0	0	0	0	1.91											36200
0	6939	hcd	590.49	1108.35	1314.05	0	0	0	0	0	0	0	0	0	0	0	0	0
0	6943	hcd	536.21	60204.4	299.062	722.94	722.94	0	0	0	0	0	0	0	0	0	0	0	1.93											34100
0	6944	hcd	547.23	1463	1575.08	0	0	0	0	0	0	0	0	0	0	0	0	0
0	6947	hcd	477.19	1995.26	387.705	636.61	636.61	0	0	0	0	0	0	0	0	0	0	0	1.67											34100
0	6953	hcd	803.81	5394.91	754.824	0	0	0	0	0	0	0	0	0	0	0	0	0
0	6954	hcd	635.58	1227.24	1299.14	0	0	0	0	0	0	0	0	0	0	0	0	0
0	6958	hcd	584.5	1408.06	511.008	685.48	685.48	0	0	0	0	0	0	0	0	0	0	0	1.65											35300
0	6959	hcd	553.85	1235.47	1553.13	0	0	0	0	0	0	0	0	0	0	0	0	0
0	6963	hcd	416.14	1658.08	249.098	0	0	0	0	0	0	0	0	0	0	0	0	0
0	6964	hcd	427.94	8887.65	203.128	0	0	0	0	0	0	0	0	0	0	0	0	0
0	6965	hcd	402.66	8794.46	225.043	1136.98	1136.98	0	0	0	0	0	0	0	0	0	0	0	3.07											34300
0	6971	hcd	481.71	1442.76	1926.17	0	0	0	0	0	0	0	0	0	0	0	0	0
0	6972	hcd	530.2	1162.55	1195.43	0	0	0	0	0	0	0	0	0	0	0	0	0
0	6975	hcd	538.16	12534.6	299.062	0	0	0	0	0	0	0	0	0	0	0	0	0
0	6976	hcd	411.9	8778.08	411.849	0	0	0	0	0	0	0	0	0	0	0	0	0
0	6977	hcd	590.24	1511.33	1531.93	0	0	0	0	0	0	0	0	0	0	0	0	0
0	6980	hcd	641.62	1767.39	648.814	0	0	0	0	0	0	0	0	0	0	0	0	0
0	6981	hcd	548.86	2149.99	389.24	0	0	0	0	0	0	0	0	0	0	0	0	0
0	6982	hcd	682.28	1632.12	239.095	0	0	0	0	0	0	0	0	0	0	0	0	0
0	6985	hcd	554.52	1448.88	1551.87	0	0	0	0	0	0	0	0	0	0	0	0	0
0	6986	hcd	455.9	1143.7	437.848	519.12	519.12	0	0	0	0	0	0	0	0	0	0	0	1.39											31600
0	6989	hcd	344.53	10058.9	174.992	3514.49	3514.49	0	0	0	0	0	0	0	0	0	0	0	11.05											45300
0	6990	hcd	422.22	6081.74	126.128	5882.61	5882.61	0	0	0	0	0	0	0	0	0	0	0	16.58											47002
0	6991	hcd	397.71	2784.04	389.184	1200.36	1200.36	0	0	0	0	0	0	0	0	0	0	0	3.61											35800
0	6992	hcd	341.34	1273.71	229.009	852.01	852.01	0	0	0	0	0	0	0	0	0	0	0	2.6											34800
0	6995	hcd	511.96	14171.5	438.479	6362.54	6362.54	0	0	0	0	0	0	0	0	0	0	0	15.71											47302
0	6996	hcd	566.61	1135.14	821.66	0	0	0	0	0	0	0	0	0	0	0	0	0
0	7001	hcd	507.97	1227.21	747.137	1113.75	1113.75	0	0	0	0	0	0	0	0	0	0	0	2.69											35300
0	7006	hcd	515.25	3526.81	126.128	3444.58	3444.58	0	0	0	0	0	0	0	0	0	0	0	8.48											51600
0	7009	hcd	454.4	1223.15	988.66	0	0	0	0	0	0	0	0	0	0	0	0	0
0	7013	hcd	451.71	1852.79	389.236	650.4	650.4	0	0	0	0	0	0	0	0	0	0	0	1.87											36100
0	7014	hcd	478.55	1673.93	149.023	0	0	0	0	0	0	0	0	0	0	0	0	0
0	7017	hcd	441.42	3596.99	223.169	514.26	514.26	0	0	0	0	0	0	0	0	0	0	0	1.46											32600
0	7018	hcd	410.17	5039.34	377.541	1476.76	1476.76	0	0	0	0	0	0	0	0	0	0	0	4.58											34800
0	7019	hcd	456.2	1588.55	456.054	1260.38	1260.38	0	0	0	0	0	0	0	0	0	0	0	3.48											32400
0	7020	hcd	685.2	5729.02	359.028	0	0	0	0	0	0	0	0	0	0	0	0	0
0	7021	hcd	351.52	3067.28	300.93	523.91	523.91	0	0	0	0	0	0	0	0	0	0	0	1.55											33000
0	7023	hcd	540.91	3980.69	469.918	3433.33	3433.33	0	0	0	0	0	0	0	0	0	0	0	8.96											52500
0	7024	hcd	610.95	19346.3	355.07	2330.52	2330.52	0	0	0	0	0	0	0	0	0	0	0	5.52											35600
0	7025	hcd	378.87	4002.98	126.128	3975.77	3975.77	0	0	0	0	0	0	0	0	0	0	0	12.08											44500
0	7028	hcd	520.57	47722.7	300.062	32057.5	32057.5	0	0	0	0	0	0	0	0	0	0	0	53.36											49302
0	7029	hcd	439.2	5091.29	439.844	1001.3	1001.3	0	0	0	0	0	0	0	0	0	0	0	2.87											32900
0	7030	hcd	769.78	1595.88	272.171	0	0	0	0	0	0	0	0	0	0	0	0	0
0	7032	hcd	486.22	3525.43	272.171	0	0	0	0	0	0	0	0	0	0	0	0	0
0	7033	hcd	436.53	3404.6	411.209	1666.04	1666.04	0	0	0	0	0	0	0	0	0	0	0	4.52											35100
0	7038	hcd	344.86	4436.63	230.17	2829.79	2829.79	0	0	0	0	0	0	0	0	0	0	0	8.79											50000
0	7042	hcd	339.03	1343.07	389.161	0	0	0	0	0	0	0	0	0	0	0	0	0
0	7043	hcd	364.92	7031.29	320.434	4076.74	4076.74	358.05	0	0	0	428.66	0	0	0	0	0	0	12.77											45904
0	7044	hcd	591.92	12310.4	556.804	6691	6691	0	0	0	0	0	0	0	0	0	0	0	14.98											46302
0	7047	hcd	488.96	3830.6	488.767	885.27	885.27	0	0	0	0	0	0	0	0	0	0	0	2.25											34500
0	7052	hcd	527.69	1449.6	1938.82	1243.03	1243.03	0	0	0	0	0	0	0	0	0	0	0	3.06											35200
0	7055	hcd	416.87	4279.36	126.128	4109.13	4109.13	0	0	0	0	0	0	0	0	0	0	0	12.08											45700
0	7056	hcd	557.58	3616.15	126.127	3616.15	3616.15	0	0	0	0	0	0	0	0	0	0	0	8.6											49700
0	7057	hcd	405.94	1856.24	149.023	1414.62	1414.62	0	0	0	0	0	0	0	0	0	0	0	4.31											32400
0	7058	hcd	582.84	1441.96	1418.85	0	0	0	0	0	0	0	0	0	0	0	0	0
0	7063	hcd	600.27	1936.9	129.102	0	0	0	0	0	0	0	0	0	0	0	0	0
0	7064	hcd	633.78	2218.53	389.132	0	0	0	0	0	0	0	0	0	0	0	0	0
0	7065	hcd	425.87	12876.7	346.544	4435.04	4435.04	0	0	0	0	0	0	0	0	0	0	0	12.42											45900
0	7066	hcd	492.58	1227.35	1428.25	1058.53	1058.53	0	0	0	0	0	0	0	0	0	0	0	2.59											33700
0	7069	hcd	589.6	1566.82	389.147	0	0	0	0	0	0	0	0	0	0	0	0	0
0	7070	hcd	406.69	1307.47	126.128	1272.54	1272.54	0	0	0	0	0	0	0	0	0	0	0	3.88											33800
0	7073	hcd	442.2	3363.66	126.128	3256.81	3256.81	0	0	0	0	0	0	0	0	0	0	0	9.13											52000
0	7074	hcd	554.47	4443.52	554.282	1502.83	1502.83	0	0	0	0	0	0	0	0	0	0	0	3.79											33300
0	7075	hcd	575.26	1687.24	126.128	1669.57	1669.57	0	0	0	0	0	0	0	0	0	0	0	3.73											34600
0	7078	hcd	442.56	3431.65	175.119	1743.73	1743.73	0	0	0	0	0	0	0	0	0	0	0	4.63											33100
0	7081	hcd	669.18	8560.74	361.027	0	0	0	0	0	0	0	0	0	0	0	0	0
0	7082	hcd	636.25	2397.03	516.598	894.63	894.63	0	0	0	0	0	0	0	0	0	0	0	1.99											34300
0	7083	hcd	400.55	3886.3	126.128	3850.16	3850.16	0	0	0	0	0	0	0	0	0	0	0	11.53											45900
0	7084	hcd	587.82	4390.52	509.312	896.48	896.48	0	0	0	0	0	0	0	0	0	0	0	2											33700
0	7086	hcd	738.96	2414.62	641.312	0	0	0	0	0	0	0	0	0	0	0	0	0
0	7087	hcd	470.23	7003.44	400.234	1647.2	1647.2	0	0	0	0	0	0	0	0	0	0	0	4.29											34400
0	7088	hcd	364.54	6854.56	126.128	6846.4	6846.4	0	733.27	0	0	0	0	0	0	0	0	0	20.1		2.27									47406		35100
0	7091	hcd	360.54	3647.79	126.128	3607.42	3607.42	0	0	0	0	0	0	0	0	0	0	0	10.69											45300
0	7095	hcd	620.28	3809.36	389.118	0	0	0	0	0	0	0	0	0	0	0	0	0
0	7096	hcd	498.21	1236.25	1406.73	0	0	0	0	0	0	0	0	0	0	0	0	0
0	7099	hcd	437.72	3286.04	437.849	1832.18	1832.18	0	0	0	0	0	0	0	0	0	0	0	5.06											34800
0	7102	hcd	492.24	3879.38	443.248	1881.25	1881.25	0	0	0	0	0	0	0	0	0	0	0	4.67											34700
0	7103	hcd	489.57	1523.78	2318.2	564.87	564.87	0	0	0	0	0	0	0	0	0	0	0	1.51											33000
0	7107	hcd	526.27	7825.41	477.279	0	0	0	0	0	0	0	0	0	0	0	0	0
0	7108	hcd	554.28	13881.5	126.128	13759.5	13759.5	0	0	0	0	0	0	0	0	0	0	0	33.11											48902
0	7109	hcd	576.89	2238.11	389.098	0	0	0	0	0	0	0	0	0	0	0	0	0
0	7110	hcd	473.19	4234.59	248.18	3276.18	3276.18	0	0	0	0	0	0	0	0	0	0	0	8.59											49800
0	7114	hcd	432.92	10430.4	210.95	0	0	0	0	0	0	0	0	0	0	0	0	0
0	7115	hcd	305.85	34833.1	126.128	34803.8	34803.8	0	472.51	0	0	0	0	0	0	0	0	0	105.69		1.47									49702		36600
0	7118	hcd	583.77	4659.49	512.767	928.35	928.35	0	0	0	0	0	0	0	0	0	0	0	2.31											33100
0	7119	hcd	415.53	3051.18	126.128	2964.08	2964.08	0	0	0	0	0	0	0	0	0	0	0	8.68											45600
0	7121	hcd	470.74	5121.25	126.128	4994.9	4994.9	0	0	0	0	0	0	0	0	0	0	0	14.19											45900
0	7122	hcd	392.22	467551	149.023	323916	323916	0	0	0	0	0	0	0	0	0	0	0	63.22											49402
0	7123	hcd	499.89	3463.43	467.231	0	0	0	0	0	0	0	0	0	0	0	0	0
0	7124	hcd	412.68	3986.1	413.266	1810.48	1810.48	0	0	0	0	0	0	0	0	0	0	0	4.84											33200
0	7127	hcd	437.13	1603.05	126.127	1600.92	1600.92	0	0	451.08	410.05	0	0	0	0	0	0	0	4.27			1.18								34800			26300
0	7128	hcd	349.42	9093.18	149.023	486.55	486.55	0	0	0	0	0	0	0	0	0	0	0	1.53											32300
0	7129	hcd	403.11	7877.39	185.081	1376.72	1376.72	0	0	0	0	0	0	0	0	0	0	0	4.24											35100
0	7130	hcd	551.57	2018.8	486.582	1473.95	1473.95	0	0	0	0	0	0	0	0	0	0	0	3.49											35900
0	7133	hcd	545.23	1641.41	175.119	0	0	0	0	0	0	0	0	0	0	0	0	0
0	7134	hcd	453.2	3345.92	363.199	1574.64	1574.64	0	0	0	0	0	0	0	0	0	0	0	4.46											35700
0	7135	hcd	465.54	7430.11	362.025	0	0	0	0	0	0	0	0	0	0	0	0	0
0	7138	hcd	423.52	3029.57	126.128	2990.95	2990.95	0	0	0	0	0	0	0	0	0	0	0	7.95											51400
0	7139	hcd	729.3	1978.45	680.313	0	0	0	0	0	0	0	0	0	0	0	0	0
0	7140	hcd	580.61	1846.34	126.128	1842.84	1842.84	0	0	0	0	0	0	0	0	0	0	0	4.19											32500
0	7143	hcd	482.89	3711.98	330.19	0	0	0	0	0	0	0	0	0	0	0	0	0
0	7144	hcd	438.2	2837.76	126.128	2830.93	2830.93	0	0	0	0	0	0	0	0	0	0	0	8.16											51300
0	7145	hcd	573.26	2090.43	389.003	1067.13	1067.13	0	0	0	0	0	0	0	0	0	0	0	2.67											34600
0	7146	hcd	349.17	7181.84	149.023	0	0	0	0	0	0	0	0	0	0	0	0	0
0	7149	hcd	640.29	1695.59	389.048	910.81	910.81	0	0	0	0	0	0	0	0	0	0	0	2.2											33800
0	7150	hcd	435.71	1828.22	126.128	1823.11	1823.11	0	0	0	0	0	0	0	0	0	0	0	4.57											36700
0	7152	hcd	570.26	5097.59	569.342	0	0	0	0	0	0	0	0	0	0	0	0	0
0	7153	hcd	656.29	3892.82	388.993	0	0	0	0	0	0	0	0	0	0	0	0	0
0	7154	hcd	336.68	4199.18	224.064	1375.62	1375.62	0	0	0	0	0	0	0	0	0	0	0	4.12											33900
0	7157	hcd	649.26	1998.12	600.274	0	0	0	0	0	0	0	0	0	0	0	0	0
0	7158	hcd	538.42	10302.9	300.062	0	0	0	0	0	0	0	0	0	0	0	0	0
0	7159	hcd	550.46	6409.12	239.095	0	0	0	0	0	0	0	0	0	0	0	0	0
0	7163	hcd	465.23	10063.6	362.027	0	0	0	0	0	0	0	0	0	0	0	0	0
0	7164	hcd	388.53	574017	355.07	0	0	0	0	0	0	0	0	0	0	0	0	0
0	7165	hcd	503.64	1690.8	389.024	1205.42	1205.42	0	0	0	0	0	0	0	0	0	0	0	3.18											32700
0	7166	hcd	493.9	1931.85	414.58	1412.56	1412.56	0	0	0	0	0	0	0	0	0	0	0	3.5											34100
0	7169	hcd	588.9	13881.3	518.325	2220.82	2220.82	0	0	0	0	0	0	0	0	0	0	0	5.24											35700
0	7170	hcd	421.53	3660.13	126.128	3597.96	3597.96	0	0	0	0	0	0	0	0	0	0	0	10.35											48000
0	7171	hcd	582.29	13324.8	533.298	0	0	0	0	0	0	0	0	0	0	0	0	0
0	7172	hcd	780.99	1880.43	2221.91	0	0	0	0	0	0	0	0	0	0	0	0	0
0	7175	hcd	384.19	7907.08	268.132	829.44	829.44	0	0	0	0	0	0	0	0	0	0	0	2.46											35600
0	7176	hcd	405.52	6694.82	149.023	5589.18	5589.18	0	0	0	0	0	0	0	0	0	0	0	16.37											45702
0	7177	hcd	764.81	1971.23	715.817	0	0	0	0	0	0	0	0	0	0	0	0	0
0	7178	hcd	882.85	1689.23	1676.67	0	0	0	0	0	0	0	0	0	0	0	0	0
0	7181	hcd	601.55	3223.3	389.004	582.78	582.78	0	0	0	0	0	0	0	0	0	0	0	1.41											35800
0	7182	hcd	456.46	7743.79	126.128	7569.48	7569.48	0	447.32	0	0	0	0	0	0	0	0	0	21.12		1.21									47506		35400
0	7183	hcd	546.31	6134.91	476.306	1056.72	1056.72	0	0	0	0	0	0	0	0	0	0	0	2.74											34600
0	7184	hcd	625.3	5253.08	505.806	3629.13	3629.13	0	0	0	0	0	0	0	0	0	0	0	8.09											51800
0	7189	hcd	614.95	1476.33	1833.34	776.5	776.5	0	0	0	0	0	0	0	0	0	0	0	1.76											34600
0	7192	hcd	413.27	7781.81	413.265	3717.43	3717.43	0	0	0	0	0	0	0	0	0	0	0	10.65											49200
0	7193	hcd	422.52	6679.61	126.128	6674.46	6674.46	0	0	0	0	0	0	0	0	0	0	0	18.05											47102
0	7196	hcd	632.94	1340.48	1236.81	0	0	0	0	0	0	0	0	0	0	0	0	0
0	7199	hcd	381.25	12753.5	381.249	10870.3	10870.3	0	0	0	0	0	0	0	0	0	0	0	32.14											47902
0	7200	hcd	525.44	1226.28	126.128	1226.28	1226.28	0	0	0	0	0	0	0	0	0	0	0	2.93											34200
0	7203	hcd	551.91	6841.6	126.128	6744.45	6744.45	0	0	0	0	0	0	0	0	0	0	0	15.74											47802
0	7204	hcd	538.75	8843.01	248.18	4216.59	4216.59	0	0	0	0	0	0	0	0	0	0	0	10.29											42500
0	7205	hcd	527.21	1074.83	126.128	1052.23	1052.23	0	0	0	0	0	0	0	0	0	0	0	2.5											33600
0	7208	hcd	515.96	7205.41	426.478	6919.48	6919.48	0	0	0	0	0	0	0	0	0	0	0	17.43											47302
0	7211	hcd	478.9	8707.88	126.128	8570.14	8570.14	0	0	0	0	0	0	0	0	0	0	0	23.34											47902
0	7212	hcd	948.9	4765.07	900.415	0	0	0	0	0	0	0	0	0	0	0	0	0
0	7216	hcd	615.62	1801.9	389.046	746.66	746.66	0	0	0	0	0	0	0	0	0	0	0	1.66											36900
0	7217	hcd	628.63	2229.57	389.027	0	0	0	0	0	0	0	0	0	0	0	0	0
0	7218	hcd	693.28	1323.8	1188.11	0	0	0	0	0	0	0	0	0	0	0	0	0
0	7220	hcd	476.94	6227.79	358.528	4174.78	4174.78	0	0	0	0	0	0	0	0	0	0	0	11.07											45300
0	7221	hcd	565.78	1179.38	990.761	714.69	714.69	0	0	0	0	0	0	0	0	0	0	0	1.66											33300
0	7224	hcd	547.23	2027.61	389.023	1251.87	1251.87	0	0	0	0	0	0	0	0	0	0	0	3.09											34600
0	7225	hcd	529.95	1433.23	809.699	1170.26	1170.26	0	0	0	0	0	0	0	0	0	0	0	2.84											32600
0	7229	hcd	604.95	1448.28	1708.61	0	0	0	0	0	0	0	0	0	0	0	0	0
0	7230	hcd	562.23	2196.86	248.18	1178.29	1178.29	0	0	0	0	0	0	0	0	0	0	0	2.59											34700
0	7234	hcd	826.85	2231.64	389.025	0	0	0	0	0	0	0	0	0	0	0	0	0
0	7235	hcd	471.72	1536	126.128	1483.62	1483.62	0	0	0	0	0	0	0	0	0	0	0	4.2											33700
0	7236	hcd	682.95	2121.44	126.128	2026.41	2026.41	0	0	0	0	0	0	0	0	0	0	0	4.36											36000
0	7238	hcd	574.24	1700.51	320.68	1335.69	1335.69	0	0	0	0	0	0	0	0	0	0	0	3.28											35400
0	7239	hcd	405.87	7967.5	126.128	7946.26	7946.26	0	726.8	0	0	0	0	0	0	0	0	0	23.91		2.26									47606		34900
0	7240	hcd	584.49	1426.38	1837.94	780.48	780.48	0	0	0	0	0	0	0	0	0	0	0	1.9											36100
0	7243	hcd	427.94	9521.82	203.128	741.33	741.33	0	0	0	0	0	0	0	0	0	0	0	2.17											31000
0	7244	hcd	575.61	1392.8	774.385	0	0	0	0	0	0	0	0	0	0	0	0	0
0	7247	hcd	438.85	7009.99	304.162	1076.55	1076.55	0	0	0	0	0	0	0	0	0	0	0	2.88											34700
0	7250	hcd	506.23	11240.9	419.996	1050.86	1050.86	0	0	0	0	0	0	0	0	0	0	0	2.76											34900
0	7253	hcd	465.89	3241.39	361.026	0	0	0	0	0	0	0	0	0	0	0	0	0
0	7254	hcd	431.21	36288.5	248.181	13069	13069	0	667.91	0	0	0	0	0	0	0	0	0	34.4		1.83									48302		34100
0	7255	hcd	665.29	14520	616.299	0	0	0	0	0	0	0	0	0	0	0	0	0
0	7259	hcd	349.52	7890	149.023	6351.93	6351.93	0	0	0	0	0	0	0	0	0	0	0	19.52											47502
0	7262	hcd	397.71	9224.48	126.128	9118.81	9118.81	0	0	0	0	0	0	0	0	0	0	0	26.9											48602
0	7263	hcd	394.46	5886.12	150.026	5761.12	5761.12	0	632.93	0	0	0	0	0	0	0	0	0	15.6		1.7									47306		34600
0	7266	hcd	511.96	19764.8	126.128	19555.2	19555.2	0	794.86	0	0	0	0	0	0	0	0	0	48		1.96									49206		33600
0	7267	hcd	425.7	10306.6	328.687	3343.28	3343.28	0	0	0	0	0	0	0	0	0	0	0	8.91											46300
0	7270	hcd	563	1312.99	1189.32	750.11	750.11	0	0	0	0	0	0	0	0	0	0	0	1.77											38000
0	7273	hcd	583.17	1693.63	389.023	0	0	0	0	0	0	0	0	0	0	0	0	0
0	7274	hcd	574.89	2251.71	509.574	0	0	0	0	0	0	0	0	0	0	0	0	0
0	7275	hcd	423.21	3310.56	126.128	3303.18	3303.18	0	0	0	0	0	0	0	0	0	0	0	9.06											49300
0	7276	hcd	543.57	1176.55	1047.44	717.01	717.01	0	0	0	0	0	0	0	0	0	0	0	1.69											34600
0	7279	hcd	473.25	10697	126.128	10657.3	10657.3	0	0	0	0	0	0	0	0	0	0	0	28.06											47802
0	7280	hcd	687.95	1566.65	1930.2	0	0	0	0	0	0	0	0	0	0	0	0	0
0	7283	hcd	482.88	7997.81	330.19	3328.63	3328.63	0	0	0	0	0	0	0	0	0	0	0	9.06											49300
0	7284	hcd	489.71	1830.93	388.98	1180.57	1180.57	0	0	0	0	0	0	0	0	0	0	0	3.06											36300
0	7285	hcd	498.75	1667.49	785.393	0	0	0	0	0	0	0	0	0	0	0	0	0
0	7287	hcd	380.38	8179.01	126.128	8178.29	8178.29	0	0	0	0	0	0	0	0	0	0	0	23.69											47402
0	7288	hcd	638.63	1283.98	1254.68	841.69	841.69	0	0	0	0	0	0	0	0	0	0	0	1.94											35800
0	7291	hcd	409.97	3256.42	363.199	2985	2985	0	0	0	0	0	0	0	0	0	0	0	8.68											52000
0	7292	hcd	580.24	5962.81	320.68	1066.16	1066.16	0	0	0	0	0	0	0	0	0	0	0	2.64											35600
0	7296	hcd	553.75	4854.7	126.128	4828.81	4828.81	0	0	0	0	0	0	0	0	0	0	0	11.88											45600
0	7297	hcd	540.91	8715.39	459.757	4156.15	4156.15	0	0	0	0	0	0	0	0	0	0	0	10.05											44900
0	7298	hcd	670.75	1247.46	360.028	0	0	0	0	0	0	0	0	0	0	0	0	0
0	7301	hcd	468.91	3524.02	126.128	3492.62	3492.62	0	0	0	0	0	0	0	0	0	0	0	8.89											46600
0	7302	hcd	617.94	2076.5	388.962	0	0	0	0	0	0	0	0	0	0	0	0	0
0	7303	hcd	455.87	7104.05	384.874	6894.33	6894.33	0	0	0	0	0	0	0	0	0	0	0	18.04											47402
0	7306	hcd	486.56	1917.81	388.985	1404.29	1404.29	0	0	0	0	0	0	0	0	0	0	0	3.7											35500
0	7307	hcd	584.79	2016.27	388.957	0	0	0	0	0	0	0	0	0	0	0	0	0
0	7308	hcd	422.19	3859.3	126.128	3848.11	3848.11	0	0	0	0	0	0	0	0	0	0	0	10.36											44800
0	7311	hcd	610.95	19292.7	355.07	1487.91	1487.91	0	0	0	0	0	0	0	0	0	0	0	3.49											33300
0	7312	hcd	404.69	7480.14	299.062	6991.81	6991.81	0	0	0	0	0	0	0	0	0	0	0	19.7											47502
0	7313	hcd	717.67	1662.13	2067.07	0	0	0	0	0	0	0	0	0	0	0	0	0
0	7316	hcd	458.47	4313.26	126.128	4174.9	4174.9	0	0	0	0	0	0	0	0	0	0	0	11.36											46000
0	7317	hcd	611.29	16570.7	355.07	1406.71	1406.71	0	0	0	0	0	0	0	0	0	0	0	3.21											35700
0	7318	hcd	334.85	13550.2	223.063	6583.09	6583.09	0	0	0	0	0	0	0	0	0	0	0	19.94											47402
0	7325	hcd	617.61	2316.6	389.029	1002.08	1002.08	0	0	0	0	0	0	0	0	0	0	0	2.26											34500
0	7326	hcd	652.94	1633.05	1891.2	843.65	843.65	0	0	0	0	0	0	0	0	0	0	0	1.8											32300
0	7329	hcd	416.87	22040.6	337.54	15973	15973	0	0	0	0	0	0	0	0	0	0	0	44.47											49502
0	7330	hcd	485.71	2703.16	388.983	1267.92	1267.92	0	0	0	0	0	0	0	0	0	0	0	3.23											34200
0	7331	hcd	507.97	3300.86	126.128	3300.54	3300.54	0	0	0	0	0	0	0	0	0	0	0	8.33											49300
0	7336	hcd	532.75	12427.9	239.095	1678.77	1678.77	0	0	0	0	0	0	0	0	0	0	0	3.95											34400
0	7339	hcd	647.27	2275.16	389.002	1134.34	1134.34	0	0	0	0	0	0	0	0	0	0	0	2.65											35000
0	7340	hcd	583.57	1601.37	550.913	757.54	757.54	0	0	0	0	0	0	0	0	0	0	0	1.84											35100
0	7343	hcd	411.53	16222.9	332.209	8828.84	8828.84	0	0	0	0	0	0	0	0	0	0	0	24.77											47902
0	7344	hcd	523.25	8535.44	474.262	902.72	902.72	0	0	0	0	0	0	0	0	0	0	0	2.22											31300
0	7348	hcd	622.8	4155.83	503.808	883.24	883.24	0	0	0	0	0	0	0	0	0	0	0	2.06											33300
0	7349	hcd	656.27	2130.89	388.983	0	0	0	0	0	0	0	0	0	0	0	0	0
0	7350	hcd	488.76	1459.17	126.128	1432.3	1432.3	0	0	0	0	0	0	0	0	0	0	0	3.72											31900
0	7353	hcd	435.2	11906.9	298.174	7912.14	7912.14	0	592.88	0	0	0	0	0	0	0	0	0	22.26		1.71									47302		33700
0	7354	hcd	338.18	6465.56	304.889	5008.43	5008.43	0	0	0	0	0	0	0	0	0	0	0	15.69											46002
0	7356	hcd	635.58	4848.48	543.605	2183	2183	0	0	0	0	0	0	0	0	0	0	0	4.95											36000
0	7357	hcd	400.55	4688.93	126.127	4685.73	4685.73	0	0	0	0	0	0	0	0	0	0	0	13.07											45700
0	7359	hcd	587.82	45453	517.824	13564.1	13564.1	0	0	0	0	0	0	0	0	0	0	0	30.56											48102
0	7360	hcd	651.79	6555.68	571.293	1713.36	1713.36	0	0	0	0	0	0	0	0	0	0	0	4.02											32700
0	7361	hcd	438.18	15584.3	441.22	3911.11	3911.11	0	0	0	0	0	0	0	0	0	0	0	10.41											46200
0	7363	hcd	364.54	29360.5	126.128	29083.1	29083.1	0	821.32	0	0	0	0	0	0	0	0	0	56.93		1.61									49302		34000
0	7364	hcd	929.37	1689.58	1328.35	0	0	0	0	0	0	0	0	0	0	0	0	0
0	7366	hcd	359.87	63576.7	126.128	62569.6	62569.6	0	1389.96	0	0	0	0	0	0	0	0	0	89.54		1.96									49902		32700
0	7367	hcd	479.48	4323.95	126.128	4323.65	4323.65	0	0	0	0	0	0	0	0	0	0	0	11.68											45800
0	7368	hcd	701.63	1693.38	1842.99	0	0	0	0	0	0	0	0	0	0	0	0	0
0	7371	hcd	482.98	3747.99	403.223	3141.98	3141.98	0	0	0	0	0	0	0	0	0	0	0	8.1											51400
0	7374	hcd	406.46	5970.34	126.128	5969.44	5969.44	0	0	0	0	0	0	0	0	0	0	0	17.74											46702
0	7375	hcd	596.75	8594.9	498.771	0	0	0	0	0	0	0	0	0	0	0	0	0
0	7376	hcd	412.72	17488.3	363.732	14868	14868	0	0	0	0	0	0	0	0	0	0	0	40.76											48902
0	7379	hcd	398.17	27472.5	332.849	5457.23	5457.23	0	544.84	0	0	0	0	0	0	0	0	0	16.36		1.66									46406		33200
0	7380	hcd	583.91	1556.42	416.716	673.19	673.19	0	0	0	0	0	0	0	0	0	0	0	1.57											31500
0	7383	hcd	435.43	10567.2	298.174	5033.97	5033.97	0	0	0	0	0	0	0	0	0	0	0	14.09											47000
0	7384	hcd	683.8	5760.54	564.308	1773.52	1773.52	0	0	0	0	0	0	0	0	0	0	0	3.83											34400
0	7385	hcd	1051.95	2146.05	1809.86	0	0	0	0	0	0	0	0	0	0	0	0	0
0	7388	hcd	568.25	4285.46	949.419	0	0	0	0	0	0	0	0	0	0	0	0	0
0	7391	hcd	450.5	4432.25	379.542	3146.7	3146.7	0	0	0	0	0	0	0	0	0	0	0	8.64											49500
0	7392	hcd	582.5	1907.36	388.938	0	0	0	0	0	0	0	0	0	0	0	0	0
0	7393	hcd	707.31	3691.73	718.347	0	0	0	0	0	0	0	0	0	0	0	0	0
0	7396	hcd	392.22	765004	466.277	735645	735645	0	13218.5	0	0	0	0	0	0	0	0	0	76.87		1.37									49402		32800
0	7399	hcd	450.54	7271.53	126.128	7225.45	7225.45	0	486.37	0	0	0	0	0	0	0	0	0	19.58		1.32									47306		34100
0	7403	hcd	433.44	4953.85	210.95	1373.78	1373.78	0	0	0	0	0	0	0	0	0	0	0	3.86											34000
0	7404	hcd	643.64	1693.08	1574.87	0	0	0	0	0	0	0	0	0	0	0	0	0
0	7405	hcd	352.84	4431.99	175.119	743.02	743.02	0	0	0	0	0	0	0	0	0	0	0	2.28											34900
0	7406	hcd	403.32	13889.4	185.081	3540.36	3540.36	0	0	0	0	0	0	0	0	0	0	0	9.86											48500
0	7408	hcd	452.95	3019	126.128	2955.72	2955.72	0	0	0	0	0	0	0	0	0	0	0	7.85											49300
0	7413	hcd	491.14	1294.98	697.413	1122.17	1122.17	0	0	0	0	0	0	0	0	0	0	0	2.88											36800
0	7414	hcd	554.75	1230.43	959.389	851.47	851.47	0	0	0	0	0	0	0	0	0	0	0	2.14											33600
0	7417	hcd	349.17	6770.15	149.023	412.64	412.64	0	0	0	0	0	0	0	0	0	0	0	1.28											36200
0	7418	hcd	648.79	2332.2	246.156	0	0	0	0	0	0	0	0	0	0	0	0	0
0	7419	hcd	615.25	1675.01	388.968	0	0	0	0	0	0	0	0	0	0	0	0	0
0	7420	hcd	639.3	1396.06	1543.89	1205.25	1205.25	0	0	0	0	0	0	0	0	0	0	0	2.67											31500
0	7424	hcd	570.59	1632.71	388.941	0	0	0	0	0	0	0	0	0	0	0	0	0
0	7425	hcd	497.96	2062.03	126.128	2054.73	2054.73	0	0	0	0	0	0	0	0	0	0	0	5.29											35500
0	7429	hcd	395.85	6238.3	336.533	1120.33	1120.33	0	0	0	0	0	0	0	0	0	0	0	3.2											35700
0	7430	hcd	415.53	6900.74	126.128	6789.59	6789.59	0	0	0	0	0	0	0	0	0	0	0	19.69											47002
0	7431	hcd	434.21	5907.49	126.128	5746.32	5746.32	0	0	0	0	0	0	0	0	0	0	0	15.86											46602
0	7432	hcd	316.16	17009.2	299.062	545.7	545.7	0	0	0	0	0	0	0	0	0	0	0	1.73											33600
0	7437	hcd	493.57	55559.8	414.245	35604.3	35604.3	0	0	0	0	0	0	0	0	0	0	0	62.84											49402
0	7438	hcd	570.26	1455.55	388.983	0	0	0	0	0	0	0	0	0	0	0	0	0
0	7439	hcd	560.29	5950.9	490.293	799.43	799.43	0	0	0	0	0	0	0	0	0	0	0	1.96											32000
0	7442	hcd	573.28	6137.05	729.363	3463.16	3463.16	0	0	0	0	0	0	0	0	0	0	0	8.58											51200
0	7443	hcd	422.56	3377.5	388.942	3094.39	3094.39	0	0	0	0	0	0	0	0	0	0	0	8.61											49300
0	7444	hcd	425.87	5163.99	126.128	5138.14	5138.14	0	0	0	0	0	0	0	0	0	0	0	13.93											45900
0	7447	hcd	675.8	1873.95	126.128	1872.66	1872.66	0	0	0	0	0	0	0	0	0	0	0	3.96											34500
0	7450	hcd	465.87	4568.64	126.128	4482.64	4482.64	0	0	0	0	0	0	0	0	0	0	0	12.21											45600
0	7451	hcd	404.95	2811.86	149.023	1777.55	1777.55	0	0	0	0	0	0	0	0	0	0	0	4.93											34800
0	7452	hcd	437.13	3224.26	126.128	3104.4	3104.4	0	0	0	0	0	0	0	0	0	0	0	8.85											49800
0	7453	hcd	503.64	1374.91	126.127	1374.49	1374.49	0	0	0	0	0	0	0	0	0	0	0	3.38											35500
0	7456	hcd	577.78	7415.91	507.779	4246.35	4246.35	0	0	0	0	0	0	0	0	0	0	0	10.16											44900
0	7462	hcd	381.72	26102.3	126.128	25600.9	25600.9	0	613.46	0	0	0	0	0	0	0	0	0	72.4		1.74									49802		34400
0	7463	hcd	430.21	16262.9	347.203	6488.46	6488.46	0	0	0	0	0	0	0	0	0	0	0	17.74											47002
0	7466	hcd	625.74	1887.52	388.962	0	0	0	0	0	0	0	0	0	0	0	0	0
0	7467	hcd	385.52	41499.1	299.062	12193	12193	0	0	0	0	0	0	0	0	0	0	0	35.03											48402
0	7470	hcd	525.73	1268.78	1918.03	550.07	550.07	0	0	0	0	0	0	0	0	0	0	0	1.35											33800
0	7472	hcd	551.91	1834.77	486.585	1331.3	1331.3	0	0	0	0	0	0	0	0	0	0	0	3.2											34100
0	7473	hcd	498.93	1521.95	126.128	1518.2	1518.2	0	0	0	0	0	0	0	0	0	0	0	3.95											33900
0	7474	hcd	613.61	1898.62	438.72	0	0	0	0	0	0	0	0	0	0	0	0	0
0	7476	hcd	538.75	16731.4	248.18	7432.96	7432.96	0	0	0	0	0	0	0	0	0	0	0	18.59											46802
0	7478	hcd	515.96	5723.63	126.128	5698.55	5698.55	0	0	0	0	0	0	0	0	0	0	0	14.65											46600
0	7479	hcd	647.94	4369.62	126.128	4336.1	4336.1	0	0	0	0	0	0	0	0	0	0	0	9.38											45800
0	7480	hcd	439.95	18110.1	439.844	4828.9	4828.9	0	0	0	0	0	0	0	0	0	0	0	12.81											46200
0	7483	hcd	633.97	2057.42	388.933	0	0	0	0	0	0	0	0	0	0	0	0	0
0	7484	hcd	524.98	2388.92	388.898	1657.21	1657.21	0	0	0	0	0	0	0	0	0	0	0	4.15											34000
0	7485	hcd	410.13	5125.51	308.173	1694.22	1694.22	0	0	0	0	0	0	0	0	0	0	0	4.68											34400
0	7488	hcd	628.63	5261.9	126.128	5250.9	5250.9	0	0	0	0	0	0	0	0	0	0	0	11.53											45100
0	7490	hcd	476.94	11133.1	387.452	3691.91	3691.91	0	0	0	0	0	0	0	0	0	0	0	9.3											46300
0	7494	hcd	405.94	4792.11	126.128	4725.6	4725.6	0	0	0	0	0	0	0	0	0	0	0	14.34											46300
0	7495	hcd	435.71	3909.2	175.119	3496.64	3496.64	0	0	0	0	0	0	0	0	0	0	0	9.4											46800
0	7498	hcd	547.56	4091.34	126.128	4090.63	4090.63	0	0	0	0	0	0	0	0	0	0	0	10.06											47300
0	7505	hcd	471.72	9100.01	458.272	7982.78	7982.78	0	0	0	0	0	0	0	0	0	0	0	20.37											47302
0	7511	hcd	420.32	32747.5	149.023	3990.17	3990.17	0	0	0	0	0	0	0	0	0	0	0	11.47											46204
0	7512	hcd	682.61	4812.38	584.636	1371.03	1371.03	0	0	0	0	0	0	0	0	0	0	0	2.9											35700
0	7513	hcd	378.17	4415.34	223.064	1200.09	1200.09	0	0	0	0	0	0	0	0	0	0	0	3.43											34300
0	7519	hcd	432.89	5778.13	210.95	1507.34	1507.34	0	0	0	0	0	0	0	0	0	0	0	4.37											34800
0	7520	hcd	312.68	36473	240.095	9764.42	9764.42	0	415.31	0	0	0	0	0	0	0	0	0	31.24		1.32									47806		35300
0	7521	hcd	309.17	53371.2	308.9	17324.2	17324.2	0	0	0	0	0	0	0	0	0	0	0	56.33											49202
0	7525	hcd	541.24	7374.26	126.128	7313.71	7313.71	0	0	0	0	0	0	0	0	0	0	0	17.84											46802
0	7526	hcd	398.75	12128.9	333.183	985.33	985.33	0	0	0	0	0	0	0	0	0	0	0	2.74											34000
0	7529	hcd	619.59	5802.52	554.273	0	0	0	0	0	0	0	0	0	0	0	0	0
0	7530	hcd	671.62	1604.01	1667.09	1412.1	1412.1	0	0	0	0	0	0	0	0	0	0	0	2.95											35900
0	7533	hcd	511.96	18107	438.727	11376.1	11376.1	0	0	0	0	0	0	0	0	0	0	0	28.92											48402
0	7534	hcd	503.97	6284.21	434.989	5811.2	5811.2	0	0	0	0	0	0	0	0	0	0	0	15.8											46802
0	7535	hcd	385.15	51035.3	299.062	5224.7	5224.7	0	0	0	0	0	0	0	0	0	0	0	14.38											46502
0	7538	hcd	619.26	5913.8	548.264	769.13	769.13	0	0	0	0	0	0	0	0	0	0	0	1.77											34000
0	7539	hcd	441.42	3909.16	440.845	1805.16	1805.16	0	0	0	0	0	0	0	0	0	0	0	4.65											34300
0	7542	hcd	397.46	10352.7	126.128	10217.4	10217.4	0	0	0	0	0	0	0	0	0	0	0	29.11											48702
0	7543	hcd	684.2	8157.49	359.029	0	0	0	0	0	0	0	0	0	0	0	0	0
0	7545	hcd	543.57	4462.73	126.128	4427.39	4427.39	0	0	0	0	0	0	0	0	0	0	0	11.03											43900
0	7546	hcd	426.2	10094.5	346.873	8342.99	8342.99	0	0	0	0	0	0	0	0	0	0	0	23.56											47302
0	7547	hcd	530.24	1774.96	388.933	966.62	966.62	0	0	0	0	0	0	0	0	0	0	0	2.49											34700
0	7548	hcd	550.22	8693.54	239.095	0	0	0	0	0	0	0	0	0	0	0	0	0
0	7553	hcd	463.24	77980.7	360.029	35948.6	35948.6	0	593.55	0	0	0	0	0	0	0	0	0	91.19		1.56									49702		34900
0	7554	hcd	653.79	3407.82	388.917	882.75	882.75	0	0	0	0	0	0	0	0	0	0	0	1.94											36200
0	7555	hcd	487.72	9638.04	424.25	5887.53	5887.53	0	0	0	0	0	0	0	0	0	0	0	15.62											45102
0	7556	hcd	626.8	20527.5	626.801	17461.6	17461.6	0	577.91	0	0	0	0	0	0	0	0	0	38.82		1.3									48806		32200
0	7557	hcd	721.65	1421.1	1123.35	1405.1	1405.1	0	0	0	0	0	0	0	0	0	0	0	2.87											33600
0	7560	hcd	559.6	3136.82	388.924	1325.29	1325.29	0	0	0	0	0	0	0	0	0	0	0	3.21											34600
0	7561	hcd	721.98	2205.38	688.985	2059.19	2059.19	0	0	0	0	0	0	0	0	0	0	0	4.32											34600
0	7562	hcd	436.53	7160.64	126.128	7118.88	7118.88	0	0	0	0	0	0	0	0	0	0	0	19.52											47302
0	7563	hcd	564.25	1146.58	126.128	1145.33	1145.33	0	0	0	0	0	0	0	0	0	0	0	2.67											35700
0	7565	hcd	580.24	5671.18	320.68	750.08	750.08	0	0	0	0	0	0	0	0	0	0	0	1.83											34800
0	7566	hcd	630.25	1626.91	1912.73	755.58	755.58	0	0	0	0	0	0	0	0	0	0	0	1.68											35600
0	7570	hcd	336.93	3392.77	336.895	1181.5	1181.5	0	0	0	0	0	0	0	0	0	0	0	3.77											33500
0	7571	hcd	323.22	20926.7	323.225	11743.4	11743.4	0	0	0	0	0	0	0	0	0	0	0	36.21											48702
0	7573	hcd	455.87	16606.8	384.873	10767.9	10767.9	0	0	0	0	0	0	0	0	0	0	0	30.24											48002
0	7574	hcd	468.91	7513.78	126.128	7502.37	7502.37	0	0	0	0	0	0	0	0	0	0	0	19.81											47302
0	7575	hcd	687.95	1679.98	1940.62	1244.26	1244.26	0	0	0	0	0	0	0	0	0	0	0	2.61											35800
0	7579	hcd	450.29	8493.35	450.289	6486.81	6486.81	0	0	0	0	0	0	0	0	0	0	0	17.25											46202
0	7582	hcd	536.56	46173.3	299.062	6141.35	6141.35	0	0	0	0	0	0	0	0	0	0	0	15.5											47002
0	7583	hcd	407.75	9286.38	149.023	3048.25	3048.25	0	0	0	0	0	0	0	0	0	0	0	8.67											49200
0	7586	hcd	580.61	4225.54	388.896	1328.82	1328.82	0	0	0	0	0	0	0	0	0	0	0	3.3											35300
0	7587	hcd	421.18	3418.8	304.161	1790.69	1790.69	0	0	0	0	0	0	0	0	0	0	0	4.94											35000
0	7594	hcd	425.45	2749.06	328.687	1750.07	1750.07	0	0	0	0	0	0	0	0	0	0	0	4.94											36100
0	7595	hcd	489.96	1675.41	126.128	1645.23	1645.23	0	0	0	0	0	0	0	0	0	0	0	4.33											35400
0	7598	hcd	485.71	5308.34	604.288	3986.02	3986.02	0	0	0	0	0	0	0	0	0	0	0	10.47											45300
0	7599	hcd	409.77	7226.79	149.024	2924.39	2924.39	0	0	0	0	0	0	0	0	0	0	0	8.37											51800
0	7600	hcd	416.87	21380.4	126.128	21347.3	21347.3	0	0	0	0	0	0	0	0	0	0	0	58.89											48702
0	7607	hcd	557.27	2204.68	487.269	784.52	784.52	0	0	0	0	0	0	0	0	0	0	0	1.84											34700
0	7608	hcd	486.99	5571.07	304.684	5126.74	5126.74	0	0	0	0	0	0	0	0	0	0	0	13.08											45300
0	7613	hcd	480.76	33781.5	126.128	33527.6	33527.6	0	560.41	0	0	0	0	0	0	0	0	0	90.7		1.5									49502		33900
0	7614	hcd	402.68	8076.59	225.043	6415.56	6415.56	0	0	0	0	0	0	0	0	0	0	0	17.37											47102
0	7618	hcd	380.39	3844.91	126.128	3836.38	3836.38	0	0	0	0	0	0	0	0	0	0	0	10.85											45800
0	7621	hcd	488.96	1429.28	1832.74	1203.69	1203.69	0	0	0	0	0	0	0	0	0	0	0	3.14											34700
0	7622	hcd	570.22	17255.3	326.188	0	0	0	0	0	0	0	0	0	0	0	0	0
0	7624	hcd	635.58	6987.74	522.273	1576.97	1576.97	0	0	0	0	0	0	0	0	0	0	0	3.5											36900
0	7626	hcd	587.82	25686.1	517.824	9155.71	9155.71	0	0	0	0	0	0	0	0	0	0	0	20.69											48002
0	7629	hcd	364.54	22980.7	126.128	22774.7	22774.7	0	1457.91	0	0	0	0	0	0	0	0	0	70.85		4.53									49706		33900
0	7630	hcd	413.27	7562.38	413.266	5287.57	5287.57	0	0	0	0	0	0	0	0	0	0	0	15.71											46300
0	7631	hcd	624.24	4219.04	239.095	0	0	0	0	0	0	0	0	0	0	0	0	0
0	7633	hcd	359.87	37393.3	126.128	37393.3	37393.3	0	0	0	0	0	0	0	0	0	0	0	90.99											49602
0	7634	hcd	479.48	13177.5	458.272	10829.3	10829.3	0	0	0	0	0	0	0	0	0	0	0	27.65											48002
0	7637	hcd	482.73	16943.7	472.288	11989.4	11989.4	0	0	0	0	0	0	0	0	0	0	0	30.99											48802
0	7638	hcd	404.73	15952.3	126.128	15926.7	15926.7	0	985.86	0	0	0	0	0	0	0	0	0	44.75		2.83									48706		34700
0	7642	hcd	473.25	9574.34	126.128	9462.06	9462.06	0	0	0	0	0	0	0	0	0	0	0	25.57											47506
0	7643	hcd	410.72	17981.4	126.128	17928.1	17928.1	0	0	0	0	0	0	0	0	0	0	0	52.1											48802
0	7644	hcd	662.64	1521.49	1470.51	0	0	0	0	0	0	0	0	0	0	0	0	0
0	7650	hcd	472.94	9205.14	423.742	6940.17	6940.17	0	662.91	0	0	0	0	0	0	0	0	0	18.75		1.78									47906		34100
0	7651	hcd	497.57	2672.94	388.906	2059.55	2059.55	0	0	0	0	0	0	0	0	0	0	0	5.28											36800
0	7652	hcd	336.15	4436.64	302.911	1110.57	1110.57	0	0	0	0	0	0	0	0	0	0	0	3.43											34400
0	7656	hcd	465.22	11199.4	362.026	4674.55	4674.55	0	0	0	0	0	0	0	0	0	0	0	12.11											45500
0	7658	hcd	582.5	1358.97	388.923	875.07	875.07	0	0	0	0	0	0	0	0	0	0	0	2.06											36800
0	7659	hcd	560.27	3844.46	126.127	3828.63	3828.63	0	0	0	0	0	0	0	0	0	0	0	9.24											47500
0	7662	hcd	392.22	463357	126.128	460377	460377	0	0	0	0	0	0	0	0	0	0	0	67.53											49302
0	7665	hcd	509.19	1870.26	126.128	1852.86	1852.86	0	0	0	0	0	0	0	0	0	0	0	4.58											34600
0	7669	hcd	509.44	4231.7	126.128	4221.59	4221.59	0	0	0	0	0	0	0	0	0	0	0	10.94											45200
0	7670	hcd	490.23	9310.8	126.128	9281.81	9281.81	0	0	0	0	0	0	0	0	0	0	0	23.25											48502
0	7672	hcd	453.2	6271.06	126.128	6256.78	6256.78	0	0	0	0	0	0	0	0	0	0	0	16.95											46802
0	7673	hcd	643.3	24422.5	126.128	24364.4	24364.4	0	0	0	0	0	0	0	0	0	0	0	52.07											49002
0	7676	hcd	507.16	6273.62	420.994	1149.92	1149.92	0	0	0	0	0	0	0	0	0	0	0	3.14											33400
0	7677	hcd	617.61	1590.1	1840.45	1358.81	1358.81	0	0	0	0	0	0	0	0	0	0	0	2.83											34900
0	7681	hcd	407.95	13847.8	149.023	5264.24	5264.24	0	0	0	0	0	0	0	0	0	0	0	15.32											46202
0	7684	hcd	638.97	6185.01	126.128	6184.44	6184.44	0	0	0	0	0	0	0	0	0	0	0	13.29											46000
0	7685	hcd	501.25	1915.11	126.128	1876.38	1876.38	0	0	0	0	0	0	0	0	0	0	0	4.57											35300
0	7689	hcd	495.96	7798.99	495.832	3327.16	3327.16	0	0	0	0	0	0	0	0	0	0	0	8.2											49700
0	7692	hcd	700.3	2119.02	634.651	0	0	0	0	0	0	0	0	0	0	0	0	0
0	7699	hcd	415.53	5468.55	126.128	5393.99	5393.99	0	0	0	0	0	0	0	0	0	0	0	15.41											47202
0	7700	hcd	349.16	6265.29	149.024	3865.49	3865.49	0	0	0	0	0	0	0	0	0	0	0	11.26											46200
0	7702	hcd	493.57	57686.9	414.245	32191.5	32191.5	0	0	0	0	0	0	0	0	0	0	0	65.14											49802
0	7705	hcd	573.28	111785	540.623	59927.5	59927.5	0	1404.47	0	0	0	0	0	0	0	0	0	57.66		1.35									49502		35300
0	7706	hcd	438.11	4761.98	126.127	4754.16	4754.16	0	0	0	0	0	0	0	0	0	0	0	12.01											45100
0	7709	hcd	524.21	3984.74	475.219	2078.12	2078.12	0	0	0	0	0	0	0	0	0	0	0	4.97											36400
0	7712	hcd	526.74	1635.6	438.228	1250.9	1250.9	0	0	0	0	0	0	0	0	0	0	0	3.16											34100
0	7713	hcd	377.52	5614.7	149.023	3023.9	3023.9	0	0	0	0	0	0	0	0	0	0	0	9.05											47100
0	7716	hcd	437.13	6113.22	126.128	6046.25	6046.25	0	0	0	0	0	0	0	0	0	0	0	16.6											47002
0	7717	hcd	499.58	11226.3	272.171	8662.68	8662.68	0	0	0	0	0	0	0	0	0	0	0	23											47602
0	7718	hcd	376.52	8246.93	126.128	8165.71	8165.71	0	0	0	0	0	0	0	0	0	0	0	24.78											47702
0	7719	hcd	700.64	1819.07	1858.74	0	0	0	0	0	0	0	0	0	0	0	0	0
0	7722	hcd	523.24	18295.3	404.251	3723.88	3723.88	0	0	0	0	0	0	0	0	0	0	0	9.31											46000
0	7723	hcd	378.2	6782.25	126.128	6771.69	6771.69	0	0	0	0	0	0	0	0	0	0	0	19.4											47102
0	7726	hcd	430.21	23637.6	347.203	11758.2	11758.2	0	825.21	0	0	0	0	0	0	0	0	0	32.56		2.35									48406		35300
0	7727	hcd	565.25	6118.64	516.283	1700.12	1700.12	0	0	0	0	0	0	0	0	0	0	0	4											35300
0	7728	hcd	651.04	1741.2	2193.8	765.98	765.98	0	0	0	0	0	0	0	0	0	0	0	1.64											35200
0	7732	hcd	567.74	5357.12	235.119	0	0	0	0	0	0	0	0	0	0	0	0	0
0	7733	hcd	467.25	7028.82	126.128	7019.93	7019.93	0	0	0	0	0	0	0	0	0	0	0	17.57											47602
0	7736	hcd	454.38	1668.26	126.127	1668.12	1668.12	0	0	0	0	0	0	0	0	0	0	0	4.69											33700
0	7737	hcd	396.97	8808.1	126.128	8785.71	8785.71	0	0	0	0	0	0	0	0	0	0	0	25.61											47502
0	7740	hcd	516.21	8144.09	126.128	8115.94	8115.94	0	0	0	0	0	0	0	0	0	0	0	20.73											47002
0	7741	hcd	539	17478.3	248.181	6916.54	6916.54	0	0	0	0	0	0	0	0	0	0	0	16.85											46402
0	7742	hcd	538.5	11899.7	299.062	5272.87	5272.87	0	0	0	0	0	0	0	0	0	0	0	12.85											46500
0	7743	hcd	630.92	2081.67	532.605	1323.9	1323.9	0	0	0	0	0	0	0	0	0	0	0	3.01											34600
0	7744	hcd	489.27	7094.99	126.128	7090.87	7090.87	0	0	0	0	0	0	0	0	0	0	0	17.9											46502
0	7746	hcd	647.28	2016.6	388.858	1651.04	1651.04	0	0	0	0	0	0	0	0	0	0	0	3.7											35700
0	7747	hcd	327.01	47877.5	174.992	33913.1	33913.1	0	3110.26	0	0	0	0	0	0	0	0	0	99.59		9.64									49606		45800
0	7748	hcd	558.77	3807.51	388.843	0	0	0	0	0	0	0	0	0	0	0	0	0
0	7749	hcd	379.16	7028.79	126.128	6999.11	6999.11	0	552.44	0	0	0	0	0	0	0	0	0	19.84		1.63									46906		31300
0	7752	hcd	628.63	2252.14	126.128	2197.01	2197.01	0	0	0	0	0	0	0	0	0	0	0	5.09											35800
0	7753	hcd	453.23	22310.5	126.128	22287	22287	0	751.22	0	0	0	0	0	0	0	0	0	59.67		2.05									49206		33400
0	7757	hcd	449.11	13257.5	363.022	4099	4099	0	0	0	0	0	0	0	0	0	0	0	11.03											44700
0	7758	hcd	653.3	7213.17	555.326	2487.55	2487.55	0	0	0	0	0	0	0	0	0	0	0	5.43											36100
0	7759	hcd	351.49	8250.98	346.167	4054.85	4054.85	0	0	0	0	0	0	0	0	0	0	0	12.31											45900
0	7762	hcd	547.23	6813.41	126.128	6769.46	6769.46	0	582.62	0	0	0	0	0	0	0	0	0	16		1.36									47006		35300
0	7763	hcd	464.14	44750.7	361.025	5132.66	5132.66	0	0	0	0	0	0	0	0	0	0	0	13.18											45500
0	7769	hcd	402.23	13252.7	225.043	11924.6	11924.6	0	0	0	0	0	0	0	0	0	0	0	34.99											49102
0	7770	hcd	576.58	1411.77	388.903	0	0	0	0	0	0	0	0	0	0	0	0	0
0	7771	hcd	435.87	38852.8	364.878	31151.6	31151.6	0	562.3	0	0	0	0	0	0	0	0	0	81.06		1.48									49502		35200
0	7773	hcd	471.97	9581.06	458.272	7130.65	7130.65	0	0	0	0	0	0	0	0	0	0	0	19.17											48402
0	7774	hcd	645.91	1731.92	553.938	0	0	0	0	0	0	0	0	0	0	0	0	0
0	7775	hcd	748.87	2160.41	272.172	933.11	933.11	0	0	0	0	0	0	0	0	0	0	0	1.85											35300
0	7778	hcd	352.52	6189.12	365.701	1612.53	1612.53	0	0	0	0	0	0	0	0	0	0	0	5.08											35200
0	7779	hcd	503.39	4365.39	299.061	3390.18	3390.18	0	0	0	0	0	0	0	0	0	0	0	8.53											46300
0	7782	hcd	682.28	2094.71	388.817	1371.82	1371.82	0	0	0	0	0	0	0	0	0	0	0	3.04											34800
0	7783	hcd	409.87	9313.94	126.128	9297.27	9297.27	0	0	0	0	0	0	0	0	0	0	0	25.05											48102
0	7784	hcd	438.36	4844.28	126.128	4844.27	4844.27	0	0	0	0	0	0	0	0	0	0	0	12.77											46400
0	7787	hcd	423.21	3831.21	126.128	3727.94	3727.94	0	0	0	0	0	0	0	0	0	0	0	10.37											46300
0	7790	hcd	551.58	3813.12	576.782	1480.86	1480.86	0	0	0	0	0	0	0	0	0	0	0	3.62											36000
0	7791	hcd	380.93	10807.4	126.128	10778.5	10778.5	0	0	0	0	0	0	0	0	0	0	0	30											48202
0	7793	hcd	541.49	6075.66	126.128	6040.47	6040.47	0	0	0	0	0	0	0	0	0	0	0	14.26											46200
0	7796	hcd	580.27	12801.2	531.283	1552.07	1552.07	0	0	0	0	0	0	0	0	0	0	0	3.9											33600
0	7797	hcd	489.16	7827.64	440.277	1758.53	1758.53	0	0	0	0	0	0	0	0	0	0	0	4.52											35000
0	7800	hcd	512.21	19884.4	438.729	14242.9	14242.9	0	0	0	0	0	0	0	0	0	0	0	35.02											48606
0	7801	hcd	505.09	27119.2	418.995	3617.79	3617.79	0	0	0	0	0	0	0	0	0	0	0	9.57											45400
0	7802	hcd	450.52	5523.86	126.128	5520.9	5520.9	0	0	0	0	0	0	0	0	0	0	0	14.17											45602
0	7806	hcd	399.72	2585.51	388.917	1442.18	1442.18	0	0	0	0	0	0	0	0	0	0	0	4.2											35900
0	7807	hcd	902.11	1611.98	1108.55	0	0	0	0	0	0	0	0	0	0	0	0	0
0	7810	hcd	528.28	3803.04	365.701	0	0	0	0	0	0	0	0	0	0	0	0	0
0	7811	hcd	336.84	5278.01	412.248	3132.44	3132.44	0	0	0	0	0	0	0	0	0	0	0	9.35											47300
0	7812	hcd	349.17	7685.29	175.119	2865.61	2865.61	0	0	0	0	0	0	0	0	0	0	0	8.75											52800
0	7814	hcd	543.57	3469.84	431.918	3332.87	3332.87	0	0	0	0	0	0	0	0	0	0	0	8.13											49200
0	7818	hcd	381.27	15547.2	126.128	15486.7	15486.7	0	0	0	0	0	0	0	0	0	0	0	43.36											49102
0	7823	hcd	476.94	23852	248.18	15143.8	15143.8	0	0	0	0	0	0	0	0	0	0	0	38.86											49302
0	7824	hcd	466.98	3395.45	466.767	1338.84	1338.84	0	0	0	0	0	0	0	0	0	0	0	3.69											34100
0	7825	hcd	682.95	1879.61	126.128	1842.25	1842.25	0	0	0	0	0	0	0	0	0	0	0	3.87											32800
0	7828	hcd	706.3	1878.3	388.834	0	0	0	0	0	0	0	0	0	0	0	0	0
0	7829	hcd	321.54	31236.5	149.023	4800.73	4800.73	0	0	0	0	0	0	0	0	0	0	0	14.65											45802
0	7832	hcd	671.02	1507.19	872.715	0	0	0	0	0	0	0	0	0	0	0	0	0
0	7837	hcd	749.37	1571.56	1369.43	1374.26	1374.26	0	0	0	0	0	0	0	0	0	0	0	2.62											35700
0	7839	hcd	468.91	5354.94	126.128	5337.73	5337.73	0	0	0	0	0	0	0	0	0	0	0	13.76											45700
0	7840	hcd	466.88	3415.22	433.882	1741.01	1741.01	0	0	0	0	0	0	0	0	0	0	0	4.68											35200
0	7843	hcd	456.2	7286.64	126.128	7219.05	7219.05	0	0	0	0	0	0	0	0	0	0	0	20.12											47202
0	7844	hcd	362.22	11999.1	126.128	11877.6	11877.6	0	0	0	0	0	0	0	0	0	0	0	35.5											48502
0	7845	hcd	465.56	9489.77	362.025	4778.75	4778.75	0	554.84	0	0	0	0	0	0	0	0	0	12.16		1.43									45504		33200
0	7847	hcd	536.57	48005.9	299.062	3947.79	3947.79	0	0	0	0	0	0	0	0	0	0	0	9.57											46300
0	7853	hcd	547.9	4906.92	126.128	4798.07	4798.07	536.08	725.35	0	0	0	0	0	0	0	0	0	12.06	1.33	1.79									46804	31500	35000
0	7856	hcd	432.89	5001.97	210.95	3380.68	3380.68	0	0	0	0	0	0	0	0	0	0	0	9.54											46400
0	7857	hcd	439.87	22369	439.844	5161.47	5161.47	0	0	0	0	0	0	0	0	0	0	0	14.14											46100
0	7860	hcd	523.25	6211.45	453.251	1182.68	1182.68	0	0	0	0	0	0	0	0	0	0	0	2.96											33700
0	7861	hcd	465.9	11199.4	126.128	11196.9	11196.9	0	0	0	0	0	0	0	0	0	0	0	28.63											48202
0	7864	hcd	486.21	5796.69	126.128	5748.73	5748.73	0	0	0	0	0	0	0	0	0	0	0	14.89											46402
0	7866	hcd	416.87	9857.32	126.128	9817.57	9817.57	0	0	0	0	0	0	0	0	0	0	0	27.21											48302
0	7869	hcd	409.77	4449.4	149.023	4040.37	4040.37	0	0	0	0	0	0	0	0	0	0	0	11.75											46200
0	7870	hcd	580.95	4236.12	531.284	1252.01	1252.01	0	0	0	0	0	0	0	0	0	0	0	3.06											33100
0	7872	hcd	560.75	6281.77	126.128	6281.77	6281.77	0	0	0	0	0	0	0	0	0	0	0	15.1											46102
0	7873	hcd	659.3	4258.27	610.315	969.35	969.35	0	0	0	0	0	0	0	0	0	0	0	2.07											34600
0	7878	hcd	379.23	8706.25	126.128	8688.64	8688.64	0	515.17	0	0	0	0	0	0	0	0	0	24.35		1.46									47906		32200
0	7881	hcd	570.26	2068.66	388.839	888.61	888.61	0	0	0	0	0	0	0	0	0	0	0	2.09											33400
0	7882	hcd	410.53	16944.3	126.128	16838.3	16838.3	0	680.93	0	0	0	0	0	0	0	0	0	49.42		2.08									49006		33500
0	7883	hcd	489.7	3426.15	126.128	3422.85	3422.85	0	0	0	0	0	0	0	0	0	0	0	8.59											46900
0	7886	hcd	397.86	17887.4	126.128	17752	17752	0	978.39	0	0	0	0	0	0	0	0	0	52.69		2.91									49306		34900
0	7887	hcd	504.22	6310.77	126.128	6284.68	6284.68	0	0	0	0	0	0	0	0	0	0	0	15.28											46302
0	7890	hcd	635.58	4969.39	537.602	2025.26	2025.26	0	0	0	0	0	0	0	0	0	0	0	4.63											35100
0	7891	hcd	319.22	43822.9	319.218	29200.1	29200.1	0	0	0	0	0	0	0	0	0	0	0	91.31											49802
0	7893	hcd	587.82	21978.6	517.824	7214.26	7214.26	0	0	0	0	0	0	0	0	0	0	0	16.57											47802
0	7894	hcd	550.22	8139.26	239.094	0	0	0	0	0	0	0	0	0	0	0	0	0
0	7896	hcd	364.54	13254.7	126.128	13147.9	13147.9	0	0	0	0	0	0	0	0	0	0	0	39.46											48602
0	7897	hcd	343.2	4726.98	304.857	4618.28	4618.28	0	0	0	0	0	0	0	0	0	0	0	14.54											47700
0	7898	hcd	334.5	5632.19	300.93	1040.19	1040.19	0	0	0	0	0	0	0	0	0	0	0	3.31											34400
0	7900	hcd	359.87	26449.3	126.128	26271.5	26271.5	0	0	0	0	0	0	0	0	0	0	0	77.02											49402
0	7902	hcd	479.23	6344.02	458.272	5071.05	5071.05	0	0	0	0	0	0	0	0	0	0	0	13.63											46400
0	7903	hcd	486.99	5430.07	304.685	4502.35	4502.35	0	0	0	0	0	0	0	0	0	0	0	11.54											44200
0	7904	hcd	570.93	2191.53	532.598	1872.04	1872.04	0	0	0	0	0	0	0	0	0	0	0	4.44											33400
0	7906	hcd	482.73	42005.8	472.288	36970.2	36970.2	0	2291.26	0	0	0	0	0	0	0	0	0	54.19		3.47									49406		33600
0	7907	hcd	404.73	40133.5	126.128	40087.6	40087.6	0	1390.1	0	0	0	0	0	0	0	0	0	108.1		3.77									49702		33800
0	7911	hcd	725.32	1403.08	900.888	0	0	0	0	0	0	0	0	0	0	0	0	0
0	7914	hcd	414.88	6993.81	126.128	6993.47	6993.47	0	0	0	0	0	0	0	0	0	0	0	19.03											47002
0	7917	hcd	473.19	6723.41	126.128	6723.41	6723.41	0	0	0	0	0	0	0	0	0	0	0	17.04											46502
0	7920	hcd	440.52	5099.49	439.844	4410.77	4410.77	0	494.31	0	0	0	0	0	0	0	0	0	11.56		1.3									44804		28900
0	7925	hcd	582.84	4520.76	126.127	4479.9	4479.9	0	0	0	0	0	0	0	0	0	0	0	10.82											44800
0	7926	hcd	456.94	3828.25	126.128	3778.21	3778.21	0	0	0	0	0	0	0	0	0	0	0	10.46											46300
0	7927	hcd	533.19	41020.2	239.095	1031.22	1031.22	0	0	0	0	0	0	0	0	0	0	0	2.52											36100
0	7929	hcd	392.22	398753	149.023	268905	268905	0	0	0	0	0	0	0	0	0	0	0	56.52											49202
0	7935	hcd	426.2	4690.49	126.128	4686.69	4686.69	0	0	0	0	0	0	0	0	0	0	0	12.72											45700
0	7936	hcd	542.82	5641.72	493.834	4624.44	4624.44	0	0	0	0	0	0	0	0	0	0	0	11.36											45300
0	7937	hcd	377.21	9590.62	126.128	9576.75	9576.75	0	0	0	0	0	0	0	0	0	0	0	26.84											48502
0	7939	hcd	509.19	1973.67	126.128	1927.14	1927.14	0	0	0	0	0	0	0	0	0	0	0	4.99											35000
0	7940	hcd	615.29	3503.18	388.791	1938.28	1938.28	0	0	0	0	0	0	0	0	0	0	0	4.46											32700
0	7941	hcd	622.25	1385.41	1242.21	0	0	0	0	0	0	0	0	0	0	0	0	0
0	7943	hcd	643.3	19323.3	126.128	19149.6	19149.6	0	604.01	0	0	0	0	0	0	0	0	0	41.45		1.3									48906		34300
0	7944	hcd	423.18	3274.99	423.238	1683.5	1683.5	0	0	0	0	0	0	0	0	0	0	0	4.61											35000
0	7948	hcd	465.88	5247.44	126.128	5184.15	5184.15	0	0	0	0	0	0	0	0	0	0	0	14.03											45700
0	7949	hcd	413.27	9542.97	413.266	4347.8	4347.8	0	0	0	0	0	0	0	0	0	0	0	12.04											45800
0	7951	hcd	407.55	7477.96	149.023	3080	3080	0	0	0	0	0	0	0	0	0	0	0	8.56											49700
0	7953	hcd	638.63	1781.25	126.127	1781.11	1781.11	0	0	0	0	0	0	0	0	0	0	0	3.94											34300
0	7959	hcd	507.89	3527.17	660.798	680.15	680.15	0	0	0	0	0	0	0	0	0	0	0	1.8											35000
0	7960	hcd	501.46	1437.15	126.128	1430	1430	0	0	0	0	0	0	0	0	0	0	0	3.58											36400
0	7961	hcd	496.21	5816.36	495.833	3731.36	3731.36	0	0	0	0	0	0	0	0	0	0	0	9.11											47900
0	7964	hcd	466.21	4786.12	363.023	3467.83	3467.83	0	0	0	0	0	0	0	0	0	0	0	9.26											47700
0	7971	hcd	493.57	36494.7	414.245	28099.7	28099.7	0	831.49	0	0	0	0	0	0	0	0	0	72.95		2.14									49702		33400
0	7972	hcd	552.22	5926.42	272.171	854.14	854.14	0	0	0	0	0	0	0	0	0	0	0	2.22											32100
0	7973	hcd	579.11	3731.68	167.055	711.78	711.78	0	0	0	0	0	0	0	0	0	0	0	1.66											34900
0	7975	hcd	573.62	48965	540.957	41849.3	41849.3	0	3877.86	0	0	0	0	0	0	0	0	0	96.32		9.11									49806		45900
0	7976	hcd	331	11921.1	176.989	3647.45	3647.45	0	0	0	0	0	0	0	0	0	0	0	11.24											45300
0	7981	hcd	344.71	9914.59	126.128	9853.5	9853.5	0	0	0	0	0	0	0	0	0	0	0	32.48											48802
0	7982	hcd	526.74	1951.39	760.384	1362.36	1362.36	0	0	0	0	0	0	0	0	0	0	0	3.43											35500
0	7985	hcd	437.38	8084.51	567.326	7886.65	7886.65	0	0	0	0	0	0	0	0	0	0	0	22.19											47902
0	7986	hcd	696.28	1715.49	388.806	0	0	0	0	0	0	0	0	0	0	0	0	0
0	7987	hcd	468.57	4359.41	126.128	4359.29	4359.29	0	0	0	0	0	0	0	0	0	0	0	11.11											44900
0	7989	hcd	499.25	82232	272.171	45432.3	45432.3	0	917.25	0	0	0	0	0	0	0	0	0	82.57		1.7									49402		31900
0	7994	hcd	378.73	5947.94	126.128	5899.74	5899.74	0	0	0	0	0	0	0	0	0	0	0	17.61											46302
0	7995	hcd	686.27	1642.35	2026.46	0	0	0	0	0	0	0	0	0	0	0	0	0
0	8004	hcd	454.63	4565.9	126.128	4548.84	4548.84	0	0	0	0	0	0	0	0	0	0	0	12.36											46000
0	8005	hcd	430.46	17230.9	347.203	9116.95	9116.95	0	0	0	0	0	0	0	0	0	0	0	24.8											47902
0	8006	hcd	413.73	13405.9	126.128	13405.9	13405.9	0	0	0	0	0	0	0	0	0	0	0	35.56											48102
0	8008	hcd	516.21	7290.22	126.128	7247.28	7247.28	0	0	0	0	0	0	0	0	0	0	0	17.75											46502
0	8010	hcd	630.25	8455.49	532.602	3648.34	3648.34	0	0	0	0	0	0	0	0	0	0	0	8.63											52600
0	8011	hcd	538.5	10906.9	299.062	3472.78	3472.78	0	0	0	0	0	0	0	0	0	0	0	9.02											52400
0	8012	hcd	423.24	4488.7	126.127	4486.55	4486.55	0	0	0	0	0	0	0	0	0	0	0	12.23											45000
0	8014	hcd	647.27	1840.97	543.947	1185.04	1185.04	0	0	0	0	0	0	0	0	0	0	0	2.51											35000
0	8017	hcd	381.25	154161	381.25	86215.3	86215.3	0	562.09	0	0	0	0	0	0	0	0	0	254.44		1.69									50402		35200
0	8018	hcd	397.46	10118.9	126.128	10043.4	10043.4	0	0	0	0	0	0	0	0	0	0	0	29.35											47702
0	8024	hcd	422.21	4101.78	126.128	4098.57	4098.57	0	0	0	0	0	0	0	0	0	0	0	11											45000
0	8026	hcd	351.49	4138.91	360.199	1335.41	1335.41	0	0	0	0	0	0	0	0	0	0	0	4.24											34800
0	8027	hcd	562.61	2189.39	561.272	1545.91	1545.91	0	0	0	0	0	0	0	0	0	0	0	3.66											35700
0	8031	hcd	576.94	3324.88	544.28	1664.74	1664.74	0	0	0	0	0	0	0	0	0	0	0	3.83											34000
0	8036	hcd	327.71	27119.9	239.095	1299.24	1299.24	0	0	0	0	0	0	0	0	0	0	0	4.08											33600
0	8037	hcd	313.84	16207	225.043	8920.23	8920.23	0	0	0	0	0	0	0	0	0	0	0	27.7											48002
0	8040	hcd	496.22	9735.62	126.128	9666.54	9666.54	0	0	0	0	0	0	0	506.6	0	0	0	25.44								1.3			47602								33500
0	8041	hcd	507.55	5364.4	420.992	0	0	0	0	0	0	0	0	0	0	0	0	0
0	8042	hcd	582.72	8980.14	136.076	3832.85	3832.85	0	0	0	0	0	0	0	0	0	0	0	8.76											45900
0	8047	hcd	501.25	1550.85	388.812	1187.96	1187.96	0	0	0	0	0	0	0	0	0	0	0	3.13											33000
0	8048	hcd	335.22	26743.7	223.064	3964.27	3964.27	0	0	0	0	0	0	0	0	0	0	0	12.4											45900
0	8049	hcd	396.43	6834.28	126.128	6684.55	6684.55	0	802.42	0	0	0	0	0	0	0	0	0	20.3		2.48									47706		31900
0	8050	hcd	398.74	1563.52	126.128	1535.69	1535.69	0	0	0	0	0	0	0	0	0	0	0	4.34											34600
0	8053	hcd	470.25	35358.3	400.253	16077.4	16077.4	0	0	0	0	0	0	0	0	0	0	0	42.33											48602
0	8054	hcd	486.88	13228.5	144.081	5924.17	5924.17	0	0	0	0	0	0	0	0	0	0	0	15.6											46902
0	8055	hcd	598.75	1370.71	815.412	1017.9	1017.9	0	0	0	0	0	0	0	0	0	0	0	2.25											35500
0	8058	hcd	541.48	4325.36	334.191	4255.07	4255.07	0	0	0	0	0	0	0	0	0	0	0	11.21											45800
0	8059	hcd	441.28	8778.47	126.128	8736.18	8736.18	0	0	0	0	0	0	0	0	0	0	0	22.91											48002
0	8063	hcd	422.2	3864.45	126.127	3841.34	3841.34	0	0	0	0	0	0	0	0	0	0	0	10.83											44600
0	8065	hcd	511.96	15333.8	438.729	10536.2	10536.2	0	0	0	0	0	0	0	0	0	0	0	26.26											48002
0	8068	hcd	614.95	2057.7	388.803	1055.6	1055.6	0	0	0	0	0	0	0	0	0	0	0	2.44											33600
0	8069	hcd	551.89	3270.26	388.785	1456.39	1456.39	0	0	0	0	0	0	0	0	0	0	0	3.56											34000
0	8070	hcd	348.86	46894.2	126.128	46791.8	46791.8	0	1415.94	0	0	0	0	0	0	0	0	0	101.04		3.19									49802		34500
0	8074	hcd	399.72	4975.49	339.116	1287.89	1287.89	0	0	0	0	0	0	0	0	0	0	0	3.92											34100
0	8075	hcd	619.76	1176.76	620.093	0	0	0	0	0	0	0	0	0	0	0	0	0
0	8081	hcd	397.21	15070.5	126.128	14975.2	14975.2	0	0	0	0	0	0	0	0	0	0	0	43.74											49402
0	8082	hcd	491.25	6263.71	126.128	6245.28	6245.28	0	0	0	0	0	0	0	0	0	0	0	15.83											46902
0	8085	hcd	378.17	6171.28	223.064	3391.72	3391.72	0	0	0	0	0	0	0	0	0	0	0	10.01											46600
0	8086	hcd	523.28	28903.9	266.692	24118.6	24118.6	0	0	0	0	0	0	0	0	0	0	0	56.87											48902
0	8088	hcd	450.29	5452.58	126.128	5438.3	5438.3	0	0	0	0	0	0	0	0	0	0	0	14.69											46002
0	8089	hcd	699.79	2012.01	388.75	0	0	0	0	0	0	0	0	0	0	0	0	0
0	8090	hcd	421.96	5366.36	126.128	5335.75	5335.75	0	0	0	0	0	0	0	0	0	0	0	14.59											45702
0	8092	hcd	682.62	2341.04	590.641	1338.73	1338.73	0	0	0	0	0	0	0	0	0	0	0	3.19											31800
0	8093	hcd	359.83	20366	175.119	17936	17936	0	719.36	0	0	0	0	0	0	0	0	0	52.37		2.14									49206		33300
0	8098	hcd	343.17	2647.05	231.005	1502.25	1502.25	0	0	0	0	0	0	0	0	0	0	0	4.91											34600
0	8099	hcd	441.42	8646.39	126.128	8525.78	8525.78	0	0	0	0	0	0	0	0	0	0	0	23.24											48002
0	8102	hcd	820.84	3776.04	388.804	908.16	908.16	0	0	0	0	0	0	0	0	0	0	0	1.82											34000
0	8103	hcd	749.34	1808.14	2208.36	0	0	0	0	0	0	0	0	0	0	0	0	0
0	8106	hcd	402.72	133260	126.128	132951	132951	0	2011.01	0	0	0	0	0	0	0	0	0	209.54		3.18									50002		34800
0	8107	hcd	589.91	4679.87	126.128	4663.17	4663.17	0	0	0	0	0	0	0	0	0	0	0	11.08											45600
0	8108	hcd	439.95	17093.7	439.844	7125.72	7125.72	0	531.54	0	0	0	0	0	0	0	0	0	19.42		1.49									47502		34600
0	8110	hcd	362.22	161084	126.128	160468	160468	0	2187.34	0	0	0	0	0	0	0	0	0	184.71		2.58									50002		35900
0	8113	hcd	564.86	2090.27	126.127	2088.32	2088.32	0	0	0	0	0	0	0	0	0	0	0	4.99											35300
0	8117	hcd	424.15	6134.12	126.128	6125.14	6125.14	0	0	0	0	0	0	0	0	0	0	0	17.37											46402
0	8118	hcd	502.22	18049.2	120.081	613.32	613.32	0	0	0	0	0	0	0	0	0	0	0	1.58											32100
0	8119	hcd	577.74	3875.83	126.128	3859.93	3859.93	0	0	0	0	0	0	0	0	0	0	0	9.08											45900
0	8120	hcd	568.59	1521.78	126.128	1508.14	1508.14	0	0	0	0	0	0	0	0	0	0	0	3.57											36100
0	8121	hcd	559.93	1286.3	1397.11	672.84	672.84	0	0	0	0	0	0	0	0	0	0	0	1.62											35000
0	8123	hcd	547.23	70350.2	126.128	69580.5	69580.5	0	1189.29	402.59	0	0	0	0	0	0	0	0	98.22		1.75									50202		32400
0	8124	hcd	421.54	7581.8	126.128	7555.72	7555.72	0	0	0	0	0	0	0	0	0	0	0	20.74											48002
0	8127	hcd	332.86	3903.47	126.128	3865.38	3865.38	0	0	0	0	0	0	0	0	0	0	0	11.89											45200
0	8134	hcd	523.25	17887.7	126.128	17773	17773	0	753.23	0	0	0	0	0	0	0	0	0	44.58		1.88									49006		33700
0	8135	hcd	433.72	11757.6	384.727	9498.69	9498.69	0	790.19	0	0	0	0	0	0	0	0	0	27.8		2.2									48406		36000
0	8136	hcd	410.92	8861.69	126.128	8839.72	8839.72	0	578.56	0	0	0	0	0	0	0	0	0	24.38		1.6									47606		33000
0	8138	hcd	440.24	13647	126.128	13487.1	13487.1	0	0	0	0	0	0	0	0	0	0	0	37.93											48802
0	8139	hcd	565.53	5210.59	126.128	5189.99	5189.99	0	0	0	0	0	0	0	0	0	0	0	12.51											46100
0	8140	hcd	595.79	6291.7	248.18	1675.79	1675.79	0	0	0	0	0	0	0	0	0	0	0	3.86											33500
0	8143	hcd	515.57	6010.76	482.911	5471.52	5471.52	0	0	0	0	0	0	0	0	0	0	0	14.04											46500
0	8144	hcd	416.88	10949.6	126.128	10948	10948	0	877.78	0	0	0	0	0	0	0	0	0	32.29		2.6									48206		35500
0	8145	hcd	631.8	10806.9	126.128	10802.4	10802.4	0	0	0	0	0	0	0	0	0	0	0	23.12											47902
0	8149	hcd	426.7	9089.32	126.128	8989.74	8989.74	0	0	0	0	0	0	0	0	0	0	0	24.94											48502
0	8150	hcd	650.79	1111.89	685.363	0	0	0	0	0	0	0	0	0	0	0	0	0
0	8155	hcd	605.58	1701.65	388.817	1145.89	1145.89	0	0	0	0	0	0	0	0	0	0	0	2.58											35000
0	8156	hcd	505.75	10281.5	418.995	8210.55	8210.55	0	0	0	0	0	0	0	0	0	0	0	20.95											47102
0	8157	hcd	489.71	3628.01	126.127	3595.08	3595.08	0	0	0	0	0	0	0	0	0	0	0	9.32											49300
0	8159	hcd	635.58	2317.18	543.605	1469.4	1469.4	0	0	0	0	0	0	0	0	0	0	0	3.32											34600
0	8160	hcd	386.93	18851.4	272.171	1338.53	1338.53	0	0	0	0	0	0	0	0	0	0	0	3.53											36100
0	8161	hcd	466.54	3692.61	126.128	3687.76	3687.76	0	0	0	0	0	0	0	0	0	0	0	10.01											46300
0	8162	hcd	711.76	1415.23	1292.15	0	0	0	0	0	0	0	0	0	0	0	0	0
0	8164	hcd	364.54	9866.14	126.128	9859.78	9859.78	0	0	0	0	0	0	0	0	0	0	0	30.43											48102
0	8165	hcd	588.33	10171.8	518.325	9902.71	9902.71	0	0	0	0	0	0	0	0	0	0	0	23.21											48102
0	8166	hcd	570.5	3766.04	126.128	3750.88	3750.88	0	0	0	0	0	0	0	0	0	0	0	8.71											46600
0	8168	hcd	359.87	23594.6	126.128	23506.8	23506.8	0	648.5	0	0	0	0	0	0	0	0	0	71		2.06									49602		33200
0	8172	hcd	337.5	17180.3	304.845	12752.7	12752.7	0	0	0	0	0	0	0	0	0	0	0	41.3											49102
0	8173	hcd	570.23	1859.49	126.127	1849.97	1849.97	0	0	0	0	0	0	0	0	0	0	0	4.08											33500
0	8175	hcd	482.73	29374.4	472.288	17734.8	17734.8	0	626.76	0	0	0	0	0	0	0	0	0	45.2		1.62									49206		35400
0	8176	hcd	334.18	8110.08	300.932	7482.32	7482.32	0	0	0	0	0	0	0	0	0	0	0	22.31											47102
0	8179	hcd	308.68	22049.6	308.9	21926.2	21926.2	0	0	0	0	0	0	0	0	0	0	0	67.62											49702
0	8180	hcd	599.94	2292.72	540.624	1338.56	1338.56	0	0	0	0	0	0	0	0	0	0	0	3.09											35200
0	8181	hcd	558.5	4693.78	248.18	1044.62	1044.62	0	0	0	0	0	0	0	0	0	0	0	2.61											34300
0	8184	hcd	472.94	48563.7	399.454	21489.3	21489.3	0	0	0	0	0	0	0	0	0	0	0	33.58											48202
0	8185	hcd	404.73	14222.4	126.128	14211.7	14211.7	0	962.72	0	0	0	0	0	0	0	0	0	39.78		2.75									48706		34300
0	8188	hcd	500.76	59354.4	451.772	18735.8	18735.8	0	576.7	0	0	0	0	0	0	0	0	0	47.91		1.47									48906		35100
0	8189	hcd	396.53	12440.1	311.697	10441.1	10441.1	0	945.95	0	0	0	0	0	0	0	0	0	29.91		2.78									48406		31800
0	8190	hcd	570.56	2060.96	126.128	2059.02	2059.02	0	0	0	0	0	0	0	0	0	0	0	4.71											34500
0	8193	hcd	415.73	9568.96	369.224	7410.88	7410.88	0	607.97	0	0	0	0	0	0	0	0	0	20.92		1.72									47706		32900
0	8194	hcd	426.56	9739.33	126.128	9628.68	9628.68	0	0	0	0	0	0	0	0	0	0	0	25.51											47702
0	8195	hcd	329.52	28505.7	174.992	19504	19504	0	0	0	0	0	0	0	0	0	0	0	60.76											49102
0	8197	hcd	582.5	4843.69	126.128	4838.53	4838.53	0	0	0	0	0	0	0	0	0	0	0	11.65											46400
0	8198	hcd	728.29	2511.73	400.23	0	0	0	0	0	0	0	0	0	0	0	0	0
0	8201	hcd	392.89	241964	149.023	185778	185778	0	22591.4	0	0	0	0	0	0	0	0	0	125.65		15.48									50106		47000
0	8202	hcd	486.99	7512.88	304.685	6448.38	6448.38	0	0	0	0	0	0	0	0	0	0	0	16.5											46702
0	8203	hcd	734.3	2429.99	400.23	0	0	0	0	0	0	0	0	0	0	0	0	0
0	8207	hcd	485.71	6834.63	126.128	6805.37	6805.37	0	0	0	0	0	0	0	0	0	0	0	17.42											46702
0	8208	hcd	1092.93	5237.21	388.739	0	0	0	0	0	0	0	0	0	0	0	0	0
0	8209	hcd	316.4	20212.4	299.062	7598.9	7598.9	0	0	0	0	0	0	0	0	0	0	0	23.45											47902
0	8210	hcd	608.25	9124.27	225.043	823.25	823.25	0	0	0	0	0	0	0	0	0	0	0	2.01											36400
0	8211	hcd	344.2	14782.6	126.128	14768.6	14768.6	0	623.33	0	0	0	0	0	0	0	0	0	44.45		1.86									48806		34200
0	8213	hcd	643.3	12092	126.128	12051.1	12051.1	0	0	0	0	0	0	0	0	0	0	0	24.99											47902
0	8216	hcd	463.72	31184.8	360.028	6758.54	6758.54	0	642.51	0	0	0	0	0	0	0	0	0	17.75		1.72									47106		32500
0	8217	hcd	745.93	2109.29	388.734	0	0	0	0	0	0	0	0	0	0	0	0	0
0	8218	hcd	543.32	8236.62	493.835	7460.7	7460.7	0	0	0	0	0	0	0	0	0	0	0	18.71											47502
0	8219	hcd	456.94	4836.72	126.128	4836.7	4836.7	0	0	0	0	0	0	0	0	0	0	0	12.66											45500
0	8222	hcd	485.49	4463.6	126.128	4445.27	4445.27	0	0	0	0	0	0	0	0	0	0	0	12.32											45200
0	8223	hcd	407.75	11394.6	149.023	3242.73	3242.73	0	0	0	0	0	0	0	0	0	0	0	8.94											46100
0	8224	hcd	734.63	4727.36	400.23	0	0	0	0	0	0	0	0	0	0	0	0	0
0	8225	hcd	489.26	20304.7	126.128	20303.1	20303.1	0	0	0	0	0	0	0	0	0	0	0	50.01											49202
0	8227	hcd	638.63	2309.11	126.128	2244.65	2244.65	0	0	0	0	0	0	0	0	0	0	0	5.12											37100
0	8228	hcd	551.26	5144.14	502.275	3585.54	3585.54	0	0	0	0	0	0	0	0	0	0	0	8.81											49400
0	8231	hcd	632.64	54468.6	599.98	34143.3	34143.3	0	1479.24	0	0	0	0	0	0	0	0	0	73.79		3.24									49206		34500
0	8232	hcd	469.9	13484	126.128	13453.6	13453.6	0	0	0	0	0	0	0	0	0	0	0	35.64											49002
0	8233	hcd	474.98	15404.2	417.22	11641.3	11641.3	0	0	0	0	0	0	0	0	0	0	0	29.39											48302
0	8234	hcd	591.92	14443.7	126.128	14440	14440	0	0	0	0	0	0	0	0	0	0	0	33.36											48402
0	8237	hcd	486.16	6900.6	126.128	6860.54	6860.54	0	0	0	0	0	0	0	0	0	0	0	17.62											47302
0	8238	hcd	659.29	2354.74	126.128	2354.74	2354.74	0	0	0	0	0	0	0	0	0	0	0	5.03											35300
0	8239	hcd	489.77	20586	126.128	20563.6	20563.6	0	1221.11	0	0	473.92	0	0	0	0	0	0	55.74		3.4			1.28						49106		34500			30800
0	8240	hcd	503.39	7103.06	126.128	7097.37	7097.37	0	0	0	0	0	0	0	0	0	0	0	17.07											46302
0	8244	hcd	672.31	6855.79	623.321	1700.06	1700.06	0	0	0	0	0	0	0	0	0	0	0	3.63											34800
0	8245	hcd	621.27	3766.72	126.128	3766.24	3766.24	0	0	0	0	0	0	0	0	0	0	0	8.53											49100
0	8246	hcd	525.23	2160.62	126.128	2126.46	2126.46	0	0	0	0	0	0	0	0	0	0	0	5.32											37400
0	8248	hcd	493.57	24697.1	428.253	18235.4	18235.4	0	0	0	0	0	0	0	0	0	0	0	46.43											48502
0	8249	hcd	367.85	15469.4	456.256	6260.58	6260.58	0	0	0	0	0	0	0	0	0	0	0	19.26											47602
0	8250	hcd	728.96	1602.02	915.151	0	0	0	0	0	0	0	0	0	0	0	0	0
0	8252	hcd	573.62	31080.1	347.203	28610.5	28610.5	0	1430.68	0	0	0	0	0	0	0	0	0	65.44		3.29									49506		32100
0	8253	hcd	623.63	1662.68	1390.45	679.46	679.46	0	0	0	0	0	0	0	0	0	0	0	1.56											35100
0	8257	hcd	447.35	158003	361.025	24178	24178	0	3582.03	0	0	0	0	0	0	0	0	0	65		9.86									49306		44500
0	8258	hcd	624.96	7723.4	592.297	5740.51	5740.51	0	0	0	509.1	0	0	0	0	0	0	0	12.3											45200
0	8260	hcd	437.13	10320.3	126.128	10304	10304	0	0	0	0	0	0	0	0	0	0	0	27.2											48302
0	8265	hcd	461.23	68400	126.128	68129.1	68129.1	0	938.35	0	0	0	0	0	0	0	0	0	179.66		2.55									49902		33400
0	8266	hcd	548.26	24857	494.268	15532.1	15532.1	0	0	0	0	0	0	0	0	0	0	0	35.81											48302
0	8269	hcd	887.38	4337.87	388.754	1221.92	1221.92	0	0	0	0	0	0	0	0	0	0	0	2.16											35200
0	8270	hcd	377.21	16749.1	126.128	16657	16657	0	0	0	0	0	0	0	0	0	0	0	46.63											48902
0	8274	hcd	530.57	3459.59	564.252	695.83	695.83	0	0	0	0	0	0	0	0	0	0	0	1.68											37500
0	8278	hcd	358.86	10741.7	126.128	10740.4	10740.4	0	0	0	0	0	0	0	0	0	0	0	30.63											47902
0	8280	hcd	454.38	18208.6	454.237	8567.02	8567.02	0	0	0	0	0	0	0	0	0	0	0	24.02											47202
0	8281	hcd	367.21	16717.1	126.128	16716.9	16716.9	0	943.65	0	0	0	0	0	0	0	0	0	47.85		2.72									48706		32300
0	8284	hcd	630.25	50489.9	538.274	17184	17184	0	901.58	0	0	0	0	0	0	0	0	0	39.52		2.15									48906		33200
0	8285	hcd	538.75	7478.53	126.128	7478.53	7478.53	0	0	0	0	0	0	0	0	0	0	0	18.21											46902
0	8286	hcd	407.95	19166.9	149.023	4356.96	4356.96	0	0	0	0	0	0	0	0	0	0	0	11.98											45500
0	8288	hcd	583.9	6330.6	486.252	1013.59	1013.59	0	0	0	0	0	0	0	0	0	0	0	2.34											38300
0	8289	hcd	647.61	5028.15	126.128	4971.71	4971.71	0	0	0	0	0	0	0	0	0	0	0	11.29											43800
0	8290	hcd	515.96	7301.85	126.128	7284.45	7284.45	0	0	0	0	0	0	0	0	0	0	0	17.61											46902
0	8293	hcd	587.91	18226	517.825	4502.75	4502.75	0	0	0	0	0	0	0	0	0	0	0	10.24											44100
0	8294	hcd	438.18	7033.04	437.75	5539.95	5539.95	0	0	0	0	0	0	0	0	0	0	0	16.14											47102
0	8295	hcd	401.2	10655.7	126.128	10653.1	10653.1	0	836.97	0	0	0	0	0	0	0	0	0	30.66		2.4									47906		33700
0	8298	hcd	468.97	8613.61	126.128	8567.48	8567.48	0	0	0	0	0	0	0	0	0	0	0	23.1											47702
0	8299	hcd	441.21	13410.4	126.128	13403.8	13403.8	0	0	0	0	0	0	0	0	0	0	0	36.09											48402
0	8302	hcd	527.75	10784.3	126.128	10737.8	10737.8	0	0	0	0	0	0	0	0	0	0	0	26.28											47502
0	8303	hcd	411.45	6659.39	126.128	6657.47	6657.47	0	0	0	0	0	0	0	0	0	0	0	18.22											47002
0	8306	hcd	456.88	6448.4	126.128	6406.71	6406.71	0	0	0	0	0	0	0	0	0	0	0	17.58											46902
0	8307	hcd	534.26	11385.6	239.095	10874.2	10874.2	0	0	0	0	0	0	0	0	0	0	0	26.25											47902
0	8308	hcd	377.46	20862.2	377.223	13680.9	13680.9	0	632.41	0	0	0	0	0	0	0	0	0	38.23		1.8									48506		35500
0	8311	hcd	343.72	22031.5	126.128	21909.7	21909.7	0	0	0	0	0	0	0	0	0	0	0	66.47											49502
0	8312	hcd	450.2	8330.96	126.128	8330.48	8330.48	0	0	0	0	0	0	0	0	0	0	0	23.14											47302
0	8313	hcd	498.74	27702.1	126.128	27533.1	27533.1	0	0	0	0	0	0	0	0	0	0	0	70.54											49702
0	8314	hcd	795.35	1748.48	1312.56	0	0	0	0	0	0	0	0	0	0	0	0	0
0	8316	hcd	314.17	8935.06	126.128	8891.09	8891.09	0	0	0	0	0	0	0	0	0	0	0	28.59											47902
0	8317	hcd	451.73	12366.4	402.737	12137.6	12137.6	0	0	0	0	0	0	0	0	0	0	0	33.45											48602
0	8318	hcd	352.17	9225.23	126.128	9027.89	9027.89	0	0	0	0	0	0	0	0	0	0	0	28.39											47702
0	8319	hcd	586.91	3918.16	258.145	3620.11	3620.11	0	0	0	0	0	0	0	0	0	0	0	8.47											53000
0	8323	hcd	464.9	22354.4	126.128	22276.8	22276.8	0	747.11	0	0	0	0	0	0	0	0	0	58.35		2.04									48906		36200
0	8324	hcd	646.98	2164.33	126.128	2156.07	2156.07	0	0	0	0	0	0	0	0	0	0	0	4.58											34900
0	8327	hcd	477.44	18422.5	248.18	15799.3	15799.3	0	764.45	0	0	0	0	0	0	0	0	0	42.8		2.11									48806		36300
0	8328	hcd	660.81	8863.32	611.819	1960.41	1960.41	0	0	0	0	0	0	0	0	0	0	0	4.44											34900
0	8329	hcd	561.56	1548.76	126.128	1524.53	1524.53	0	0	0	0	0	0	0	0	0	0	0	3.75											34400
0	8332	hcd	647.63	5479.25	126.128	5384.93	5384.93	0	615.31	0	0	0	0	0	0	0	0	0	11.83		1.33									45204		30400
0	8333	hcd	576.24	4691.1	255.108	1677.62	1677.62	0	0	0	0	0	0	0	0	0	0	0	4.09											35200
0	8334	hcd	509.44	3906.2	126.128	3873.13	3873.13	0	0	0	0	0	0	0	0	0	0	0	9.12											46300
0	8337	hcd	483.56	64170.4	468.772	11206.2	11206.2	0	0	0	0	0	0	0	0	0	0	0	17.45											46102
0	8338	hcd	377.53	15586	377.223	14919.6	14919.6	0	868.1	0	0	0	0	0	0	0	0	0	42.2		2.43									48906		35700
0	8340	hcd	724.84	12095	654.837	0	0	0	0	0	0	0	0	0	0	0	0	0
0	8341	hcd	813.14	4149.65	388.713	0	0	0	0	0	0	0	0	0	0	0	0	0
0	8342	hcd	680.27	1235.19	1098.55	0	0	0	0	0	0	0	0	0	0	0	0	0
0	8344	hcd	511.96	14766.9	442.983	11630.5	11630.5	0	711.96	0	0	0	0	0	0	0	0	0	29.59		1.79									48606		36800
0	8345	hcd	582.75	30239.5	126.128	30239.5	30239.5	0	680.62	0	0	0	0	0	0	0	0	0	67.74		1.59									49502		33500
0	8347	hcd	614.96	78171.2	582.3	26572.4	26572.4	0	0	0	0	0	0	0	0	0	0	0	58.85											49302
0	8348	hcd	385.15	46168.5	299.062	5754.48	5754.48	0	0	0	0	0	0	0	0	0	0	0	16.68											46502
0	8349	hcd	560.26	2100.37	126.128	2070.07	2070.07	0	0	0	0	0	0	0	0	0	0	0	4.79											35700
0	8351	hcd	348.86	19323.8	126.128	19165	19165	0	523.74	0	0	0	0	0	0	0	0	0	57.58		1.62									49502		33900
0	8352	hcd	385.84	21423.3	299.062	3551.26	3551.26	0	0	0	0	0	0	0	0	0	0	0	10.12											47000
0	8353	hcd	509.73	11409.7	416.226	5784.88	5784.88	0	0	0	0	0	0	0	0	0	0	0	14.87											47502
0	8355	hcd	378.54	5023.73	420.22	4664.24	4664.24	0	497.77	0	0	0	0	0	0	0	0	0	14.14		1.49									46404		32400
0	8356	hcd	541.24	27175.5	492.248	3530.9	3530.9	0	0	0	0	0	0	0	0	0	0	0	9.08											53100
0	8357	hcd	331.69	3510.9	126.127	3502.09	3502.09	0	0	0	0	0	0	0	0	0	0	0	10.8											45500
0	8360	hcd	501.53	12244.1	452.273	6414.47	6414.47	0	0	0	0	0	0	0	0	0	0	0	16.9											47002
0	8361	hcd	496.21	5215.48	126.128	5215.48	5215.48	0	0	0	0	0	0	0	0	0	0	0	13.07											47000
0	8366	hcd	488.01	6778.65	126.128	6708.52	6708.52	0	0	0	0	0	0	0	0	0	0	0	17.77											47202
0	8367	hcd	611.26	14088.6	355.07	3602.89	3602.89	0	0	0	0	0	0	0	0	0	0	0	8.15											50300
0	8368	hcd	376.4	15464	126.128	15423.4	15423.4	0	1310.56	0	0	0	0	0	0	0	0	0	44.57		3.81									49106		35000
0	8371	hcd	458.54	7363.52	126.128	7304.35	7304.35	0	0	0	0	0	0	0	0	0	0	0	19.34											46502
0	8372	hcd	605.5	1516.87	1533.92	874.96	874.96	0	0	0	0	0	0	0	0	0	0	0	2.11											33400
0	8373	hcd	401.24	127134	126.128	125493	125493	0	2670.49	0	0	0	0	0	0	0	0	0	186.33		4.07									50102		34300
0	8374	hcd	375.87	16237.1	126.128	16086.9	16086.9	0	825.94	0	0	0	0	0	0	0	0	0	49.38		2.6									49406		34100
0	8375	hcd	486.22	10778.3	126.128	10729.6	10729.6	0	0	0	0	0	0	0	0	0	0	0	27.31											48402
0	8378	hcd	397.46	10244.3	126.128	10136.9	10136.9	0	611.25	0	0	0	0	0	0	0	0	0	29.24		1.78									48206		34700
0	8379	hcd	409.97	6615.58	409.784	5012.15	5012.15	0	0	0	0	0	0	0	0	0	0	0	14.66											46100
0	8380	hcd	319.22	38056.1	319.218	25407.1	25407.1	0	0	0	0	0	0	0	0	0	0	0	78.26											49402
0	8381	hcd	569.25	1518.93	175.119	1210.1	1210.1	0	0	0	0	0	0	0	0	0	0	0	2.77											36300
0	8384	hcd	544.75	8431.74	786.374	2089.54	2089.54	0	0	0	0	0	0	0	0	0	0	0	5.35											34900
0	8385	hcd	560.77	7588.33	126.128	7584.08	7584.08	0	0	0	0	0	0	0	0	0	0	0	18.19											46302
0	8388	hcd	480.5	12038.2	126.128	11980.8	11980.8	0	0	0	0	0	0	0	0	0	0	0	30.22											48202
0	8389	hcd	731.49	1877.77	388.686	0	0	0	0	0	0	0	0	0	0	0	0	0
0	8390	hcd	479.23	6847.56	126.128	6825.13	6825.13	0	666.09	0	0	0	0	0	0	0	0	0	18.1		1.75									47202		36100
0	8391	hcd	569.75	5146.29	126.128	5142.35	5142.35	0	0	0	0	0	0	0	0	0	0	0	12.06											44100
0	8393	hcd	362.22	139384	126.128	137910	137910	0	2312.81	0	0	0	0	0	0	0	0	0	178.65		3.09									50202		31500
0	8394	hcd	323.21	14072	126.128	14072	14072	0	0	0	0	0	0	0	0	0	0	0	43.52											49202
0	8395	hcd	687.61	5688.53	638.325	1460.81	1460.81	0	0	0	0	0	0	0	0	0	0	0	3.02											34300
0	8400	hcd	499.39	32797.1	126.128	32746.6	32746.6	0	1651.03	0	0	0	0	0	0	0	0	0	79.9		4.15									49502		35800
0	8404	hcd	915.89	1844.2	1752.83	875.03	875.03	0	0	0	0	0	0	0	0	0	0	0	1.54											34000
0	8406	hcd	421.54	35486.4	414.255	31626.4	31626.4	0	0	0	0	0	0	0	0	0	0	0	49.79											48902
0	8411	hcd	433.98	10264.6	126.128	10210.5	10210.5	0	0	0	0	0	0	0	0	0	0	0	28.37											47802
0	8412	hcd	565.95	3655.16	126.128	3606.96	3606.96	0	0	575.59	0	0	0	0	0	0	0	0	8.87			1.4								46900			33200
0	8413	hcd	656.63	2158.58	388.675	0	0	0	0	0	0	0	0	0	0	0	0	0
0	8414	hcd	602.26	3088.14	553.276	2014.31	2014.31	0	0	0	0	0	0	0	0	0	0	0	4.74											34600
0	8415	hcd	560.75	7874.24	126.128	7819.02	7819.02	0	0	0	0	0	0	0	0	0	0	0	18.41											46702
0	8418	hcd	522.22	17423.2	456.256	1749.41	1749.41	0	0	0	0	0	0	0	0	0	0	0	4.49											35200
0	8419	hcd	503.64	4436.71	126.128	4363.53	4363.53	0	0	0	0	0	0	0	0	0	0	0	10.84											45000
0	8420	hcd	682.28	1692.77	225.043	1318.2	1318.2	0	0	0	0	0	0	0	0	0	0	0	2.67											34700
0	8423	hcd	596.3	6463.54	248.18	4356.98	4356.98	0	593.97	0	0	0	0	0	0	0	0	0	10.2		1.39									47804		33700
0	8427	hcd	582.61	7974.34	126.128	7932.2	7932.2	0	0	0	0	0	0	0	0	0	0	0	18.46											46902
0	8428	hcd	332.19	3822.45	225.042	3357.47	3357.47	0	0	0	0	0	0	0	0	0	0	0	10.99											46600
0	8429	hcd	470.22	7920.31	421.236	7335.94	7335.94	0	0	0	0	0	0	0	0	0	0	0	19.96											47302
0	8430	hcd	313.71	24749.3	225.043	10639	10639	0	1051.36	0	0	0	0	0	0	0	0	0	33.5		3.48									48706		33300
0	8435	hcd	626.28	2269.24	126.128	2264.66	2264.66	0	0	0	0	0	0	0	0	0	0	0	5.25											35200
0	8436	hcd	627.78	6267.25	578.788	1179.77	1179.77	0	0	0	0	0	0	0	0	0	0	0	2.59											35800
0	8439	hcd	540.21	15164.3	315.669	12151.9	12151.9	0	0	0	0	0	0	0	0	0	0	0	29.96											48702
0	8440	hcd	489.22	8249.08	126.128	8213.36	8213.36	0	0	0	0	0	0	0	0	0	0	0	21.44											47302
0	8441	hcd	489.71	8096.28	126.128	8096.24	8096.24	0	0	0	0	0	0	0	0	0	0	0	20.85											47502
0	8443	hcd	635.58	4127.84	522.272	1315.68	1315.68	0	0	0	0	0	0	0	0	0	0	0	3.09											34700
0	8444	hcd	499.64	13057.2	272.171	10663.7	10663.7	0	0	0	0	0	0	0	0	0	0	0	28.58											47902
0	8445	hcd	464.63	27906	361.025	5126.82	5126.82	0	0	0	0	0	0	0	0	0	0	0	13.22											45500
0	8447	hcd	364.54	8760.86	126.128	8686.42	8686.42	0	0	0	0	0	0	0	0	0	0	0	25.89											48402
0	8449	hcd	587.83	12090	517.825	4837.08	4837.08	0	0	0	0	0	0	0	0	0	0	0	11.13											46200
0	8450	hcd	504.99	29087.9	418.995	7307.13	7307.13	0	1178.72	0	0	0	0	0	0	0	0	0	18.4		2.98									47606		33600
0	8451	hcd	409.52	10047	344.177	4016.23	4016.23	0	0	0	0	0	0	0	0	0	0	0	11.21											44700
0	8454	hcd	397.86	17892.4	126.128	17758.8	17758.8	0	506.57	0	0	0	0	0	0	0	0	0	52.34		1.51									49102		33600
0	8455	hcd	468.2	7405.88	126.128	7401.57	7401.57	0	0	0	0	0	0	0	0	0	0	0	19.35											47602
0	8456	hcd	686.92	4187.18	594.95	0	0	0	0	0	0	0	0	0	0	0	0	0
0	8459	hcd	417.72	171955	376.275	149614	149614	0	2464.39	0	0	0	0	0	0	0	0	0	191.02		3.18									50102		35400
0	8460	hcd	495.92	6593.36	495.832	5744.62	5744.62	0	0	0	0	0	0	0	0	0	0	0	14.44											47202
0	8463	hcd	599.94	7480.85	437.248	3751.85	3751.85	0	0	0	0	0	0	0	0	0	0	0	8.7											48500
0	8464	hcd	670.3	1412.73	642.178	0	0	0	0	0	0	0	0	0	0	0	0	0
0	8465	hcd	437.21	30351.1	126.128	29974.8	29974.8	0	1290.15	0	0	0	0	0	0	0	0	0	82.59		3.66									49706		33500
0	8466	hcd	467.74	7270.4	126.128	7264.36	7264.36	0	0	0	0	0	0	0	0	0	0	0	18.42											47702
0	8469	hcd	404.72	11563.4	126.128	11490.5	11490.5	0	1533.62	0	0	0	0	0	0	0	0	0	33.51		4.65									48106		34800
0	8470	hcd	450.78	9926.32	126.128	9910.42	9910.42	0	0	0	0	0	0	0	0	0	0	0	26.37											47802
0	8473	hcd	482.73	19020	472.288	17240	17240	0	0	0	0	0	0	0	0	0	0	0	44.43											49002
0	8474	hcd	464.14	37528.3	361.025	7082.65	7082.65	0	0	0	0	0	0	0	0	0	0	0	18.06											46702
0	8477	hcd	426.56	56447.7	126.128	55747.5	55747.5	0	2657.87	0	0	0	0	0	0	0	0	0	107.62		5.23									49806		36400
0	8478	hcd	426.2	53032.1	126.128	52563.7	52563.7	0	1066.47	0	0	0	0	0	0	0	0	0	106.3		2.16									49802		34300
0	8479	hcd	570.56	3046.41	388.655	1364.76	1364.76	0	0	0	0	0	0	0	0	0	0	0	3.11											35000
0	8480	hcd	526.92	4137.54	126.128	4015.18	4015.18	0	0	0	0	0	0	0	0	0	0	0	10.12											46600
0	8483	hcd	321.21	25965.7	149.023	14094.9	14094.9	0	918.51	0	0	0	0	0	0	0	0	0	43.48		2.94									48706		34000
0	8486	hcd	600.74	9540.44	693.318	2295.24	2295.24	0	0	0	0	0	0	0	0	0	0	0	5.33											35400
0	8487	hcd	486.99	13640.9	437.732	9332.14	9332.14	0	0	0	0	0	0	0	0	0	0	0	25.64											48502
0	8488	hcd	471.76	174149	587.371	120682	120682	0	1755.97	0	0	0	0	0	0	0	0	0	103.11		1.47									49602		31300
0	8489	hcd	392.89	275915	149.023	136692	136692	0	12114.4	0	0	0	0	0	0	0	0	0	112.05		10.24									49606		46600
0	8492	hcd	345.21	26872.2	126.128	26600.1	26600.1	0	1039.28	0	0	0	0	0	0	0	0	0	79.88		3.24									49906		32100
0	8493	hcd	468.86	7278.08	126.128	7215.62	7215.62	0	0	0	0	0	0	0	0	0	0	0	18.95											47402
0	8494	hcd	400.5	9673.03	175.119	9121.11	9121.11	0	629.69	0	0	0	0	0	0	0	0	0	26.15		1.88									47606		32600
0	8496	hcd	643.3	7882.42	126.128	7747.07	7747.07	0	0	0	0	0	0	0	0	0	0	0	17.12											46302
0	8499	hcd	558.5	14975.9	248.181	6279.48	6279.48	0	0	0	0	0	0	0	0	0	0	0	15.54											47702
0	8500	hcd	589.58	4069.61	248.18	2270.9	2270.9	0	0	0	0	0	0	0	0	0	0	0	5.2											36200
0	8503	hcd	485.49	15895	569.34	10358	10358	0	0	0	0	0	0	0	0	0	0	0	27.3											48302
0	8504	hcd	507.23	8073.04	420.992	1471.62	1471.62	0	0	0	0	0	0	0	0	0	0	0	3.62											36100
0	8507	hcd	335.83	16963	223.064	7943.82	7943.82	0	0	0	0	0	0	0	0	0	0	0	24.59											47402
0	8508	hcd	542.82	5443.68	126.128	5427.38	5427.38	0	0	0	0	0	0	0	0	0	0	0	12.67											45600
0	8510	hcd	551.26	17719	511.28	1846.28	1846.28	0	0	0	0	0	0	0	0	0	0	0	4.42											32900
0	8511	hcd	413.27	6275.84	126.128	6267.02	6267.02	0	0	0	0	0	0	0	0	0	0	0	17.55											46702
0	8512	hcd	408.72	23825.4	149.023	4210.82	4210.82	0	0	0	0	0	0	0	0	0	0	0	12.14											45500
0	8513	hcd	798.86	1687.69	1525.86	0	0	0	0	0	0	0	0	0	0	0	0	0
0	8515	hcd	632.97	27976.9	600.314	18925.2	18925.2	0	721.03	0	0	0	0	0	0	0	0	0	41.61		1.65									48406		34600
0	8516	hcd	474.73	11445.6	126.128	11391.9	11391.9	0	0	0	0	0	0	0	0	0	0	0	27.57											48402
0	8517	hcd	659.59	1316.43	551.281	0	0	0	0	0	0	0	0	0	0	0	0	0
0	8520	hcd	413.19	7843.23	413.266	5834.56	5834.56	0	0	0	0	0	0	0	0	0	0	0	17.59											47102
0	8521	hcd	478.25	19474.8	126.128	19319.2	19319.2	0	0	0	0	0	0	0	0	0	0	0	48.56											49302
0	8522	hcd	495.25	4440.96	126.127	4440.69	4440.69	0	0	0	0	0	0	0	0	0	0	0	10.77											44900
0	8525	hcd	639.3	6230.27	126.128	6141.19	6141.19	0	0	0	0	0	0	0	0	0	0	0	13.71											45900
0	8526	hcd	394.23	42709.3	126.128	42415.2	42415.2	0	2675.82	0	0	0	0	0	0	0	0	0	115.77		7.81									49806		51500
0	8529	hcd	493.57	26483.5	414.245	17731.3	17731.3	0	0	0	0	0	0	0	0	0	0	0	46.22											49202
0	8530	hcd	503.24	42458.7	454.25	28025.3	28025.3	0	707.23	0	0	0	0	0	0	0	0	0	70.76		1.87									49302		33300
0	8532	hcd	367.85	84839.3	456.256	8837.92	8837.92	0	1676.62	0	0	0	0	0	0	0	0	0	10.09		1.96									46204		33300
0	8534	hcd	573.28	18261.2	540.623	13390.2	13390.2	0	0	0	0	0	0	0	0	0	0	0	30.24											48202
0	8537	hcd	527.77	17183.6	126.128	17007.1	17007.1	0	825.36	0	0	0	0	0	0	0	0	0	42.27		2.07									48906		35400
0	8538	hcd	636.25	1434.67	1732.79	1113.87	1113.87	0	0	0	0	0	0	0	0	0	0	0	2.43											36500
0	8542	hcd	431	13290.9	344.976	8733.8	8733.8	0	0	0	0	0	0	0	0	0	0	0	23.57											47502
0	8545	hcd	334.67	11084.7	294.687	9604.29	9604.29	0	807.48	0	0	0	0	0	0	0	0	0	30.21		2.6									48706		33300
0	8546	hcd	684.96	5202.34	359.028	755.04	755.04	0	0	0	0	0	0	0	0	0	0	0	1.71											34200
0	8547	hcd	711.32	2461.67	312.178	1935.84	1935.84	0	0	0	0	0	0	0	0	0	0	0	3.89											33900
0	8549	hcd	548.26	8683.06	494.268	7316.12	7316.12	0	0	0	0	0	0	0	0	0	0	0	17.85											46402
0	8550	hcd	338.22	23739	126.128	23724.2	23724.2	0	644.59	0	0	0	0	0	0	0	0	0	68.99		1.91									49502		33900
0	8553	hcd	758.22	2378.38	388.592	0	0	0	0	0	0	0	0	0	0	0	0	0
0	8554	hcd	344.2	15302.9	126.128	15171.5	15171.5	0	0	0	0	0	0	0	0	0	0	0	46.28											48902
0	8555	hcd	442.69	18445.3	248.18	8160.29	8160.29	0	0	0	0	0	0	0	0	0	0	0	21.23											47002
0	8558	hcd	638.97	3925.26	126.128	3860.34	3860.34	0	0	0	0	0	0	0	0	0	0	0	9.28											52800
0	8559	hcd	603.27	1591.95	532.269	0	0	0	0	0	0	0	0	0	0	0	0	0
0	8561	hcd	359.87	19931.8	126.128	19718	19718	0	0	0	0	0	0	0	0	0	0	0	58.69											49402
0	8562	hcd	431.54	23134.5	126.128	22952.4	22952.4	0	0	0	0	0	0	0	0	0	0	0	62.38											49302
0	8564	hcd	454.88	13820.2	126.128	13818.2	13818.2	0	776.1	0	0	0	0	0	0	0	0	0	35.55		2.05									48206		34500
0	8565	hcd	711.29	6083.96	126.128	6073.45	6073.45	0	0	0	0	0	0	0	0	0	0	0	12.26											45300
0	8568	hcd	630.25	25715	538.273	14160.8	14160.8	0	0	0	0	0	0	0	0	0	0	0	31.16											48802
0	8569	hcd	538.5	11325.6	299.062	3276.06	3276.06	0	0	0	0	0	0	0	0	0	0	0	8.31											49800
0	8570	hcd	439.53	7352.67	439.844	5386.31	5386.31	0	0	0	0	0	0	0	0	0	0	0	15.19											46500
0	8571	hcd	685.63	4065.11	272.171	1475.51	1475.51	0	0	0	0	0	0	0	0	0	0	0	3.17											36200
0	8572	hcd	672.99	1471.73	1221.96	967.71	967.71	0	0	0	0	0	0	0	0	0	0	0	2.09											36100
0	8574	hcd	516.21	5453.79	126.128	5273.65	5273.65	506.33	0	0	0	0	0	0	0	0	0	0	13.85	1.29										46600	31600
0	8575	hcd	647.27	5924.49	126.128	5909.02	5909.02	0	0	0	0	0	0	0	0	0	0	0	12.75											45400
0	8578	hcd	600.59	3701.72	126.128	3636.41	3636.41	0	0	0	0	0	0	0	0	0	0	0	8.6											52700
0	8582	hcd	399.72	4896.87	126.128	4826.87	4826.87	0	0	0	0	0	0	0	0	0	0	0	14.32											47100
0	8583	hcd	400.95	8852.4	126.128	8771.66	8771.66	0	0	0	0	0	0	0	0	0	0	0	25.01											48002
0	8584	hcd	600.25	3988.71	126.128	3984.11	3984.11	0	0	0	0	0	0	0	0	0	0	0	9.07											46000
0	8585	hcd	449.12	12412.7	363.023	7048.55	7048.55	0	804.66	0	0	0	0	0	0	0	0	0	18.82		2.12									47406		34500
0	8590	hcd	475.76	45262.8	126.128	44975.1	44975.1	0	2094.54	0	0	0	0	0	0	0	0	0	121.49		5.67									49706		35400
0	8591	hcd	534.26	12663	126.128	12608.1	12608.1	0	663.76	0	0	0	0	0	0	0	0	0	30.41		1.67									47906		33400
0	8597	hcd	514.23	6242.03	272.171	4686.83	4686.83	0	0	0	0	0	0	0	0	0	0	0	11.96											46000
0	8598	hcd	545.91	4886.13	491.911	3570.36	3570.36	0	0	0	0	0	0	0	0	0	0	0	8.84											48700
0	8599	hcd	405.52	11667.5	126.128	11588.9	11588.9	0	609.43	0	0	0	0	0	0	0	0	0	33.05		1.76									48206		37500
0	8602	hcd	439.72	24905.6	126.128	24547.3	24547.3	0	919.46	0	0	0	0	0	0	0	0	0	68.01		2.5									49406		34400
0	8603	hcd	345.72	13471.3	126.128	13398.3	13398.3	0	557.9	0	0	0	0	0	0	0	0	0	40.09		1.71									48706		34400
0	8606	hcd	646.98	7881.82	126.128	7770.91	7770.91	0	0	0	0	0	0	0	0	0	0	0	17.36											46302
0	8607	hcd	432.89	19113.5	126.128	18887.9	18887.9	0	993.2	0	0	0	0	0	0	0	0	0	52.24		2.81									49402		33500
0	8608	hcd	490.46	5741.19	126.128	5699.26	5699.26	0	0	0	0	0	0	0	0	0	0	0	14.75											46302
0	8613	hcd	566.62	3878.57	126.128	3778.84	3778.84	0	0	0	0	0	0	0	0	0	0	0	8.97											46100
0	8616	hcd	351.21	18685.7	126.128	18540.3	18540.3	0	851.08	0	0	0	0	0	0	0	0	0	55.86		2.54									49406		36600
0	8617	hcd	343.87	14171.2	126.128	14126.4	14126.4	0	0	0	0	0	0	0	0	0	0	0	43.49											48802
0	8618	hcd	435.22	15224.6	126.128	15151.8	15151.8	0	0	0	0	0	0	0	0	0	0	0	40.65											48602
0	8619	hcd	402.72	13565.4	126.128	13497.6	13497.6	0	0	0	0	0	0	0	0	0	0	0	37.74											48602
0	8621	hcd	377.19	5769.8	126.128	5702.97	5702.97	0	0	0	0	0	0	0	0	0	0	0	16.86											46402
0	8623	hcd	680.28	14131.6	453.748	0	0	0	0	0	0	0	0	0	0	0	0	0
0	8624	hcd	538.16	12108.5	299.062	1662.32	1662.32	0	0	0	0	0	0	0	0	0	0	0	3.94											35300
0	8626	hcd	511.96	12534.3	438.727	10628.7	10628.7	0	0	0	0	0	0	0	0	0	0	0	25.75											48002
0	8628	hcd	614.96	12283	582.3	6479.52	6479.52	0	0	0	0	0	0	0	0	0	0	0	15.21											46800
0	8629	hcd	408.96	18692.5	149.023	10518.8	10518.8	0	674.17	0	0	0	0	0	0	0	0	0	30.48		2.03									48506		35800
0	8630	hcd	694.32	1661.24	1281.85	691.77	691.77	0	0	0	0	0	0	0	0	0	0	0	1.44											35100
0	8639	hcd	506.27	11454	786.421	4921.06	4921.06	0	0	0	0	0	0	0	0	0	0	0	12.74											44800
0	8640	hcd	567.29	9351.36	126.128	9233.75	9233.75	0	0	0	0	0	0	0	0	0	0	0	22.5											47702
0	8641	hcd	431.07	22144.5	126.128	22085.9	22085.9	0	743.42	0	0	0	0	0	0	0	0	0	57.71		1.96									49306		34200
0	8644	hcd	349.82	11537.2	286.151	4318.35	4318.35	0	0	0	0	0	0	0	0	0	0	0	13.1											45600
0	8645	hcd	524.23	9545.47	475.241	3334.78	3334.78	0	0	0	0	0	0	0	0	0	0	0	8.07											52800
0	8649	hcd	465.7	7357.44	126.128	7191.71	7191.71	0	657.85	0	0	0	0	0	0	0	0	0	19.03		1.7									46606		35200
0	8652	hcd	463.22	72937.8	360.029	24046.3	24046.3	0	1226.16	0	0	0	0	0	0	0	0	0	65.55		3.45									49106		34300
0	8653	hcd	579.77	1557.01	681.365	0	0	0	0	0	0	0	0	0	0	0	0	0
0	8656	hcd	403.12	20907.3	402.724	8198.57	8198.57	0	727.39	0	0	0	0	0	0	0	0	0	23.53		2.16									47406		34200
0	8657	hcd	337.2	10257.5	126.128	10106.7	10106.7	0	0	0	0	0	0	0	0	0	0	0	32.14											48102
0	8658	hcd	459.17	22677.6	225.043	4761.17	4761.17	0	0	0	0	0	0	0	0	0	0	0	12.51											45400
0	8661	hcd	346.17	10320	126.128	10211.5	10211.5	0	484.66	0	0	0	0	0	0	0	0	0	31.44		1.51									48606		32600
0	8662	hcd	442.71	100734	402.73	82408.2	82408.2	0	2288.41	0	0	0	0	0	497.67	0	0	0	178.67		5.07									50302		35900
0	8663	hcd	424.72	8662	470.271	7792.23	7792.23	0	0	0	0	0	0	0	0	0	0	0	21.61											47502
0	8666	hcd	479.48	6165.68	126.128	6141.42	6141.42	0	0	0	0	0	0	0	0	0	0	0	17.21											46702
0	8667	hcd	487.51	9952.28	126.128	9940.21	9940.21	0	0	0	0	0	0	0	0	0	0	0	24.78											48502
0	8669	hcd	362.22	132334	126.128	130593	130593	0	5299.48	0	0	0	0	0	0	0	0	0	198.57		7.99									50206		47600
0	8670	hcd	333.17	18484.1	220.124	4152.96	4152.96	0	0	0	0	0	0	0	0	0	0	0	12.9											46600
0	8671	hcd	480.5	6370.73	126.128	6336.4	6336.4	0	0	0	0	0	0	0	0	0	0	0	16.99											46202
0	8672	hcd	775.83	1378.77	669.977	0	0	0	0	0	0	0	0	0	0	0	0	0
0	8674	hcd	323.21	32964.1	447.312	19490.8	19490.8	0	0	0	0	0	0	0	0	0	0	0	65.81											49202
0	8677	hcd	378.19	16150.3	338.203	8486.38	8486.38	0	531.98	0	0	0	0	0	0	0	0	0	24.44		1.57									47906		32600
0	8682	hcd	421.54	10087	126.128	10074.1	10074.1	0	0	0	0	0	0	0	0	0	0	0	27.58											47502
0	8685	hcd	316.21	22915.4	299.062	12031.8	12031.8	0	531.85	0	0	0	0	0	0	0	0	0	37.75		1.66									49306		34900
0	8686	hcd	569.5	1611.11	388.591	1457.25	1457.25	0	0	0	0	0	0	0	0	0	0	0	3.42											36500
0	8687	hcd	405.19	10168.2	126.128	9972.22	9972.22	0	0	0	0	0	0	0	0	0	0	0	29.53											48302
0	8688	hcd	617.27	1323.36	1238.28	1188.58	1188.58	0	0	0	0	0	0	0	0	0	0	0	2.58											33400
0	8691	hcd	662.28	2224.96	126.128	2215.32	2215.32	0	0	0	0	0	0	0	0	0	0	0	4.9											34900
0	8694	hcd	499.24	39273.6	459.261	7894.17	7894.17	0	0	0	0	0	0	0	0	0	0	0	19.71											47702
0	8695	hcd	459.88	10233.4	225.043	6623.57	6623.57	0	0	0	0	0	0	0	0	0	0	0	17.81											47002
0	8696	hcd	664.3	2094.44	388.612	904.27	904.27	0	0	0	0	0	0	0	0	0	0	0	2											33200
0	8697	hcd	489.74	7660.01	126.128	7582.52	7582.52	0	0	0	0	0	0	0	0	0	0	0	19.11											48002
0	8700	hcd	509.24	7713.55	460.251	6939	6939	0	0	0	0	0	0	0	0	0	0	0	17.39											47802
0	8701	hcd	582.27	3862.82	126.128	3598.78	3598.78	0	0	0	0	0	0	0	0	0	0	0	8.98											51000
0	8702	hcd	560.25	3494.55	388.614	1944.65	1944.65	0	0	0	0	0	0	0	0	0	0	0	4.74											35200
0	8703	hcd	601.28	2283.42	126.128	2227.4	2227.4	0	0	0	0	0	0	0	0	0	0	0	4.92											35900
0	8706	hcd	605.76	16251.3	507.785	9819.87	9819.87	0	0	0	0	0	0	0	0	0	0	0	22.08											47202
0	8709	hcd	472.94	19251.5	399.454	10644.1	10644.1	0	633.32	0	0	0	0	0	0	0	0	0	27.31		1.71									48306		35100
0	8710	hcd	435.23	15306.9	126.128	15296	15296	0	886.66	0	0	0	0	0	0	0	0	0	41.19		2.5									48706		34200
0	8713	hcd	616.93	1986.91	388.61	0	0	0	0	0	0	0	0	0	0	0	0	0
0	8714	hcd	323.23	21554.1	447.313	15318.2	15318.2	0	0	0	0	0	0	0	0	0	0	0	47.8											48802
0	8717	hcd	404.18	28031.5	338.859	12796.5	12796.5	0	0	0	0	0	0	0	0	0	0	0	37.77											48702
0	8718	hcd	564.22	5888.62	892.391	1279.48	1279.48	0	0	0	0	0	0	0	0	0	0	0	3.19											34500
0	8719	hcd	529.73	4586.39	126.127	4493.36	4493.36	0	0	0	0	0	0	0	0	0	0	0	11.24											46300
0	8722	hcd	364.54	6743.54	126.128	6680.05	6680.05	0	417.88	0	0	0	0	0	0	0	0	0	20.66		1.28									47806		35000
0	8723	hcd	467.57	4693.86	126.128	4594.45	4594.45	0	0	0	0	0	0	0	0	0	0	0	12.28											45700
0	8724	hcd	590.24	18333.6	248.181	6791.15	6791.15	0	0	0	0	0	0	0	0	0	0	0	15.69											47102
0	8725	hcd	456.2	10621.8	126.128	10612.1	10612.1	0	752.79	0	0	0	0	0	0	0	0	0	28		1.99									47906		36900
0	8729	hcd	415.73	9098.62	126.128	8949.42	8949.42	0	0	0	0	0	0	0	0	0	0	0	26.24											47802
0	8730	hcd	682.61	2401.77	239.095	1323.26	1323.26	0	0	0	0	0	0	0	0	0	0	0	2.8											34600
0	8733	hcd	586.59	1883.51	126.128	1874.77	1874.77	0	0	0	0	0	0	0	0	0	0	0	4.25											33900
0	8736	hcd	435.02	11931.8	385.708	9526.44	9526.44	0	0	0	0	0	0	0	0	0	0	0	25.81											47902
0	8742	hcd	515.23	7248.59	482.575	6942.84	6942.84	0	0	0	0	0	0	0	0	0	0	0	17.47											46202
0	8743	hcd	468.9	11164.5	126.128	11151.2	11151.2	0	0	0	0	0	0	0	0	0	0	0	29.52											48302
0	8745	hcd	450.78	9474.33	126.128	9386.86	9386.86	0	720.39	0	0	0	0	0	0	0	0	0	25.77		2.04									48106		33800
0	8746	hcd	599.94	1677.44	126.128	1665.29	1665.29	0	0	0	0	0	0	0	0	0	0	0	3.56											34500
0	8748	hcd	482.73	12126.3	126.128	11989.7	11989.7	0	771.83	0	0	0	0	0	0	0	0	0	30.85		1.98									48206		36000
0	8751	hcd	679.53	2001.16	388.639	0	0	0	0	0	0	0	0	0	0	0	0	0
0	8752	hcd	617.76	2052.18	388.606	1826.88	1826.88	0	0	0	0	0	0	0	0	0	0	0	4.08											32300
0	8753	hcd	618.27	3543.13	569.279	942.94	942.94	0	0	0	0	0	0	0	0	0	0	0	2.17											33700
0	8756	hcd	426.56	17416.1	126.128	17151.3	17151.3	0	801.88	0	0	0	0	0	0	0	0	0	46.77		2.28									48706		31800
0	8757	hcd	321.21	26630.1	149.023	23816.2	23816.2	0	630.34	0	0	0	0	0	0	0	0	0	76.72		2.08									49502		35000
0	8758	hcd	439.6	29964.7	136.062	10068.2	10068.2	0	0	0	0	0	0	0	0	0	0	0	26.32											47802
0	8761	hcd	564.92	3162.48	388.612	1832.29	1832.29	0	0	0	0	0	0	0	0	0	0	0	4.55											34500
0	8762	hcd	552.26	3558.85	590.286	1351.94	1351.94	0	0	0	0	0	0	0	0	0	0	0	3.25											35700
0	8763	hcd	526.92	3583.94	126.128	3416.45	3416.45	0	0	0	0	0	0	0	0	0	0	0	9.06											53900
0	8764	hcd	570.56	1453.72	1551.84	1055.13	1055.13	0	0	0	0	0	0	0	0	0	0	0	2.55											34100
0	8767	hcd	430.24	75367.7	126.128	74411.2	74411.2	0	1626.45	0	0	0	0	0	0	0	0	0	203.58		4.58									50102		36600
0	8768	hcd	327.01	51331.4	174.992	9597.05	9597.05	0	924.16	0	0	0	0	0	0	0	0	0	29.16		2.92									48506		32700
0	8770	hcd	643.3	6465.07	126.128	6430.59	6430.59	0	0	0	0	0	0	0	0	0	0	0	14.48											46200
0	8771	hcd	409.55	9523.35	126.128	9472.05	9472.05	0	0	0	0	0	0	0	0	0	0	0	25.82											47802
0	8774	hcd	558.75	8722.29	248.18	6105.37	6105.37	0	0	0	0	0	0	0	0	0	0	0	14.3											46302
0	8775	hcd	414.22	16521.8	523.304	3625.34	3625.34	0	0	0	0	0	0	0	0	0	0	0	10.23											48200
0	8776	hcd	436.4	10193.6	126.128	10159.5	10159.5	0	0	0	0	0	0	0	0	0	0	0	26.95											47702
0	8778	hcd	485.23	161307	569.34	94271.9	94271.9	0	0	0	0	0	0	0	0	0	0	0	54.15											49502
0	8779	hcd	596.05	8634.94	248.18	3912.55	3912.55	0	0	0	0	0	0	0	0	0	0	0	9.04											46500
0	8780	hcd	393.83	25824.5	149.023	21237.3	21237.3	0	731.51	0	0	0	0	0	0	0	0	0	58.28		2.12									49106		32400
0	8784	hcd	532.22	16610.2	443.248	3515.84	3515.84	0	0	0	0	0	0	0	0	0	0	0	8.92											49400
0	8785	hcd	399.17	7608.98	126.128	7503.67	7503.67	0	0	0	0	0	0	0	0	0	0	0	21.38											47002
0	8786	hcd	351.93	14538.1	126.128	14322.2	14322.2	0	792.89	0	0	0	0	0	0	0	0	0	42.96		2.46									49006		32300
0	8787	hcd	423.95	5616.95	126.128	5580.45	5580.45	0	0	0	0	0	0	0	0	0	0	0	15.06											46502
0	8789	hcd	698.28	2361.25	600.301	1612.83	1612.83	0	0	0	0	0	0	0	0	0	0	0	3.26											33600
0	8790	hcd	561.74	3250.65	388.568	2148.14	2148.14	0	0	0	0	0	0	0	0	0	0	0	5.37											37000
0	8791	hcd	547.23	5269.16	767.414	4095.24	4095.24	0	0	0	0	0	0	0	0	0	0	0	9.73											44600
0	8794	hcd	413.19	16323.8	466.277	10288.9	10288.9	0	0	0	0	0	0	0	0	0	0	0	30											48102
0	8795	hcd	632.64	27941.5	583.799	6225.83	6225.83	0	0	0	0	0	0	0	0	0	0	0	13.99											45400
0	8796	hcd	422.19	11949.3	126.128	11932.6	11932.6	0	0	0	0	0	0	0	0	0	0	0	31.91											48502
0	8799	hcd	526.59	1818.86	126.128	1800.56	1800.56	0	0	0	0	0	0	0	0	0	0	0	4.51											36200
0	8800	hcd	545.25	19526.2	442.195	9706.66	9706.66	0	0	0	0	0	0	0	0	0	0	0	23.62											47802
0	8803	hcd	493.57	23439.6	428.252	17803.2	17803.2	0	1596.13	0	0	0	0	0	0	0	0	0	44.76		4.04									49206		34100
0	8804	hcd	607.28	19276.2	509.298	13597	13597	0	0	0	0	0	0	0	0	0	0	0	29.75											47902
0	8807	hcd	573.62	9699.54	126.128	9426.96	9426.96	0	798.16	0	0	0	0	0	0	0	0	0	21.71		1.87									47806		35000
0	8812	hcd	635.58	3619.53	516.267	1583.79	1583.79	0	0	0	0	0	0	0	0	0	0	0	3.77											34800
0	8813	hcd	434.7	98279	385.708	22357.5	22357.5	0	0	0	0	0	0	0	0	0	0	0	25.27											47802
0	8816	hcd	504.99	30860.7	418.995	5395.74	5395.74	0	0	0	0	0	0	0	0	0	0	0	13.21											46900
0	8817	hcd	365.7	11743.6	126.128	11654.5	11654.5	0	0	0	0	0	0	0	0	0	0	0	35.15											48202
0	8820	hcd	394.23	32105.1	126.128	31789.5	31789.5	0	1307.73	0	0	0	0	0	0	0	0	0	89.23		3.71									49806		34300
0	8821	hcd	577.24	4500.5	227.132	1332.87	1332.87	0	0	0	0	0	0	0	0	0	0	0	3.11											34600
0	8822	hcd	572.23	21878.9	584.316	1189.1	1189.1	0	0	0	0	0	0	0	0	0	0	0	2.82											32800
0	8823	hcd	693.29	1222.66	985.992	0	0	0	0	0	0	0	0	0	0	0	0	0
0	8825	hcd	548.26	6430.48	494.27	6253.34	6253.34	0	0	0	0	0	0	0	0	0	0	0	14.95											46902
0	8826	hcd	381.18	37912.2	381.25	28939.8	28939.8	0	0	0	0	0	0	0	0	0	0	0	81.65											49902
0	8829	hcd	477.04	25508.1	248.181	17446.5	17446.5	0	0	0	0	0	0	0	0	0	0	0	46.5											49102
0	8830	hcd	498.46	48311.3	498.269	22323.4	22323.4	0	601.82	0	0	0	0	0	0	0	0	0	54.99		1.49									48902		33200
0	8832	hcd	638.3	1510.25	883.342	992.04	992.04	0	0	0	0	0	0	0	0	0	0	0	2.06											35400
0	8835	hcd	542.82	7604.86	493.835	6417.53	6417.53	0	0	0	0	0	0	0	0	0	0	0	16.31											45902
0	8836	hcd	528.73	5400.12	488.75	4151.5	4151.5	0	0	0	0	0	0	0	0	0	0	0	10.21											47400
0	8837	hcd	499.64	7623.36	126.128	7616.84	7616.84	0	1072.01	0	0	0	0	0	0	0	0	0	18.95		2.74									46206		34800
0	8839	hcd	454.38	7034.49	126.128	6976.46	6976.46	0	0	0	0	0	0	0	0	0	0	0	18.76											47202
0	8840	hcd	580.61	2136.47	126.128	2135.09	2135.09	0	0	0	0	0	0	0	0	0	0	0	4.54											34900
0	8842	hcd	630.25	20037.9	538.273	7127.65	7127.65	0	0	0	0	0	0	0	0	0	0	0	16.02											47102
0	8843	hcd	690.79	1403.67	478.769	0	0	0	0	0	0	0	0	0	0	0	0	0
0	8846	hcd	538.75	7826.23	248.18	4362.42	4362.42	0	0	0	0	0	0	0	0	0	0	0	10.59											46000
0	8851	hcd	378.56	13215.5	126.128	13189.3	13189.3	0	763.47	0	0	0	0	0	0	0	0	0	37.31		2.24									48406		32700
0	8854	hcd	336.84	10985.6	126.128	10851.4	10851.4	0	0	0	0	0	0	0	0	0	0	0	33.9											48602
0	8855	hcd	525.76	3763.18	467.763	1894.42	1894.42	0	0	0	0	0	0	0	0	0	0	0	4.89											35200
0	8856	hcd	323.85	16577	126.128	16536.8	16536.8	0	0	0	0	0	0	0	0	0	0	0	52.1											49102
0	8859	hcd	352.83	7199.38	395.203	5202.36	5202.36	0	599.16	0	0	0	0	0	0	0	0	0	16.28		1.88									45606		31900
0	8860	hcd	316.7	30112.7	126.128	29873.2	29873.2	0	0	0	0	0	0	0	0	0	0	0	88.03											49902
0	8863	hcd	827.33	2198.63	897.431	0	0	0	0	0	0	0	0	0	0	0	0	0
0	8864	hcd	531.59	8317.43	126.128	8313.42	8313.42	0	0	0	0	0	0	0	0	0	0	0	19.82											46802
0	8867	hcd	664.95	2254.46	557.811	2048.24	2048.24	0	0	0	0	0	0	0	0	0	0	0	4.56											35200
0	8868	hcd	546.76	18840.6	248.18	9276.61	9276.61	0	0	0	0	0	0	0	0	0	0	0	22.74											48102
0	8871	hcd	540.22	4815.83	126.128	4810.49	4810.49	0	0	0	0	0	0	0	0	0	0	0	11.45											44900
0	8874	hcd	439.72	12411.2	439.844	8905.21	8905.21	0	0	0	0	0	0	0	0	0	0	0	24.24											47702
0	8875	hcd	502.24	7639.47	126.128	7540.83	7540.83	0	544.51	0	0	0	0	0	0	0	0	0	19.04		1.35									47206		37100
0	8878	hcd	646.64	87416.2	126.128	87348.2	87348.2	0	2552.86	0	0	0	0	0	0	0	0	0	88.55		2.59									49302		35900
0	8879	hcd	556.23	5309.61	126.127	5192.15	5192.15	0	0	0	0	0	0	0	0	0	0	0	13.31											46000
0	8882	hcd	324.21	81108.2	126.128	79753.8	79753.8	0	3596.23	0	0	0	0	0	0	0	0	0	243.66		11									50606		45600
0	8883	hcd	590.74	3682.32	126.128	3505.31	3505.31	0	0	0	0	0	0	0	0	0	0	0	8.13											52900
0	8885	hcd	496.23	6999.31	495.834	5317.75	5317.75	0	0	0	0	0	0	0	0	0	0	0	13.57											46300
0	8886	hcd	741.97	9822.51	299.062	0	0	0	0	0	0	0	0	0	0	0	0	0
0	8887	hcd	556.48	6498.44	403.861	3777.15	3777.15	0	0	0	0	0	0	0	0	0	0	0	9.31											45900
0	8888	hcd	857.67	1998.94	2260	0	0	0	0	0	0	0	0	0	0	0	0	0
0	8891	hcd	552.23	1802.28	638.312	1449	1449	0	0	0	0	0	0	0	0	0	0	0	3.64											36100
0	8892	hcd	587.82	10566.3	517.826	4776.39	4776.39	0	0	0	0	0	0	0	0	0	0	0	11.15											43500
0	8893	hcd	569.25	2159.65	126.128	2116.77	2116.77	0	0	0	0	0	0	0	0	0	0	0	5.02											35400
0	8896	hcd	564.87	7097.97	467.277	3698.67	3698.67	0	0	0	0	0	0	0	0	0	0	0	9.95											54600
0	8897	hcd	446.73	369008	126.128	364640	364640	0	0	0	0	0	0	0	0	0	0	0	170.12											50202
0	8899	hcd	511.96	14892.5	126.128	14892.5	14892.5	0	0	0	0	0	0	0	0	0	0	0	38.89											48402
0	8900	hcd	338.22	51232.1	126.128	51088.3	51088.3	0	1111.76	0	0	0	0	0	0	0	0	0	149.68		3.42									50002		33400
0	8902	hcd	615.3	2299.19	582.634	1846.48	1846.48	0	0	0	0	0	0	0	0	0	0	0	4.32											34000
0	8903	hcd	838.32	9302.3	789.337	0	0	0	0	0	0	0	0	0	0	0	0	0
0	8904	hcd	570.2	3713.81	126.128	3690.51	3690.51	0	0	0	0	0	0	0	0	0	0	0	8.26											46200
0	8907	hcd	377.19	8218.81	126.128	8111.55	8111.55	0	0	0	0	0	0	0	0	0	0	0	25.24											47602
0	8908	hcd	583.8	6720.02	126.128	6687.55	6687.55	0	0	0	0	0	0	0	0	0	0	0	16.3											46802
0	8909	hcd	682.95	2248.33	584.971	1449.88	1449.88	0	0	0	0	0	0	0	0	0	0	0	3											36000
0	8913	hcd	359.21	43867	126.128	43660	43660	0	754.73	0	0	0	0	0	0	0	0	0	132.8		2.28									50002		33600
0	8914	hcd	400.95	4943.44	126.128	4938.43	4938.43	0	0	0	0	0	0	0	0	0	0	0	13.71											45800
0	8916	hcd	569.53	5155.94	126.128	5050.59	5050.59	0	0	0	0	0	0	0	0	0	0	0	12.43											46100
0	8917	hcd	364.84	11398	126.128	11324.7	11324.7	0	995.92	0	0	0	0	0	0	0	0	0	34.01		2.99									48806		35400
0	8918	hcd	538.22	7928.9	299.062	3327.66	3327.66	0	0	0	0	0	0	0	0	0	0	0	8.11											51700
0	8920	hcd	663.8	6080.59	614.832	2087.88	2087.88	0	0	0	0	0	0	0	0	0	0	0	4.66											35100
0	8921	hcd	809.33	1670.11	999.598	986.17	986.17	0	0	0	0	0	0	0	0	0	0	0	1.88											34900
0	8924	hcd	604.26	1874.04	626.334	0	0	0	0	0	0	0	0	0	0	0	0	0
0	8925	hcd	431.54	16770.6	126.128	16552.4	16552.4	0	759.88	0	0	0	0	0	0	0	0	0	47.3		2.19									49206		34700
0	8926	hcd	577.57	4841.24	678.356	877.41	877.41	0	0	0	0	0	0	0	0	0	0	0	2.09											33900
0	8929	hcd	437.72	9514.14	126.128	9409.87	9409.87	0	0	0	0	0	0	0	0	0	0	0	26.12											48402
0	8930	hcd	552.74	4789.99	126.128	4756.64	4756.64	0	0	0	0	0	0	0	0	0	0	0	11.88											45400
0	8931	hcd	573.26	41458.1	524.266	30007.5	30007.5	0	0	0	0	0	0	0	0	0	0	0	69.08											49502
0	8932	hcd	561.49	1851.44	512.308	1445.8	1445.8	0	0	0	0	0	0	0	0	0	0	0	3.26											32300
0	8935	hcd	439.73	20109.6	126.128	19723.4	19723.4	0	1227.47	0	0	0	0	0	0	0	0	0	55.44		3.46									49706		33700
0	8938	hcd	541.95	7009.95	126.128	6714.38	6714.38	0	0	0	0	0	0	0	0	0	0	0	17.21											47002
0	8939	hcd	424.72	14766.3	126.128	14527.9	14527.9	0	856.87	0	0	0	0	0	0	0	0	0	40.78		2.42									48906		34700
0	8940	hcd	398.23	93624	136.076	78612.3	78612.3	0	3018.27	0	0	0	0	0	0	0	0	0	225.7		9.31									50406		50300
0	8941	hcd	349.53	13716.4	376.276	12998	12998	0	0	0	0	0	0	0	0	0	0	0	38.92											48702
0	8944	hcd	362.22	119084	126.128	116981	116981	0	2870.3	0	0	0	0	0	0	0	0	0	198.67		5.01									50302		38600
0	8945	hcd	479.22	9391.09	126.128	9252.48	9252.48	0	0	0	0	0	0	0	0	0	0	0	23.18											47802
0	8948	hcd	669.61	8683.63	359.029	5624.53	5624.53	0	0	0	0	0	0	0	0	0	0	0	12.9											44700
0	8949	hcd	386.73	154128	547.34	51333.4	51333.4	0	1036.63	0	0	0	0	0	0	0	0	0	106.15		2.15									50102		34900
0	8950	hcd	487.75	12551.2	126.128	12351.3	12351.3	0	0	0	0	0	0	0	0	0	0	0	33.16											48902
0	8951	hcd	502.21	9844.56	126.128	9744.14	9744.14	0	0	0	0	0	0	0	0	0	0	0	24.56											47502
0	8952	hcd	565.95	5669.5	126.128	5568.59	5568.59	0	0	0	0	0	0	0	0	0	0	0	12.72											46600
0	8954	hcd	657.62	2476.34	388.525	1578	1578	0	0	0	0	0	0	0	0	0	0	0	3.37											34700
0	8955	hcd	638.97	1870.89	388.492	1529.24	1529.24	0	0	0	0	0	0	0	0	0	0	0	3.41											35500
0	8956	hcd	441.52	9332.24	126.128	9332.24	9332.24	0	671.32	0	0	0	0	0	0	0	0	0	24.77		1.85									48206		33600
0	8960	hcd	516.21	11001.2	126.128	10913.3	10913.3	0	587.5	0	0	0	0	0	0	0	0	0	27.28		1.45									48106		33200
0	8961	hcd	585.24	7754.64	584.799	1832.37	1832.37	0	638.64	0	0	0	0	0	0	0	0	0	4.52		1.55									35500		33000
0	8962	hcd	661.77	7160.89	563.796	862.65	862.65	0	0	0	0	0	0	0	0	0	0	0	1.83											33200
0	8965	hcd	480.5	9252.62	126.128	9128.48	9128.48	0	509.65	0	0	0	0	0	0	0	0	0	23.8		1.31									47706		36200
0	8966	hcd	415.88	23841.5	126.128	23649.3	23649.3	0	1027.51	0	0	0	0	0	0	0	0	0	67.86		3.02									49706		29700
0	8967	hcd	502.71	15211.6	440.236	13384.9	13384.9	0	856.13	0	0	0	0	0	0	0	0	0	34.14		2.24									48406		33500
0	8968	hcd	731.82	1622.28	2029.3	0	0	0	0	0	0	0	0	0	0	0	0	0
0	8971	hcd	558.93	13151.8	520.599	12698.4	12698.4	0	685.33	0	0	0	0	0	0	0	0	0	29.66		1.65									48606		32700
0	8972	hcd	640.25	4114.77	631.314	1328.65	1328.65	0	0	0	0	0	0	0	0	0	0	0	2.85											34300
0	8973	hcd	615.62	4606.24	126.128	4544.15	4544.15	0	0	0	0	0	0	0	0	0	0	0	10.25											46500
0	8976	hcd	344.46	12620.9	174.992	10133.1	10133.1	0	0	0	0	0	0	0	0	0	0	0	31.83											48702
0	8977	hcd	580.95	3609.77	126.128	3494.8	3494.8	0	0	0	0	0	0	0	0	0	0	0	8.33											51900
0	8981	hcd	647.98	64432.5	126.128	63385.4	63385.4	0	2682.88	0	0	0	0	0	0	0	0	0	56.99		2.5									49006		34000
0	8982	hcd	564.25	13287.1	126.128	13170	13170	0	0	0	0	0	0	0	0	0	0	0	31.65											48602
0	8983	hcd	675.42	8512.55	675.423	1836.1	1836.1	0	0	0	0	0	0	0	0	0	0	0	3.87											33400
0	8986	hcd	472.94	14653.5	399.455	11954.3	11954.3	0	0	0	0	0	0	0	0	0	0	0	32.95											48502
0	8987	hcd	423.44	34526.3	423.237	29187	29187	0	553.15	0	0	0	0	0	0	0	0	0	80.3		1.56									49702		34300
0	8988	hcd	470.36	4386.29	126.128	4366.16	4366.16	0	0	0	0	0	0	0	0	0	0	0	11.52											45700
0	8989	hcd	459.88	9168.25	225.043	5928.6	5928.6	0	0	0	0	0	0	0	0	0	0	0	16.07											46902
0	8991	hcd	540.58	12733.4	126.128	12600.3	12600.3	0	583.29	0	0	0	0	0	0	0	0	0	32.02		1.46									48402		35000
0	8992	hcd	575.25	2233.01	126.128	2223.32	2223.32	0	0	0	0	0	0	0	0	0	0	0	5.19											35800
0	8995	hcd	530.48	11184.3	126.128	10928.4	10928.4	0	0	0	0	0	0	0	0	0	0	0	28.87											48202
0	8996	hcd	406.46	11562.9	466.277	9750.65	9750.65	0	0	0	0	0	0	0	0	0	0	0	28.82											48302
0	8997	hcd	500.89	13113.2	272.172	10149.9	10149.9	0	0	0	0	0	0	0	0	0	0	0	24.17											48202
0	8999	hcd	490.34	61756.6	490.339	20188.5	20188.5	0	0	0	0	0	0	0	0	0	0	0	51.05											49002
0	9000	hcd	633.31	10342.1	600.312	5608.51	5608.51	0	0	0	0	0	0	0	0	0	0	0	13.04											46800
0	9001	hcd	340.88	10505.1	126.128	10467	10467	0	593.86	0	0	0	0	0	0	0	0	0	32.61		1.88									48506		35000
0	9004	hcd	367.22	37785.7	126.128	37333.5	37333.5	0	1160.68	0	0	0	0	0	0	0	0	0	112.03		3.55									49802		34100
0	9005	hcd	454.17	8564.13	364.838	6771.12	6771.12	0	0	0	0	0	0	0	0	0	0	0	17.73											47402
0	9007	hcd	625.32	7410.21	126.128	7324.97	7324.97	0	0	0	0	0	0	0	0	0	0	0	16.95											46502
0	9008	hcd	459.49	24765.7	225.043	4415.8	4415.8	0	601.79	0	0	0	0	0	0	0	0	0	10.75		1.45									45504		34000
0	9010	hcd	458.47	15258.5	126.128	15153.4	15153.4	0	841.3	0	0	0	0	0	0	0	0	0	39.48		2.28									48906		32300
0	9011	hcd	540.25	34323.4	126.128	34140.7	34140.7	0	822.17	0	0	0	0	0	0	0	0	0	83.77		2.03									49502		33500
0	9012	hcd	410.55	7711.36	126.128	7663.43	7663.43	0	0	0	0	0	0	0	0	0	0	0	21.47											48002
0	9014	hcd	458.22	15784.7	126.128	15489.9	15489.9	0	0	0	0	0	0	0	0	0	0	0	43.08											49502
0	9015	hcd	341.17	9770.08	370.73	9099.96	9099.96	0	670.11	0	0	0	0	0	0	0	0	0	27.71		2.02									48006		35700
0	9016	hcd	533.19	28594.1	239.095	5283.89	5283.89	0	0	0	0	0	0	0	0	0	0	0	12.88											44900
0	9017	hcd	636.29	6101.8	126.128	6047.13	6047.13	0	0	0	0	0	0	0	0	0	0	0	12.87											46400
0	9019	hcd	751.33	2259.32	388.476	0	0	0	0	0	0	0	0	0	0	0	0	0
0	9020	hcd	586.93	7388.86	126.128	7259.11	7259.11	0	0	0	0	0	0	0	0	0	0	0	16.78											47002
0	9021	hcd	436.87	18232.7	126.128	18163.7	18163.7	0	721.59	0	0	0	0	0	0	0	0	0	49.61		2.06									49006		33400
0	9022	hcd	378.17	15454.9	126.128	15204.4	15204.4	0	542.03	0	0	0	0	0	0	0	0	0	46.24		1.7									49106		32400
0	9023	hcd	314.86	25321.5	126.128	25204.8	25204.8	0	807.4	0	0	0	0	0	0	0	0	0	78.71		2.59									49102		32500
0	9026	hcd	332.67	31022.7	253.492	10438.9	10438.9	0	0	0	0	0	0	0	0	0	0	0	32.48											48702
0	9027	hcd	583.3	5338.29	126.128	5329.83	5329.83	0	0	0	0	0	0	0	0	0	0	0	12.35											46400
0	9029	hcd	466.86	12267.9	126.128	12151.7	12151.7	0	0	0	0	0	0	0	0	0	0	0	31.23											48902
0	9030	hcd	688.23	4086.67	388.439	1056.69	1056.69	0	0	0	0	0	0	0	0	0	0	0	2.2											33000
0	9031	hcd	468.9	14294.5	126.128	14253.7	14253.7	0	906.47	0	0	0	0	0	0	0	0	0	38.86		2.46									48606		36100
0	9032	hcd	464.55	30768.4	361.025	9849.85	9849.85	0	787.42	0	0	0	0	0	0	0	0	0	26.74		2.22									47906		32000
0	9033	hcd	664.33	4610.62	126.128	4609.37	4609.37	0	0	0	0	0	0	0	0	0	0	0	9.93											44200
0	9035	hcd	482.73	16896.8	126.128	16725	16725	0	621.7	0	0	0	0	0	0	0	0	0	43.06		1.6									48606		37400
0	9036	hcd	697.75	2094.36	388.395	834.9	834.9	0	0	0	0	0	0	0	0	0	0	0	1.89											34800
0	9037	hcd	344.72	18033.1	126.128	17998.3	17998.3	0	752.43	0	0	0	0	0	0	0	0	0	54.93		2.42									49406		34200
0	9039	hcd	588.3	8718.62	517.824	7467.73	7467.73	0	0	0	0	0	0	0	0	0	0	0	17.6											47002
0	9040	hcd	688.27	4285.71	246.156	742.47	742.47	0	0	0	0	0	0	0	0	0	0	0	1.53											34800
0	9041	hcd	461.24	102759	126.128	102150	102150	0	1236.31	0	0	0	0	0	0	0	0	0	227.23		2.86									50302		33900
0	9042	hcd	400.21	19783.7	126.128	19594.5	19594.5	0	962.9	0	0	0	0	0	0	0	0	0	56.77		2.78									49706		35000
0	9043	hcd	435.96	21503.4	126.128	21494.5	21494.5	0	3072.54	0	0	0	0	0	0	0	0	0	57.05		8.24									49306		48900
0	9046	hcd	416.2	18403.8	126.128	18228.9	18228.9	0	0	0	0	0	0	0	0	0	0	0	50.91											49002
0	9047	hcd	856.71	1830.01	1563.23	0	0	0	0	0	0	0	0	0	0	0	0	0
0	9048	hcd	443.22	195799	329.193	124776	124776	0	4751.06	0	0	0	0	0	0	0	0	0	56.83		2.15									49306		35300
0	9049	hcd	321.21	24700.4	149.023	19062.4	19062.4	0	0	0	0	0	0	0	0	0	0	0	54.45											49302
0	9052	hcd	482.74	25177.1	328.686	23420.5	23420.5	0	0	0	0	0	0	0	0	0	0	0	59.02											48802
0	9053	hcd	617.25	1613.4	175.119	1228.76	1228.76	0	0	0	0	0	0	0	0	0	0	0	2.67											33700
0	9056	hcd	643.64	9374.58	126.128	9225.07	9225.07	0	0	0	0	0	0	0	0	0	0	0	20.25											47802
0	9057	hcd	517.92	36753.5	485.265	23782	23782	0	571.78	0	0	0	0	0	0	0	0	0	57.8		1.4									49202		31900
0	9058	hcd	728.62	1576.01	1498.68	0	0	0	0	0	0	0	0	0	0	0	0	0
0	9060	hcd	409.75	9397.46	126.128	9392.91	9392.91	0	0	0	0	0	0	0	0	0	0	0	25.41											47502
0	9063	hcd	378.19	34193.9	329.197	23594.6	23594.6	0	613.84	0	0	0	0	0	0	0	0	0	69.8		1.87									49102		31300
0	9064	hcd	485.23	259181	569.34	125237	125237	0	5511.91	0	0	0	0	0	0	0	0	0	46.48		2.11									49206		34900
0	9065	hcd	316.54	35467.8	126.128	35322.9	35322.9	0	1029.79	0	0	0	0	0	0	0	0	0	107.17		3.25									49702		33700
0	9068	hcd	585.78	7951.36	126.128	7914.42	7914.42	0	0	0	0	0	0	0	0	0	0	0	18.35											46502
0	9069	hcd	558.35	5074.18	126.128	5018.47	5018.47	0	0	0	0	0	0	0	0	0	0	0	12.07											45000
0	9070	hcd	364.54	11619.4	126.128	11449.5	11449.5	0	956.13	0	0	0	0	0	0	0	0	0	35.26		3									48706		34000
0	9071	hcd	307.83	8304.63	126.128	8289.97	8289.97	0	0	0	0	0	0	0	0	0	0	0	25.06											48102
0	9074	hcd	596.95	15322.7	126.128	15300.6	15300.6	0	0	0	0	0	0	0	0	0	0	0	36.53											48602
0	9075	hcd	352.44	12832.9	126.128	12720	12720	0	512.38	0	0	0	0	0	0	0	0	0	36.47		1.5									49406		31100
0	9079	hcd	1092.43	3047.37	388.497	0	0	0	0	0	0	0	0	0	0	0	0	0
0	9080	hcd	550.92	3945.43	126.128	3930.02	3930.02	0	0	0	0	0	0	0	0	0	0	0	9.16											46200
0	9083	hcd	526.92	9389.58	461.603	8673.99	8673.99	0	0	0	0	0	0	0	0	0	0	0	21.93											47302
0	9084	hcd	546.74	16943	448.767	13967.7	13967.7	0	0	0	0	0	0	0	0	0	0	0	34.15											48402
0	9085	hcd	413.16	12767.1	413.266	7900.83	7900.83	0	0	0	0	0	0	0	0	0	0	0	21.64											47602
0	9088	hcd	493.57	22175.3	414.245	18774.9	18774.9	0	0	0	0	0	0	0	0	0	0	0	47.28											49302
0	9089	hcd	415.19	13931.4	126.128	13870.2	13870.2	0	585.38	0	0	0	0	0	0	0	0	0	38.88		1.64									48906		33700
0	9090	hcd	447.96	75147.3	304.685	48422.6	48422.6	0	2203.18	0	0	0	0	0	0	0	0	0	110.21		5.11									49706		34400
0	9091	hcd	632.64	8408.31	600.309	4636.51	4636.51	0	0	0	0	0	0	0	0	0	0	0	10.21											44200
0	9094	hcd	435.22	22269	126.128	22115.8	22115.8	0	1194.82	0	0	0	0	0	0	0	0	0	61.15		3.4									49206		32800
0	9095	hcd	573.28	13244.6	126.128	13194.5	13194.5	0	0	0	0	0	0	0	0	0	0	0	32.33											48002
0	9096	hcd	345.16	13567.3	279.843	9026.78	9026.78	0	0	0	0	0	0	0	0	0	0	0	25.7											48602
0	9099	hcd	635.58	4225.24	126.128	4135.85	4135.85	0	0	0	0	0	0	0	0	0	0	0	9.2											45600
0	9100	hcd	364.83	14790.2	126.128	14653.2	14653.2	0	697.94	0	0	0	0	0	0	0	0	0	44.34		2.13									49006		35400
0	9101	hcd	559	8178.13	248.181	5420.15	5420.15	0	0	0	0	0	0	0	0	0	0	0	13.18											45504
0	9102	hcd	555.85	4903.26	490.583	4059.96	4059.96	0	0	0	0	0	0	0	0	0	0	0	9.77											45500
0	9104	hcd	607.77	14723.6	225.043	1632.19	1632.19	0	0	0	0	0	0	0	0	0	0	0	3.66											35300
0	9105	hcd	701.29	1749.45	620.308	0	0	0	0	0	0	0	0	0	0	0	0	0
0	9108	hcd	394.73	146163	126.128	146155	146155	0	5116.03	0	0	0	0	0	0	0	0	0	255.06		9.14									49902		50800
0	9109	hcd	616.29	5202.27	126.128	5148.17	5148.17	0	0	0	0	0	0	0	0	0	0	0	11.76											46400
0	9110	hcd	430.51	11100.1	126.128	11099.5	11099.5	0	521.89	0	0	0	0	0	0	0	0	0	30.35		1.43									48106		37400
0	9113	hcd	416.24	24804.3	126.128	24544.2	24544.2	0	637.26	0	0	0	0	0	0	0	0	0	71.01		1.9									49302		34100
0	9114	hcd	468.23	31397.6	648.331	12302.7	12302.7	0	634.03	0	0	0	0	0	0	0	0	0	31.27		1.6									48806		32300
0	9115	hcd	377.17	17093.1	126.128	17010.3	17010.3	0	709.61	0	0	0	0	0	0	0	0	0	50.9		2.19									49106		32900
0	9116	hcd	350.22	11222	126.128	11217	11217	0	0	0	0	0	0	0	0	0	0	0	32.38											48402
0	9119	hcd	580.25	39515.9	126.128	39455.4	39455.4	0	932.53	0	0	0	0	0	0	0	0	0	92.75		2.3									49602		32700
0	9120	hcd	476.84	31497.5	248.18	16660.4	16660.4	0	968.98	0	0	0	0	0	0	0	0	0	45.17		2.71									49206		34800
0	9121	hcd	504.74	19302.5	433.297	17669.5	17669.5	0	0	0	0	0	0	0	0	0	0	0	45.58											49102
0	9122	hcd	498.46	5998.21	126.128	5995.35	5995.35	0	0	0	0	0	0	0	0	0	0	0	14.84											45902
0	9125	hcd	499.64	7815.88	126.128	7789.36	7789.36	0	0	0	0	0	0	0	0	0	0	0	20.23											47902
0	9126	hcd	619.92	3688.26	527.615	1942.4	1942.4	0	0	0	0	0	0	0	0	0	0	0	4.32											33100
0	9127	hcd	693.79	2072.27	525.314	1902.14	1902.14	0	0	0	0	0	0	0	0	0	0	0	3.93											33500
0	9130	hcd	630.25	16172.3	538.273	7693.49	7693.49	0	0	0	0	0	0	0	0	0	0	0	17.25											46602
0	9131	hcd	690.8	6722.22	126.128	6706.41	6706.41	0	0	0	0	0	0	0	0	0	0	0	14.05											47200
0	9132	hcd	432.26	28410.1	126.128	28066.4	28066.4	0	791.93	0	0	0	0	0	0	0	0	0	77.54		2.19									49702		33000
0	9133	hcd	399.17	12061	126.128	12024.3	12024.3	0	640.55	0	0	0	0	0	0	0	0	0	34.1		1.82									48506		35500
0	9136	hcd	515.23	16969.1	304.162	13710.1	13710.1	0	600.35	0	0	0	0	0	0	0	0	0	35.67		1.63									48906		33000
0	9137	hcd	524.23	8630.1	460.259	5050.32	5050.32	0	0	0	0	0	0	0	0	0	0	0	12.65											44900
0	9138	hcd	538.5	9633.52	299.062	5391.06	5391.06	0	0	0	0	0	0	0	0	0	0	0	13.52											46400
0	9139	hcd	554.28	7538.84	126.128	7518.7	7518.7	0	0	0	0	0	0	0	0	0	0	0	18.25											46802
0	9140	hcd	679.84	5406.34	630.844	1883.39	1883.39	0	0	0	0	0	0	0	0	0	0	0	3.96											33900
0	9143	hcd	607.21	16235.2	225.043	1966.43	1966.43	0	0	0	0	0	0	0	0	0	0	0	4.37											34200
0	9144	hcd	340.19	19748.4	126.128	19612	19612	0	0	0	0	0	0	0	0	0	0	0	59.34											49202
0	9145	hcd	715.31	2413.17	596.323	1016.23	1016.23	0	0	0	0	0	0	0	0	0	0	0	2.15											31900
0	9150	hcd	335.87	29185	126.128	29184.9	29184.9	0	423.87	0	0	0	0	0	0	0	0	0	95.79		1.42									49502		34400
0	9151	hcd	999.42	2973.06	138.055	0	0	0	0	0	0	0	0	0	0	0	0	0
0	9152	hcd	374.1	148028	288.006	27867.7	27867.7	0	3052.16	0	0	0	0	0	0	0	0	0	36.7		3.99									48706		32600
0	9155	hcd	435.74	50790	126.128	50736.9	50736.9	0	5827.13	0	0	0	0	0	0	0	0	0	83.33		9.75									49306		45700
0	9156	hcd	477.21	48151.3	126.128	47980.7	47980.7	0	3947.69	0	0	0	0	0	0	0	0	0	126.06		10.51									49706		47500
0	9157	hcd	571.74	10984.3	490.749	1757.66	1757.66	0	0	0	0	0	0	0	0	0	0	0	4.17											33500
0	9158	hcd	574.25	7820.97	126.128	7795.98	7795.98	0	0	0	0	0	0	0	0	0	0	0	18.47											47902
0	9159	hcd	324.73	20942.8	126.128	20938.8	20938.8	0	882.9	0	0	0	0	0	0	0	0	0	62.42		2.73									49306		35600
0	9161	hcd	611.76	7508.69	355.07	1817.76	1817.76	0	0	0	0	0	0	0	0	0	0	0	4.2											34300
0	9162	hcd	998.76	4713.69	2878.35	0	0	0	0	0	0	0	0	0	0	0	0	0
0	9165	hcd	495.73	8560.64	175.119	5933.17	5933.17	0	0	0	0	0	0	0	0	0	0	0	15.99											46602
0	9166	hcd	643.97	9323.02	126.128	9266.1	9266.1	0	0	0	0	0	0	0	0	0	0	0	20.13											47802
0	9167	hcd	381.25	40617.7	381.25	26685.6	26685.6	0	626.47	0	0	0	0	0	0	0	0	0	80.74		1.89									49602		34000
0	9168	hcd	378.56	16050.3	126.128	15986.7	15986.7	0	815.42	0	0	0	0	0	0	0	0	0	45.95		2.42									48506		33600
0	9171	hcd	646.64	34672	126.128	34409.3	34409.3	0	1406.72	0	0	0	0	0	0	0	0	0	75.9		3.15									49406		34000
0	9172	hcd	454.38	26985.7	276.166	18754.3	18754.3	0	1097.78	0	0	0	0	0	0	0	0	0	52.29		3.11									49206		35000
0	9173	hcd	460.87	58241.6	126.128	57548.1	57548.1	0	3111.17	0	0	0	0	0	0	0	0	0	81.11		4.47									49706		34400
0	9174	hcd	736.81	7488.15	687.826	4603.55	4603.55	0	0	0	0	0	0	0	0	0	0	0	9.06											47500
0	9179	hcd	451.75	19664.4	126.128	19531.5	19531.5	0	544.47	0	0	0	0	0	0	0	0	0	50.27		1.45									49102		31400
0	9182	hcd	335.5	132551	126.128	131630	131630	0	2043.52	0	0	0	0	0	0	0	0	0	223.16		3.52									50102		34000
0	9183	hcd	491.55	17578.3	126.128	17458.7	17458.7	0	0	0	0	0	0	0	0	0	0	0	47.11											49202
0	9184	hcd	660.64	3793.89	622.302	1046.27	1046.27	0	0	0	0	0	0	0	0	0	0	0	2.28											36400
0	9187	hcd	415.86	52114.5	120.081	16596.4	16596.4	0	802.06	0	0	0	0	0	0	0	0	0	46.33		2.26									49106		32000
0	9188	hcd	398.89	18192.8	126.128	18035.2	18035.2	0	874.96	0	0	0	0	0	0	0	0	0	53.37		2.59									48906		35800
0	9189	hcd	579.92	72845.6	126.128	71563	71563	0	1178.68	0	0	0	0	0	0	0	0	0	111.92		1.85									50202		35700
0	9190	hcd	302.19	80163.6	241.66	37959.1	37959.1	0	1043.14	0	0	0	0	0	0	0	0	0	114.25		3.18									50002		34500
0	9192	hcd	511.96	19793.7	462.783	17960.1	17960.1	0	0	0	0	0	0	0	0	0	0	0	46.03											49202
0	9193	hcd	560.74	7086.9	126.128	7086.12	7086.12	0	0	0	0	0	0	0	0	0	0	0	17.15											46602
0	9196	hcd	465.88	12255.1	126.128	12205.5	12205.5	0	737.79	0	0	0	0	0	0	0	0	0	33.82		2.08									48906		32000
0	9197	hcd	533.58	24051.5	239.095	8143.93	8143.93	0	0	0	0	0	0	0	0	0	0	0	20.8											48002
0	9198	hcd	640.82	8558.2	640.823	8153.75	8153.75	0	0	0	0	0	0	0	0	0	0	0	16.59											46902
0	9202	hcd	341.52	18092.2	126.128	18050.6	18050.6	0	864.45	0	0	0	0	0	0	0	0	0	54.89		2.71									49206		34600
0	9206	hcd	509.77	20536.9	126.128	20468.9	20468.9	0	572.56	0	0	0	0	0	0	0	0	0	52.43		1.52									48802		33300
0	9207	hcd	499.25	24586.2	450.256	9337.93	9337.93	0	683.81	0	0	0	0	0	0	0	0	0	24.65		1.81									47706		34100
0	9208	hcd	682.28	2151.17	239.094	1430.41	1430.41	0	0	0	0	0	0	0	0	0	0	0	2.97											35100
0	9211	hcd	437.24	14419.3	126.128	14326.2	14326.2	0	880.52	0	0	0	0	0	0	0	0	0	37.69		2.38									48906		34700
0	9212	hcd	547.77	4114.03	126.128	4110.71	4110.71	0	592.29	0	0	0	0	0	0	0	0	0	10.13		1.51									45104		32000
0	9213	hcd	696.96	1921.08	2082.46	767.3	767.3	0	0	0	0	0	0	0	0	0	0	0	1.54											33400
0	9216	hcd	548.6	4802.15	126.128	4772.19	4772.19	0	0	0	0	0	0	0	0	0	0	0	11.75											45900
0	9217	hcd	638.8	8477.96	272.171	2299.67	2299.67	0	0	0	0	0	0	0	0	0	0	0	5.32											35700
0	9218	hcd	569.25	6179.35	126.128	6154.92	6154.92	0	0	0	0	0	0	0	0	0	0	0	14.6											46700
0	9221	hcd	502.75	701458	126.128	699541	699541	0	10248.4	0	0	0	0	0	0	0	0	0	112.33		1.65									50002		35700
0	9222	hcd	365.21	14791.8	126.128	14786.1	14786.1	0	788.33	0	0	264.1	0	0	0	0	0	0	43.4		2.33									48406		33200
0	9223	hcd	467.75	6528.68	126.128	6521	6521	0	0	0	0	0	0	0	0	0	0	0	18.04											47102
0	9224	hcd	655.17	1665.71	1890.52	1422.68	1422.68	0	0	0	0	0	0	0	0	0	0	0	3											35100
0	9227	hcd	439.25	25898.6	126.128	25846.9	25846.9	0	696.55	0	0	0	0	0	0	0	0	0	70.3		1.91									49402		34600
0	9228	hcd	530.98	8312.92	126.128	8312.73	8312.73	0	0	0	0	0	0	0	0	0	0	0	20.98											47002
0	9229	hcd	752.83	5053.85	703.839	2173.08	2173.08	0	0	0	0	0	0	0	0	0	0	0	4.46											35200
0	9230	hcd	697.29	2017.32	246.156	0	0	0	0	0	0	0	0	0	0	0	0	0
0	9232	hcd	541.61	30355.2	126.128	30327	30327	0	767.34	0	0	0	0	0	0	0	0	0	75.74		1.94									49402		32300
0	9233	hcd	424.72	58665	126.128	58655	58655	0	2220.97	0	0	0	0	0	0	0	0	0	80.23		3.18									49406		33200
0	9234	hcd	434.19	15062.3	272.172	9407.49	9407.49	0	523.63	0	0	0	0	0	0	0	0	0	24.63		1.36									47006		35400
0	9237	hcd	362.22	106698	126.128	106683	106683	0	4225.89	0	0	0	0	0	0	0	0	0	187.45		7.5									50006		46400
0	9238	hcd	437.9	21312.2	126.128	21279.8	21279.8	0	791.78	0	0	0	0	0	0	0	0	0	57.95		2.23									49206		34300
0	9239	hcd	568.21	8817.59	166.114	4218.59	4218.59	0	0	0	0	0	0	0	0	0	0	0	10.13											44500
0	9240	hcd	650.78	6615.07	531.794	1502.51	1502.51	0	0	0	0	0	0	0	0	0	0	0	3.16											33300
0	9243	hcd	487.51	20006.3	126.128	19965.6	19965.6	0	1354.74	0	0	0	0	0	0	0	0	0	50.4		3.58									48906		33200
0	9244	hcd	324.21	20276.7	126.128	20102.7	20102.7	0	0	0	0	0	0	0	0	0	0	0	66.24											49502
0	9245	hcd	358.88	22971.3	126.128	22759.4	22759.4	0	516.98	0	0	0	0	0	0	0	0	0	67.25		1.51									49102		31400
0	9246	hcd	570.27	9975.5	537.274	3678.83	3678.83	0	849.04	0	0	0	0	0	0	0	0	0	8.46		2.05									49104		34400
0	9248	hcd	565.95	21729.5	126.128	21602.1	21602.1	0	718.61	0	0	0	0	0	0	0	0	0	51.22		1.79									49006		32900
0	9251	hcd	331.54	44927.2	126.128	44435.6	44435.6	0	964.49	0	0	0	0	0	0	0	0	0	137.63		3.06									50102		34300
0	9252	hcd	612.01	5751	355.07	2169.06	2169.06	0	0	0	0	0	0	0	0	0	0	0	5.27											35300
0	9253	hcd	659.78	19369.7	610.788	14782	14782	0	0	0	0	0	0	0	0	0	0	0	31.92											49102
0	9254	hcd	538.16	12828.9	299.062	8367.87	8367.87	0	0	0	0	0	0	0	0	0	0	0	20.24											48002
0	9258	hcd	348.15	5920.18	126.128	5889.66	5889.66	0	0	0	0	0	0	0	0	0	0	0	18.94											47002
0	9259	hcd	480.5	11919.5	126.128	11910.8	11910.8	0	0	0	0	0	0	0	0	0	0	0	30.11											47902
0	9262	hcd	576.59	1868.45	126.128	1828.84	1828.84	0	0	0	0	0	0	0	0	0	0	0	4.38											34800
0	9268	hcd	622.2	1275.5	1000.41	1202.04	1202.04	0	0	0	0	0	0	0	0	0	0	0	2.61											34100
0	9272	hcd	618.26	3806.03	126.128	3706.37	3706.37	0	0	0	0	0	0	0	0	0	0	0	8.79											52600
0	9273	hcd	352.21	20540.5	126.128	20487.2	20487.2	0	804.19	0	0	0	0	0	0	0	0	0	59.53		2.36									49106		34600
0	9276	hcd	472.94	15534.2	399.455	12647.9	12647.9	0	1213.58	0	0	0	0	0	0	0	0	0	32.62		3.13									48706		32400
0	9277	hcd	403.21	12803.8	126.128	12666.4	12666.4	0	1065.88	0	0	0	0	0	0	0	0	0	36.96		3.24									48606		33000
0	9278	hcd	479.23	9184.23	126.128	9137.8	9137.8	0	0	0	0	0	0	0	0	0	0	0	23.76											48402
0	9279	hcd	632.95	5773.88	127.086	2114.19	2114.19	0	0	0	0	0	0	0	0	0	0	0	4.69											35900
0	9282	hcd	783.28	2741.48	388.473	0	0	0	0	0	0	0	0	0	0	0	0	0
0	9283	hcd	633.28	6448.6	600.643	4315.77	4315.77	0	0	0	0	0	0	0	0	0	0	0	9.35											44900
0	9284	hcd	456.21	8099.88	126.128	8066.24	8066.24	0	753.77	0	0	0	0	0	0	0	0	0	20.93		2									48306		31800
0	9287	hcd	406.46	59997.6	466.277	33437.3	33437.3	0	0	0	0	0	0	0	0	0	0	0	41.53											48602
0	9288	hcd	430.73	109813	126.128	109291	109291	0	4742.74	0	0	0	0	0	0	0	0	0	228.8		10.17									50206		47200
0	9289	hcd	428.21	22221.7	508.299	16746	16746	0	0	0	0	0	0	0	0	0	0	0	44.91											49102
0	9290	hcd	470.56	4239.75	126.128	4208.87	4208.87	0	0	0	0	0	0	0	0	0	0	0	11.48											45100
0	9291	hcd	706.77	4507.98	657.781	0	0	0	0	0	0	0	0	0	0	0	0	0
0	9294	hcd	572.27	9578.82	126.128	9517.73	9517.73	0	0	0	0	0	0	0	0	0	0	0	22.36											47502
0	9295	hcd	614.96	3246.12	126.128	3181.22	3181.22	0	0	0	0	0	0	0	0	0	0	0	7.5											46500
0	9296	hcd	348.92	8151.59	126.128	8130.88	8130.88	0	0	0	0	0	0	0	0	0	0	0	23.64											48002
0	9299	hcd	653.54	3891.11	126.128	3785.54	3785.54	0	0	0	0	0	0	0	0	0	0	0	8.36											53000
0	9300	hcd	580.95	10706.5	126.128	10706.1	10706.1	0	911.71	0	0	0	0	0	0	0	0	0	24.55		2.12									47406		34000
0	9301	hcd	562.28	9478.72	126.128	9351.66	9351.66	0	0	0	0	0	0	0	0	0	0	0	22.82											48302
0	9302	hcd	575.94	4887.19	126.128	4840.67	4840.67	0	0	0	0	0	0	0	0	0	0	0	11.02											45200
0	9306	hcd	450.47	12602.5	126.128	12491.7	12491.7	0	617.65	0	0	0	0	0	0	0	0	0	32.9		1.7									48206		34400
0	9309	hcd	314.86	91273.5	126.128	89794.9	89794.9	0	2231.25	0	0	0	0	0	0	0	0	0	177.7		4.55									50002		35400
0	9310	hcd	498.14	8325.75	126.128	8269.43	8269.43	0	0	0	0	0	0	0	0	0	0	0	21.68											48502
0	9311	hcd	471.72	27332.9	727.337	12525.6	12525.6	0	0	0	0	0	0	0	0	0	0	0	34.87											48802
0	9312	hcd	689.28	6276.43	622.773	0	0	0	0	0	0	0	0	0	0	0	0	0
0	9313	hcd	344.2	25222.3	126.128	25048.2	25048.2	0	930.69	0	0	0	0	0	0	0	0	0	72.77		2.78									49506		34500
0	9316	hcd	652.35	9066.71	582.347	3497.21	3497.21	0	0	0	0	0	0	0	0	0	0	0	7.76											49700
0	9317	hcd	752.36	2643.6	126.128	2594.29	2594.29	0	0	0	0	0	0	0	0	0	0	0	5.04											35700
0	9318	hcd	376.68	14797.2	126.128	14725.1	14725.1	0	440.46	0	0	0	0	0	0	0	0	0	43.98		1.33									49006		32300
0	9320	hcd	464.89	107135	126.128	104840	104840	0	2676.98	0	0	0	0	0	0	0	0	0	118.75		2.96									50102		34800
0	9321	hcd	395.19	51428	126.128	50977.7	50977.7	0	4446.93	0	0	0	0	0	0	0	0	0	118.34		10.78									49706		47000
0	9322	hcd	498.59	13895.4	126.128	13621.6	13621.6	0	0	0	0	0	0	0	0	0	0	0	34.67											48902
0	9323	hcd	376.93	13185.9	126.128	13063.3	13063.3	0	0	0	0	0	0	0	0	0	0	0	37.65											48802
0	9326	hcd	588.63	14187.9	126.128	14171.2	14171.2	0	0	0	0	0	0	0	0	0	0	0	32.44											48402
0	9327	hcd	457.22	21236	126.128	21067.6	21067.6	0	949.34	0	0	0	0	0	0	0	0	0	58.04		2.62									49406		33800
0	9328	hcd	794.85	6214.72	913.447	0	0	0	0	0	0	0	0	0	0	0	0	0
0	9331	hcd	402.96	11452.2	126.128	11338.4	11338.4	0	0	0	0	0	0	0	0	0	0	0	32.67											48502
0	9332	hcd	311.13	305243	239.095	26312	26312	0	1305.45	0	0	0	0	0	0	0	0	0	78.89		4.04									49506		35700
0	9333	hcd	584.26	4962.38	248.18	3722.19	3722.19	0	0	0	0	0	0	0	0	0	0	0	8.67											53000
0	9336	hcd	482.74	37256.2	328.686	28174.8	28174.8	0	1198.64	0	0	0	0	0	0	0	0	0	71.81		3.08									49506		33300
0	9337	hcd	501.91	96976.5	126.128	95855.8	95855.8	0	1613.22	0	0	0	0	0	0	0	0	0	97.72		1.69									50202		33800
0	9338	hcd	558.26	38787.7	445.261	16190.4	16190.4	0	0	0	0	0	0	0	0	0	0	0	41.04											49102
0	9339	hcd	545.2	12314.4	442.194	6894.27	6894.27	0	830	0	0	0	0	0	0	0	0	0	15.97		1.98									46006		35000
0	9342	hcd	462.53	161195	359.028	27208.5	27208.5	0	1430.73	0	0	0	0	0	0	0	0	0	49.28		2.63									49006		34700
0	9343	hcd	459.86	29215.1	136.076	9111.66	9111.66	0	0	0	0	0	0	0	0	0	0	0	23.11											47502
0	9344	hcd	726.81	2479.8	272.171	0	0	0	0	0	0	0	0	0	0	0	0	0
0	9346	hcd	409.55	8492.62	126.128	8453.93	8453.93	0	0	0	0	0	0	0	0	0	0	0	24.61											48202
0	9347	hcd	696.83	2407.06	126.128	2390.16	2390.16	0	0	0	0	0	0	0	0	0	0	0	5.08											36300
0	9350	hcd	485.23	142360	569.34	88766.7	88766.7	0	3652.01	0	0	0	0	0	0	0	0	0	51.8		2.2									49106		35000
0	9353	hcd	491.23	14448.4	442.24	6793.16	6793.16	0	0	0	0	0	0	0	0	0	0	0	17.8											47302
0	9354	hcd	482.73	38008	328.687	29564	29564	0	1099.43	0	0	0	0	0	0	0	0	0	75.83		2.94									49506		34400
0	9355	hcd	445.73	334833	359.028	238534	238534	0	3407.4	0	0	0	0	0	0	0	0	0	140.21		1.98									50102		33700
0	9358	hcd	435.57	287818	126.128	286416	286416	0	9598.33	0	0	0	0	0	0	0	0	0	91.74		3.04									49802		34300
0	9359	hcd	789.38	4260.53	691.401	1295.38	1295.38	0	0	0	0	0	0	0	0	0	0	0	2.46											34500
0	9361	hcd	418.56	93716.8	380.226	57786.8	57786.8	0	0	0	0	0	0	0	0	796.13	0	0	94.05									1.24		49702									32600
0	9362	hcd	420.57	36101.9	387.91	31631.7	31631.7	0	1229.96	0	0	0	0	0	0	0	0	0	86.84		3.41									49606		35100
0	9363	hcd	529.9	9756.7	687.355	9177.63	9177.63	0	0	0	0	0	0	0	0	0	0	0	23.52											48202
0	9364	hcd	596.62	29418.7	126.128	29418.5	29418.5	0	1778	0	0	0	0	0	0	0	0	0	69.19		4.35									49502		34600
0	9366	hcd	815.68	8661.16	717.701	7455.91	7455.91	0	0	0	0	0	0	0	0	0	0	0	14.09											46100
0	9367	hcd	765.86	7063.21	684.871	2071.2	2071.2	0	0	0	0	0	0	0	0	0	0	0	3.87											34500
0	9370	hcd	526.59	729628	447.263	321020	321020	0	0	0	0	0	0	0	0	0	0	0	62.24											49502
0	9371	hcd	715.77	2589.72	175.119	644.03	0	0	0	307.53	644.03	0	0	0	0	0	0	0					1.28											31800
0	9374	hcd	493.57	24115.9	126.128	23922.4	23922.4	0	0	0	0	0	0	0	0	0	0	0	61.1											49302
0	9375	hcd	338.22	110714	126.128	109906	109906	0	3203.01	0	0	0	0	0	0	0	0	0	312.79		9.6									50602		45200
0	9376	hcd	421.65	23834	126.128	23596.7	23596.7	0	1346.63	0	0	0	0	0	0	0	0	0	63.53		3.67									49806		33700
0	9377	hcd	413.16	13681.5	413.265	10323.7	10323.7	0	0	0	0	0	0	0	0	0	0	0	28.81											48302
0	9379	hcd	447.71	110106	304.685	50650.5	50650.5	0	1591.41	0	0	0	0	0	0	0	0	0	58.37		1.81									49402		33100
0	9380	hcd	632.97	6285.3	583.798	5384.98	5384.98	0	0	0	0	0	0	0	0	0	0	0	12.31											44900
0	9381	hcd	544.29	24797.8	126.128	24634.9	24634.9	0	1056.84	0	0	0	0	0	0	0	0	0	58.11		2.47									49606		34700
0	9382	hcd	515.96	12034.4	126.128	11994.3	11994.3	0	0	0	0	0	0	0	0	0	0	0	30.01											48602
0	9383	hcd	627.84	4615.55	557.336	4252.82	4252.82	0	0	0	0	0	0	0	0	0	0	0	9.33											47400
0	9386	hcd	533.19	33615.9	239.095	6311.62	6311.62	0	0	0	0	0	0	0	0	0	0	0	15.85											47002
0	9387	hcd	545.83	5332.81	442.194	2002.63	2002.63	0	0	0	0	0	0	0	0	0	0	0	5.22											36100
0	9388	hcd	441.48	56874.2	126.128	56335.5	56335.5	0	982.61	0	0	0	0	0	0	0	0	0	100.47		1.74									49902		36400
0	9389	hcd	399.71	9160.26	126.128	8982.42	8982.42	0	0	0	0	0	0	0	0	0	0	0	25.14											48002
0	9390	hcd	352.19	21863.8	126.128	21822.5	21822.5	0	1259.18	0	0	0	0	0	0	0	0	0	64.86		3.75									49106		33900
0	9392	hcd	635.58	2289.52	543.607	2203.63	2203.63	0	0	0	0	0	0	0	0	0	0	0	5.17											34700
0	9393	hcd	408.42	33234.3	149.023	21998.3	21998.3	0	957.3	0	0	0	0	0	0	0	0	0	64.04		2.89									49506		33200
0	9394	hcd	351.53	9932.22	126.128	9846.37	9846.37	0	656.25	0	0	0	0	0	0	0	0	0	29.24		1.93									48206		34400
0	9397	hcd	681.78	4707.53	225.043	0	0	0	0	0	0	0	0	0	0	0	0	0
0	9398	hcd	531.74	15930.5	412.75	13980.8	13980.8	0	633.64	0	0	0	0	0	0	0	0	0	34.3		1.64									48606		34500
0	9401	hcd	468.9	11097.3	126.128	11047.4	11047.4	0	558.63	0	0	0	0	0	0	0	0	0	30.54		1.55									48406		34700
0	9404	hcd	653.84	13795.9	653.844	9208.13	9208.13	0	0	0	0	0	0	0	0	0	0	0	20.43											47502
0	9405	hcd	615.96	3838.29	126.128	3665.56	3665.56	0	0	0	0	0	0	0	0	0	0	0	8.76											51800
0	9406	hcd	659.3	7888.13	126.128	7831.49	7831.49	0	0	0	0	0	0	0	0	0	0	0	17.31											47502
0	9407	hcd	320.55	34842.8	126.128	34687.5	34687.5	0	1227.05	0	0	0	0	0	0	0	0	0	105.37		3.88									49806		34700
0	9409	hcd	505.49	23533.2	418.995	13947.4	13947.4	0	801.17	0	0	0	0	0	0	0	0	0	35.53		2.08									48506		36000
0	9410	hcd	590.28	9127.49	126.128	9023.15	9023.15	0	566.12	0	0	0	0	0	0	0	0	0	21.19		1.34									47906		29800
0	9411	hcd	429.75	43166.2	126.128	43128.7	43128.7	0	535.79	0	0	0	0	0	0	0	0	0	117.87		1.53									49602		33500
0	9414	hcd	693.29	17234.7	546.323	11007.6	11007.6	0	0	0	0	0	0	0	0	0	0	0	22.73											47606
0	9415	hcd	619.59	5349.75	126.128	5349.69	5349.69	0	0	0	0	0	0	0	0	0	0	0	12.45											45700
0	9416	hcd	504.74	32862.9	126.128	32675.6	32675.6	0	3679.49	0	0	0	0	0	0	0	0	0	85		9.57									49606		50000
0	9417	hcd	553.25	7228.05	126.128	7225.04	7225.04	0	0	0	0	0	0	0	0	0	0	0	17.1											46502
0	9419	hcd	630.25	11446.9	538.273	6364.73	6364.73	0	0	0	0	0	0	0	0	0	0	0	15.16											46300
0	9420	hcd	558.85	19972.1	654.378	16317.3	16317.3	0	0	0	0	0	0	0	0	0	0	0	38.75											49002
0	9421	hcd	563.27	5079.78	126.128	5076.41	5076.41	0	0	0	0	0	0	0	0	0	0	0	11.81											44200
0	9424	hcd	477.04	59547.4	248.181	25184.6	25184.6	0	0	0	0	0	0	0	0	0	0	0	66.16											49402
0	9425	hcd	308.86	38748	308.9	11459.3	11459.3	0	0	0	0	0	0	0	0	0	0	0	35.5											49002
0	9426	hcd	494.72	19805.4	126.128	19645.5	19645.5	0	1239.41	0	0	0	0	0	0	0	0	0	52.19		3.34									49206		35200
0	9427	hcd	545.43	7509.1	442.195	5236.25	5236.25	0	0	0	0	0	0	0	0	0	0	0	12.56											45700
0	9430	hcd	511.77	115359	441.771	89966.3	89966.3	0	2742.88	0	0	0	0	0	0	0	0	0	129.85		4.05									49702		33300
0	9431	hcd	552.99	8516.49	504.003	7099.13	7099.13	0	0	0	0	0	0	0	0	0	0	0	17.85											46202
0	9432	hcd	385.19	55602	345.211	34253.2	34253.2	0	930.92	0	0	0	0	0	0	0	0	0	93.63		2.52									50102		34800
0	9433	hcd	697.44	1559.76	126.128	1518.85	1518.85	0	0	0	0	0	0	0	0	0	0	0	3.13											34300
0	9436	hcd	409.88	32377.9	126.128	32261.7	32261.7	0	1035.88	0	0	0	0	0	0	0	0	0	89.98		2.92									49602		34800
0	9437	hcd	538.75	11409.8	126.128	11393.7	11393.7	0	0	0	0	0	0	0	0	0	0	0	27.43											47702
0	9438	hcd	516.91	28869.2	126.128	28863.2	28863.2	0	612.88	0	0	0	0	0	0	0	0	0	67.78		1.45									49202		33200
0	9440	hcd	335.87	223287	126.128	221950	221950	0	9419.6	0	0	0	0	0	0	0	0	0	256.7		11.27									50506		45700
0	9441	hcd	402.54	10906	225.043	10137.9	10137.9	0	572.41	0	0	0	0	0	0	0	0	0	28.68		1.63									48102		35100
0	9444	hcd	435.23	170792	126.128	170792	170792	0	4588.53	0	0	0	0	0	0	0	0	0	83.37		2.34									49802		33900
0	9445	hcd	496.74	70549	126.128	70184.7	70184.7	0	1756.25	0	0	0	0	0	0	0	0	0	177.87		4.55									50202		34300
0	9446	hcd	504.26	31305.5	126.128	31019.3	31019.3	0	1925.35	0	0	0	0	0	0	0	0	0	79.16		5.09									49706		37100
0	9447	hcd	667.79	23358.4	569.817	10609	10609	0	0	0	0	0	0	0	0	0	0	0	23.44											47202
0	9448	hcd	602.62	5722.53	523.291	4558.82	4558.82	0	0	0	0	0	0	0	0	0	0	0	10.65											46000
0	9450	hcd	571.74	29232.5	490.748	1914.4	1914.4	0	0	0	0	0	0	0	0	0	0	0	4.64											35200
0	9451	hcd	478.89	34648.7	126.128	33991.9	33991.9	0	0	0	0	0	0	0	0	0	0	0	88.83											49602
0	9452	hcd	383.23	54726.4	126.128	54273.1	54273.1	0	1388.42	0	0	0	0	0	0	0	0	0	152.04		3.97									50302		36000
0	9453	hcd	507.55	7502.32	126.128	7496.79	7496.79	0	0	0	0	0	0	0	0	0	0	0	18.47											47202
0	9456	hcd	412.54	22623	126.128	22453.4	22453.4	0	536.09	0	0	0	0	0	0	0	0	0	62.89		1.5									49302		34300
0	9457	hcd	627.74	8204.08	578.348	3599.24	3599.24	0	0	0	0	0	0	0	0	0	0	0	7.71											49500
0	9458	hcd	374.1	153911	288.006	28914.2	28914.2	0	2246.16	0	0	0	0	0	0	0	0	0	48.84		3.95									48906		34200
0	9459	hcd	643.3	6449.7	126.127	6436.53	6436.53	0	0	0	0	0	0	0	0	0	0	0	13.81											45300
0	9461	hcd	646.64	23908.9	126.128	23782.8	23782.8	0	1074.18	0	0	0	0	0	0	0	0	0	50.95		2.31									49206		32400
0	9462	hcd	580.28	10724.9	126.128	10543.8	10543.8	0	0	0	0	0	0	0	0	0	0	0	25.89											48402
0	9463	hcd	398.97	12480.5	352.227	8133.43	8133.43	0	0	0	0	0	0	0	0	0	0	0	22.79											47902
0	9464	hcd	736.65	4389.14	671.672	1173.18	1173.18	0	0	0	0	0	0	0	0	0	0	0	2.46											36600
0	9465	hcd	656.79	6840.8	607.8	6679.02	6679.02	0	0	0	0	0	0	0	0	0	0	0	13.71											46402
0	9468	hcd	438.2	22936.1	126.128	22794.8	22794.8	0	1622.87	0	0	0	0	0	0	0	0	0	59.11		4.33									49506		35400
0	9469	hcd	415.19	13836.4	126.128	13830.8	13830.8	0	975.67	0	0	0	0	0	0	0	0	0	37.64		2.73									48306		33300
0	9471	hcd	470.22	22776.2	248.18	20612.1	20612.1	0	836.22	0	0	0	0	0	0	0	0	0	53.66		2.25									49006		31800
0	9472	hcd	380.72	29284.2	126.128	29275.2	29275.2	0	656.7	0	0	0	0	0	0	0	0	0	85.37		1.97									49302		32400
0	9473	hcd	718.34	7055.66	660.34	5649.09	5649.09	0	0	0	0	0	0	0	0	0	0	0	10.71											45900
0	9476	hcd	615.62	9858.31	126.128	9765.27	9765.27	0	0	0	0	0	0	0	0	0	0	0	21.44											46902
0	9480	hcd	359.42	94817.6	126.128	94116.2	94116.2	0	1702.18	0	0	0	0	0	0	0	0	0	157.6		2.9									50102		32600
0	9481	hcd	327.01	72057.6	174.992	19569.6	19569.6	0	883.9	0	0	0	0	0	0	0	0	0	61.4		2.8									49406		32400
0	9482	hcd	458.54	12604.7	126.128	12594.2	12594.2	0	1150.69	0	0	0	0	0	0	0	0	0	34		3.13									48406		32400
0	9485	hcd	475.26	25607.5	126.128	25459.2	25459.2	0	576.05	0	0	0	0	0	0	0	0	0	66.66		1.5									49402		36000
0	9486	hcd	655.31	24021.1	655.31	21550.8	21550.8	0	1184.42	0	0	0	0	0	0	0	0	0	44.66		2.58									48806		33200
0	9492	hcd	548.94	9568.33	126.128	9516.58	9516.58	0	0	0	0	0	0	0	0	0	0	0	22.97											47802
0	9493	hcd	687.31	11614.8	606.319	4422.22	4422.22	0	0	0	0	0	0	0	0	0	0	0	9.55											46400
0	9494	hcd	669.29	14280.4	748.346	1523.71	1523.71	0	0	0	0	0	0	0	0	0	0	0	3.46											34200
0	9495	hcd	555.9	7493.17	126.128	7411.48	7411.48	0	0	0	0	0	0	0	0	0	0	0	17.99											47002
0	9498	hcd	320.67	223488	126.128	222452	222452	0	6464.49	0	0	0	0	0	0	0	0	0	285.51		8.97									50202		53500
0	9499	hcd	589.91	17853.5	248.181	7392.78	7392.78	0	0	0	0	0	0	0	0	0	0	0	17.48											47102
0	9500	hcd	452.73	22673.1	126.128	22564	22564	0	785.23	0	0	0	0	0	0	0	0	0	57.19		2.08									49106		34100
0	9503	hcd	350.55	17442.3	126.128	17243.3	17243.3	0	0	0	0	0	0	0	0	0	0	0	54.03											49402
0	9504	hcd	603.82	28808.2	603.817	27246	27246	0	0	0	0	0	0	0	0	0	0	0	63.25											49902
0	9505	hcd	577.24	4103.59	714.336	3708	3708	0	0	0	0	0	0	0	0	0	0	0	8.65											48800
0	9508	hcd	572.51	7560.54	548.018	4567.01	4567.01	0	0	0	0	0	0	0	0	0	0	0	11.09											45200
0	9509	hcd	625.73	7831.98	544.742	2212.03	2212.03	0	0	0	0	0	0	0	0	0	0	0	5.1											35600
0	9510	hcd	535.93	38719.4	299.062	14677.3	14677.3	0	564.99	0	0	0	0	0	0	0	0	0	35.18		1.34									48706		35600
0	9513	hcd	345.21	17042.4	126.128	16898.6	16898.6	0	1189.42	0	0	0	0	0	0	0	0	0	54.04		3.9									49406		34800
0	9514	hcd	608.58	6632.72	239.095	3983.07	3983.07	0	0	0	0	0	0	0	0	0	0	0	9.08											50000
0	9515	hcd	473.97	55601.2	126.128	55312.8	55312.8	0	1232.86	0	0	0	0	0	0	0	0	0	134.87		3.12									50102		34300
0	9516	hcd	649.27	2422.29	126.128	2412.96	2412.96	0	0	0	0	0	0	0	0	0	0	0	5.04											34200
0	9519	hcd	510.24	66535.7	126.128	65666.9	65666.9	0	1536.62	0	0	0	0	0	0	0	0	0	160.78		3.81									50102		34000
0	9520	hcd	511.96	103424	462.782	33851.6	33851.6	0	1427.36	0	0	0	0	0	0	0	0	0	85.82		3.55									50006		35100
0	9521	hcd	631.95	9905.93	126.128	9905.46	9905.46	0	0	0	0	0	0	0	0	0	0	0	21.99											46802
0	9522	hcd	489.24	21188.5	126.128	21051.5	21051.5	0	0	0	0	0	0	0	0	0	0	0	53.21											49102
0	9524	hcd	541.61	24630.9	126.128	24485.7	24485.7	0	795.02	0	0	0	0	0	0	0	0	0	59.3		2									49606		33600
0	9525	hcd	585.6	7413.26	879.364	7017.44	7017.44	0	0	0	0	0	0	0	0	0	0	0	16.73											47302
0	9526	hcd	763.35	4360.49	725.012	1307.21	1307.21	0	0	0	0	0	0	0	0	0	0	0	2.63											35900
0	9528	hcd	362.22	93243.8	126.128	92494.1	92494.1	0	2038.08	0	0	0	0	0	0	0	0	0	192.87		4.27									50402		35900
0	9529	hcd	426.87	26157.6	126.128	25860.6	25860.6	0	1168.95	0	0	0	0	0	0	0	0	0	71.39		3.27									49606		33000
0	9530	hcd	385.72	40410.8	126.128	40364.3	40364.3	0	1387.37	0	0	0	0	0	0	0	0	0	109.24		3.83									49802		33800
0	9532	hcd	621.52	6278.87	126.128	6278.87	6278.87	0	0	0	0	0	0	0	0	0	0	0	14.14											46400
0	9533	hcd	454.88	12138	126.128	12025	12025	0	0	0	0	0	0	0	0	0	0	0	31.47											48202
0	9535	hcd	487.75	14747.3	126.128	14522.9	14522.9	0	602.76	0	0	0	0	0	0	0	0	0	36.93		1.51									48906		35400
0	9536	hcd	424.22	204403	424.218	65625.9	65625.9	0	2091.14	0	0	0	0	0	0	0	0	0	67.13		2.16									49602		36600
0	9539	hcd	566.29	20612.9	126.128	20436.9	20436.9	0	910.39	0	0	0	0	0	0	0	0	0	47.97		2.21									49302		33700
0	9540	hcd	608	9193.82	540.234	3549.93	3549.93	0	0	0	0	0	0	0	0	0	0	0	8.52											51600
0	9541	hcd	314.51	23028.4	170.12	17449.3	17449.3	0	806.97	0	0	0	0	0	0	0	0	0	56.04		2.65									48906		34600
0	9542	hcd	467.54	18189.7	126.128	18167.1	18167.1	0	996.6	0	0	0	0	0	0	0	0	0	47.29		2.71									49006		33900
0	9544	hcd	612.01	21790.8	543.03	8105.97	8105.97	0	0	0	0	0	0	0	0	0	0	0	18.61											47502
0	9545	hcd	331.54	76189.4	126.128	75374.3	75374.3	0	4692.61	0	0	0	0	0	0	0	0	0	229.49		14.52									50206		46100
0	9546	hcd	437.55	19338.2	126.128	19336.7	19336.7	0	1854.49	0	0	0	0	0	0	0	0	0	50.18		4.82									49206		35000
0	9549	hcd	341.2	541773	126.128	540069	540069	0	11676.9	0	0	0	0	0	0	0	0	0	224.86		5.01									50202		36900
0	9550	hcd	530.48	13814	248.18	12806.9	12806.9	0	751.97	0	0	0	0	0	0	0	0	0	30.76		1.82									48506		34500
0	9551	hcd	453.19	12589.8	126.128	12561.7	12561.7	0	1239.3	0	0	0	0	0	0	0	0	0	33.91		3.33									48206		34800
0	9552	hcd	691.66	2132.32	126.127	2125.96	2125.96	0	0	0	0	0	0	0	0	0	0	0	4.45											33100
0	9555	hcd	560.8	20261.8	126.128	20123.2	20123.2	0	1157.46	0	0	0	0	0	0	0	0	0	48.52		2.79									48706		34000
0	9556	hcd	455.91	18995.7	126.128	18902	18902	0	696.53	0	0	0	0	0	0	0	0	0	49.86		1.92									49006		31200
0	9559	hcd	499.39	10194	126.128	10127.9	10127.9	0	721.82	0	0	0	0	0	0	0	0	0	26.84		1.92									48106		33500
0	9560	hcd	386.87	53273.9	126.128	53025.8	53025.8	0	5106.02	0	0	0	0	0	0	0	0	0	121.07		11.78									50006		46400
0	9561	hcd	764.85	2382.02	715.86	0	0	0	0	0	0	0	0	0	0	0	0	0
0	9564	hcd	700.8	4377.88	126.127	4377.88	4377.88	0	0	0	0	0	0	0	0	0	0	0	9.21											49500
0	9565	hcd	761.07	2558.3	2849.38	1176.09	1176.09	0	0	0	0	0	0	0	0	0	0	0	2.32											36600
0	9567	hcd	636.94	2195.91	126.127	2192.41	2192.41	0	0	0	0	0	0	0	0	0	0	0	5.06											34000
0	9568	hcd	435.22	101145	126.128	99939.8	99939.8	0	2931.31	0	0	0	0	0	0	0	0	0	105.31		3.09									49702		34200
0	9569	hcd	810.84	6509.06	126.128	6411.2	6411.2	0	0	0	0	0	0	0	0	0	0	0	12.06											45800
0	9570	hcd	600.94	9482.24	126.128	9482.16	9482.16	0	0	0	0	0	0	0	0	0	0	0	20.41											48002
0	9573	hcd	338.2	126964	126.128	126928	126928	0	1676.47	0	0	0	0	0	0	0	0	0	274.93		3.77									50102		34100
0	9574	hcd	401.95	27075.5	296.679	12690.1	12690.1	0	0	0	0	0	0	0	0	0	0	0	34.55											48502
0	9575	hcd	548.26	7711.44	126.128	7695.75	7695.75	0	0	0	0	0	0	0	0	0	0	0	18.65											47502
0	9578	hcd	380.24	32758.8	126.128	32691.9	32691.9	0	959.38	0	0	0	0	0	0	0	0	0	94.47		2.92									49502		34200
0	9579	hcd	499.47	10939	126.128	10931.2	10931.2	0	0	0	0	0	0	0	0	0	0	0	27.88											47802
0	9581	hcd	433.54	18412.9	126.128	18395.7	18395.7	0	0	0	0	0	0	0	0	0	0	0	52.04											48902
0	9582	hcd	452.57	19672.2	126.128	19654	19654	0	940.21	0	0	0	0	0	0	0	0	0	52.07		2.49									49106		34400
0	9584	hcd	406.46	39330.7	466.277	29028	29028	0	772.19	0	0	0	0	0	0	0	0	0	69.43		1.83									49502		33900
0	9585	hcd	649.8	9875.52	600.812	7738.07	7738.07	0	0	0	0	0	0	0	0	0	0	0	17.4											47002
0	9586	hcd	465.2	15782.2	396.214	12366	12366	0	730.03	0	0	0	0	0	0	0	0	0	33.89		1.98									48502		34300
0	9587	hcd	660.51	6544.74	594.977	2271.12	2271.12	0	0	0	0	0	0	0	0	0	0	0	5.08											37000
0	9588	hcd	641.62	4171.34	543.351	2012.34	2012.34	0	0	0	0	0	0	0	0	0	0	0	4.24											34100
0	9591	hcd	428.21	21458.8	508.298	13704.9	13704.9	0	562.79	0	0	0	0	0	0	0	0	0	38.2		1.56									48706		37300
0	9592	hcd	569.25	8470.66	126.128	8366.71	8366.71	0	0	0	0	0	0	0	0	0	0	0	19.61											47202
0	9593	hcd	660.26	11708.9	594.312	5252.14	5252.14	0	0	0	0	0	0	0	0	0	0	0	11.91											45300
0	9594	hcd	430.89	15687.7	126.128	15672	15672	0	954.58	0	0	0	0	0	0	0	0	0	40.99		2.5									48606		33500
0	9597	hcd	455.72	258069	415.737	161596	161596	0	3327.77	0	0	0	0	0	0	0	0	0	266.29		5.52									50002		36700
0	9598	hcd	437.71	14817.2	126.128	14783.4	14783.4	0	722.78	0	0	0	0	0	0	0	0	0	41.79		2.11									48806		33100
0	9599	hcd	683.27	4587.52	683.366	1408.13	1408.13	0	0	0	0	0	0	0	0	0	0	0	3.17											35100
0	9602	hcd	609.26	6949.8	338.673	2079.15	2079.15	0	0	0	0	0	0	0	0	0	0	0	4.99											35800
0	9603	hcd	574.19	5441.31	126.128	5403.54	5403.54	0	593.18	0	0	0	0	0	0	0	0	0	12.93		1.41									45804		34700
0	9604	hcd	633.28	7592.89	126.128	7580.99	7580.99	0	0	0	0	0	0	0	0	0	0	0	16.14											46802
0	9606	hcd	314.86	19771.6	126.128	19726.4	19726.4	0	0	0	0	0	0	0	0	0	0	0	65.3											49202
0	9607	hcd	573.62	6548.85	126.128	6479.98	6479.98	0	882.65	0	0	0	0	0	0	0	0	0	15.57		2.08									47006		33000
0	9608	hcd	459.55	19534.5	225.043	14173.1	14173.1	0	691.2	0	0	0	0	0	0	0	0	0	38.7		1.98									48506		36200
0	9611	hcd	509.77	24835.6	126.128	24808.5	24808.5	0	0	0	0	0	0	0	0	0	0	0	64.67											49002
0	9612	hcd	498.23	29556.3	126.128	29300	29300	0	776.04	0	0	0	0	0	0	0	0	0	75.9		2.02									49602		32300
0	9613	hcd	642.79	23993.2	593.804	9654.63	9654.63	0	0	0	0	0	0	0	0	0	0	0	21.58											47502
0	9614	hcd	366.73	41876.6	126.128	41867.8	41867.8	0	1419.55	0	0	0	0	0	0	0	0	0	122.3		4.21									49902		34900
0	9615	hcd	880.35	1989.96	1568.39	0	0	0	0	0	0	0	0	0	0	0	0	0
0	9618	hcd	395.19	69789	394.726	59830.5	59830.5	0	5639.56	0	0	0	0	0	0	0	0	0	114.82		11.17									49506		46600
0	9619	hcd	470.36	5694.12	126.128	5657.07	5657.07	0	0	0	0	0	0	0	0	0	0	0	15.44											46602
0	9620	hcd	601.77	12503.4	126.128	12400.5	12400.5	0	1146.16	0	0	0	0	0	0	0	0	0	29.04		2.79									47906		33100
0	9621	hcd	777.93	2942.25	388.315	0	0	0	0	0	0	0	0	0	0	0	0	0
0	9622	hcd	539.26	9156.56	126.128	9148.68	9148.68	0	1181.61	0	0	0	0	0	0	0	0	0	21.58		2.81									48206		34300
0	9624	hcd	588.3	16802.2	126.128	16631.6	16631.6	0	0	0	0	0	0	0	0	0	0	0	38.05											49302
0	9625	hcd	584.75	9090.8	126.128	9027.58	9027.58	0	0	0	0	0	0	0	0	0	0	0	21.21											47502
0	9626	hcd	514.25	11533	126.128	11531	11531	0	899.25	0	0	0	0	0	0	0	0	0	28.77		2.24									48106		34000
0	9628	hcd	300.53	58085.8	300.062	42858.8	42858.8	724.14	9962.81	0	0	0	0	0	0	0	0	0	137.65	2.37	32.89									50006	47600	48402
0	9629	hcd	752.35	2682.75	126.128	2661.37	2661.37	0	0	0	0	0	0	0	0	0	0	0	5.44											36400
0	9630	hcd	359.87	59359.7	126.128	59149	59149	0	3061.42	0	0	0	0	0	0	0	0	0	169.73		9.33									50206		45700
0	9633	hcd	359.55	45820.7	126.128	45527.9	45527.9	0	1155.96	0	0	0	0	0	0	0	0	0	138.38		3.6									49802		34800
0	9634	hcd	778.93	2107.76	388.336	0	0	0	0	0	0	0	0	0	0	0	0	0
0	9635	hcd	712.27	3904.76	388.292	721.35	721.35	0	0	0	0	0	0	0	0	0	0	0	1.58											37300
0	9636	hcd	415.86	18067	126.128	18045.8	18045.8	0	0	0	0	0	0	0	0	0	0	0	48.08											49002
0	9638	hcd	501.91	48441.1	126.128	48086.3	48086.3	0	863.03	0	0	0	0	0	0	0	0	0	106.52		1.97									50102		33300
0	9639	hcd	467.74	35587.2	126.128	35190.6	35190.6	0	1862.12	0	0	0	0	0	0	0	0	0	91.24		4.95									49506		33900
0	9640	hcd	414.95	6578.27	126.128	6570.04	6570.04	0	0	0	0	0	0	0	0	0	0	0	17.91											46802
0	9642	hcd	505.56	18523	418.995	13002.4	13002.4	0	813.97	0	0	0	0	0	0	0	0	0	33.14		2.1									48306		36600
0	9643	hcd	599.24	8270.11	216.098	3838.18	3838.18	0	0	0	0	0	0	0	0	0	0	0	9.02											49000
0	9644	hcd	553.22	5727.51	504.23	4159.73	4159.73	0	647.85	0	0	0	0	0	0	0	0	0	10.01		1.57									44604		33800
0	9645	hcd	514.21	10346.5	126.128	10343.1	10343.1	0	700.97	0	0	0	0	0	0	0	0	0	25.88		1.8									48006		32500
0	9648	hcd	485.23	83640.8	569.34	44512	44512	0	0	0	0	0	0	0	0	0	0	0	54.35											49502
0	9649	hcd	722.61	2079.43	388.298	1964.96	1964.96	0	0	0	0	0	0	0	0	0	0	0	4.14											33300
0	9650	hcd	488.25	14112.5	126.128	14058.1	14058.1	0	0	0	0	0	0	0	0	0	0	0	33.7											48202
0	9653	hcd	552.59	3798.89	126.128	3751.3	3751.3	0	571.71	0	0	0	0	0	0	0	0	0	9.03		1.37									49404		33400
0	9656	hcd	428.86	21326.5	126.128	21301.6	21301.6	0	1590.5	0	0	0	0	0	0	0	0	0	58.85		4.62									49206		35600
0	9657	hcd	409.76	9168.05	126.128	9143.7	9143.7	0	751.11	0	0	0	0	0	0	0	0	0	24.72		2.1									48106		34000
0	9658	hcd	481.82	20791.7	126.128	20789.4	20789.4	0	919.65	0	0	0	0	0	0	0	0	0	52.68		2.34									49306		34400
0	9660	hcd	650.26	4427.44	600.812	3257.07	3257.07	0	0	0	0	0	0	0	0	0	0	0	7.24											44800
0	9661	hcd	757.79	5122.22	1013.43	867.03	867.03	0	0	0	0	0	0	0	0	0	0	0	1.77											34000
0	9662	hcd	482.99	23289.7	126.128	23121.9	23121.9	0	0	0	0	0	0	0	0	0	0	0	59.13											49302
0	9663	hcd	634.25	2986.16	388.311	1305.07	1305.07	0	0	0	0	0	0	0	0	0	0	0	3.08											33700
0	9664	hcd	609.21	3755.36	225.043	3571.64	3571.64	0	0	0	0	0	0	0	0	0	0	0	8.34											50600
0	9666	hcd	596.62	18542.5	126.128	18295.7	18295.7	0	0	0	0	0	0	0	0	0	0	0	42.17											48902
0	9667	hcd	468.25	54138	126.128	54081.6	54081.6	0	1835.03	0	0	0	0	0	0	0	0	0	134.94		4.72									49802		35200
0	9670	hcd	526.59	83765.5	447.263	44289.2	44289.2	0	1687.57	0	0	0	0	0	0	0	0	0	101.42		4.04									50006		33600
0	9671	hcd	551.74	7005.95	126.128	6957.35	6957.35	0	0	0	0	0	0	0	0	0	0	0	16.84											46602
0	9674	hcd	493.57	16513.8	126.128	16437.3	16437.3	0	981.53	0	0	0	0	0	0	0	0	0	43.21		2.69									49006		33400
0	9675	hcd	711.61	1611.19	388.342	1039.97	1039.97	0	0	0	0	0	0	0	0	0	0	0	2.36											33500
0	9676	hcd	880.01	4783.41	388.276	0	0	0	0	0	0	0	0	0	0	0	0	0
0	9677	hcd	350.84	18111.7	126.128	18102.5	18102.5	0	688.5	0	0	0	0	0	0	0	0	0	53.15		2.03									49406		30800
0	9679	hcd	548.6	5948.93	126.128	5846.38	5846.38	0	0	0	0	0	0	0	0	0	0	0	14.61											46500
0	9680	hcd	746.84	2120.03	697.852	0	0	0	0	0	0	0	0	0	0	0	0	0
0	9681	hcd	575.26	5123.85	126.128	5107.75	5107.75	0	0	0	0	0	0	0	0	0	0	0	11.62											45400
0	9683	hcd	515.96	8211.82	126.128	8033.35	8033.35	0	0	0	0	0	0	0	0	0	0	0	19.88											47802
0	9684	hcd	447.96	58265.5	304.685	32432.9	32432.9	0	2940.44	0	0	0	0	0	0	0	0	0	81.27		7.4									49706		46200
0	9685	hcd	491.4	9079.51	126.128	9033.8	9033.8	0	0	0	0	0	0	0	0	0	0	0	23.56											47702
0	9686	hcd	700.54	4743.96	248.18	1525.75	1525.75	0	0	0	0	0	0	0	0	0	0	0	3.12											35600
0	9688	hcd	441.48	36498.6	126.128	35989.2	35989.2	0	658.45	0	0	0	0	0	0	0	0	0	100.42		1.89									49502		35300
0	9689	hcd	398.89	31870.1	126.128	31406.6	31406.6	0	915.24	0	0	0	0	0	0	0	0	0	89.48		2.62									50202		34600
0	9690	hcd	331	21001.3	126.128	20992.2	20992.2	0	676.73	0	0	0	0	0	0	0	0	0	62.22		2.01									49402		37600
0	9694	hcd	695.8	1665.98	388.339	1060.41	1060.41	0	0	0	0	0	0	0	0	0	0	0	2.27											35200
0	9695	hcd	504.25	20746.9	126.128	20529.6	20529.6	0	1215.03	0	0	0	0	0	0	0	0	0	54.05		3.28									48706		33800
0	9696	hcd	316.8	24496.9	126.128	24370.3	24370.3	0	902.63	0	0	0	0	0	0	0	0	0	76.47		2.91									49806		32700
0	9697	hcd	603.93	5742.64	603.817	5047.3	5047.3	0	0	0	0	0	0	0	0	0	0	0	11.27											44400
0	9700	hcd	443.22	27186.3	126.128	27048.2	27048.2	0	612.81	0	0	0	0	0	0	0	0	0	71.9		1.64									49802		32600
0	9701	hcd	376.68	7328.22	126.128	7315.02	7315.02	0	0	0	0	0	0	0	0	0	0	0	21.6											47202
0	9702	hcd	451.21	9352.83	126.128	9328.84	9328.84	0	590.58	0	0	0	0	0	0	0	0	0	24.7		1.57									48106		34600
0	9705	hcd	413.7	33566.5	364.716	15068.7	15068.7	0	0	0	0	0	0	0	0	0	0	0	43.28											49202
0	9706	hcd	856.71	2671.79	824.047	1229.64	1229.64	0	0	0	0	0	0	0	0	0	0	0	2.21											32400
0	9709	hcd	643.79	20424.5	594.806	14234.2	14234.2	0	0	0	0	0	0	0	0	0	0	0	31.93											48002
0	9710	hcd	341.52	50315.6	126.128	50045.5	50045.5	0	3176.35	0	0	0	0	0	0	0	0	0	150.99		10.04									50106		45900
0	9713	hcd	619.59	26330.7	527.616	14927.9	14927.9	0	0	0	0	0	0	0	0	0	0	0	33.56											48602
0	9714	hcd	857.38	5130.77	818.38	2105.35	2105.35	0	0	0	0	0	0	0	0	0	0	0	3.84											36100
0	9716	hcd	630.25	7079.63	126.128	7006.9	7006.9	0	0	0	0	0	0	0	0	0	0	0	15.63											47502
0	9717	hcd	320.55	63580.8	126.128	63238.6	63238.6	0	1408.29	0	0	0	0	0	0	0	0	0	195.29		4.51									50202		36600
0	9720	hcd	472.58	45873	126.128	45488	45488	0	1088.67	0	0	0	0	0	0	0	0	0	121.99		2.91									50202		33700
0	9721	hcd	558.55	8597.81	126.128	8557.99	8557.99	0	0	0	0	0	0	0	0	0	0	0	20.33											46802
0	9722	hcd	348.18	8295.44	274.187	7605.41	7605.41	0	0	0	0	0	0	0	0	0	0	0	23.01											47302
0	9725	hcd	414.83	16757.4	126.128	16648.6	16648.6	0	776.77	0	0	0	0	0	0	0	0	0	47.37		2.3									49006		34600
0	9726	hcd	521.77	22008.2	274.187	13695.7	13695.7	0	0	0	0	0	0	0	0	0	0	0	35.11											48602
0	9727	hcd	482.25	101745	126.128	101097	101097	0	1985.53	0	0	0	0	0	0	0	0	0	150.38		2.96									50002		34900
0	9728	hcd	758.66	9849.32	720.331	9376.76	9376.76	0	0	0	0	0	0	0	0	0	0	0	17.94											46602
0	9730	hcd	654.92	4727.53	126.128	4659.18	4659.18	0	0	0	0	0	0	0	0	0	0	0	10.61											47400
0	9731	hcd	314.2	28711.1	126.128	28384.7	28384.7	0	1140.5	0	0	0	0	0	0	0	0	0	97.89		4.05									49606		33900
0	9732	hcd	384.71	40520	126.128	40480.1	40480.1	0	644.06	0	0	0	0	0	0	0	0	0	111.13		1.77									49702		31500
0	9735	hcd	835.62	2431.72	388.331	0	0	0	0	0	0	0	0	0	0	0	0	0
0	9736	hcd	364.18	33841.1	126.128	33802.3	33802.3	0	3826.98	0	0	0	0	0	0	0	0	0	97.56		11.22									49906		45300
0	9738	hcd	335.87	74501.5	126.128	74197.2	74197.2	0	3266.34	0	0	0	0	0	0	0	0	0	219.57		9.8									50106		46100
0	9741	hcd	435.23	77286.1	126.128	77174.9	77174.9	0	1704.44	0	0	0	0	0	0	0	0	0	91.13		2.04									49502		35200
0	9742	hcd	367.25	53721.7	126.128	53427.5	53427.5	0	2597.54	0	0	0	0	0	0	0	0	0	161.1		7.82									50106		47400
0	9743	hcd	477.04	40355.6	248.18	19971.1	19971.1	0	0	0	0	0	0	0	0	0	0	0	52.98											49402
0	9744	hcd	699.77	1426.57	126.127	1417.56	1417.56	0	0	0	0	0	0	0	0	0	0	0	2.94											34500
0	9747	hcd	478.89	22827.3	126.128	22694.4	22694.4	0	0	0	0	0	0	0	0	0	0	0	57.33											49502
0	9748	hcd	629.74	10835.2	126.128	10822.8	10822.8	0	0	0	0	0	0	0	0	0	0	0	24.8											47802
0	9749	hcd	464.2	43817.9	361.025	16582.7	16582.7	0	1123.44	0	0	0	0	0	0	0	0	0	42.65		3.01									48706		35100
0	9750	hcd	562.54	7230.85	126.128	7229.4	7229.4	0	0	0	0	0	0	0	0	0	0	0	16.47											46102
0	9752	hcd	507.55	11730.6	126.128	11724.1	11724.1	0	749.06	0	0	0	0	0	0	0	0	0	30.1		1.97									48206		33200
0	9753	hcd	411.87	14251.7	126.128	14200.7	14200.7	0	678.42	0	0	0	0	0	0	0	0	0	40.03		1.93									48806		34000
0	9754	hcd	579.23	6782.86	126.128	6768.92	6768.92	0	0	0	0	0	0	0	0	0	0	0	16.15											45802
0	9756	hcd	627.74	7781.2	248.181	5341.68	5341.68	0	0	0	0	0	0	0	0	0	0	0	12.34											45200
0	9757	hcd	651.79	7521.15	126.128	7408.14	7408.14	0	0	0	0	0	0	0	0	0	0	0	16.8											46602
0	9758	hcd	884.36	5745.9	126.128	5731.89	5731.89	0	0	0	0	0	0	0	0	0	0	0	10.41											48500
0	9760	hcd	646.98	17032	126.128	16956	16956	0	0	0	0	0	0	0	0	0	0	0	36.84											48402
0	9761	hcd	537.92	14929.1	505.256	13600.9	13600.9	0	0	0	0	0	0	0	0	0	0	0	33.06											48902
0	9762	hcd	432.89	24678.2	126.128	24641.7	24641.7	0	1864.98	0	0	0	0	0	0	0	0	0	63.2		4.95									49206		35200
0	9764	hcd	612.6	13591.4	579.939	8571.62	8571.62	0	985.63	0	0	0	0	0	0	0	0	0	20.38		2.34									47706		35000
0	9765	hcd	349.18	15805.1	433.297	12413.2	12413.2	0	0	0	0	0	0	0	0	0	0	0	38.91											48802
0	9766	hcd	403.69	16038.3	126.128	15878.8	15878.8	0	1301.64	0	0	0	0	0	0	0	0	0	45.28		3.8									48906		34400
0	9767	hcd	580.24	8320.87	126.128	8302.54	8302.54	0	0	0	0	0	0	0	0	0	0	0	19.73											47102
0	9768	hcd	675.81	11499.8	626.822	0	0	0	0	0	0	0	0	0	0	0	0	0
0	9771	hcd	641.79	14453.1	126.128	14342.3	14342.3	0	0	0	0	0	0	0	0	0	0	0	33.72											48502
0	9772	hcd	348.21	19856.1	126.128	19501	19501	0	0	0	0	0	0	0	0	0	0	0	61.29											49402
0	9773	hcd	607.21	21832.4	239.095	5391.32	5391.32	0	0	0	0	0	0	0	0	0	0	0	11.65											45000
0	9774	hcd	533.19	27238.9	239.095	6823.34	6823.34	0	570.3	0	0	0	0	0	0	0	0	0	16.09		1.36									46406		30100
0	9776	hcd	635.58	3737.13	126.128	3703.03	3703.03	0	0	0	0	0	0	0	0	0	0	0	8.34											50000
0	9777	hcd	585.24	21068.3	473.245	4348.6	4348.6	0	0	0	0	0	0	0	0	0	0	0	10.19											46000
0	9778	hcd	403.2	23392.9	126.128	23225.9	23225.9	0	779.81	0	0	0	0	0	0	0	0	0	67.8		2.29									49302		35700
0	9779	hcd	572.74	9912.95	523.756	6819.56	6819.56	0	0	0	0	0	0	0	0	0	0	0	16.58											47402
0	9780	hcd	378.89	26684.8	126.128	26678.7	26678.7	0	1171.02	0	0	0	0	0	0	0	0	0	74.32		3.39									49206		33500
0	9783	hcd	338.85	67629.3	126.128	67272.1	67272.1	0	3840.67	0	0	0	0	0	0	0	0	0	162.76		9.46									50206		46600
0	9784	hcd	466.91	14368.1	126.128	14238.6	14238.6	0	867.22	0	0	0	0	0	0	0	0	0	36.76		2.3									48706		32800
0	9785	hcd	602.23	9082.03	126.128	8988.42	8988.42	0	0	0	0	0	0	0	0	0	0	0	20.22											47802
0	9787	hcd	1027.75	6128.55	2854.46	0	0	0	0	0	0	0	0	0	0	0	0	0
0	9788	hcd	459.7	15890.6	225.043	15002.3	15002.3	0	634.46	0	0	0	0	0	0	0	0	0	39.32		1.66									49006		35700
0	9789	hcd	580.62	9823.32	126.128	9817.3	9817.3	0	0	0	0	0	0	0	0	0	0	0	22.45											47402
0	9792	hcd	558.85	10338	509.734	7930.85	7930.85	0	0	0	0	0	0	0	0	0	0	0	19.39											46802
0	9793	hcd	604.57	5742.09	126.128	5668.65	5668.65	0	0	0	0	0	0	0	0	0	0	0	13.3											45700
0	9794	hcd	469.48	14199.3	126.128	14173.2	14173.2	0	940.98	0	0	0	0	0	0	0	0	0	37.32		2.55									48706		33800
0	9797	hcd	596.9	27357	126.128	27228.4	27228.4	0	1325.37	0	0	0	0	0	0	0	0	0	63.83		3.18									49206		32900
0	9800	hcd	589.58	1.0259e+06	717.325	643245	643245	0	21874.2	0	0	0	0	0	0	0	0	0	79.39		2.79									49806		33500
0	9801	hcd	494.74	25577.2	544.284	6948.93	6948.93	0	0	0	0	0	0	0	0	0	0	0	17.83											46702
0	9802	hcd	571.73	11169.6	510.242	2061.73	2061.73	0	0	0	0	0	0	0	0	0	0	0	4.78											36200
0	9803	hcd	551.56	11319.6	126.128	11310	11310	0	0	0	0	0	0	0	0	0	0	0	26.58											47202
0	9805	hcd	682.28	2330.23	239.095	1564.72	1564.72	0	0	0	0	0	0	0	0	0	0	0	3.6											33000
0	9806	hcd	614.88	5620.14	126.128	5609.32	5609.32	0	842.26	0	0	0	0	0	0	0	0	0	12.5		1.97									45504		34000
0	9809	hcd	411.2	22610	126.128	22506.2	22506.2	490.77	861.07	0	0	0	0	0	0	0	0	0	64.06	1.39	2.54									49306	33300	31600
0	9810	hcd	451.92	16406.2	126.128	16273.8	16273.8	0	0	0	0	0	0	0	0	0	0	0	43.59											48902
0	9811	hcd	473.19	34125.2	126.128	33888.6	33888.6	0	1647.05	0	0	0	0	0	0	0	0	0	87.98		4.42									49706		35500
0	9812	hcd	948.06	7557.69	138.055	0	0	0	0	0	0	0	0	0	0	0	0	0
0	9814	hcd	535.6	20419.5	296.679	16090.1	16090.1	0	682.33	0	0	0	0	0	0	0	0	0	41.74		1.72									48802		35700
0	9815	hcd	462.15	196492	359.028	9831.01	9831.01	0	991.03	0	0	0	0	0	0	0	0	0	25.51		2.67									48306		32100
0	9816	hcd	574.57	3840.76	126.128	3838.87	3838.87	0	0	0	0	0	0	0	0	0	0	0	8.99											47600
0	9819	hcd	314.52	32874.2	126.128	32808	32808	0	1479.21	0	0	0	0	0	0	0	0	0	102.32		4.8									49606		35600
0	9820	hcd	514.24	20857.1	481.577	19232.4	19232.4	0	791.12	0	0	0	0	0	0	0	0	0	45.27		1.89									48706		35400
0	9821	hcd	647.83	46147	577.827	36896	36896	0	0	0	0	0	0	0	0	0	0	0	77.11											49302
0	9823	hcd	512.21	14547.3	126.128	14471.8	14471.8	0	674.9	0	0	0	0	0	0	0	0	0	38.55		1.79									49302		33900
0	9824	hcd	496.6	24441	126.128	24362.7	24362.7	0	893.18	0	0	0	0	0	0	0	0	0	62.71		2.4									49306		32200
0	9825	hcd	399.19	62458.6	359.208	35996	35996	0	1321.83	0	0	0	0	0	0	0	0	0	99.22		3.69									49606		33800
0	9826	hcd	352.22	26029.8	126.128	26020.4	26020.4	0	642.4	0	714.58	0	0	0	0	0	0	0	75.98		1.87		2.09							49302		32700		34500
0	9828	hcd	541.61	19228.2	126.128	19165.3	19165.3	0	0	0	0	0	0	0	0	0	0	0	47.13											49402
0	9829	hcd	503.97	16599.1	317.68	15782.8	15782.8	0	634.75	0	0	0	0	0	0	0	0	0	40.01		1.63									48906		31400
0	9830	hcd	843.8	1811.09	701.298	0	0	0	0	0	0	0	0	0	0	0	0	0
0	9832	hcd	362.22	65253.7	126.128	64715.1	64715.1	0	2524.8	0	0	0	0	0	0	0	0	0	192.82		7.58									50206		46100
0	9833	hcd	694.8	9757.88	931.433	8569.07	8569.07	0	0	0	0	0	0	0	0	0	0	0	18.27											47102
0	9834	hcd	523.93	38505	523.324	31498.5	31498.5	0	885.33	0	0	0	0	0	0	0	0	0	77.33		2.22									49302		34400
0	9835	hcd	604.96	10546.5	126.128	10540.4	10540.4	0	0	0	0	0	0	0	0	0	0	0	24.68											48002
0	9836	hcd	581.76	5067.86	126.128	5051.23	5051.23	0	0	0	0	0	0	0	0	0	0	0	11.97											45900
0	9838	hcd	424.72	32859.1	126.128	32498.9	32498.9	0	1740.18	0	0	0	0	0	0	0	0	0	88.95		4.79									49702		35800
0	9839	hcd	416.23	22602.6	126.128	22574.6	22574.6	0	568.41	0	0	0	0	0	0	0	0	0	63.69		1.6									49202		37900
0	9840	hcd	479.89	18716.9	126.128	18555	18555	0	1360.03	0	0	0	0	0	0	0	0	0	46.45		3.41									48806		34000
0	9843	hcd	565.95	15359.6	126.128	15284.6	15284.6	0	609.27	0	0	0	0	0	0	0	0	0	36.72		1.46									48402		35200
0	9844	hcd	546.23	15118.7	225.098	6709.25	6709.25	0	0	0	0	0	0	0	0	0	0	0	15.64											46802
0	9846	hcd	770.85	22498.6	721.862	4298.16	4298.16	0	0	0	0	0	0	0	0	0	0	0	9.01											50504
0	9847	hcd	671.63	6931.93	126.128	6774.73	6774.73	0	0	0	0	0	0	0	0	0	0	0	15.34											46500
0	9848	hcd	422.21	15678.9	126.128	15675.6	15675.6	0	0	0	0	0	0	0	0	0	0	0	42.86											48402
0	9851	hcd	530.23	11090.9	126.128	11003.2	11003.2	0	726.46	0	0	0	0	0	0	0	0	0	26.38		1.73									47906		33200
0	9852	hcd	565.49	7592.28	126.128	7586.03	7586.03	0	596.81	0	0	0	0	0	0	0	0	0	18.38		1.45									46502		34700
0	9853	hcd	653.94	7392.89	272.171	5393.19	5393.19	0	0	0	0	0	0	0	0	0	0	0	11.18											44900
0	9856	hcd	562.61	26926.3	126.128	26718.5	26718.5	0	909.45	0	0	0	0	0	0	0	0	0	61.78		2.11									49306		34100
0	9857	hcd	469.23	11934.2	126.128	11923.8	11923.8	0	0	0	0	0	0	0	0	0	0	0	32.41											48002
0	9858	hcd	463.92	28006.8	126.128	27842.6	27842.6	0	1156.07	0	0	0	0	0	0	0	0	0	73.82		3.1									49506		32800
0	9859	hcd	626.76	5663.7	126.127	5631.72	5631.72	0	0	0	0	0	0	0	0	0	0	0	12.8											46000
0	9861	hcd	643.64	5828.17	126.128	5753.2	5753.2	0	0	0	0	0	0	0	0	0	0	0	13.17											46200
0	9862	hcd	709.66	4209.15	126.128	4179.79	4179.79	0	0	0	0	0	0	0	0	0	0	0	9.03											49000
0	9863	hcd	471.24	41654	126.128	41518.8	41518.8	0	1320.1	0	0	0	0	0	0	0	0	0	108.48		3.45									49602		33800
0	9864	hcd	497.91	17616.2	126.128	17560.1	17560.1	0	1253.91	0	0	0	0	0	0	0	0	0	43.48		3.2									48606		33400
0	9866	hcd	358.07	6430.69	126.128	6414.72	6414.72	0	0	0	0	0	0	0	0	0	0	0	19.64											47802
0	9867	hcd	376.69	9565.43	126.128	9407.79	9407.79	0	499.75	0	0	0	0	0	0	0	0	0	28.08		1.53									48406		32700
[truncated: 41,165 more rows]

## Sheet: Table_S3
Dataset	ScanNumber	Identified	Collision Mode	ParentIonMZ	BasePeakIntensity	BasePeakMZ	ReporterIonIntensityMax	Ion_126.128	Ion_127.125	Ion_127.131	Ion_128.128	Ion_128.134	Ion_129.131	Ion_129.138	Ion_130.135	Ion_130.141	Ion_131.138	Ion_131.144	Weighted Avg Pct Intensity Correction	Ion_126.128_SignalToNoise	Ion_127.125_SignalToNoise	Ion_127.131_SignalToNoise	Ion_128.128_SignalToNoise	Ion_128.134_SignalToNoise	Ion_129.131_SignalToNoise	Ion_129.138_SignalToNoise	Ion_130.135_SignalToNoise	Ion_130.141_SignalToNoise	Ion_131.138_SignalToNoise	Ion_131.144_SignalToNoise	Ion_126.128_Resolution	Ion_127.125_Resolution	Ion_127.131_Resolution	Ion_128.128_Resolution	Ion_128.134_Resolution	Ion_129.131_Resolution	Ion_129.138_Resolution	Ion_130.135_Resolution	Ion_130.141_Resolution	Ion_131.138_Resolution	Ion_131.144_Resolution
0	4	0	hcd	336.89	9678.68	308.9	0	0	0	0	0	0	0	0	0	0	0	0	0
0	66	0	hcd	397.91	17919.6	374.896	0	0	0	0	0	0	0	0	0	0	0	0	0
0	128	0	hcd	405.3	16554.8	149.023	0	0	0	0	0	0	0	0	0	0	0	0	0
0	131	0	hcd	439.84	11013.2	439.844	0	0	0	0	0	0	0	0	0	0	0	0	0
0	135	0	hcd	684.2	35893.4	359.028	2194.62	1738.65	1321.82	1875.96	2194.62	1649.71	1570.03	1523.73	0	0	1743.77	0	0	3.72	2.85	4.12	4.66	3.5	3.33	3.39			3.87		35000	34100	34200	33900	32200	32500	32300			32500
0	136	0	hcd	607.21	25554.8	374.895	1678.56	1678.56	851.44	1130.04	0	0	0	0	0	0	620.59	0	0	3.57	1.82	2.41							1.35		35900	32900	32500							31900
0	137	0	hcd	476.7	1451.25	225.043	0	0	0	0	0	0	0	0	0	0	0	0	0
0	173	1	hcd	830.42	1.42197e+06	126.128	1.34119e+06	1.34119e+06	3944.17	115612	33732.1	34852.4	41425.2	31728.7	32023.7	32920.9	30560.7	29151.3	0	1795.18	5.05	147.48	43.22	45.81	51.34	39.34	39.58	40.54	39.5	37.82	50806	55500	50302	48100	48900	48404	48300	48400	48100	48300	48000
0	174	0	hcd	664.54	17055.4	126.128	17044.9	17044.9	0	875.16	893.63	1930.66	1146.27	2110.18	1561.35	1558.98	1047.82	1212.61	0	36.81		1.9	1.9	4.11	2.47	4.51	3.38	3.43	2.23	2.62	48806		32100	34100	33200	31800	33000	32700	30900	36400	31300
0	175	0	hcd	797.51	4498.42	473.33	2106.22	2106.22	0	0	0	0	0	0	0	0	0	0	0	4.3											35200
0	176	0	hcd	701.77	1292.63	1318.05	739	739	0	0	0	0	0	0	0	0	0	0	0	1.61											32100
0	177	0	hcd	598.39	1865.03	534.768	608.98	608.98	0	0	0	0	0	0	0	0	0	0	0	1.44											33800
0	178	0	hcd	749.43	1592.95	545.35	987.25	987.25	0	0	0	0	0	0	0	0	0	0	0	1.88											36700
0	180	0	hcd	880.24	2986.05	500.804	1101.93	1101.93	0	0	0	0	0	0	0	0	0	0	0	2.06											34500
0	181	0	hcd	921.85	2295.82	4568.43	0	0	0	0	0	0	0	0	0	0	0	0	0
0	186	0	hcd	308.9	218089	308.9	0	0	0	0	0	0	0	0	0	0	0	0	0
0	214	0	hcd	352.44	16585.9	352.239	0	0	0	0	0	0	0	0	0	0	0	0	0
0	246	0	hcd	334.83	112846	252.777	558.54	558.54	0	0	0	0	0	0	0	0	0	0	0	1.46											31000
0	258	0	hcd	335.22	88454.6	252.777	0	0	0	0	0	0	0	0	0	0	0	0	0
0	270	0	hcd	465.15	31930.4	362.027	0	0	0	0	0	0	0	0	0	0	0	0	0
0	271	0	hcd	624.24	16245.1	239.095	0	0	0	0	0	0	0	0	0	0	0	0	0
0	293	0	hcd	406.79	18469	389.766	0	0	0	0	0	0	0	0	0	0	0	0	0
0	305	0	hcd	397.91	74963.4	374.896	0	0	0	0	0	0	0	0	0	0	0	0	0
0	334	0	hcd	361.15	22620.1	223.064	0	0	0	0	0	0	0	0	0	0	0	0	0
0	364	0	hcd	404.79	18335.3	387.769	0	0	0	0	0	0	0	0	0	0	0	0	0
0	368	0	hcd	476.2	19765.3	239.095	0	0	0	0	0	0	0	0	0	0	0	0	0
0	384	0	hcd	394.85	16851.8	358.828	0	0	0	0	0	0	0	0	0	0	0	0	0
0	419	0	hcd	413.16	32758.9	358.828	0	0	0	0	0	0	0	0	0	0	0	0	0
0	426	0	hcd	684.2	29419.9	359.029	0	0	0	0	0	0	0	0	0	0	0	0	0
0	478	0	hcd	759.22	10236.7	299.062	0	0	0	0	0	0	0	0	0	0	0	0	0
0	481	0	hcd	479.21	13283.1	252.776	0	0	0	0	0	0	0	0	0	0	0	0	0
0	497	0	hcd	438.84	10705	439.233	0	0	0	0	0	0	0	0	0	0	0	0	0
0	522	0	hcd	464.81	54182.2	361.026	0	0	0	0	0	0	0	0	0	0	0	0	0
0	528	0	hcd	308.9	457829	250.778	0	0	0	0	0	0	0	0	0	0	0	0	0
0	532	0	hcd	607.21	35378.4	239.095	0	0	0	0	0	0	0	0	0	0	0	0	0
0	536	0	hcd	698.25	6488.89	239.095	0	0	0	0	0	0	0	0	0	0	0	0	0
0	537	0	hcd	397.91	34928	374.896	0	0	0	0	0	0	0	0	0	0	0	0	0
0	545	0	hcd	437.23	10642.5	437.233	0	0	0	0	0	0	0	0	0	0	0	0	0
0	576	0	hcd	624.24	16210.8	239.095	0	0	0	0	0	0	0	0	0	0	0	0	0
0	587	0	hcd	817.21	8494.79	299.062	0	0	0	0	0	0	0	0	0	0	0	0	0
0	595	0	hcd	405.3	19205.4	149.023	0	0	0	0	0	0	0	0	0	0	0	0	0
0	597	0	hcd	476.2	23181.9	250.778	0	0	0	0	0	0	0	0	0	0	0	0	0
0	613	0	hcd	340.9	51796.9	322.888	0	0	0	0	0	0	0	0	0	0	0	0	0
0	652	0	hcd	406.79	10918.9	389.767	0	0	0	0	0	0	0	0	0	0	0	0	0
0	663	0	hcd	413.16	35644.7	358.827	0	0	0	0	0	0	0	0	0	0	0	0	0
0	669	0	hcd	466.81	31247.7	431.768	0	0	0	0	0	0	0	0	0	0	0	0	0
0	676	0	hcd	669.18	19511.4	361.025	0	0	0	0	0	0	0	0	0	0	0	0	0
0	698	0	hcd	758.22	16300.6	299.062	0	0	0	0	0	0	0	0	0	0	0	0	0
0	707	0	hcd	681.23	13438	239.095	0	0	0	0	0	0	0	0	0	0	0	0	0
0	724	0	hcd	408.31	218503	149.023	0	0	0	0	0	0	0	0	0	0	0	0	0
0	725	0	hcd	759.22	7157.67	299.062	0	0	0	0	0	0	0	0	0	0	0	0	0
0	732	0	hcd	308.83	164593	250.778	0	0	0	0	0	0	0	0	0	0	0	0	0
0	733	0	hcd	440.84	10226.6	440.844	0	0	0	0	0	0	0	0	0	0	0	0	0
0	736	0	hcd	382.88	3277.18	382.829	0	0	0	0	0	0	0	0	0	0	0	0	0
0	739	0	hcd	377.27	14300.7	149.023	0	0	0	0	0	0	0	0	0	0	0	0	0
0	740	0	hcd	439.84	30252.6	439.844	0	0	0	0	0	0	0	0	0	0	0	0	0
0	747	0	hcd	550.22	20464.8	239.095	0	0	0	0	0	0	0	0	0	0	0	0	0
0	758	0	hcd	421.32	7940.09	386.859	0	0	0	0	0	0	0	0	0	0	0	0	0
0	771	0	hcd	397.91	15387.2	374.896	0	0	0	0	0	0	0	0	0	0	0	0	0
0	814	0	hcd	381.87	4013.58	303.898	0	0	0	0	0	0	0	0	0	0	0	0	0
0	819	0	hcd	684.2	26397.1	359.028	0	0	0	0	0	0	0	0	0	0	0	0	0
0	829	0	hcd	624.24	15472.8	239.095	0	0	0	0	0	0	0	0	0	0	0	0	0
0	834	0	hcd	321.21	59760.2	149.023	0	0	0	0	0	0	0	0	0	0	0	0	0
0	840	0	hcd	815.21	17691.2	299.062	0	0	0	0	0	0	0	0	0	0	0	0	0
0	860	0	hcd	817.21	4977.48	299.061	0	0	0	0	0	0	0	0	0	0	0	0	0
0	875	0	hcd	337.92	6039.17	338.284	0	0	0	0	0	0	0	0	0	0	0	0	0
0	878	0	hcd	405.85	12802.2	149.023	0	0	0	0	0	0	0	0	0	0	0	0	0
0	879	0	hcd	579.11	4787.7	167.055	0	0	0	0	0	0	0	0	0	0	0	0	0
0	928	0	hcd	335.22	46100.7	149.023	0	0	0	0	0	0	0	0	0	0	0	0	0
0	955	0	hcd	758.22	14490.2	299.062	0	0	0	0	0	0	0	0	0	0	0	0	0
0	985	0	hcd	439.84	19693.5	439.844	0	0	0	0	0	0	0	0	0	0	0	0	0
0	1012	0	hcd	322.89	3069.12	149.023	0	0	0	0	0	0	0	0	0	0	0	0	0
0	1018	0	hcd	550.22	20080.7	239.095	0	0	0	0	0	0	0	0	0	0	0	0	0
0	1030	0	hcd	421.32	8576.5	149.023	0	0	0	0	0	0	0	0	0	0	0	0	0
0	1034	0	hcd	377.27	12499.5	149.023	0	0	0	0	0	0	0	0	0	0	0	0	0
0	1051	0	hcd	381.87	3201.6	303.898	0	0	0	0	0	0	0	0	0	0	0	0	0
0	1056	0	hcd	476.2	17171.9	239.095	522.44	0	0	0	0	0	522.44	0	0	0	0	0	0						1.27											33900
0	1070	0	hcd	607.21	31114.1	239.095	0	0	0	0	0	0	0	0	0	0	0	0	0
0	1071	0	hcd	380.89	14756.3	303.898	0	0	0	0	0	0	0	0	0	0	0	0	0
0	1078	0	hcd	624.24	10931.8	239.095	0	0	0	0	0	0	0	0	0	0	0	0	0
0	1082	0	hcd	743.2	12011.2	299.062	0	0	0	0	0	0	0	0	0	0	0	0	0
0	1150	0	hcd	579.11	3907.98	167.056	0	0	0	0	0	0	0	0	0	0	0	0	0
0	1172	0	hcd	684.2	23638	359.028	0	0	0	0	0	0	0	0	0	0	0	0	0
0	1176	0	hcd	441.3	7259.97	440.844	0	0	0	0	0	0	0	0	0	0	0	0	0
0	1182	0	hcd	341.34	14638	323.871	0	0	0	0	0	0	0	0	0	0	0	0	0
0	1205	0	hcd	341.31	11683.8	322.887	0	0	0	0	0	0	0	0	0	0	0	0	0
0	1221	0	hcd	758.22	12649.5	299.062	0	0	0	0	0	0	0	0	0	0	0	0	0
0	1232	0	hcd	321.21	56741.4	149.023	0	0	0	0	0	0	0	0	0	0	0	0	0
0	1244	0	hcd	322.89	3575.99	149.023	0	0	0	0	0	0	0	0	0	0	0	0	0
0	1255	0	hcd	493.83	21496.2	457.805	0	0	0	0	0	0	0	0	0	0	0	0	0
0	1290	0	hcd	335.22	47926.7	149.023	0	0	0	0	0	0	0	0	0	0	0	0	0
0	1291	0	hcd	377.27	13909.8	149.024	0	0	0	0	0	0	0	0	0	0	0	0	0
0	1299	0	hcd	316.32	30722.1	257.247	0	0	0	0	0	0	0	0	0	0	0	0	0
0	1304	0	hcd	439.84	23186.3	439.844	0	0	0	0	0	0	0	0	0	0	0	0	0
0	1338	0	hcd	421.32	8994.48	149.023	0	0	0	0	0	0	0	0	0	0	0	0	0
0	1342	0	hcd	340.9	18070.4	323.872	0	0	0	0	0	0	0	0	0	0	0	0	0
0	1347	0	hcd	624.24	15402.6	239.095	0	0	0	0	0	0	0	0	0	0	0	0	0
0	1379	0	hcd	381.87	3056.07	303.898	0	0	0	0	0	0	0	0	0	0	0	0	0
0	1405	0	hcd	319.26	7494.01	300.918	0	0	0	0	0	0	0	0	0	0	0	0	0
0	1412	0	hcd	684.2	21267.9	359.029	0	0	0	0	0	0	0	0	0	0	0	0	0
0	1444	0	hcd	681.23	12017.7	239.094	0	0	0	0	0	0	0	0	0	0	0	0	0
0	1459	0	hcd	349.24	15477.3	149.023	0	0	0	0	0	0	0	0	0	0	0	0	0
0	1460	0	hcd	440.85	7023.9	440.844	0	0	0	0	0	0	0	0	0	0	0	0	0
0	1464	0	hcd	476.2	14187.9	239.095	0	0	0	0	0	0	0	0	0	0	0	0	0
0	1476	0	hcd	321.21	53287	149.023	0	0	0	0	0	0	0	0	0	0	0	0	0
0	1487	0	hcd	441.3	5134.44	405.844	0	0	0	0	0	0	0	0	0	0	0	0	0
0	1500	0	hcd	759.22	6981.6	299.062	0	0	0	0	0	0	0	0	0	0	0	0	0
0	1538	0	hcd	817.21	7184.88	299.062	0	0	0	0	0	0	0	0	0	0	0	0	0
0	1557	0	hcd	405.3	14173	149.023	0	0	0	0	0	0	0	0	0	0	0	0	0
0	1562	0	hcd	439.84	18097.5	439.844	0	0	0	0	0	0	0	0	0	0	0	0	0
0	1586	0	hcd	607.21	38856.8	239.095	0	0	0	0	0	0	0	0	0	0	0	0	0
0	1597	0	hcd	377.27	12396.7	149.023	0	0	0	0	0	0	0	0	0	0	0	0	0
0	1598	0	hcd	624.24	11948.5	239.095	0	0	0	0	0	0	0	0	0	0	0	0	0
0	1606	0	hcd	341.34	13161.5	323.872	0	0	0	0	0	0	0	0	0	0	0	0	0
0	1609	0	hcd	421.32	7156.14	149.023	0	0	0	0	0	0	0	0	0	0	0	0	0
0	1614	0	hcd	381.87	3467.17	303.897	0	0	0	0	0	0	0	0	0	0	0	0	0
0	1628	0	hcd	550.22	20064.6	239.095	0	0	0	0	0	0	0	0	0	0	0	0	0
0	1632	0	hcd	399.25	5327.94	366.863	0	0	0	0	0	0	0	0	0	0	0	0	0
0	1645	0	hcd	322.89	4056.14	149.023	0	0	0	0	0	0	0	0	0	0	0	0	0
0	1650	0	hcd	533.19	41861.1	239.095	0	0	0	0	0	0	0	0	0	0	0	0	0
0	1657	0	hcd	684.2	22797.9	359.028	0	0	0	0	0	0	0	0	0	0	0	0	0
0	1666	0	hcd	579.11	5170.32	167.055	0	0	0	0	0	0	0	0	0	0	0	0	0
0	1702	0	hcd	476.2	14423.8	225.043	0	0	0	0	0	0	0	0	0	0	0	0	0
0	1718	0	hcd	321.21	52088.9	149.023	0	0	0	0	0	0	0	0	0	0	0	0	0
0	1758	0	hcd	308.9	101581	308.9	0	0	0	0	0	0	0	0	0	0	0	0	0
0	1792	0	hcd	439.84	77065.4	439.844	586.96	0	0	0	0	0	0	0	0	0	0	586.96	0											1.53											34300
0	1808	0	hcd	743.19	12041.9	299.062	0	0	0	0	0	0	0	0	0	0	0	0	0
0	1813	0	hcd	681.23	12848.5	239.095	0	0	0	0	0	0	0	0	0	0	0	0	0
0	1822	0	hcd	335.22	52753.2	149.023	0	0	0	0	0	0	0	0	0	0	0	0	0
0	1830	0	hcd	669.18	19955.2	361.026	0	0	0	0	0	0	0	0	0	0	0	0	0
0	1838	0	hcd	758.22	10453.3	299.062	0	0	0	0	0	0	0	0	0	0	0	0	0
0	1839	0	hcd	505.09	38794	418.995	0	0	0	0	0	0	0	0	0	0	0	0	0
0	1861	0	hcd	341.34	7327.32	323.871	0	0	0	0	0	0	0	0	0	0	0	0	0
0	1877	0	hcd	495.83	61104.4	495.833	0	0	0	0	0	0	0	0	0	0	0	0	0
0	1880	0	hcd	421.32	7990.9	149.023	0	0	0	0	0	0	0	0	0	0	0	0	0
0	1888	0	hcd	550.22	17039.8	239.095	0	0	0	0	0	0	0	0	0	0	0	0	0
0	1906	0	hcd	607.21	34214.5	239.095	0	0	0	0	0	0	0	0	0	0	0	0	0
0	1907	0	hcd	684.2	25889.3	359.028	0	0	0	0	0	0	0	0	0	0	0	0	0
0	1908	0	hcd	624.24	13145.2	239.095	0	0	0	0	0	0	0	0	0	0	0	0	0
0	1932	0	hcd	685.2	10975.2	359.028	0	0	0	0	0	0	0	0	0	0	0	0	0
0	1958	0	hcd	405.3	17347.1	149.023	0	0	0	0	0	0	0	0	0	0	0	0	0
0	1994	0	hcd	408.31	163318	149.023	0	0	0	0	0	0	0	0	0	0	0	0	0
0	1998	0	hcd	344.03	46894.7	174.992	417.8	0	0	0	0	0	417.8	0	0	0	0	0	0						1.23											32300
0	2021	0	hcd	579.11	5294.12	167.055	0	0	0	0	0	0	0	0	0	0	0	0	0
0	2023	0	hcd	439.84	64800.9	439.843	0	0	0	0	0	0	0	0	0	0	0	0	0
0	2032	0	hcd	817.21	4689.99	285.01	0	0	0	0	0	0	0	0	0	0	0	0	0
0	2073	0	hcd	758.22	10521.9	299.062	0	0	0	0	0	0	0	0	0	0	0	0	0
0	2078	0	hcd	743.19	9851.65	299.061	0	0	0	0	0	0	0	0	0	0	0	0	0
0	2087	0	hcd	669.18	15814.3	361.026	0	0	0	0	0	0	0	0	0	0	0	0	0
0	2130	0	hcd	335.22	45954.3	149.023	0	0	0	0	0	0	0	0	0	0	0	0	0
0	2145	0	hcd	495.83	66245	495.833	0	0	0	0	0	0	0	0	0	0	0	0	0
0	2168	0	hcd	624.24	12797.1	239.095	0	0	0	0	0	0	0	0	0	0	0	0	0
0	2199	0	hcd	434.88	6545.23	210.95	0	0	0	0	0	0	0	0	0	0	0	0	0
0	2202	0	hcd	341.34	3270.02	229.008	0	0	0	0	0	0	0	0	0	0	0	0	0
0	2207	0	hcd	308.9	115029	308.9	0	0	0	0	0	0	0	0	0	0	0	0	0
0	2246	0	hcd	409.38	27135	149.023	0	0	0	0	0	0	0	0	0	0	0	0	0
0	2251	0	hcd	439.84	66931.8	439.843	0	0	0	0	0	0	0	0	0	0	0	0	0
0	2259	0	hcd	476.2	15968.5	225.043	0	0	0	0	0	0	0	0	0	0	0	0	0
0	2265	0	hcd	339.36	3726.35	339.288	0	0	0	0	0	0	0	0	0	0	0	0	0
0	2289	0	hcd	550.22	19506	239.095	0	0	0	0	0	0	0	0	0	0	0	0	0
0	2302	0	hcd	684.2	24222	359.028	0	0	0	0	0	0	0	0	0	0	0	0	0
0	2309	0	hcd	413.27	26489.1	413.266	0	0	0	0	0	0	0	0	0	0	0	0	0
0	2315	0	hcd	681.23	11377.2	225.043	0	0	0	0	0	0	0	0	0	0	0	0	0
0	2327	0	hcd	607.21	31399.1	239.095	0	0	0	0	0	0	0	0	0	0	0	0	0
0	2377	0	hcd	399.35	2910.04	366.865	0	0	0	0	0	0	0	0	0	0	0	0	0
0	2388	0	hcd	670.18	4839.06	360.029	0	0	0	0	0	0	0	0	0	0	0	0	0
0	2402	0	hcd	495.83	59479.7	495.833	0	0	0	0	0	0	0	0	0	0	0	0	0
0	2418	0	hcd	624.24	14309.2	239.095	0	0	0	0	0	0	0	0	0	0	0	0	0
0	2428	0	hcd	408.31	149771	149.023	0	0	0	0	0	0	0	0	0	0	0	0	0
0	2442	0	hcd	743.2	11361.3	299.061	0	0	0	0	0	0	0	0	0	0	0	0	0
0	2459	0	hcd	405.3	14861.3	149.023	0	0	0	0	0	0	0	0	0	0	0	0	0
0	2480	0	hcd	439.84	60714.4	439.843	0	0	0	0	0	0	0	0	0	0	0	0	0
0	2485	0	hcd	341.34	1466.09	229.008	0	0	0	0	0	0	0	0	0	0	0	0	0
0	2528	0	hcd	669.18	14564.7	361.025	0	0	0	0	0	0	0	0	0	0	0	0	0
0	2539	0	hcd	684.2	21604.4	359.028	0	0	0	0	0	0	0	0	0	0	0	0	0
0	2547	0	hcd	815.21	14272.3	355.07	0	0	0	0	0	0	0	0	0	0	0	0	0
0	2551	0	hcd	550.22	15602.8	239.095	0	0	0	0	0	0	0	0	0	0	0	0	0
0	2602	0	hcd	758.22	12812.5	299.062	0	0	0	0	0	0	0	0	0	0	0	0	0
0	2608	0	hcd	577.13	3709.05	355.069	0	0	0	0	0	0	0	0	0	0	0	0	0
0	2630	0	hcd	495.83	67030.1	495.833	0	0	0	0	0	0	0	0	0	0	0	0	0
0	2656	0	hcd	624.24	14400.7	239.095	0	0	0	0	0	0	0	0	0	0	0	0	0
0	2660	0	hcd	607.21	27593.6	239.095	0	0	0	0	0	0	0	0	0	0	0	0	0
0	2682	0	hcd	346.03	28610.5	174.992	0	0	0	0	0	0	0	0	0	0	0	0	0
0	2714	0	hcd	408.31	153594	149.023	0	0	0	0	0	0	0	0	0	0	0	0	0
0	2718	0	hcd	439.84	60112.1	439.844	0	0	0	0	0	0	0	0	0	0	0	0	0
0	2726	0	hcd	681.23	9742.36	225.043	0	0	0	0	0	0	0	0	0	0	0	0	0
0	2768	0	hcd	743.2	11911	299.062	0	0	0	0	0	0	0	0	0	0	0	0	0
0	2781	0	hcd	341.34	2982.49	229.009	0	0	0	0	0	0	0	0	0	0	0	0	0
0	2809	0	hcd	741.2	37101.9	299.062	0	0	0	0	0	0	0	0	0	0	0	0	0
0	2820	0	hcd	684.2	23715.5	359.028	0	0	0	0	0	0	0	0	0	0	0	0	0
0	2834	0	hcd	321.21	45888.2	149.023	0	0	0	0	0	0	0	0	0	0	0	0	0
0	2850	0	hcd	433.33	9332.77	149.023	0	0	0	0	0	0	0	0	0	0	0	0	0
0	2856	0	hcd	669.18	17231.9	361.025	0	0	0	0	0	0	0	0	0	0	0	0	0
0	2867	0	hcd	550.22	19372.8	239.095	0	0	0	0	0	0	0	0	0	0	0	0	0
0	2900	0	hcd	434.88	6405.91	210.95	0	0	0	0	0	0	0	0	0	0	0	0	0
0	2942	0	hcd	607.21	27495	239.095	0	0	0	0	0	0	0	0	0	0	0	0	0
0	2945	0	hcd	439.84	43592.9	439.843	0	0	0	0	0	0	0	0	0	0	0	0	0
0	2953	0	hcd	815.21	15578.4	299.062	0	0	0	0	0	0	0	0	0	0	0	0	0
0	2963	0	hcd	405.3	13685.4	149.023	0	0	0	0	0	0	0	0	0	0	0	0	0
0	2995	0	hcd	624.24	13594.8	239.095	0	0	0	0	0	0	0	0	0	0	0	0	0
0	3004	0	hcd	758.22	11403.5	299.062	0	0	0	0	0	0	0	0	0	0	0	0	0
0	3058	0	hcd	505.09	31766.5	418.995	0	0	0	0	0	0	0	0	0	0	0	0	0
0	3082	0	hcd	743.19	11687.7	299.061	0	0	0	0	0	0	0	0	0	0	0	0	0
0	3086	0	hcd	684.2	22860.4	359.028	0	0	0	0	0	0	0	0	0	0	0	0	0
0	3100	0	hcd	741.2	40171.3	299.062	0	0	0	0	0	0	0	0	0	0	0	0	0
0	3101	0	hcd	440.84	12599	440.844	0	0	0	0	0	0	0	0	0	0	0	0	0
0	3104	0	hcd	550.22	19070.2	239.095	0	0	0	0	0	0	0	0	0	0	0	0	0
0	3112	0	hcd	341.34	4292.01	229.009	0	0	0	0	0	0	0	0	0	0	0	0	0
0	3113	0	hcd	495.83	59668.9	495.833	0	0	0	0	0	0	0	0	0	0	0	0	0
0	3125	0	hcd	669.18	12834.5	359.028	0	0	0	0	0	0	0	0	0	0	0	0	0
0	3132	0	hcd	681.23	10984.1	225.043	0	0	0	0	0	0	0	0	0	0	0	0	0
0	3177	0	hcd	439.84	41799.8	439.843	0	0	0	0	0	0	0	0	0	0	0	0	0
0	3197	0	hcd	408.31	167376	149.023	0	0	0	0	0	0	0	0	0	0	0	0	0
0	3203	0	hcd	607.21	26942.1	239.095	0	0	0	0	0	0	0	0	0	0	0	0	0
0	3204	0	hcd	405.3	16450.9	149.023	0	0	0	0	0	0	0	0	0	0	0	0	0
0	3227	0	hcd	624.24	13163.7	239.095	0	0	0	0	0	0	0	0	0	0	0	0	0
0	3279	0	hcd	758.22	13630.8	299.062	0	0	0	0	0	0	0	0	0	0	0	0	0
0	3313	0	hcd	476.2	14589.2	239.095	0	0	0	0	0	0	0	0	0	0	0	0	0
0	3329	0	hcd	684.2	23159.4	359.028	0	0	0	0	0	0	0	0	0	0	0	0	0
0	3341	0	hcd	550.22	17088.2	239.095	0	0	0	0	0	0	0	0	0	0	0	0	0
0	3344	0	hcd	817.21	5477.61	299.062	0	0	0	0	0	0	0	0	0	0	0	0	0
0	3348	0	hcd	335.22	44269.9	149.023	0	0	0	0	0	0	0	0	0	0	0	0	0
0	3374	0	hcd	743.2	10063	299.061	0	0	0	0	0	0	0	0	0	0	0	0	0
0	3407	0	hcd	669.18	16522.8	361.025	0	0	0	0	0	0	0	0	0	0	0	0	0
0	3418	0	hcd	439.84	39685.5	439.843	0	0	0	0	0	0	0	0	0	0	0	0	0
0	3423	0	hcd	441.3	8146.93	440.844	0	0	0	0	0	0	0	0	0	0	0	0	0
0	3460	0	hcd	607.21	30938.2	239.095	0	0	0	0	0	0	0	0	0	0	0	0	0
0	3461	0	hcd	624.24	11559.7	225.043	0	0	0	0	0	0	0	0	0	0	0	0	0
0	3470	0	hcd	341.34	4437.98	229.008	0	0	0	0	0	0	0	0	0	0	0	0	0
0	3498	0	hcd	497.46	8753.89	496.834	0	0	0	0	0	0	0	0	0	0	0	0	0
0	3533	0	hcd	434.88	6416.39	210.951	0	0	0	0	0	0	0	0	0	0	0	0	0
0	3590	0	hcd	681.23	11081.6	225.043	0	0	0	0	0	0	0	0	0	0	0	0	0
0	3594	0	hcd	759.22	7937.37	299.06	0	0	0	0	0	0	0	0	0	0	0	0	0
0	3601	0	hcd	684.2	23554.3	359.029	0	0	0	0	0	0	0	0	0	0	0	0	0
0	3610	0	hcd	405.3	15303.4	149.023	0	0	0	0	0	0	0	0	0	0	0	0	0
0	3627	0	hcd	741.2	39041.4	299.062	0	0	0	0	0	0	0	0	0	0	0	0	0
0	3658	0	hcd	439.84	31043.2	439.844	0	0	0	0	0	0	0	0	0	0	0	0	0
0	3682	0	hcd	380.89	6063.61	303.897	0	0	0	0	0	0	0	0	0	0	0	0	0
0	3686	0	hcd	579.11	3691.6	167.055	0	0	0	0	0	0	0	0	0	0	0	0	0
0	3692	0	hcd	341.05	4277.04	322.888	0	0	0	0	0	0	0	0	0	0	0	0	0
0	3693	0	hcd	441.3	6967.3	440.843	0	0	0	0	0	0	0	0	0	0	0	0	0
0	3698	0	hcd	408.31	161604	149.023	0	0	0	0	0	0	0	0	0	0	0	0	0
0	3710	0	hcd	624.24	12694.5	239.095	0	0	0	0	0	0	0	0	0	0	0	0	0
0	3729	0	hcd	550.22	18619.9	239.095	0	0	0	0	0	0	0	0	0	0	0	0	0
0	3793	0	hcd	607.21	26534.9	239.095	0	0	0	0	0	0	0	0	0	0	0	0	0
0	3797	0	hcd	341.34	4879.91	322.887	0	0	0	0	0	0	0	0	0	0	0	0	0
0	3822	0	hcd	321.21	50720.3	149.023	0	0	0	0	0	0	0	0	0	0	0	0	0
0	3825	0	hcd	760.22	5892.51	299.062	0	0	0	0	0	0	0	0	0	0	0	0	0
0	3833	0	hcd	377.27	11751.8	149.023	0	0	0	0	0	0	0	0	0	0	0	0	0
0	3839	0	hcd	758.22	12317.6	299.062	0	0	0	0	0	0	0	0	0	0	0	0	0
0	3840	0	hcd	681.23	8584.12	225.043	0	0	0	0	0	0	0	0	0	0	0	0	0
0	3846	0	hcd	684.2	22359.7	359.028	0	0	0	0	0	0	0	0	0	0	0	0	0
0	3868	0	hcd	743.2	11977.7	299.062	0	0	0	0	0	0	0	0	0	0	0	0	0
0	3904	0	hcd	817.21	8045.27	299.062	0	0	0	0	0	0	0	0	0	0	0	0	0
0	3909	0	hcd	669.17	16649.9	359.028	0	0	0	0	0	0	0	0	0	0	0	0	0
0	3910	0	hcd	439.84	26504	439.844	461.64	461.64	0	0	0	0	0	0	0	0	0	0	0	1.25											33000
0	3952	0	hcd	405.3	15410.5	149.023	0	0	0	0	0	0	0	0	0	0	0	0	0
0	3967	0	hcd	816.22	8551.27	299.062	0	0	0	0	0	0	0	0	0	0	0	0	0
0	4028	0	hcd	624.24	12725.1	225.043	0	0	0	0	0	0	0	0	0	0	0	0	0
0	4062	0	hcd	441.3	7684.02	441.296	0	0	0	0	0	0	0	0	0	0	0	0	0
0	4077	0	hcd	681.23	9638.36	239.095	0	0	0	0	0	0	0	0	0	0	0	0	0
0	4086	0	hcd	434.88	5978.22	210.95	0	0	0	0	0	0	0	0	0	0	0	0	0
0	4101	0	hcd	684.2	21866.7	359.028	0	0	0	0	0	0	0	0	0	0	0	0	0
0	4110	0	hcd	815.21	17354.2	299.061	0	0	0	0	0	0	0	0	0	0	0	0	0
0	4123	0	hcd	321.21	54363.5	149.023	0	0	0	0	0	0	0	0	0	0	0	0	0
0	4139	0	hcd	741.2	32724.3	299.062	0	0	0	0	0	0	0	0	0	0	0	0	0
0	4145	0	hcd	743.2	13164.9	299.061	0	0	0	0	0	0	0	0	0	0	0	0	0
0	4164	0	hcd	685.2	15350	359.028	0	0	0	0	0	0	0	0	0	0	0	0	0
0	4175	0	hcd	669.17	17411.8	361.026	0	0	0	0	0	0	0	0	0	0	0	0	0
0	4184	0	hcd	439.84	21446.4	439.844	0	0	0	0	0	0	0	0	0	0	0	0	0
0	4185	0	hcd	625.24	4202.18	239.095	0	0	0	0	0	0	0	0	0	0	0	0	0
0	4228	0	hcd	381.87	4307.84	303.897	0	0	0	0	0	0	0	0	0	0	0	0	0
0	4232	0	hcd	817.22	6775.14	285.01	0	0	0	0	0	0	0	0	0	0	0	0	0
0	4235	0	hcd	377.27	12897.5	149.023	0	0	0	0	0	0	0	0	0	0	0	0	0
0	4236	0	hcd	579.11	3598.89	167.055	0	0	0	0	0	0	0	0	0	0	0	0	0
0	4256	0	hcd	758.22	10759.4	299.062	0	0	0	0	0	0	0	0	0	0	0	0	0
0	4285	0	hcd	550.22	18358.8	239.095	0	0	0	0	0	0	0	0	0	0	0	0	0
0	4294	0	hcd	624.24	14444.6	239.094	0	0	0	0	0	0	0	0	0	0	0	0	0
0	4316	0	hcd	681.23	13232.3	225.043	0	0	0	0	0	0	0	0	0	0	0	0	0
0	4349	0	hcd	607.21	29943	239.095	0	0	0	0	0	0	0	0	0	0	0	0	0
0	4366	0	hcd	441.3	5148.15	223.169	0	0	0	0	0	0	0	0	0	0	0	0	0
0	4380	0	hcd	743.19	12238	299.061	0	0	0	0	0	0	0	0	0	0	0	0	0
0	4407	0	hcd	321.21	51973	149.023	0	0	0	0	0	0	0	0	0	0	0	0	0
0	4417	0	hcd	625.24	4532.75	239.095	0	0	0	0	0	0	0	0	0	0	0	0	0
0	4430	0	hcd	684.2	18796.5	359.028	0	0	0	0	0	0	0	0	0	0	0	0	0
0	4436	0	hcd	439.84	19370.1	439.843	0	0	0	0	0	0	0	0	0	0	0	0	0
0	4449	0	hcd	669.18	15859.9	359.027	0	0	0	0	0	0	0	0	0	0	0	0	0
0	4462	0	hcd	381.87	1485.48	303.898	0	0	0	0	0	0	0	0	0	0	0	0	0
0	4476	0	hcd	341.34	6509.82	323.872	0	0	0	0	0	0	0	0	0	0	0	0	0
0	4521	0	hcd	758.22	13397.4	299.061	0	0	0	0	0	0	0	0	0	0	0	0	0
0	4529	0	hcd	624.24	11706	239.095	0	0	0	0	0	0	0	0	0	0	0	0	0
0	4570	0	hcd	408.31	214263	149.023	0	0	0	0	0	0	0	0	0	0	0	0	0
0	4577	0	hcd	579.11	4754.16	167.055	0	0	0	0	0	0	0	0	0	0	0	0	0
0	4621	0	hcd	743.19	13326.7	299.061	0	0	0	0	0	0	0	0	0	0	0	0	0
0	4625	0	hcd	681.23	11799.6	239.094	0	0	0	0	0	0	0	0	0	0	0	0	0
0	4636	0	hcd	441.3	7896.66	441.296	0	0	0	0	0	0	0	0	0	0	0	0	0
0	4639	0	hcd	405.3	14413	149.023	0	0	0	0	0	0	0	0	0	0	0	0	0
0	4640	0	hcd	321.21	47151.4	149.023	0	0	0	0	0	0	0	0	0	0	0	0	0
0	4653	0	hcd	511.47	1314.39	1472.55	0	0	0	0	0	0	0	0	0	0	0	0	0
0	4677	0	hcd	815.21	20383.5	299.062	0	0	0	0	0	0	0	0	0	0	0	0	0
0	4681	0	hcd	685.2	14761.8	359.028	0	0	0	0	0	0	0	0	0	0	0	0	0
0	4695	0	hcd	889.23	5932.08	359.027	0	0	0	0	0	0	0	0	0	0	0	0	0
0	4706	0	hcd	439.84	22984.8	439.843	0	0	0	0	0	0	0	0	0	0	0	0	0
0	4707	0	hcd	442.25	4875.68	384.746	2973.15	0	0	0	0	0	0	0	0	0	0	2973.15	0											7.9											47400
0	4723	0	hcd	341.34	7321.7	323.871	0	0	0	0	0	0	0	0	0	0	0	0	0
0	4729	0	hcd	550.22	18197.2	239.095	0	0	0	0	0	0	0	0	0	0	0	0	0
0	4734	0	hcd	454.67	21169.7	363.199	0	0	0	0	0	0	0	0	0	0	0	0	0
0	4735	0	hcd	596.25	13867.6	131.144	13831.9	0	0	0	0	0	0	0	0	668.23	193.47	13831.9	0									1.53		31.47									33100		47602
0	4736	0	hcd	428.87	30659.4	390.539	21831.1	0	0	0	0	0	0	0	0	587.63	532.63	21831.1	0									1.56		57.5									31900		48402
0	4737	0	hcd	687.95	30252.7	131.144	29699.2	0	0	0	0	0	0	0	0	764.36	1437.12	29699.2	0									1.7	3.02	62.76									33400	65600	48802
0	4738	0	hcd	451.96	6025.35	210.95	3687.74	0	0	0	0	0	0	0	0	0	0	3687.74	0											9.81											45700
0	4739	0	hcd	642.81	1500.94	131.144	1500.94	0	0	0	0	0	0	0	0	0	0	1500.94	0											3.5											35600
0	4740	1	hcd	516.21	91474.4	131.144	90780.6	0	0	0	0	0	0	0	0	1614.41	2685.36	90780.6	0									3.69		198.58									32200		49202
0	4741	0	hcd	456.95	11092.1	364.533	9417.32	0	0	0	0	0	0	0	0	0	23.27	9417.32	0											24.88											47402
0	4742	0	hcd	661.01	1567.29	1334.37	595.07	0	0	0	0	0	0	0	0	0	0	595.07	0											1.3											33500
0	4743	0	hcd	482.23	3436.59	131.144	3436.59	0	0	0	0	0	0	0	0	0	0	3436.59	0											8.95											48200
0	4744	0	hcd	473.89	4291.03	473.335	1345.64	0	0	0	0	0	0	0	0	0	0	1345.64	0											3.75											32700
0	4745	0	hcd	476.2	12592.5	225.043	799.77	0	0	0	0	0	0	0	0	0	0	799.77	0											2.02											32100
0	4747	0	hcd	358.66	4036.82	359.029	0	0	0	0	0	0	0	0	0	0	0	0	0
0	4748	0	hcd	548.91	4077.63	467.726	1887.24	0	0	0	0	0	0	0	0	0	0	1887.24	0											4.53											34800
0	4749	0	hcd	495.97	17742.8	495.833	602.74	0	0	0	0	0	0	0	0	0	0	602.74	0											1.52											33000
0	4751	0	hcd	491.48	3454.2	266.959	1148.1	0	0	0	0	0	0	0	0	0	0	1148.1	0											2.9											34800
0	4752	0	hcd	345.69	27242.7	174.992	1296.57	0	0	0	0	0	0	0	0	0	0	1296.57	0											3.85											34600
0	4753	0	hcd	423.75	1069.42	1270.82	634.68	0	0	0	0	0	0	0	0	0	0	634.68	0											1.7											33800
0	4757	0	hcd	352.44	10511.2	352.238	0	0	0	0	0	0	0	0	0	0	0	0	0
0	4780	0	hcd	758.22	11779.9	299.062	0	0	0	0	0	0	0	0	0	0	0	0	0
0	4824	0	hcd	624.24	11087	239.095	0	0	0	0	0	0	0	0	0	0	0	0	0
0	4852	0	hcd	684.2	22688.6	359.029	0	0	0	0	0	0	0	0	0	0	0	0	0
0	4873	0	hcd	743.19	13230.5	299.062	0	0	0	0	0	0	0	0	0	0	0	0	0
0	4885	0	hcd	434.88	6360.35	210.95	0	0	0	0	0	0	0	0	0	0	0	0	0
0	4909	0	hcd	405.3	13842.5	149.023	0	0	0	0	0	0	0	0	0	0	0	0	0
0	4950	0	hcd	607.21	27941.7	239.095	0	0	0	0	0	0	0	0	0	0	0	0	0
0	4951	0	hcd	421.32	6528.9	149.023	0	0	0	0	0	0	0	0	0	0	0	0	0
0	4962	0	hcd	321.21	47613.4	149.023	0	0	0	0	0	0	0	0	0	0	0	0	0
0	4974	0	hcd	515.96	1922.01	131.144	1916.61	0	0	0	0	0	0	0	0	0	0	1916.61	0											4.43											34300
0	4982	0	hcd	516.21	2034.63	430.983	1572.49	0	0	0	0	0	0	0	0	0	0	1572.49	0											3.7											32000
0	5005	0	hcd	669.18	14502.9	361.025	0	0	0	0	0	0	0	0	0	0	0	0	0
0	5037	0	hcd	817.21	5600.27	299.062	0	0	0	0	0	0	0	0	0	0	0	0	0
0	5055	0	hcd	741.2	38052.2	299.061	0	0	0	0	0	0	0	0	0	0	0	0	0
0	5070	0	hcd	624.24	14576.6	239.095	0	0	0	0	0	0	0	0	0	0	0	0	0
0	5085	0	hcd	626.23	1771.96	239.095	0	0	0	0	0	0	0	0	0	0	0	0	0
0	5088	0	hcd	380.89	10121.6	303.898	0	0	0	0	0	0	0	0	0	0	0	0	0
0	5106	0	hcd	743.19	11979.2	299.061	0	0	0	0	0	0	0	0	0	0	0	0	0
0	5111	0	hcd	815.21	16436.1	299.061	0	0	0	0	0	0	0	0	0	0	0	0	0
0	5141	0	hcd	381.87	915.42	380.075	0	0	0	0	0	0	0	0	0	0	0	0	0
0	5145	0	hcd	685.21	16018	359.028	0	0	0	0	0	0	0	0	0	0	0	0	0
0	5176	0	hcd	681.23	10404.1	239.094	0	0	0	0	0	0	0	0	0	0	0	0	0
0	5180	0	hcd	476.2	13796.1	239.095	0	0	0	0	0	0	0	0	0	0	0	0	0
0	5189	0	hcd	511.47	1004.37	725.831	0	0	0	0	0	0	0	0	0	0	0	0	0
0	5194	0	hcd	439.84	19392.3	439.844	0	0	0	0	0	0	0	0	0	0	0	0	0
0	5195	0	hcd	758.22	12680.7	299.062	0	0	0	0	0	0	0	0	0	0	0	0	0
0	5216	0	hcd	341.34	4390.35	323.871	0	0	0	0	0	0	0	0	0	0	0	0	0
0	5234	0	hcd	607.21	30129.2	239.095	0	0	0	0	0	0	0	0	0	0	0	0	0
0	5235	0	hcd	339.36	5855.35	339.289	0	0	0	0	0	0	0	0	0	0	0	0	0
0	5238	0	hcd	377.27	12849.1	149.023	0	0	0	0	0	0	0	0	0	0	0	0	0
0	5258	0	hcd	515.96	1018.21	953.192	838.7	0	0	0	0	0	0	0	0	0	0	838.7	0											1.96											33000
0	5297	0	hcd	321.21	47855.3	149.023	0	0	0	0	0	0	0	0	0	0	0	0	0
0	5309	0	hcd	624.24	12788.3	239.095	0	0	0	0	0	0	0	0	0	0	0	0	0
0	5313	0	hcd	550.22	16664.7	239.095	0	0	0	0	0	0	0	0	0	0	0	0	0
0	5353	0	hcd	421.32	6490.16	149.023	0	0	0	0	0	0	0	0	0	0	0	0	0
0	5356	0	hcd	669.17	14793.8	361.026	0	0	0	0	0	0	0	0	0	0	0	0	0
0	5357	0	hcd	743.19	12487.1	299.061	0	0	0	0	0	0	0	0	0	0	0	0	0
0	5377	0	hcd	684.2	22808.2	359.028	0	0	0	0	0	0	0	0	0	0	0	0	0
0	5402	0	hcd	405.3	14654.4	149.023	0	0	0	0	0	0	0	0	0	0	0	0	0
0	5443	0	hcd	681.23	10630.4	225.042	0	0	0	0	0	0	0	0	0	0	0	0	0
0	5454	0	hcd	511.47	1102.81	830.886	0	0	0	0	0	0	0	0	0	0	0	0	0
0	5478	0	hcd	607.21	31771.7	239.095	0	0	0	0	0	0	0	0	0	0	0	0	0
0	5484	0	hcd	381.87	1419.53	303.898	0	0	0	0	0	0	0	0	0	0	0	0	0
0	5492	0	hcd	318.24	27558	318.24	11307	0	0	0	0	0	0	0	0	0	0	11307	0											32.94											46802
0	5521	0	hcd	439.84	22170.7	439.844	0	0	0	0	0	0	0	0	0	0	0	0	0
0	5526	0	hcd	341.34	5380.56	323.872	0	0	0	0	0	0	0	0	0	0	0	0	0
0	5558	0	hcd	624.24	11817.9	239.095	0	0	0	0	0	0	0	0	0	0	0	0	0
0	5571	0	hcd	321.21	48795.4	149.023	0	0	0	0	0	0	0	0	0	0	0	0	0
0	5575	0	hcd	759.22	11305.9	299.062	0	0	0	0	0	0	0	0	0	0	0	0	0
0	5582	0	hcd	453.34	4082.94	229.009	544.86	0	0	0	0	0	0	0	0	0	0	544.86	0											1.42											33100
0	5598	0	hcd	758.22	15714.8	299.062	0	0	0	0	0	0	0	0	0	0	0	0	0
0	5604	0	hcd	335.22	45062.8	149.023	0	0	0	0	0	0	0	0	0	0	0	0	0
0	5613	0	hcd	684.2	24176.6	359.028	0	0	0	0	0	0	0	0	0	0	0	0	0
0	5624	0	hcd	743.2	12761.2	299.061	0	0	0	0	0	0	0	0	0	0	0	0	0
0	5675	0	hcd	579.11	3850.85	167.055	0	0	0	0	0	0	0	0	0	0	0	0	0
0	5683	0	hcd	516.21	1148.77	1246.21	0	0	0	0	0	0	0	0	0	0	0	0	0
0	5690	0	hcd	681.23	12032.9	225.042	0	0	0	0	0	0	0	0	0	0	0	0	0
0	5703	0	hcd	434.88	4666.87	210.95	0	0	0	0	0	0	0	0	0	0	0	0	0
0	5726	0	hcd	625.24	4854.05	239.094	0	0	0	0	0	0	0	0	0	0	0	0	0
0	5735	0	hcd	476.2	13226	299.062	0	0	0	0	0	0	0	0	0	0	0	0	0
0	5757	0	hcd	399.25	3562.73	199.073	0	0	0	0	0	0	0	0	0	0	0	0	0
0	5768	0	hcd	741.2	36653.9	299.061	0	0	0	0	0	0	0	0	0	0	0	0	0
0	5781	0	hcd	402.18	47800.9	225.043	0	0	0	0	0	0	0	0	0	0	0	0	0
0	5790	0	hcd	405.3	16169.6	149.023	0	0	0	0	0	0	0	0	0	0	0	0	0
0	5791	0	hcd	452.74	1525.09	229.008	0	0	0	0	0	0	0	0	0	0	0	0	0
0	5794	0	hcd	624.24	15402.8	239.095	0	0	0	0	0	0	0	0	0	0	0	0	0
0	5811	0	hcd	453.14	3834.51	229.008	0	0	0	0	0	0	0	0	0	0	0	0	0
0	5814	0	hcd	760.22	5024.73	167.055	0	0	0	0	0	0	0	0	0	0	0	0	0
0	5830	0	hcd	321.21	54149.2	149.023	0	0	0	0	0	0	0	0	0	0	0	0	0
0	5841	0	hcd	503.39	4933.52	299.061	0	0	0	0	0	0	0	0	0	0	0	0	0
0	5844	0	hcd	381.88	1041.92	303.898	0	0	0	0	0	0	0	0	0	0	0	0	0
0	5845	0	hcd	439.84	16532	439.844	0	0	0	0	0	0	0	0	0	0	0	0	0
0	5857	0	hcd	566.18	1253.22	1998.93	0	0	0	0	0	0	0	0	0	0	0	0	0
0	5866	0	hcd	635.91	1533.76	543.606	1424.31	0	0	0	0	0	0	0	0	0	0	1424.31	0											3.03											33400
0	5870	0	hcd	561.33	2084.07	2822.82	0	0	0	0	0	0	0	0	0	0	0	0	0
0	5871	0	hcd	516.71	3566.02	131.144	3356.41	0	0	0	0	0	0	0	0	0	0	3356.41	0											8.62											48200
0	5876	0	hcd	684.2	22615.4	359.028	0	0	0	0	0	0	0	0	0	0	0	0	0
0	5884	0	hcd	402.92	17640.1	185.081	719.62	0	0	0	0	0	0	0	0	0	0	719.62	0											1.96											35900
0	5890	0	hcd	477.19	3976.93	391.957	1466.04	0	0	0	0	0	0	0	0	0	0	1466.04	0											3.84											34600
0	5891	0	hcd	758.22	12018.8	299.062	0	0	0	0	0	0	0	0	0	0	0	0	0
0	5894	0	hcd	434.34	8143.2	210.95	0	0	0	0	0	0	0	0	0	0	0	0	0
0	5900	0	hcd	495.97	17065.4	495.833	1026.3	0	0	0	0	0	0	0	0	0	0	1026.3	0											2.54											34600
0	5905	0	hcd	542.67	1585.18	542.121	1004.39	0	0	0	0	0	0	0	0	0	0	1004.39	0											2.38											35700
0	5906	0	hcd	561.13	1569.72	479.788	0	0	0	0	0	0	0	0	0	0	0	0	0
0	5907	0	hcd	379.52	2701.84	334.893	0	0	0	0	0	0	0	0	0	0	0	0	0
0	5910	0	hcd	566.43	1113.07	932.589	721.47	0	0	0	0	0	0	0	0	0	0	721.47	0											1.72											33200
0	5913	0	hcd	473.89	971.19	827.963	0	0	0	0	0	0	0	0	0	0	0	0	0
0	5918	0	hcd	562.13	4601.13	2847.41	0	0	0	0	0	0	0	0	0	0	0	0	0
0	5922	0	hcd	568.55	4882.61	2850.33	0	0	0	0	0	0	0	0	0	0	0	0	0
0	5923	0	hcd	507.9	15598.7	339.118	11503.4	0	0	0	0	0	0	0	0	0	295.04	11503.4	0											27.62											47602
0	5926	0	hcd	687.61	6472.16	574.308	4946.91	0	0	0	0	0	0	0	0	0	0	4946.91	0											10.44											46300
0	5927	0	hcd	396.98	5255.89	285.279	1251.66	0	0	0	0	0	0	0	0	0	0	1251.66	0											3.38											34600
0	5930	0	hcd	596.25	26018	131.145	26003.9	0	0	0	0	0	0	0	0	0	1294	26003.9	0										2.84	57.03										69700	48202
0	5931	0	hcd	530.22	10636.4	131.145	10632.5	0	0	0	0	0	0	0	0	0	663.39	10632.5	0										1.62	25.61										39200	47402
0	5932	0	hcd	505.46	27033.2	418.996	6842.5	0	0	0	0	0	0	0	0	0	311.32	6842.5	0											16.75											44702
0	5933	0	hcd	526.96	4790	131.144	4749.36	0	0	0	0	0	0	0	0	0	0	4749.36	0											11.05											44300
0	5935	0	hcd	497.94	4034.59	497.835	686.04	0	0	0	0	0	0	0	0	0	0	686.04	0											1.76											36400
0	5936	0	hcd	491.72	5157.79	131.144	5157.14	0	0	0	0	0	0	0	0	0	0	5157.14	0											13.19											46100
0	5937	0	hcd	528.73	19429.6	131.144	19394.2	0	0	0	0	0	0	0	0	0	178.06	19394.2	0											46.04											47402
0	5938	1	hcd	456.95	46022.7	391.958	27118	0	0	0	0	0	0	0	0	1264.01	353.93	27118	0									3.2		66.32									33400		48302
0	5939	0	hcd	423.76	9352.43	131.144	9295.58	0	0	0	0	0	0	0	0	0	0	9295.58	0											25.48											46602
0	5940	0	hcd	465.35	17714.8	362.025	4161.89	0	0	0	0	0	0	0	0	0	0	4161.89	0											10.93											45400
0	5942	0	hcd	489.71	5598.32	131.144	5534.82	0	0	0	0	0	0	0	0	0	0	5534.82	0											14.24											44400
0	5943	0	hcd	663.17	4163.7	2862.76	0	0	0	0	0	0	0	0	0	0	0	0	0
0	5944	0	hcd	412.97	65235.7	413.266	17413.4	0	0	0	0	0	0	0	0	0	211.22	17413.4	0											46.92											47706
0	5945	0	hcd	608.92	15215.9	528.278	10435.2	0	0	0	0	0	0	0	0	0	686.62	10435.2	0										1.55	23.38										33300	46502
0	5946	0	hcd	427.95	16654.9	203.128	4785.35	0	0	0	0	0	0	0	0	0	0	4785.35	0											12.4											45800
0	5947	0	hcd	407.71	101882	149.023	14466.3	0	0	0	0	0	0	0	0	519.68	580	14466.3	0									1.42	1.63	40.3									32700	53000	47702
0	5949	0	hcd	487.16	5645.27	361.219	1409.13	0	0	0	0	0	0	0	0	0	0	1409.13	0											3.53											33500
0	5950	0	hcd	508.23	15213.8	131.144	15072	0	0	0	0	0	0	0	0	0	315.34	15072	0											38.51											47702
0	5951	0	hcd	525.7	6701.78	131.144	6638.87	0	0	0	0	0	0	0	0	0	0	6638.87	0											16.48											46002
0	5952	0	hcd	529.19	19777.5	131.144	19693.4	0	0	0	0	477.66	0	0	0	0	270.68	19693.4	0					1.25						50.89					30300						47902
0	5953	0	hcd	538.16	32923.4	299.062	3429.07	0	0	0	0	0	0	0	0	0	0	3429.07	0											8.03											48400
0	5955	0	hcd	438.76	4864.01	327.206	3734.28	0	0	0	0	0	0	0	0	0	0	3734.28	0											10.06											44400
0	5956	0	hcd	705.25	1863.48	131.144	1835.75	0	0	0	0	0	0	0	0	0	0	1835.75	0											3.88											34000
0	5957	0	hcd	498.17	5413.27	131.144	5312.48	0	0	0	0	0	0	0	0	0	0	5312.48	0											13.49											45500
0	5958	0	hcd	474.55	5494.74	131.144	5491.39	0	0	0	0	0	0	0	0	0	307.5	5491.39	0											14.82											45400
0	5959	0	hcd	649.73	4463.47	131.144	4439.13	0	0	0	0	0	0	0	0	0	0	4439.13	0											9.37											44900
0	5962	0	hcd	481.97	5783.55	385.846	3879.56	0	0	0	0	0	0	0	0	0	0	3879.56	0											10.52											44300
0	5963	0	hcd	364.2	27079.7	315.209	8192.1	0	0	0	0	0	0	0	0	0	0	8192.1	0											24.43											46102
0	5964	0	hcd	530.66	7230.41	131.144	7157.32	0	0	0	0	0	0	0	0	0	0	7157.32	0											18.55											46202
0	5965	0	hcd	622.2	4175.63	131.144	4118.61	0	0	0	0	0	0	0	0	0	0	4118.61	0											9.03											44600
0	5967	0	hcd	582.5	6098.57	131.144	5965.74	0	0	0	0	0	0	0	0	0	0	5965.74	0											13.66											44500
0	5968	0	hcd	652.94	12900.5	131.144	12806.9	0	0	0	0	0	0	0	0	0	149.82	12806.9	0											26.66											47602
0	5969	0	hcd	442.81	19593.9	248.187	17302.5	0	0	0	0	0	0	0	0	846.57	223.26	17302.5	0									2.31		46.08									35200		48302
0	5970	0	hcd	492.22	10244	131.144	9846.15	0	0	0	0	0	0	0	0	0	489.81	9846.15	0											24.95											47302
0	5972	0	hcd	701.16	2445.6	2877.77	1143	0	0	0	0	0	0	0	0	0	0	1143	0											2.31											35500
0	5973	0	hcd	487.38	4450.55	131.144	4430.04	0	0	0	0	0	0	0	0	0	0	4430.04	0											11.3											44900
0	5974	0	hcd	522.96	22218.6	131.145	21885.5	0	0	0	0	0	0	0	0	562.44	893.85	21885.5	0									1.29		51									33600		48402
0	5978	0	hcd	483.03	7301.93	131.144	7287.68	0	0	0	0	0	0	0	0	0	0	7287.68	0											18.45											46602
0	5979	0	hcd	438.82	119599	131.145	119599	0	0	0	0	0	0	0	0	1945.03	3149.33	119599	0									3.99		235.56									31000		49202
0	5980	0	hcd	553.26	17174.9	131.144	17021.4	0	0	0	0	0	0	0	0	713.54	318.23	17021.4	0									1.75		41.84									33500		48002
0	5981	0	hcd	697.28	9571.17	131.144	9318.87	0	0	0	0	0	0	0	0	0	470.45	9318.87	0											18.78											47102
0	5984	0	hcd	566.48	8796	131.144	8687.42	0	0	0	0	0	0	0	0	0	604.19	8687.42	0										1.55	21.06										34400	47002
0	5985	0	hcd	548.03	49138.1	131.145	49138.1	0	0	0	0	0	0	0	0	2126.03	1399.4	49138.1	0									5.41		119.78									36500		48902
0	5986	0	hcd	597.76	8056.98	131.145	7900.63	0	0	0	0	0	0	0	0	0	362.12	7900.63	0											17.95											46202
0	5987	0	hcd	345.69	26684.4	174.992	5342.93	0	0	0	0	0	0	0	0	0	0	5342.93	0											16.48											45902
0	5988	0	hcd	673.94	3640.91	556.285	882.07	0	0	0	0	0	0	0	0	0	0	882.07	0											1.87											35600
0	5991	0	hcd	566.73	12141.5	131.145	12112.4	0	0	0	0	0	0	0	0	0	708.81	12112.4	0											28.05											46902
0	5992	0	hcd	603.28	7380.77	131.145	7376.46	0	0	0	0	0	0	0	0	0	0	7376.46	0											16.94											46402
0	5993	0	hcd	458.61	17023.2	248.187	11257.1	0	0	0	0	0	0	0	0	0	150.51	11257.1	0											28.49											46802
0	5994	0	hcd	465.55	17213.5	362.026	5216.27	0	0	0	0	0	0	0	0	0	0	5216.27	0											13.25											44600
0	5995	0	hcd	511.71	4833.05	248.187	3892.1	0	0	0	0	0	0	0	0	0	0	3892.1	0											9.68											43700
0	5998	1	hcd	393.78	62062.7	312.678	22961.6	0	0	0	0	0	0	0	0	0	475.95	22961.6	0											59.47											48302
0	5999	0	hcd	580.61	4482.55	131.144	4476.53	0	0	0	0	0	0	0	0	0	0	4476.53	0											10.29											43600
0	6000	0	hcd	655.96	7753.83	131.145	7753.83	0	0	0	0	0	0	0	0	0	333.68	7753.83	0											16.27											45402
0	6003	0	hcd	521.99	14116.3	301.059	12482.6	0	0	0	0	0	0	0	0	0	92.96	12482.6	0											30.32											47202
0	6004	0	hcd	494.23	28279.8	209.63	9010.75	0	0	0	0	0	0	0	0	0	520.84	9010.75	0											22.81											47202
0	6005	0	hcd	554.97	5943.23	461.498	5791.36	0	0	0	0	0	0	0	0	0	0	5791.36	0											13.3											44900
0	6008	0	hcd	474.74	16022.7	131.145	15992.4	0	0	0	0	0	0	0	0	0	189.97	15992.4	0											39.51											47502
0	6009	0	hcd	382.34	14930.8	131.145	14684.8	0	0	0	0	0	0	0	0	0	673.58	14684.8	0										1.89	41.32										56600	47902
0	6011	0	hcd	409.97	21674.6	248.187	13047	0	0	0	0	0	0	0	0	0	277.69	13047	0											35.11											47902
0	6012	0	hcd	558.74	4461.55	131.144	4371.11	0	0	0	0	0	0	0	0	0	0	4371.11	0											11.06											44700
0	6013	0	hcd	612.94	10471.5	357.068	6261.92	0	0	0	0	0	0	0	0	0	0	6261.92	0											14.08											45502
0	6015	0	hcd	632.65	5514.55	131.144	5497.08	0	0	0	0	0	0	0	0	0	0	5497.08	0											11.9											45600
0	6016	0	hcd	406.3	13635.8	131.145	13575.3	0	0	0	0	0	0	0	0	0	235.74	13575.3	0											38.34											47802
0	6017	0	hcd	623.52	7020.44	550.036	6587.53	0	0	0	0	0	0	0	0	0	326.13	6587.53	0											14.96											46000
0	6018	0	hcd	318.24	78709.8	318.24	33311.2	0	0	0	0	0	0	0	0	0	1088.88	33311.2	0											103.18											49002
0	6020	0	hcd	558.49	1466.5	456.252	1354.16	0	0	0	0	0	0	0	0	0	0	1354.16	0											3.2											33400
0	6021	0	hcd	482.37	4740.94	131.144	4737.24	0	0	0	0	0	0	0	0	0	0	4737.24	0											11.99											44700
0	6022	0	hcd	379.99	11350.1	131.145	11342.1	0	0	0	0	0	0	0	0	0	66.78	11342.1	0											31.69											47202
0	6023	0	hcd	604.98	6083.9	531.496	875.69	0	0	0	0	0	0	0	0	0	0	875.69	0											1.92											35600
0	6026	0	hcd	550.99	6240.33	131.144	6236.35	0	0	0	0	0	0	0	0	0	412.9	6236.35	0											14.37											45402
0	6027	0	hcd	399.25	6658.8	131.144	6562.6	0	0	0	0	0	0	0	0	0	339.26	6562.6	0											17.68											46302
0	6030	0	hcd	614.96	7957.5	131.144	7918.19	0	0	0	0	0	0	0	0	0	0	7918.19	0											17.39											46402
0	6031	0	hcd	682.28	4458.38	239.095	4127.5	0	0	0	0	0	0	0	0	0	0	4127.5	0											8.69											48400
0	6032	0	hcd	396.39	12268	357.596	10797	0	0	0	0	0	0	0	0	0	144.51	10797	0											31.99											47302
0	6033	0	hcd	357.3	44857	213.185	3654.34	0	0	0	0	0	0	0	0	0	0	3654.34	0											11.01											44500
0	6036	0	hcd	495.24	19209.2	131.145	19194.8	0	0	0	0	0	0	0	0	0	382.71	19194.8	0											48.32											47602
0	6037	0	hcd	573.51	8428.43	131.144	8345.32	0	0	0	0	0	0	0	0	0	0	8345.32	0											18.34											46802
0	6040	0	hcd	441.39	26529	374.2	20794.6	0	0	0	0	0	0	0	0	0	299.59	20794.6	0											54.02											48202
0	6041	0	hcd	695.65	4963.84	175.119	2538.61	0	0	0	0	0	0	0	0	0	0	2538.61	0											5.26											34000
0	6042	0	hcd	382.67	14665.4	131.145	14382	0	0	0	0	0	0	0	0	0	762.29	14382	0										2.11	39.59										54900	48102
0	6045	0	hcd	411.59	73619.5	248.187	37339.4	0	0	0	0	0	0	0	0	673.04	714.62	37339.4	0									1.85		102.52									35200		48902
0	6046	0	hcd	633.31	26499.3	131.145	26341.2	0	0	0	0	0	0	0	0	0	247.28	26341.2	0											56.37											48202
0	6047	0	hcd	452.46	19613.2	131.145	19462	0	0	0	0	0	0	0	0	475.35	366.03	19462	0									1.29		52.75									30800		48302
0	6048	0	hcd	576.01	3909.22	487.766	3246.43	0	0	0	0	0	0	0	0	0	0	3246.43	0											7.95											49700
0	6051	0	hcd	436.21	11766.5	131.145	11682.6	0	0	0	0	0	0	0	0	0	306.12	11682.6	0											32.23											47502
0	6052	0	hcd	454.76	7469.54	131.145	7408.42	0	0	0	0	0	0	0	0	0	0	7408.42	0											19.23											46202
0	6055	0	hcd	490.17	39834.6	131.145	39785.4	0	0	0	0	0	0	0	0	1063.21	668.31	39785.4	0									2.67		99.78									31900		49102
0	6056	0	hcd	469.02	10425.4	248.187	7622.73	0	0	0	0	0	0	0	0	0	0	7622.73	0											19.59											46402
0	6057	0	hcd	643.24	5227.39	131.144	5087.31	0	0	0	0	0	0	0	0	0	0	5087.31	0											10.71											44500
0	6060	0	hcd	486.43	8989.18	131.145	8938.76	0	0	0	0	0	0	0	0	0	519.4	8938.76	0											22.61											47002
0	6061	0	hcd	602.94	10969.5	131.145	10950.5	0	0	0	0	0	0	0	0	0	539.67	10950.5	0											24.75											47002
0	6062	0	hcd	619.58	5647.07	521.602	5336.87	0	0	0	0	0	0	0	0	0	0	5336.87	0											12.04											44300
0	6065	0	hcd	428.37	20419.2	208.953	15964.1	0	0	0	0	0	0	0	0	602.9	170.49	15964.1	0									1.66		42.94									33200		47702
0	6066	0	hcd	660.88	3878.67	131.145	3838.04	0	0	0	0	0	0	0	0	0	0	3838.04	0											8.62											49900
0	6067	0	hcd	654.92	7384.47	131.145	7349.11	0	0	0	0	0	0	0	0	0	0	7349.11	0											15.98											45502
0	6068	0	hcd	525.75	10084.1	131.145	9915.9	0	0	0	0	0	0	0	0	0	546.63	9915.9	0											23.57											47402
0	6071	0	hcd	648.56	5999.76	131.144	5959.81	0	0	0	0	0	0	0	0	0	0	5959.81	0											13.05											45100
0	6072	0	hcd	414.27	9486.37	131.145	9467.34	0	0	0	0	0	0	0	0	0	303.77	9467.34	0											25.89											47102
0	6073	0	hcd	429.45	30269.7	304.685	18648.3	0	0	0	0	0	0	0	0	0	919.68	18648.3	0										2.49	50.53										64200	48602
0	6074	0	hcd	590.28	4295.48	131.144	4295.48	0	0	0	0	0	0	0	0	0	0	4295.48	0											9.65											43600
0	6076	0	hcd	643.57	9579.38	131.145	9577.79	0	0	0	0	0	0	0	0	0	628.41	9577.79	0										1.41	21.32										36500	46702
0	6077	0	hcd	526.72	14975.8	131.145	14873.2	0	0	0	0	0	0	0	0	585.94	188.5	14873.2	0									1.46		37.32									32400		47802
0	6078	0	hcd	509.4	8742.47	131.145	8496.12	0	0	0	0	0	0	0	0	0	292.68	8496.12	0											21.34											46602
0	6081	0	hcd	653.22	28672.3	131.145	28418.8	0	0	0	0	0	0	0	0	698.55	710.04	28418.8	0									1.57		61.3									34400		48502
0	6082	0	hcd	395.58	35305.6	131.145	35031.7	0	0	0	0	0	0	0	0	916.79	0	35031.7	0									2.53		97.37									34900		48802
0	6083	0	hcd	493.98	19747	175.119	18320.3	0	0	0	0	0	0	0	0	0	1073.9	18320.3	0										2.56	44.4										60900	48602
0	6085	0	hcd	538.42	26913.4	299.062	4584.48	0	0	0	0	0	0	0	0	0	0	4584.48	0											10.82											43700
0	6086	0	hcd	507.47	22385.1	339.118	15564.1	0	0	0	0	0	0	0	0	0	55.35	15564.1	0											37.57											47202
0	6087	1	hcd	423.95	12283.7	331.514	11175.1	0	0	0	0	0	0	0	0	0	0	11175.1	0											29.34											47402
0	6090	0	hcd	360.96	93263	131.144	93173.4	0	0	0	0	0	0	0	0	4552.45	386.7	93173.4	0									12.51		244.99									45500		49002
0	6091	1	hcd	430.21	26738.2	347.206	12909.8	0	0	0	0	0	0	0	0	0	235.45	12909.8	0											34.11											47202
0	6092	0	hcd	573.75	37463.9	131.144	37068.6	0	0	0	0	0	0	0	0	0	1114.51	37068.6	0											84.86											49002
0	6093	0	hcd	483.43	15582.4	131.144	15315.5	0	0	0	0	0	0	0	0	0	333	15315.5	0											38.08											48002
0	6096	0	hcd	442.96	46933.5	131.144	46649.6	0	0	0	0	0	0	0	0	1070.48	1802.59	46649.6	0									2.78	4.79	121.08									35400	74000	49002
0	6097	0	hcd	423.21	11139.4	175.119	6774.29	0	0	0	0	0	0	0	0	0	339.34	6774.29	0											19.07											46302
0	6098	0	hcd	480.95	54779.2	131.145	54536.9	0	0	0	0	0	0	0	0	1398.51	1369.74	54536.9	0									3.83		141.15									32000		49102
0	6099	0	hcd	619.62	7573.71	131.144	7467.55	0	0	0	0	0	0	0	0	0	0	7467.55	0											16.59											44802
0	6100	0	hcd	586.02	8225.94	131.144	8133.4	0	0	0	0	0	0	0	0	0	474.81	8133.4	0											17.66											46302
0	6103	0	hcd	492.47	15436.1	131.144	15326	0	0	0	0	0	0	0	0	0	211.9	15326	0											40.04											47802
0	6104	0	hcd	593.75	76682.4	355.07	0	0	0	0	0	0	0	0	0	0	0	0	0
0	6105	0	hcd	541.5	9896.87	131.144	9870.59	0	0	0	0	0	0	0	0	0	563.19	9870.59	0										1.33	23.42										38100	46302
0	6106	0	hcd	831.36	2261.04	131.144	2193.02	0	0	0	0	0	0	0	0	0	0	2193.02	0											3.95											33500
0	6109	0	hcd	756.06	5545.83	2878.6	753.74	0	0	0	0	0	0	0	0	0	0	753.74	0											1.52											34000
0	6110	0	hcd	569.26	7915.4	131.145	7785.32	0	0	0	0	0	0	0	0	0	0	7785.32	0											17.98											46702
0	6113	0	hcd	427.59	32591.8	203.128	18597.3	0	0	0	0	0	0	0	0	0	192.32	18597.3	0											50.88											47902
0	6114	0	hcd	479.97	11376.1	248.187	9206.55	0	0	0	0	0	0	0	0	626.06	235.89	9206.55	0									1.66		24.4									32000		47202
0	6116	0	hcd	474.02	23658.5	131.144	23442.8	0	0	0	0	0	0	0	0	0	497.93	23442.8	0											60.95											48502
0	6117	0	hcd	605.25	7311.11	523.264	1517.67	0	0	0	0	0	0	0	0	0	0	1517.67	0											3.42											33400
0	6118	0	hcd	407.81	89292.2	149.023	40303	0	0	0	0	0	0	0	0	1332.44	1635.86	40303	0									3.73		110.54									33000		49002
0	6121	0	hcd	503.39	22308.9	131.144	22081.4	0	0	0	0	0	0	0	0	0	403.65	22081.4	0											55.5											48206
0	6122	0	hcd	407.4	38266.3	131.145	37906.9	0	0	0	0	0	0	0	0	904.33	1301.72	37906.9	0									2.39	3.35	99.59									33400	71500	49102
0	6125	0	hcd	764	18194	131.144	18093.4	0	0	0	0	0	0	0	0	760.36	339.79	18093.4	0									1.55		36.72									35600		48102
0	6126	0	hcd	549.91	20841	131.144	20690.9	0	0	0	0	0	0	0	0	0	303.67	20690.9	0											47.86											48402
0	6127	0	hcd	524.73	14797.8	131.144	14697.8	0	0	0	0	0	0	0	0	0	743.84	14697.8	0										1.82	35.53										61600	47702
0	6128	0	hcd	676.97	4371.05	131.144	4158.88	0	0	0	0	0	0	0	0	0	0	4158.88	0											9.08											45200
0	6131	0	hcd	509.25	46211.8	131.145	46023.7	0	0	0	0	0	0	0	0	846.32	974.13	46023.7	0									2.17		113.12									32600		48802
0	6132	0	hcd	312.68	208920	240.095	107020	0	0	0	0	0	0	0	0	1698.28	3590.81	107020	0									1.9	3.87	115.28									35200	78000	49102
0	6133	0	hcd	416.58	32335.8	369.909	29029.2	0	0	0	0	0	0	0	0	1115.54	774.79	29029.2	0									3.12		79.8									34700		48602
0	6134	0	hcd	601.27	12247.1	131.144	12179.1	0	0	0	0	0	0	0	0	0	188.05	12179.1	0											28.65											48002
0	6135	0	hcd	464.72	42396	361.025	13672.8	0	0	0	0	0	0	0	0	0	1115.77	13672.8	0										2.89	34.68										57000	47902
0	6137	0	hcd	469.99	17834.6	131.145	17713.6	0	0	0	0	0	0	0	0	0	1055.99	17713.6	0										2.81	47.42										64100	47702
0	6138	0	hcd	467.21	20305.8	248.187	13676.9	0	0	0	0	0	0	0	0	0	196.3	13676.9	0											37.27											47706
0	6139	0	hcd	473.72	32303.2	131.145	32132.3	0	0	0	0	0	0	0	0	0	974.82	32132.3	0											83.79											48702
0	6140	0	hcd	421.71	21502.8	131.145	21502.8	0	0	0	0	0	0	0	0	907.99	790.23	21502.8	0									2.3		54.83									35600		48202
0	6142	0	hcd	449.41	20780.1	131.144	20637.8	0	0	0	0	0	0	0	0	535.66	490.85	20637.8	0									1.4		52.6									34100		48302
0	6143	0	hcd	378.95	7894.73	131.144	7868.29	0	0	0	0	0	0	0	0	0	0	7868.29	0											22.39											46802
0	6144	0	hcd	331	16991.7	176.989	1608.63	0	0	0	0	0	0	0	0	0	0	1608.63	0											4.77											35200
0	6145	0	hcd	470.41	13254.3	131.144	13088.3	0	0	0	0	0	0	0	0	0	199.46	13088.3	0											33.57											47502
0	6149	0	hcd	352.44	8561.94	352.238	2904.32	0	0	0	0	0	0	0	0	0	0	2904.32	0											8.6											45300
0	6152	0	hcd	443.47	54038.5	131.145	53996.4	0	0	0	0	0	0	0	0	924.61	1285.01	53996.4	0									2.46		140.23									35000		48702
0	6153	0	hcd	561.5	22816.8	131.144	22713.7	0	0	0	0	0	0	0	0	0	799.14	22713.7	0										2	53.5										65200	48402
0	6154	0	hcd	399.61	8050.41	248.187	7552.18	0	0	0	0	0	0	0	0	0	0	7552.18	0											20.75											46202
0	6156	1	hcd	635.58	184222	522.275	109259	0	0	0	0	0	0	0	0	2190.87	2180.69	109259	0									2.89		138.38									33300		48802
0	6157	0	hcd	764.67	24710.6	131.144	24477.3	0	0	0	0	0	0	0	0	600.53	437.65	24477.3	0									1.18		48.41									32600		47902
0	6158	0	hcd	524.98	13349.1	131.145	13213.8	0	0	0	0	0	0	0	0	0	297.95	13213.8	0											31.64											48002
0	6160	1	hcd	515.96	48277.6	131.144	48250.1	0	0	0	0	0	0	0	0	1362.51	505.68	48250.1	0									3.43		114.54									32300		48302
0	6161	0	hcd	590.96	20407.3	511.63	18808.9	0	0	0	0	0	0	0	0	0	999.23	18808.9	0										2.16	41.13										58600	47702
0	6164	0	hcd	678.67	8843.31	131.144	8755.44	0	0	0	0	0	0	0	0	0	0	8755.44	0											18.06											46202
0	6165	0	hcd	488.96	9329.45	131.144	9041.31	0	0	0	0	0	0	0	0	0	559.94	9041.31	0										1.46	23.11										29500	46802
0	6169	0	hcd	675.63	4729.2	577.981	0	0	0	0	0	0	0	0	0	0	0	0	0
0	6170	0	hcd	550.22	14849.5	239.095	4694.65	0	0	0	0	0	0	0	0	0	0	4694.65	0											10.89											43400
0	6174	1	hcd	350.69	25372.2	131.144	25192.2	0	0	0	0	0	0	0	0	0	471.48	25192.2	0											75.79											48602
0	6175	0	hcd	554.74	6069.9	131.145	5751.96	0	0	0	0	0	0	0	0	0	0	5751.96	0											13.8											45002
0	6177	0	hcd	402.92	19049.5	131.144	18837.3	0	0	0	0	0	0	0	0	0	314.54	18837.3	0											53.7											48202
0	6178	0	hcd	431.14	28990.2	208.953	7304.83	0	0	0	0	0	0	0	0	0	451.11	7304.83	0										1.25	19.67										24200	45702
0	6179	0	hcd	377	8907.12	149.023	3782.21	0	0	0	0	0	0	0	0	0	0	3782.21	0											10.25											42300
0	6182	0	hcd	476.94	148848	387.455	53064.8	0	0	0	0	0	0	0	0	993.64	1266.22	53064.8	0									1.69		85.78									34500		48902
0	6183	0	hcd	398	31320.4	282.69	20697.4	0	0	0	0	0	0	0	0	0	448.07	20697.4	0											57.62											48502
0	6184	0	hcd	466.92	37523.7	131.145	36901	0	0	0	0	0	0	0	0	0	1357.49	36901	0											92.03											48902
0	6187	0	hcd	497	23014	131.144	22919.2	0	0	0	0	0	0	0	0	0	327.08	22919.2	0											58.2											47902
0	6188	0	hcd	481.21	12319.5	321.688	10710.9	0	0	0	0	0	0	0	0	633.47	61.46	10710.9	0									1.63		27.63									35900		46702
0	6189	0	hcd	482.73	16055.8	131.144	15815.3	0	0	0	0	0	0	0	0	928.72	855.86	15815.3	0									2.49	2.18	40.92									32600	62600	47802
0	6191	0	hcd	554.42	6549.43	131.144	6435.03	0	0	0	0	0	0	0	0	0	0	6435.03	0											15.17											46102
0	6197	0	hcd	627.72	4911.73	131.144	4910.42	0	0	0	0	0	0	0	0	0	0	4910.42	0											11.06											44200
0	6198	0	hcd	801.69	1736.72	2024.78	878.65	0	0	0	0	0	0	0	0	0	0	878.65	0											1.55											35100
0	6201	0	hcd	461.47	148871	359.028	50797.2	0	0	0	0	0	0	0	0	1489.82	1020.97	50797.2	0									3.62		118.54									32600		48502
0	6202	0	hcd	486.49	25103.8	131.144	24998.7	0	0	0	0	0	0	0	0	735.93	540.58	24998.7	0									1.89		62.68									36000		48502
0	6203	0	hcd	610.95	54199.2	355.07	10669	0	0	0	0	0	0	0	0	0	715.79	10669	0										1.6	23.98										14500	46902
0	6204	0	hcd	802.02	2218.48	131.144	2213.04	0	0	0	0	0	0	0	0	0	0	2213.04	0											3.91											33600
0	6207	0	hcd	584.25	9990.24	131.145	9989.72	0	0	0	0	0	0	0	0	0	575.84	9989.72	0										1.39	23.96										37100	46902
0	6208	0	hcd	485.71	18869.2	248.187	13285.5	0	0	0	0	0	0	0	0	0	32.81	13285.5	0											34.53											47402
0	6209	0	hcd	543.26	13173.6	131.144	13001.9	0	0	0	0	0	0	0	0	0	895.03	13001.9	0										2.15	31.26										55200	47602
0	6210	0	hcd	564.51	15307.7	515.515	12903.2	0	0	0	0	0	0	0	0	0	318.18	12903.2	0											28.26											47202
0	6213	0	hcd	380.36	9816.14	131.145	9801.74	0	0	0	0	0	0	0	0	603.24	206.35	9801.74	0									1.78		28									28100		47402
0	6214	0	hcd	767.68	5998.69	131.144	5822.59	0	0	0	0	0	0	0	0	0	0	5822.59	0											10.94											45700
0	6216	0	hcd	699.64	10912.7	131.145	10885.5	0	0	0	0	0	0	0	0	0	657.93	10885.5	0										1.4	23.15										29300	47302
0	6217	0	hcd	501.46	33258.8	427.976	24360.1	0	0	0	0	0	0	0	0	657.2	1326.94	24360.1	0									1.64	3.16	57.95									31500	71400	48302
0	6218	0	hcd	767.34	6270.32	663.689	4784.05	0	0	0	0	0	0	0	0	0	0	4784.05	0											9.48											47100
0	6219	0	hcd	590.92	9347.95	131.145	9307.65	0	0	0	0	0	0	0	0	704.94	0	9307.65	0									1.55		20.51									34100		46806
0	6220	0	hcd	455.8	6850.52	131.144	6767.04	0	0	0	0	0	0	0	0	0	0	6767.04	0											17.73											46402
0	6223	0	hcd	474.7	26902.4	131.144	26783.1	0	0	0	0	0	0	0	0	0	421.91	26783.1	0											70.62											48402
0	6224	0	hcd	647.71	5485.26	131.144	5469	0	0	0	0	0	0	0	0	0	0	5469	0											12.05											44500
0	6225	0	hcd	529.99	26641.8	248.187	14026.8	0	0	0	0	0	0	0	0	0	220.39	14026.8	0											35.29											47602
0	6226	0	hcd	491.8	10175.3	131.145	10042.7	0	0	0	0	0	0	0	0	0	509.84	10042.7	0											24.79											46702
0	6228	0	hcd	558.65	2891.39	535.276	1506.3	0	0	0	0	0	0	0	0	0	0	1506.3	0											3.7											34600
0	6229	0	hcd	752.34	8962.69	687.019	5643.95	0	0	0	0	0	0	0	0	0	0	5643.95	0											11.06											44900
0	6230	0	hcd	339.84	16555.3	131.144	16324.7	0	0	0	0	0	0	0	0	0	410.62	16324.7	0											46.84											48202
0	6233	0	hcd	403.7	52299.6	131.145	52061.1	0	0	0	0	0	0	0	0	1922.7	1228.39	52061.1	0									5.39		139.7									35100		49202
0	6234	0	hcd	422.7	27540.5	131.145	27489.7	0	0	0	0	0	0	0	0	0	621.06	27489.7	0											78.03											48702
0	6235	0	hcd	469.89	21149.4	131.144	20765.2	0	0	0	0	0	0	0	0	0	852.99	20765.2	0										2	52.56										57800	48602
0	6238	0	hcd	687.61	8911.1	131.144	8780.4	0	0	0	0	0	0	0	0	0	0	8780.4	0											18.51											46202
0	6239	0	hcd	631.29	8474.39	175.119	8001.07	0	0	0	0	0	0	0	0	0	332.07	8001.07	0											18.07											45602
0	6240	0	hcd	504.47	15801.5	418.995	10208.4	0	0	0	0	0	0	0	0	0	536.57	10208.4	0											24.88											47702
0	6242	0	hcd	427.95	17407.7	203.128	10425.7	0	0	0	0	0	0	0	0	454.23	289.95	10425.7	0									1.25		28.81									32600		47202
0	6243	0	hcd	595.75	14408.3	357.067	3670.55	0	0	0	0	0	0	0	0	0	0	3670.55	0											8.21											47400
0	6246	0	hcd	505.09	34933.1	418.995	13703.4	0	0	0	0	0	0	0	0	0	153.81	13703.4	0											35.07											47502
0	6247	0	hcd	393.96	38806.6	131.145	38748.6	0	0	0	0	0	0	0	0	782.91	814.64	38748.6	0									2.19		108.32									34300		48902
0	6248	0	hcd	468.63	8976.8	131.144	8817.92	0	0	0	0	0	0	0	0	0	483.91	8817.92	0											21.94											46502
0	6252	0	hcd	619.96	8350.18	131.144	8346.89	0	0	0	0	0	0	0	0	0	0	8346.89	0											18.93											46202
0	6253	0	hcd	498.17	9217.03	131.144	9209.83	0	0	0	0	0	0	0	0	0	594.43	9209.83	0										1.55	23.2										37400	47002
0	6254	0	hcd	528.45	6725.15	434.978	6261.9	0	0	0	0	0	0	0	0	0	328.78	6261.9	0											14.45											45502
0	6257	0	hcd	341.65	3375.67	131.144	3363.29	0	0	0	0	0	0	0	0	0	0	3363.29	0											10.21											44700
0	6258	0	hcd	704.26	6690.52	131.144	6472.39	0	0	0	0	0	0	0	0	0	0	6472.39	0											13											46500
0	6261	0	hcd	643.28	5992.52	131.144	5958.69	0	0	0	0	0	0	0	0	0	0	5958.69	0											13.87											45800
0	6262	0	hcd	540.91	11355.5	131.145	11264.5	0	0	0	0	0	0	0	0	0	370.01	11264.5	0											27.6											47702
0	6263	0	hcd	652.61	8830.69	131.145	8757.55	0	0	0	0	0	0	0	0	0	0	8757.55	0											18.64											45202
0	6266	0	hcd	568.72	1353.29	590.093	1345.05	0	0	0	0	0	0	0	0	0	0	1345.05	0											3.15											33900
0	6267	0	hcd	584.5	6124.93	131.144	6122.21	0	0	0	0	0	0	0	0	0	0	6122.21	0											14.38											45100
0	6268	0	hcd	779.33	1763.38	714.007	0	0	0	0	0	0	0	0	0	0	0	0	0
0	6271	0	hcd	438.82	14665.3	131.144	14613.7	0	0	0	0	0	0	0	0	0	247.91	14613.7	0											39.64											47906
0	6272	0	hcd	439.81	21093	439.844	10845.6	0	0	0	0	0	0	0	0	0	283.07	10845.6	0											29.02											46802
0	6273	0	hcd	376.32	10821.9	262.921	8511.73	0	0	0	0	0	0	0	0	0	565.95	8511.73	0										1.68	25.04										31400	47602
0	6274	0	hcd	693.17	1878.67	131.144	1872.75	0	0	0	0	0	0	0	0	0	0	1872.75	0											3.96											33700
0	6275	0	hcd	339.29	8892.18	131.145	8718.29	0	0	0	0	0	0	0	0	0	308.78	8718.29	0											26.72											47502
0	6278	0	hcd	422.44	21106.7	508.299	14425.5	0	0	0	0	0	0	0	0	722.84	272.18	14425.5	0									2.01		38.27									33500		47802
0	6279	0	hcd	542.92	13115.2	131.145	13002.2	0	0	0	0	0	0	0	0	515.62	0	13002.2	0									1.33		33.26									33300		47702
0	6280	0	hcd	582.84	6457.72	131.145	6358.61	0	0	0	0	0	0	0	0	0	0	6358.61	0											14.58											45402
0	6283	0	hcd	458.81	244982	248.187	209924	0	0	0	0	0	0	0	0	7103.58	3799.15	209924	0									4.87		141.44									35000		48602
0	6284	0	hcd	530.96	4429.76	131.144	4386.74	0	0	0	0	0	0	0	0	0	0	4386.74	0											10.24											45100
0	6286	1	hcd	511.96	176944	591.292	136179	0	0	0	0	0	0	0	0	4374.03	2240.24	136179	0									4.31		133.29									34200		48802
0	6287	0	hcd	543.42	10173.2	131.145	10126.5	0	0	0	0	0	0	0	0	0	529.01	10126.5	0											24.04											46802
0	6288	0	hcd	570.24	6283.44	472.268	6237.9	0	0	0	0	0	0	0	0	0	0	6237.9	0											14.44											46102
0	6290	0	hcd	580.61	448852	131.145	448575	0	0	0	0	0	0	0	0	24470.6	10866	448575	0									14.16		247.38									45000		48902
0	6291	0	hcd	410.2	31421.9	131.144	31314	0	0	0	0	0	0	0	0	1076.09	905.82	31314	0									3		85.65									33100		48802
0	6292	0	hcd	672.63	8257.29	131.144	8063.96	0	0	0	0	0	0	0	0	0	0	8063.96	0											16.74											46302
0	6294	0	hcd	521.74	32569.4	301.059	21034.4	0	0	0	0	0	0	0	0	751.36	799.6	21034.4	0									1.89	2.07	50.48									31600	67200	48702
0	6295	0	hcd	752	7563.69	681.342	6210.87	0	0	0	0	0	0	0	0	0	0	6210.87	0											12.66											45000
0	6296	0	hcd	399.96	12145	131.145	11858.3	0	0	0	0	0	0	0	0	746.01	450.91	11858.3	0									2.06	1.35	32.77									34900	53900	47302
0	6299	0	hcd	359.55	12294.7	131.145	12284.8	0	0	0	0	0	0	0	0	0	226.68	12284.8	0											39.17											47802
0	6300	0	hcd	545.92	16902	131.145	16417.3	0	0	0	0	0	0	0	0	0	849.98	16417.3	0										1.9	37.73										54000	47902
0	6303	0	hcd	454.4	12272.6	131.145	12152.2	0	0	0	0	0	0	0	0	0	241.83	12152.2	0											32.47											47502
0	6304	0	hcd	672.96	5838.36	131.144	5743.44	0	0	0	0	0	0	0	0	0	0	5743.44	0											11.71											45600
0	6307	0	hcd	623.27	15911.6	574.534	9225.39	0	0	0	0	0	0	0	0	0	417.98	9225.39	0											20.17											45902
0	6310	0	hcd	547.25	22113.8	131.144	21901.6	0	0	0	0	0	0	0	0	0	726.97	21901.6	0											54.87											48402
0	6311	0	hcd	483.93	13652.9	131.145	13542.8	0	0	0	0	0	0	0	0	0	596.91	13542.8	0										1.58	34.81										58800	47102
0	6312	0	hcd	443.69	28273.6	131.144	28213.1	0	0	0	0	0	0	0	0	0	449.96	28213.1	0											74.93											48602
0	6313	0	hcd	341.18	16801.2	300.684	15724.5	0	0	0	0	0	0	0	0	527.76	797.94	15724.5	0									1.5	2.25	44.68									32000	61100	48302
0	6317	0	hcd	561.13	7985.96	131.145	7944.64	0	0	0	0	0	0	0	0	0	0	7944.64	0											19.26											46602
0	6318	0	hcd	644.91	7827.97	131.144	7718.54	0	0	0	0	0	0	0	0	0	315.93	7718.54	0											17.26											45802
0	6319	0	hcd	409.97	16208.8	131.144	16059.4	0	0	0	0	0	0	0	0	569.52	274.08	16059.4	0									1.54		41.76									32500		47902
0	6321	0	hcd	614.95	20757.3	131.145	20577.3	0	0	0	0	0	0	0	0	0	1340.95	20577.3	0										3.05	46.86										61600	48502
0	6322	0	hcd	682.28	58967.8	590.31	42563.9	0	0	0	0	0	0	0	0	1362.13	1128.65	42563.9	0									2.85		85.47									32900		48702
0	6323	0	hcd	833.36	6399.18	580.808	1406.32	0	0	0	0	0	0	0	0	0	0	1406.32	0											2.44											32700
0	6327	0	hcd	497.58	34934.3	131.144	34730.8	0	0	0	0	0	0	0	0	0	565.34	34730.8	0											87											48802
0	6328	0	hcd	585.78	7878.1	131.145	7688.01	0	0	0	0	0	0	0	0	0	0	7688.01	0											17.32											46802
0	6331	0	hcd	364.54	13451.2	131.145	13437.1	0	0	0	0	0	0	0	0	0	123.93	13437.1	0											38.65											47706
0	6332	0	hcd	549.52	13239.9	131.144	13146.5	0	0	0	0	0	0	0	0	0	132.97	13146.5	0											31.76											47802
0	6333	1	hcd	529.16	6588.42	415.845	5160.9	0	0	0	0	0	0	0	0	0	0	5160.9	0											12.54											45900
0	6336	0	hcd	575.76	7066.48	131.144	7002.57	0	0	0	0	0	0	0	0	0	0	7002.57	0											16.42											45702
0	6337	0	hcd	780.01	14583.6	1160.61	10394.8	0	0	0	0	0	0	0	0	0	0	10394.8	0											20.08											46402
0	6338	0	hcd	482.96	14305.3	131.144	14150.3	0	0	0	0	0	0	0	0	804.54	899	14150.3	0									2.14	2.29	36.08									31100	53000	47902
0	6340	0	hcd	435.71	54690.7	371.24	47341.3	0	0	0	0	0	0	0	0	763.3	729.78	47341.3	0									1.65		102.15									35800		48902
0	6341	0	hcd	524.02	50012.2	131.144	49667.6	0	0	0	0	0	0	0	0	1327.55	1457.48	49667.6	0									3.14		112.82									32700		49102
0	6344	0	hcd	701.29	9117.83	131.144	9072.41	0	0	0	0	0	0	0	0	0	0	9072.41	0											19.2											46002
0	6345	0	hcd	644.78	12579.5	131.144	12576.2	0	0	0	0	0	0	0	0	0	844.89	12576.2	0										1.77	25.9										40800	47002
0	6346	0	hcd	398.9	19157.4	131.145	19095.2	0	0	0	0	0	0	0	0	481.24	961.69	19095.2	0									1.34	2.67	53.07									36000	68400	48102
0	6347	0	hcd	698.36	14343.9	131.145	13963.6	0	0	0	0	0	0	0	0	0	0	13963.6	0											29.84											47802
0	6351	0	hcd	533.74	27172	239.095	15314.1	0	0	0	0	0	0	0	0	0	346.76	15314.1	0											36.68											47902
0	6352	0	hcd	689.94	6586.62	131.144	6574.54	0	0	0	0	0	0	0	0	0	0	6574.54	0											13.8											44700
0	6353	0	hcd	603.93	20645.3	131.145	20439.5	0	0	0	0	0	0	0	0	0	923.91	20439.5	0										2.08	43.55										56500	48102
0	6356	1	hcd	452.95	83380.1	364.534	54735.1	0	0	0	0	0	0	0	0	1456.26	1138.86	54735.1	0									3.42		122.48									33200		48802
0	6357	0	hcd	419.42	384851	376.823	347516	0	0	0	0	0	0	0	0	15275.8	8851.59	347516	0									10.3		219.51									46200		49002
0	6358	0	hcd	487.03	31799.6	131.145	31794.2	0	0	0	0	0	0	0	0	674.21	509.15	31794.2	0									1.7		78.33									34100		48502
0	6359	0	hcd	549.77	42828.4	131.145	42605.8	0	0	0	0	0	0	0	0	0	843.41	42605.8	0											99.26											49002
0	6360	0	hcd	499.21	11798.3	131.144	11739.4	0	0	0	0	0	0	0	0	0	21.09	11739.4	0											28.81											47602
0	6361	0	hcd	489.79	18866	131.145	18736.2	0	0	0	0	0	0	0	0	0	352.28	18736.2	0											44.82											47806
0	6363	0	hcd	633.28	14856.6	131.145	14675.3	0	0	0	0	0	0	0	0	0	0	14675.3	0											32.55											47502
0	6364	0	hcd	621.51	6074.18	131.144	6013.95	0	0	0	0	0	0	0	0	0	0	6013.95	0											13.19											43400
0	6365	1	hcd	534.58	92985.7	131.145	92644.4	0	0	0	0	0	0	0	0	4678.98	2553.79	92644.4	0									11.56		217.07									45900		49402
0	6366	0	hcd	472.98	89162.3	360.914	38360.3	0	0	0	0	0	0	0	0	1415.66	463.25	38360.3	0									3.55		94.1									31600		48702
0	6367	0	hcd	486.23	37258.7	131.145	37186.1	0	0	0	0	0	0	0	0	1417.27	665.8	37186.1	0									3.62		93.93									33200		48702
0	6368	0	hcd	521.45	46139.5	301.058	20293.2	0	0	0	0	0	0	0	0	618.3	186.52	20293.2	0									1.41		45.79									33100		47802
0	6369	0	hcd	378.78	21381.3	131.145	21300.7	0	0	0	0	0	0	0	0	0	351.74	21300.7	0											58.86											48002
0	6370	0	hcd	694.93	8816.64	131.145	8661.11	0	0	0	0	0	0	0	0	0	515.56	8661.11	0										1.1	18.67										18700	46602
0	6371	0	hcd	464.4	62095.6	361.026	14187.9	0	0	0	0	0	0	0	0	0	296.83	14187.9	0											35.06											47602
0	6373	0	hcd	526.47	24061.9	131.145	24002.3	0	0	0	0	0	0	0	0	0	458.29	24002.3	0											58.12											48402
0	6374	0	hcd	479.41	12395.6	131.145	12343.3	0	0	0	0	0	0	0	0	0	177.51	12343.3	0											30.67											47202
0	6375	0	hcd	563.76	17148.2	131.145	17088.1	0	0	0	0	0	0	0	0	0	383.49	17088.1	0											38.79											48002
0	6376	0	hcd	402.18	44214.2	225.043	11522.5	0	0	0	0	0	0	0	0	0	188.4	11522.5	0											32.79											47602
0	6377	0	hcd	570.26	9036.77	569.34	6860.79	0	0	0	0	0	0	0	0	0	0	6860.79	0											15.14											45102
0	6379	0	hcd	538.42	27880.7	299.062	22142.6	0	0	0	0	0	0	0	0	862.32	799.33	22142.6	0									2.12	1.99	52.55									31200	65300	48602
0	6380	0	hcd	507.98	27287.7	131.145	27249.5	0	0	0	0	0	0	0	0	664.29	429.55	27249.5	0									1.7		65.41									33500		48402
0	6381	0	hcd	329.93	40959.3	241.091	20724.2	0	0	0	0	0	0	0	0	574.06	352.25	20724.2	0									1.79		63.16									33900		48202
0	6382	0	hcd	702.59	5408.27	131.144	5397.11	0	0	0	0	0	0	0	0	0	0	5397.11	0											10.3											43100
0	6384	0	hcd	573.51	144090	131.145	143876	0	0	0	0	0	0	0	0	2232.53	3050.03	143876	0									4.67		287.75									33400		49102
0	6385	0	hcd	698.63	13556.5	131.145	13338.1	0	0	0	0	0	0	0	0	0	488.46	13338.1	0											27.42											47602
0	6386	0	hcd	336.39	25236.4	131.145	24697.6	0	0	0	0	0	0	0	0	611.49	351.41	24697.6	0									1.8		71.44									33600		48602
0	6388	0	hcd	555.23	32387.3	158.964	9986.84	0	0	0	0	0	0	0	0	0	0	9986.84	0											24.14											46902
0	6389	0	hcd	382.51	23111	131.145	23017.5	0	0	0	0	0	0	0	0	920.79	531.35	23017.5	0									2.66		64.18									32600		48602
0	6390	0	hcd	493.94	7165.78	131.145	7077.55	0	0	0	0	0	0	0	0	0	341.48	7077.55	0											18											45902
0	6393	0	hcd	514.49	22678	131.145	22550.6	0	0	0	0	0	0	0	0	649.38	504.06	22550.6	0									1.69		57.12									33900		48802
0	6394	1	hcd	436.46	39247.4	131.145	39189.8	0	0	0	0	0	0	0	0	1041.46	734.55	39189.8	0									2.73		100.54									32900		48302
0	6395	0	hcd	405.94	64071	131.145	63733.3	0	0	0	0	0	0	0	0	1489.66	1919.26	63733.3	0									3.82		160.57									32300		48902
0	6398	0	hcd	428.19	22542.4	472.288	16124.6	0	0	0	0	0	0	0	0	0	203.44	16124.6	0											43.78											47602
0	6399	0	hcd	700.26	10810.5	131.144	10798.6	0	0	0	0	0	0	0	0	0	0	10798.6	0											21.66											47002
0	6400	0	hcd	811.37	8407.56	131.145	8407.56	0	0	0	0	0	0	0	0	0	0	8407.56	0											14.83											46202
0	6403	0	hcd	500.76	19410.5	131.144	19277.8	0	0	0	0	0	0	0	0	0	273.15	19277.8	0											48.67											47802
0	6404	0	hcd	362.47	29967.8	528.325	9176.59	0	0	0	0	0	0	0	0	0	419.86	9176.59	0											27.18											46802
0	6407	0	hcd	585.26	44108.9	532.018	35321.6	0	0	0	0	0	0	0	0	0	676.39	35321.6	0											82.19											48702
0	6408	0	hcd	621.93	11455.7	131.145	11430.4	0	0	0	0	0	0	0	0	0	810.63	11430.4	0										1.88	25.7										31300	47402
0	6409	0	hcd	563.27	19773.2	332.192	10095.8	0	0	0	0	0	0	0	0	0	547.41	10095.8	0										1.32	24										30900	46702
0	6410	0	hcd	700.59	8000.31	131.144	7953.48	0	0	0	0	0	0	0	0	0	326.65	7953.48	0											16.57											45102
0	6411	0	hcd	647.28	9683.99	131.145	9532.69	0	0	0	0	0	0	0	0	0	0	9532.69	0											20.98											46602
0	6414	0	hcd	503.64	13853.8	131.144	13756.6	0	0	0	0	0	0	0	0	0	184.96	13756.6	0											35.89											47602
0	6415	0	hcd	778.66	6444.71	131.144	6384.19	0	0	0	0	0	0	0	0	0	0	6384.19	0											12.84											46300
0	6416	0	hcd	480.17	7741.8	248.187	6799.92	0	0	0	0	0	0	0	0	0	353.32	6799.92	0											17.19											45902
0	6417	0	hcd	604.28	18597.5	131.144	18296.9	0	0	0	0	0	0	0	0	0	436.82	18296.9	0											41.08											48302
0	6420	0	hcd	676.96	40934.6	611.646	39122.2	0	0	0	0	0	0	0	0	1685.06	841.26	39122.2	0									3.55		79.59									33000		48302
0	6421	0	hcd	346.89	19823	341.214	19394.3	0	0	0	0	0	0	0	0	529.85	697.1	19394.3	0									1.48	2.01	54.45									33100	66000	48302
0	6424	0	hcd	561.44	19249.3	158.964	16682.1	0	0	0	0	0	0	0	0	0	133.63	16682.1	0											36.62											47702
0	6426	0	hcd	601.77	15054	131.144	14909.8	0	0	0	0	0	0	0	0	0	156.31	14909.8	0											36.05											47802
0	6427	1	hcd	580.28	81199.7	131.145	81083.4	0	0	0	0	0	0	0	0	4317.33	1942.87	81083.4	0									9.58		170.42									45300		49002
0	6428	0	hcd	496.58	22040	131.144	21986.3	0	0	0	0	0	0	0	0	0	321.31	21986.3	0											54.56											48002
0	6429	0	hcd	691.61	10769.1	131.144	10378.8	0	0	0	0	0	0	0	0	0	559.34	10378.8	0											21.53											47102
0	6432	0	hcd	397.47	42872.1	131.145	42871.7	0	0	0	0	0	0	0	0	663.34	1077.14	42871.7	0									1.78		109.46									32800		48702
0	6433	0	hcd	450.48	23238.1	131.144	23157.5	0	0	0	0	0	0	0	0	0	433.65	23157.5	0											64.36											48202
0	6434	0	hcd	729.33	11105.3	131.144	11022.1	0	0	0	0	0	0	0	0	0	698.73	11022.1	0										1.44	22.58										32800	46202
0	6435	0	hcd	701.05	7236.01	131.144	7212.41	0	0	0	0	0	0	0	0	0	312.37	7212.41	0											15.3											45202
0	6436	0	hcd	588.33	17501.8	131.145	17192.7	0	0	0	0	0	0	0	0	0	946.61	17192.7	0										2.11	38.52										52800	48402
0	6439	0	hcd	529.95	58986.7	131.145	58880.8	0	0	0	0	0	0	0	0	646.35	1390.35	58880.8	0									1.51		134.07									31200		48902
0	6440	0	hcd	587.83	26271.1	517.827	18439.4	0	0	0	0	0	0	0	0	0	760.36	18439.4	0										1.75	39.93										61500	47902
0	6443	0	hcd	524.95	61888.3	131.144	61614.5	0	0	0	0	0	0	0	0	1440.36	1348.09	61614.5	0									3.36		137.01									32900		48702
0	6444	0	hcd	483.98	50569.8	131.145	50439.2	0	0	0	0	0	0	0	0	1815.26	1162.17	50439.2	0									4.63		122.89									34900		48602
0	6445	0	hcd	437.8	21155.9	131.145	20903.2	0	0	0	0	0	0	0	0	0	744.74	20903.2	0										1.81	52.02										64000	48402
0	6447	1	hcd	635.58	38569.1	516.271	32871	0	0	0	0	0	0	0	0	987.47	469.92	32871	0									2.2		70.31									33000		48602
0	6448	0	hcd	601.52	9342.99	131.145	9252.81	0	0	0	0	0	0	0	0	0	340.27	9252.81	0											21.48											47502
0	6449	0	hcd	628.96	5031.45	131.144	5012.31	0	0	0	0	0	0	0	0	0	0	5012.31	0											10.48											43600
0	6450	0	hcd	716.79	2510.81	131.144	2475.19	0	0	0	0	0	0	0	0	0	0	2475.19	0											4.77											34200
0	6453	0	hcd	515.25	73252.6	131.145	73006.3	0	0	0	0	0	0	0	0	3788.72	1722.66	73006.3	0									9.23		167.94									49300		49002
0	6454	0	hcd	405.96	61730.3	131.145	61698.7	0	0	0	0	0	0	0	0	995.26	1333.98	61698.7	0									2.7		159.68									33600		48802
0	6455	0	hcd	521.76	40466.5	131.145	40315.2	0	0	0	0	0	0	0	0	1024.81	824.25	40315.2	0									2.56		99.46									32000		48702
0	6456	0	hcd	336.92	33394.3	131.145	33326.8	0	0	0	0	0	0	0	0	530.57	617.95	33326.8	0									1.65		101.97									35200		48702
0	6457	0	hcd	638.27	38208.2	248.187	26046.9	0	0	0	0	0	0	0	0	750.36	0	26046.9	0									1.58		54.91									36800		48302
0	6459	0	hcd	488.96	23491.3	131.145	23449.9	0	0	0	0	0	0	0	0	0	296.2	23449.9	0											60.15											48202
0	6460	0	hcd	793.92	6210.71	131.144	6131.3	0	0	0	0	0	0	0	0	0	0	6131.3	0											12.28											44100
0	6461	1	hcd	478.96	90326.4	131.145	90263.4	0	0	0	0	0	0	0	0	3622.38	2231.43	90263.4	0									9.06		216.06									45800		48902
0	6462	0	hcd	359.87	46112.1	131.144	45461.8	0	0	0	0	0	0	0	0	962.58	1592.04	45461.8	0									2.65		125.51									34000		48902
0	6465	0	hcd	359.2	66921.8	131.145	66332.2	0	0	0	0	0	0	0	0	1684.08	2289.94	66332.2	0									5.01		192.43									35600		49302
0	6466	0	hcd	614.55	6879.52	131.145	6780.72	0	0	0	0	0	0	0	0	0	0	6780.72	0											14.9											45502
0	6467	0	hcd	522.01	29781.2	131.144	29640.2	0	0	0	0	0	0	0	0	0	648.11	29640.2	0											69.87											48502
0	6468	1	hcd	347.67	54106.7	131.145	53993.3	0	0	0	0	0	0	0	0	975.12	1127.46	53993.3	0									2.9		155.69									31900		48802
0	6469	0	hcd	764.34	14909.3	131.144	14735.7	0	0	0	0	0	0	0	0	0	357.83	14735.7	0											27.21											47802
0	6472	0	hcd	386.69	60655.2	233.498	34781.9	0	0	0	0	0	0	0	0	870.25	502.2	34781.9	0									1.93		75.08									33100		48402
0	6473	0	hcd	544.35	7402.08	248.187	6264.88	0	0	0	0	0	0	0	0	0	335.48	6264.88	0											14.8											46302
0	6476	0	hcd	476.94	46251.1	387.455	24754.6	0	0	0	0	0	0	0	0	1168.61	534.66	24754.6	0									2.82		58.33									33700		48502
0	6477	0	hcd	581.26	25491.6	131.144	25334.5	0	0	0	0	0	0	0	0	0	580.11	25334.5	0											60.19											48602
0	6478	0	hcd	478.6	119079	131.145	118432	0	0	0	0	0	0	0	0	5747.96	4067.56	118432	0									14.55		286.9									47300		49502
0	6481	1	hcd	437.72	119855	260.153	77241.4	0	0	0	0	0	0	0	0	2186.95	1597.04	77241.4	0									4.06		134.91									34800		48802
0	6482	0	hcd	576.34	6070.92	131.144	6041.6	0	0	0	0	0	0	0	0	0	0	6041.6	0											13.99											45000
0	6483	1	hcd	392.22	1.02813e+06	131.145	1.02677e+06	0	0	0	0	0	0	0	0	49737.2	27746.4	1.02677e+06	0									9.73		194.42									44900		49002
0	6484	0	hcd	465.82	22865.5	248.187	18673.1	0	0	0	0	0	0	0	0	0	373.15	18673.1	0											48.22											48502
0	6487	0	hcd	421.89	63879.2	131.144	63509.6	0	0	0	0	0	0	0	0	1228.09	1618.06	63509.6	0									3.22		161.38									32300		49002
0	6488	0	hcd	479.57	48528.4	131.145	48452.8	0	0	0	0	0	0	0	0	1285.65	1288.73	48452.8	0									3.13		117.18									34200		48802
0	6489	0	hcd	367.42	21817.4	131.145	21687.9	0	0	0	0	0	0	0	0	0	534.3	21687.9	0											60.32											48702
0	6492	0	hcd	583.29	28931.3	131.145	28916.5	0	0	0	0	0	0	0	0	0	518.28	28916.5	0											66.11											48402
0	6493	0	hcd	350.58	9960.07	131.145	9868.43	0	0	0	0	0	0	0	0	0	179.81	9868.43	0											29.11											47402
0	6496	0	hcd	607.94	15560.7	131.145	15560.6	0	0	0	0	0	0	0	0	686.2	84.79	15560.6	0									1.56		34.96									33200		47102
0	6497	0	hcd	442.68	24667.8	158.964	13376.5	0	0	0	0	0	0	0	0	0	187.51	13376.5	0											35.77											47802
0	6498	0	hcd	472.94	108171	360.914	16373.6	0	0	0	0	0	0	0	0	0	378.35	16373.6	0											41.69											47702
0	6499	0	hcd	441.42	16142.6	131.144	16112.7	0	0	0	0	0	0	0	0	0	145.25	16112.7	0											41.29											48002
0	6500	0	hcd	337.19	28943.2	325.863	25301	0	0	0	0	0	0	0	0	540.19	755.03	25301	0									1.7		76.89									30200		49002
0	6502	0	hcd	610.95	43650.2	355.07	28217.7	0	0	0	0	0	0	0	0	0	424.41	28217.7	0											64.05											48202
0	6503	0	hcd	456.2	21532.8	131.145	21420	0	0	0	0	0	0	0	0	518.23	452.95	21420	0									1.36		56.1									36200		48402
0	6504	0	hcd	597.73	11166.7	131.144	11141.8	0	0	0	0	0	0	0	0	0	688.2	11141.8	0										1.65	26.45										35700	46302
0	6505	0	hcd	500.48	13906	131.145	13646	0	0	0	0	0	0	0	0	561.71	567.52	13646	0									1.43		35.32									35300		48302
0	6508	0	hcd	440.23	108229	131.145	108127	0	0	0	0	0	0	0	0	1966.28	2949.88	108127	0									5.07		269.73									34800		49302
0	6509	0	hcd	557.58	21930.4	131.145	21876.9	0	0	0	0	0	0	0	0	0	375.8	21876.9	0											53.09											48302
0	6510	0	hcd	536.54	144952	299.062	13021	0	0	0	0	0	0	0	0	0	102.17	13021	0											29.29											47302
0	6511	0	hcd	711.97	15051.5	131.145	15050.3	0	0	0	0	0	0	0	0	0	796.24	15050.3	0										1.59	29.15										57100	47402
0	6514	0	hcd	590.91	17885.3	131.144	17868.4	0	0	0	0	0	0	0	0	549.74	60.4	17868.4	0									1.3		41.9									33100		47802
0	6515	0	hcd	597.47	8931.67	131.145	8771.27	0	0	0	0	0	0	0	0	0	0	8771.27	0											18.94											45902
0	6518	1	hcd	346.68	51187.7	272.172	27340.4	0	0	0	0	0	0	0	0	931.22	469.21	27340.4	0									2.72		78.58									33900		48602
0	6519	0	hcd	340.44	26530.4	131.145	26504.4	0	0	0	0	0	0	0	0	515.8	630.98	26504.4	0									1.6		78.11									32300		48502
0	6520	0	hcd	316.93	41263	425.262	26756.8	0	0	0	0	0	0	0	0	1351.4	808.39	26756.8	0									4.11		78.19									34400		48502
0	6523	0	hcd	422.24	33136.7	131.145	33136.7	0	0	0	0	0	0	0	0	1201.98	669.26	33136.7	0									3.3		87.29									33300		48602
0	6524	0	hcd	582.03	35637	248.187	28972.8	0	0	0	0	0	0	0	0	773.38	546.62	28972.8	0									1.92		69.03									36100		48502
0	6525	0	hcd	322.44	53769.6	131.145	53667.6	0	0	0	0	0	0	0	0	1117.2	1309.93	53667.6	0									3.43		156.66									32900		48902
0	6526	0	hcd	630.25	12637.4	248.187	8106	0	0	0	0	0	0	0	0	0	0	8106	0											16.36											45802
0	6529	0	hcd	485.96	12312.2	131.145	12256.3	0	0	0	0	0	0	0	0	0	241.8	12256.3	0											31.31											47902
0	6530	0	hcd	361.71	36190.6	131.145	35546.6	0	0	0	0	0	0	0	0	1423.9	1464.31	35546.6	0									3.99	3.74	97.99									33700	66000	48802
0	6533	0	hcd	431.14	26223.5	208.953	9552.02	0	0	0	0	0	0	0	0	0	508.51	9552.02	0										1.39	25.94										43000	46702
0	6534	0	hcd	633.3	10265.8	131.145	10099	0	0	0	0	0	0	0	0	0	487.83	10099	0											21.19											46802
0	6538	0	hcd	458.47	173197	131.145	172099	0	0	0	0	0	0	0	0	2924.22	3165.79	172099	0									3.39		189.71									30600		49402
0	6541	0	hcd	469.48	31556.8	131.145	31535.1	0	0	0	0	0	0	0	0	1154.12	530.39	31535.1	0									2.95		79.46									33700		48202
0	6542	0	hcd	521.58	50397.2	299.062	29398.9	0	0	0	0	0	0	0	0	796.5	554.61	29398.9	0									2.05		71.36									34200		48602
0	6543	0	hcd	415.2	13871.5	131.145	13839.3	0	0	0	0	0	0	0	0	0	169.61	13839.3	0											38.6											47802
0	6544	0	hcd	630.92	19309.2	248.187	12487.6	0	0	0	0	0	0	0	0	0	680.37	12487.6	0											27.91											47102
0	6545	0	hcd	407.4	34680.3	131.145	34125.8	0	0	0	0	0	0	0	0	0	0	34125.8	0											93.78											48902
0	6548	0	hcd	448.75	29364.6	362.026	23152.2	0	0	0	0	0	0	0	0	0	500.54	23152.2	0											60.35											48102
0	6549	0	hcd	539.6	38558.5	296.683	27975.5	0	0	0	0	0	0	0	0	0	301.85	27975.5	0											66.09											48202
0	6550	0	hcd	647.96	14285.2	131.144	14253.3	0	0	0	0	0	0	0	0	0	159.67	14253.3	0											29.87											47202
0	6553	0	hcd	625.3	13788.8	131.145	13714	0	0	0	0	0	0	0	0	894.78	122.59	13714	0									2.04		30.92									33400		47402
0	6554	0	hcd	319.22	255970	319.224	116106	0	0	0	0	0	0	0	0	842.41	3401.49	116106	0									2.54		338.83									32700		49202
0	6555	0	hcd	618.28	10478.2	131.145	10342.1	0	0	0	0	0	0	0	0	0	535.06	10342.1	0											23.43											46302
0	6556	0	hcd	711.91	19565	131.145	19133.8	0	0	0	0	0	0	0	0	0	1041.46	19133.8	0										2.07	38.84										57000	48102
0	6559	0	hcd	408.89	100845	149.023	48140.7	0	0	0	0	0	0	0	0	1122.54	894.51	48140.7	0									3.25		133.74									33500		48902
0	6560	0	hcd	394.88	31007.8	131.145	30397.1	0	0	0	0	0	0	0	0	1056.6	0	30397.1	0									2.91		84.2									34600		49002
0	6563	0	hcd	584.5	22594.2	511.014	15159.4	0	0	0	0	0	0	0	0	0	194.01	15159.4	0											34.15											47402
0	6564	0	hcd	643.62	13802.9	131.145	13591.8	0	0	0	0	0	0	0	0	635.35	613.16	13591.8	0									1.34	1.33	28.88									34200	49500	46702
0	6567	0	hcd	442.56	44826.8	131.145	44772.6	0	0	0	0	0	0	0	0	1194.38	1105.76	44772.6	0									3.21		114.59									32900		49002
0	6568	0	hcd	405.2	15298.6	131.145	15267.9	0	0	0	0	0	0	0	0	0	82.19	15267.9	0											42.16											48102
0	6569	1	hcd	520.58	189560	131.145	188909	0	0	0	0	0	0	0	0	2842.45	5095.87	188909	0									3.9		252.73									33700		49502
0	6570	0	hcd	411.79	23283.2	131.145	23184.9	0	0	0	0	0	0	0	0	819.61	854.48	23184.9	0									2.26	2.35	62.75									33000	71000	48402
0	6571	0	hcd	394.46	32127.3	131.145	31644.9	0	0	0	0	0	0	0	0	905.59	0	31644.9	0									2.4		84.08									31400		48702
0	6576	0	hcd	617.61	12918.6	131.145	12913.9	0	0	0	0	0	0	0	0	0	662.02	12913.9	0											28.32											46802
0	6577	0	hcd	452.56	32395.4	131.145	31940.4	0	0	0	0	0	0	0	0	0	0	31940.4	0											79.38											48802
0	6580	1	hcd	511.96	152000	438.731	121367	0	0	0	0	0	0	0	0	4786.77	1596.05	121367	0									4.55		111.11									33100		48602
0	6581	0	hcd	780.36	17223.3	731.369	13733.1	0	0	0	0	0	0	0	0	0	861.68	13733.1	0										1.62	25.81										32300	47402
0	6582	1	hcd	400.89	48628.5	131.145	48176.5	0	0	0	0	0	0	0	0	1090.24	0	48176.5	0									2.88		123.83									33400		49102
0	6586	0	hcd	458.81	102671	131.145	102561	0	0	0	0	0	0	0	0	2297.4	1300.35	102561	0									3.76		158.33									34100		48702
0	6589	0	hcd	546.31	144749	476.309	62480.6	0	0	0	0	0	0	0	0	3444.84	1603.49	62480.6	0									7.94		142.8									47400		49002
0	6590	0	hcd	540.91	29075.7	131.145	29028.3	0	0	0	0	0	0	0	0	0	340.52	29028.3	0											67.93											48702
0	6591	0	hcd	611.29	55120.2	131.145	55117.9	0	0	0	0	0	0	0	0	1441.22	773.67	55117.9	0									3.13		117.38									35400		48802
0	6592	0	hcd	376.38	36471.3	131.145	36454.8	0	0	0	0	0	0	0	0	0	498.39	36454.8	0											103.05											48402
0	6593	0	hcd	516.21	24409.9	131.145	24205.3	0	0	498.68	0	0	0	0	0	1125.69	367.84	24205.3	0			1.22						2.84		58.39			31900						33700		48506
0	6596	1	hcd	600.32	220841	600.323	59842.5	0	0	0	0	0	0	0	0	1503.65	0	59842.5	0									3.49		134.36									33000		48902
0	6597	0	hcd	437.13	17485.7	131.145	17274	0	0	0	0	0	0	0	0	0	951.98	17274	0										2.44	44.57										58800	47802
0	6601	0	hcd	463.53	93079.2	360.029	88322.2	0	0	0	0	0	0	0	0	4146.37	1857.09	88322.2	0									10.33		210.6									44500		49202
0	6602	0	hcd	427.59	30592.9	131.145	30592.9	0	0	0	0	0	0	0	0	0	16.43	30592.9	0											73.3											48602
0	6605	0	hcd	520.23	87470.9	131.145	87256	0	0	0	0	0	0	0	0	3609.5	519.76	87256	0									4.29		99.68									34500		48602
0	6606	0	hcd	419.32	281449	149.024	44211.2	0	0	0	0	0	0	0	0	789.13	586.82	44211.2	0									2.09		115.29									34400		48702
0	6607	0	hcd	431.22	32965	307.188	31480	0	0	0	0	0	0	0	0	867.6	335.68	31480	0									2.33		83.96									34200		48602
0	6612	0	hcd	469.98	73396.1	131.145	73345.6	0	0	0	0	0	0	0	0	2197.05	1264.96	73345.6	0									5.9		189.28									35900		48802
0	6613	0	hcd	306.21	799408	306.212	455307	0	0	0	0	0	0	0	0	0	6303.48	455307	0											764.68											49302
0	6614	0	hcd	493.89	25079.5	131.145	24601.8	0	0	0	0	0	0	0	0	1366.03	235.16	24601.8	0									3.32		59.74									33600		48502
0	6616	0	hcd	682.62	32649.6	131.145	32512.5	0	0	0	0	0	0	0	0	917.12	0	32512.5	0									1.96		68.17									35200		48402
0	6617	0	hcd	368.52	14786.8	131.145	14560.1	435.12	0	0	0	0	0	0	0	0	818.33	14560.1	0	1.33									2.47	44.53	31600									62400	48002
0	6618	0	hcd	381.36	36382.1	131.145	35353.2	0	0	0	0	0	0	0	0	1189.69	1176.42	35353.2	0									3.46	3.54	101.65									34200	70700	49002
0	6621	0	hcd	539.3	95178.9	469.302	37067.5	0	0	0	0	0	0	0	0	1076.01	1287.68	37067.5	0									2.36	2.91	81.53									32900	77300	48702
0	6622	0	hcd	637.53	22512.7	131.145	22176	0	0	0	0	0	0	0	0	0	271.23	22176	0											47.89											48602
0	6623	0	hcd	311.13	1.80226e+06	239.095	7893.57	0	0	0	0	0	0	0	0	0	0	7893.57	0											18.06											46102
0	6625	0	hcd	364.54	1.18614e+06	131.145	1.16117e+06	0	0	0	0	0	0	0	0	34576.6	39829.8	1.16117e+06	0									3.08	3.6	103.46									35000	79800	49002
0	6626	0	hcd	661.54	12203.5	131.145	11800.3	0	0	0	0	0	0	0	0	0	0	11800.3	0											26.32											47902
0	6627	0	hcd	442.2	27237.2	472.288	18330.4	0	0	0	0	0	0	0	0	0	887	18330.4	0										2.25	46.66										59200	48102
0	6630	0	hcd	399.55	31388.7	517.829	29139.8	0	0	0	0	0	0	0	0	1205.7	329.89	29139.8	0									3.54		83.66									32100		48702
0	6631	0	hcd	530.48	21925.1	131.145	21825.8	0	0	0	0	0	0	0	0	0	1191.66	21825.8	0										2.96	54.19										67000	48402
0	6632	0	hcd	493.91	26139.1	131.145	25651.8	0	0	0	0	0	0	0	0	0	957.89	25651.8	0										2.41	64.6										69900	48502
0	6635	0	hcd	591.92	49138.6	131.145	48916	0	0	0	0	0	0	0	0	928.27	606.3	48916	0									1.5		78.21									35000		48502
0	6636	0	hcd	644.82	419848	538.839	97820.2	0	0	0	0	0	0	0	0	2259.25	4788.64	97820.2	0									4.05		182.57									34100		49602
0	6638	0	hcd	407.73	102842	131.145	102181	0	0	0	0	0	0	0	0	4538.54	1318.54	102181	0									12.26		267.38									44200		49402
0	6639	0	hcd	547.25	61777.5	131.145	60786.8	0	0	0	0	0	0	0	0	1225.78	0	60786.8	0									2.68		132.33									34300		49002
0	6641	0	hcd	326.59	179819	174.992	66073	0	0	0	0	0	0	0	0	919.2	329.24	66073	0									1.44		102.8									36300		48502
0	6642	0	hcd	379.55	28178.6	248.187	20004	0	0	0	0	0	0	0	0	0	132.76	20004	0											56.17											48402
0	6644	0	hcd	534.23	433229	248.187	412184	0	0	0	0	0	0	0	0	15852.6	6568.46	412184	0									8.82		213.54									47400		49202
0	6647	0	hcd	577.23	19592.4	241.082	6359.5	0	0	0	0	0	0	0	0	0	0	6359.5	0											14.03											45302
0	6650	0	hcd	522.48	47223.5	131.145	46877.4	0	0	0	0	0	0	0	0	917.48	1626.59	46877.4	0									2.21	4.07	111.37									32700	68800	49002
0	6651	0	hcd	610.93	46965.6	355.07	23662.3	0	0	0	0	0	0	0	0	997.02	294.09	23662.3	0									2.38		53.54									33400		48502
0	6652	0	hcd	472.23	37023	360.914	30636.3	0	0	0	0	0	0	0	0	0	752.78	30636.3	0											80.06											48902
0	6655	0	hcd	544.9	23553.5	569.268	8271.26	0	0	0	0	0	0	0	0	0	620.96	8271.26	0										1.57	20.04										31000	47002
0	6656	0	hcd	432.92	28029.2	241.082	16578.7	0	0	0	0	0	0	0	0	0	0	16578.7	0											41.98											47402
0	6657	0	hcd	414.72	29375.8	131.145	28915.5	0	0	0	0	0	0	0	0	810.73	984.63	28915.5	0									2.23	2.78	79.56									32400	71700	48602
0	6660	0	hcd	522.23	60645.1	131.145	60451.9	0	0	0	0	0	0	0	0	853.55	1154.69	60451.9	0									2.17		149.66									36700		49002
0	6661	0	hcd	738.96	8226.82	640.982	1200.63	0	0	0	0	0	0	0	0	0	0	1200.63	0											2.21											34600
0	6664	0	hcd	438.37	25317.3	131.145	25317.3	0	0	0	0	0	0	0	0	0	966.15	25317.3	0										2.57	66.32										70100	48502
0	6665	0	hcd	559.28	37691.8	131.145	37455.4	0	0	0	0	0	0	0	0	1067.47	1241.08	37455.4	0									2.56	3	88.39									35500	79100	48702
0	6666	0	hcd	538.51	174843	248.187	98895.6	0	0	0	0	0	0	0	0	2928.34	0	98895.6	0									2.87		94.7									34400		48802
0	6667	0	hcd	431.01	63570.8	248.187	29198.4	0	0	0	0	0	0	0	0	0	180.52	29198.4	0											73.54											48402
0	6669	0	hcd	424.9	39954	131.145	39621.2	0	0	0	0	0	0	0	0	1217.53	797.65	39621.2	0									3.4		106.19									34600		48902
0	6670	0	hcd	482.73	25381	131.145	25248.1	0	0	0	0	0	0	0	0	687.37	260.36	25248.1	0									1.76		64.17									32200		48802
0	6671	0	hcd	488.9	80380.6	131.145	79958.7	0	0	0	0	0	0	0	0	734.41	2217.14	79958.7	0									1.89		196.55									32600		49202
0	6672	0	hcd	718.01	17525.6	248.187	12673	0	0	0	0	0	0	0	0	0	0	12673	0											25.88											47202
0	6674	0	hcd	573.51	71717.7	131.145	71716.3	0	0	0	0	0	0	0	0	2163.02	1070.13	71716.3	0									4.82		154.92									35000		49002
0	6675	0	hcd	409.93	17969.5	131.145	17888	0	0	0	0	0	0	0	0	626.94	347.38	17888	0									1.71		48.92									32500		48302
0	6676	0	hcd	551.57	17123.9	131.145	16783	0	0	0	0	0	0	0	0	0	958.6	16783	0										2.27	40.44										58000	48202
0	6679	0	hcd	569.76	27843.8	131.145	27840.4	0	0	0	0	0	0	0	0	0	424.48	27840.4	0											67.92											48402
0	6680	0	hcd	554.47	11195.1	131.145	10974.8	0	0	0	0	0	0	0	0	0	390.48	10974.8	0											24.39											46802
0	6684	0	hcd	413.27	27040.8	413.266	15466.5	0	0	0	0	0	0	0	0	0	223.26	15466.5	0											41.9											47602
0	6685	0	hcd	432.31	20180.3	131.145	20153.5	0	0	0	0	0	0	0	0	553.05	318.84	20153.5	0									1.53		54.99									32900		48402
0	6686	0	hcd	718.34	13033	131.145	13033	0	0	0	0	0	0	0	0	0	0	13033	0											25.34											47302
0	6689	0	hcd	455.81	53699.2	248.187	50829.1	0	0	0	0	0	0	0	0	1279.34	1010.12	50829.1	0									3.25		125.14									33900		48602
0	6690	0	hcd	500.9	21871	131.145	21837.4	0	0	0	0	0	0	0	0	0	145.19	21837.4	0											53.56											47802
0	6691	0	hcd	527.25	43415	131.145	42908.7	0	0	0	0	0	0	0	0	1384.16	1384.23	42908.7	0									3.25	3.36	99.32									34000	70100	49202
0	6694	0	hcd	438.89	36494.7	131.145	36470.8	0	0	0	0	0	0	0	0	685.72	498.12	36470.8	0									1.95		97.26									34100		48802
0	6695	0	hcd	643.64	15962.5	131.145	15851.9	0	0	0	0	0	0	0	0	777.48	636.5	15851.9	0									1.67	1.44	33.09									32600	55000	47402
0	6698	0	hcd	647.61	25234.8	131.145	24971.9	0	0	0	0	0	0	0	0	0	586.09	24971.9	0											56.11											48206
0	6699	0	hcd	546.76	34849.7	131.145	34719.1	0	0	0	0	0	0	0	0	912.63	677.8	34719.1	0									2.23		79.66									34700		48802
0	6700	0	hcd	384.19	25420.3	401.695	7479.6	0	0	0	0	0	0	0	0	0	420.06	7479.6	0											21.02											47402
0	6701	0	hcd	347.71	11076.9	269.663	5348.21	0	0	0	0	0	0	0	0	0	0	5348.21	0											15.63											44502
0	6704	0	hcd	778.99	12426.6	131.144	12308.3	0	0	0	0	0	0	0	0	0	803.98	12308.3	0										1.57	23.99										30300	46902
0	6705	0	hcd	638.63	12248.7	131.145	12006.8	0	0	0	0	0	0	0	0	0	0	12006.8	0											25.37											47002
0	6708	0	hcd	560.94	18335.8	158.964	8791.31	0	0	0	0	0	0	0	0	0	434.07	8791.31	0											20.22											46502
0	6711	0	hcd	410.33	27235.4	131.145	27113.3	0	0	0	0	0	0	0	0	765.57	76.47	27113.3	0									2.14		71.45									34000		48402
0	6712	0	hcd	478.9	56753.4	131.145	56479.3	0	0	0	0	0	0	0	0	1469.74	1817.98	56479.3	0									3.75	4.6	137.09									32400	78500	49102
0	6713	0	hcd	600.27	11402.9	129.102	8126.32	0	0	0	0	0	0	0	0	0	0	8126.32	0											17.54											45902
0	6715	0	hcd	682.95	21336.6	131.145	21284.7	0	0	0	0	0	0	0	0	0	244.24	21284.7	0											45.74											48402
0	6716	0	hcd	471.98	24172.1	131.145	23809.6	0	0	0	0	0	0	0	0	0	594.69	23809.6	0											60.18											48502
0	6722	0	hcd	527.05	20475.4	370.183	11934.2	0	0	0	0	0	0	0	0	0	293.9	11934.2	0											29.23											47702
0	6723	0	hcd	397.46	23618.7	131.145	23334.8	0	0	0	0	0	0	0	0	713.04	0	23334.8	0									1.91		62.24									34800		48502
0	6725	0	hcd	587.83	1.12519e+06	517.828	343822	0	0	0	0	0	0	0	0	7815	5869.32	343822	0									2.79		120.97									33900		48902
0	6728	0	hcd	515.04	25096	131.145	25090.3	0	0	0	0	0	0	0	0	732.7	368.51	25090.3	0									1.82		58.68									33400		48302
0	6729	0	hcd	499.55	16456.6	131.145	16124.1	0	0	0	0	0	0	0	0	0	531.92	16124.1	0											39.33											47802
0	6731	1	hcd	635.92	27396	516.605	21331.4	0	0	0	0	0	0	0	0	812.77	1230.88	21331.4	0									1.82	2.7	46.95									35400	64400	48102
0	6732	0	hcd	509.91	73923.6	131.145	73852.3	0	0	0	0	0	0	0	0	1652.17	1765.1	73852.3	0									3.98		170.89									33800		49202
0	6733	0	hcd	580.95	14115.8	131.145	13878.8	0	0	0	0	0	0	0	0	784.55	382.9	13878.8	0									1.83		32.69									34100		47402
0	6736	0	hcd	527.2	29231.4	370.183	14158.3	0	0	0	0	0	0	0	0	0	279.77	14158.3	0											35.51											47602
0	6737	0	hcd	628.97	23276.5	131.145	23104.3	0	0	0	0	0	0	0	0	0	428.28	23104.3	0											50.54											48206
0	6738	0	hcd	482.98	15283.4	131.145	15270.1	0	0	0	0	0	0	0	0	776.74	116.3	15270.1	0									2.09		39.55									33700		47202
0	6739	0	hcd	563	14770.7	131.144	14515.5	0	0	0	0	0	0	0	0	755.92	362.91	14515.5	0									1.69		32.94									34900		47502
0	6741	0	hcd	702.94	7486.42	370.182	1939.1	0	0	0	0	0	0	0	0	0	0	1939.1	0											4.01											34200
0	6742	0	hcd	323.41	22417.3	179.087	14592.5	0	0	0	0	0	0	0	0	0	209.04	14592.5	0											46.68											47902
0	6743	0	hcd	432.89	18743.8	131.145	18712.7	0	0	0	0	0	0	0	0	587.38	947.15	18712.7	0									1.59	2.6	50.48									33500	64000	48002
0	6744	0	hcd	315.78	31817.8	299.062	22826.2	0	0	0	0	0	0	0	0	0	293.04	22826.2	0											66.4											48602
0	6745	0	hcd	566.93	8456.46	131.145	8244.23	0	0	0	0	0	0	0	0	0	374.1	8244.23	0											18.65											46602
0	6747	0	hcd	359.87	448017	321.535	412940	0	0	0	0	0	0	0	0	10718.3	9498.43	412940	0									2.99		112.99									34500		48702
0	6748	0	hcd	488.96	16471.3	131.145	16311.3	0	0	0	0	0	0	0	0	0	614.77	16311.3	0										1.54	39.23										55700	47402
0	6750	0	hcd	393.97	97602.6	131.145	97504.8	0	0	0	0	0	0	0	0	1490.96	2637.4	97504.8	0									3.94		249.31									32700		49206
0	6751	0	hcd	472.91	92235.3	360.914	44459.6	0	0	0	0	0	0	0	0	1295.86	1272.46	44459.6	0									3.27		107.51									32600		49002
0	6753	0	hcd	402.21	48911.1	131.144	48730.9	0	0	0	0	0	0	0	0	771.7	1318.26	48730.9	0									2.18		132.86									31900		48902
0	6754	0	hcd	739.85	21891.8	620.868	20991.2	0	0	0	0	0	0	0	0	0	1177.58	20991.2	0										2.29	41.39										60400	48202
0	6756	0	hcd	482.88	21341.3	131.145	21252.5	0	0	0	0	0	0	0	0	0	1189.31	21252.5	0										2.85	51.15										65500	47902
0	6757	0	hcd	439.61	31842.4	131.145	31158.9	0	0	0	0	0	0	0	0	0	331.61	31158.9	0											80.54											48702
0	6759	0	hcd	408.59	114701	149.023	39435.1	0	0	0	0	0	0	0	0	810.07	873.24	39435.1	0									2.25		106.95									35000		48802
0	6760	0	hcd	504.84	33574.6	418.995	17763.1	0	0	0	0	0	0	0	0	0	399.7	17763.1	0											43.56											48106
0	6761	0	hcd	425.45	63369.8	328.687	17165.2	0	0	0	0	0	0	0	0	0	962.51	17165.2	0										2.38	42.86										61800	47702
0	6764	0	hcd	622.8	29129.2	131.144	28987.2	0	0	0	0	0	0	0	0	954	1090.49	28987.2	0									2.08	2.39	62.18									36000	72700	48302
0	6765	0	hcd	441.85	20312	131.144	20017.2	0	0	0	0	0	0	0	0	0	564.94	20017.2	0											48.13											47902
0	6768	0	hcd	392.22	5.70564e+06	131.145	5705330	0	0	0	0	0	0	0	0	109169	136470	5705330	0									2.76		138.8									33000		48702
0	6769	0	hcd	379.92	24983.6	131.144	24890.8	0	0	0	0	0	0	0	0	1070.41	507.74	24890.8	0									3.25		71.01									33500		48802
0	6770	0	hcd	759.01	17699.7	131.144	17494.3	0	0	0	0	0	0	0	0	0	237.57	17494.3	0											32.81											47102
0	6773	0	hcd	405.53	26437.4	559.268	24376.7	0	0	0	0	0	0	0	0	0	377.03	24376.7	0											64.92											48406
0	6774	1	hcd	362.87	60798.3	131.145	60404	0	0	0	0	0	0	0	0	600.54	1739.41	60404	0									1.65		163.85									33800		49202
0	6776	0	hcd	564.61	20569.4	131.145	20559.6	0	0	0	0	0	0	0	0	594.21	1065.73	20559.6	0									1.46	2.5	47.92									31000	69000	48006
0	6777	0	hcd	503.47	20335.4	131.145	20316.4	0	0	0	0	0	0	0	0	0	1222.92	20316.4	0										3.03	50.09										65100	47902
0	6778	0	hcd	708.87	24503.8	589.877	21660.8	0	0	0	0	0	0	0	0	0	449.51	21660.8	0											43.98											47902
0	6779	0	hcd	397.48	35630.2	131.145	35218.8	0	0	0	0	0	0	0	0	0	1331.76	35218.8	0											97.49											48602
0	6781	0	hcd	437.23	45400.3	131.145	45395.2	0	0	0	0	0	0	0	0	1574.1	835.48	45395.2	0									4.27		120.72									34400		48602
0	6782	0	hcd	306.93	27459.8	307.216	22171.7	0	0	0	0	0	0	0	0	0	363.98	22171.7	0											67.99											48206
0	6783	0	hcd	510.49	469531	248.187	377513	0	0	0	0	0	0	0	0	16600.7	10426.1	377513	0									9.93		212.44									45400		49002
0	6784	0	hcd	679.99	52492.2	131.145	52483.1	0	0	0	0	0	0	0	0	1287.65	1079.73	52483.1	0									2.75		108.33									34400		48502
0	6785	0	hcd	398.75	21867	131.145	21763.2	0	0	0	0	0	0	0	0	622.49	548.88	21763.2	0									1.71		59.72									37400		48202
0	6788	0	hcd	466.39	36117.7	131.145	36112.3	0	0	0	0	0	0	0	0	1101.56	539.02	36112.3	0									2.88		92.45									34200		48602
0	6789	0	hcd	640.45	6205.19	131.144	6062.11	0	0	0	0	0	0	0	0	0	216.43	6062.11	0											13.61											45100
0	6790	0	hcd	666.82	74800.7	617.827	26593.2	0	0	0	0	0	0	0	0	754.49	344.12	26593.2	0									1.66		54.76									34600		48002
0	6791	0	hcd	376.42	51733.3	131.145	51085.2	0	0	0	0	0	0	0	0	1089.53	1861.3	51085.2	0									3.23		146.5									33100		49202
0	6793	0	hcd	579.91	17167.7	131.145	17018.8	0	0	0	0	0	0	0	0	579.24	221.56	17018.8	0									1.34		39.25									32600		47902
0	6794	1	hcd	333.91	42122.7	391.211	20961.7	0	0	0	0	0	0	0	0	477.45	332.94	20961.7	0									1.49		65.47									35600		48202
0	6795	1	hcd	370.43	4471835	263.166	971667	0	0	0	0	0	0	0	0	0	10740.2	971667	0											74.06											48202
0	6796	0	hcd	383.66	50940.2	131.145	50804.9	0	0	0	0	0	0	0	0	1119.64	1133.29	50804.9	0									2.66		117.23									32900		49002
0	6797	0	hcd	497.24	27585.1	131.145	27083.9	0	0	0	0	0	0	0	0	906.68	0	27083.9	0									2.22		65.7									32000		48402
0	6799	0	hcd	712.64	38727	131.145	38650.6	0	0	0	0	0	0	0	0	0	519.41	38650.6	0											78.48											48706
0	6800	0	hcd	538.92	66571.7	131.145	66414.5	0	0	0	0	0	0	0	0	1198.39	1600.26	66414.5	0									2.73		147.73									34500		49202
0	6801	0	hcd	546.53	52567.5	131.145	52487.3	0	0	0	0	0	0	0	0	1476.87	1121.26	52487.3	0									3.45		120.66									34200		48902
0	6802	0	hcd	479.48	36737.1	131.144	36663.6	0	0	0	0	0	0	0	0	0	670.35	36663.6	0											91.99											48802
0	6803	0	hcd	469.25	60134.1	131.145	58795	0	0	0	0	0	0	0	0	1702.67	2522.27	58795	0									4.46		149.53									33900		49202
0	6805	0	hcd	342.19	94906.7	248.187	90499.1	0	0	0	0	0	0	0	0	5457.18	2136.52	90499.1	0									16.27		257.79									46402		49302
0	6806	0	hcd	497.49	32681.6	131.145	32507.6	0	0	0	0	0	0	0	0	1175.78	718.36	32507.6	0									3.09		81.28									34600		48302
0	6807	0	hcd	750.33	15643.1	131.145	15497.6	0	0	0	0	0	0	0	0	0	0	15497.6	0											29.34											47302
0	6810	1	hcd	444.88	875739	359.028	636034	0	0	0	0	0	0	0	0	34247.4	13594	636034	0									9.42		164.91									44500		48702
0	6811	1	hcd	512.89	294949	131.145	293384	0	0	0	0	0	0	0	0	11014.5	9830.99	293384	0									13.99		358.65									45500		49602
0	6812	0	hcd	563.25	54411	131.144	54197.2	0	0	0	0	0	0	0	0	985.16	1390.17	54197.2	0									1.84		101.04									34500		48802
0	6813	0	hcd	404.44	35517.4	131.145	35516.1	0	0	0	0	0	0	0	0	1144.99	784.36	35516.1	0									3.29		98.4									33700		48602
0	6814	0	hcd	432.46	13608.6	210.95	10232.1	0	0	0	0	0	0	0	0	0	128.74	10232.1	0											26.72											47802
0	6816	0	hcd	499.64	19858.9	248.187	17807	0	0	0	0	0	0	0	0	0	257.67	17807	0											44.75											47906
0	6817	0	hcd	750.67	19282.2	131.144	19208.8	0	0	0	0	0	0	0	0	0	1174.97	19208.8	0										2.37	38.95										62400	47902
0	6818	0	hcd	583.55	23775.3	131.144	23716.9	0	0	0	0	0	0	0	0	850.13	468.29	23716.9	0									2.08		55									31000		47806
0	6819	0	hcd	751	18399.7	131.145	18234.6	0	0	0	0	0	0	0	0	0	963.55	18234.6	0										1.89	35.35										55100	47702
0	6821	0	hcd	485.71	44217.5	131.144	44209.8	0	0	0	0	0	0	0	0	1062.24	645.3	44209.8	0									2.79		115.58									34700		48602
0	6822	0	hcd	450.6	14618.6	131.144	14420.9	0	0	0	0	0	0	0	0	0	741.35	14420.9	0										1.94	37.08										53900	47902
0	6825	0	hcd	476.77	43388.7	248.187	31313.1	0	0	0	0	0	0	0	0	0	581.62	31313.1	0											77.59											48402
0	6826	0	hcd	423.91	74368	131.144	74307	0	0	0	0	0	0	0	0	1523.71	1929.57	74307	0									4.25		198.87									35700		49302
0	6827	0	hcd	351.94	19524.4	303.195	18304.2	0	0	0	0	0	0	0	0	0	939.73	18304.2	0										2.73	52.94										66100	48502
0	6829	0	hcd	702.87	16708.8	583.878	11995	0	0	0	0	0	0	0	0	0	582.46	11995	0											24.61											47002
0	6830	0	hcd	416.87	100070	337.542	60301.7	0	0	0	0	0	0	0	0	1609.01	1284.26	60301.7	0									2.99		105.66									32300		48802
0	6831	0	hcd	624.8	25771.4	505.809	19789.3	0	0	0	0	0	0	0	0	0	1281.73	19789.3	0										2.66	41.83										55800	48302
0	6834	0	hcd	759.34	71279.7	131.144	71226.1	0	0	0	0	0	0	0	0	0	1702.13	71226.1	0											132.98											48802
0	6835	0	hcd	768.83	29801.9	719.846	23481.7	0	0	0	0	0	0	0	0	862.38	1056.31	23481.7	0									1.62	2.07	44.33									31800	57200	48002
0	6838	0	hcd	498.18	13622.2	131.144	13601.4	0	0	0	0	0	0	0	0	663.41	180.24	13601.4	0									1.69		34.5									32000		47302
0	6839	0	hcd	415.54	73130.4	131.144	72906.4	0	0	0	0	0	0	0	0	1467.88	1936.38	72906.4	0									3.82		180.53									33400		49102
0	6840	0	hcd	691.95	12143.3	131.144	12140	0	0	0	0	0	0	0	0	0	752.69	12140	0										1.62	26.14										33300	46902
0	6841	0	hcd	345.57	28551.2	174.992	10944	0	0	0	0	0	0	0	0	0	295.07	10944	0											31.15											46902
0	6844	0	hcd	633.74	18084.5	370.183	8085.69	0	0	0	0	0	0	0	0	0	319.94	8085.69	0											18.29											46202
0	6845	0	hcd	826.86	19130.4	720.367	8607.74	0	0	0	0	0	0	0	0	0	488.27	8607.74	0											16.3											46002
0	6846	0	hcd	434.21	30403.5	363.221	29289.3	0	0	0	0	0	0	0	0	620.98	300.07	29289.3	0									1.72		79.4									33900		48402
0	6847	0	hcd	633.49	29311	370.183	6660.9	0	0	0	0	0	0	0	0	0	437.71	6660.9	0											14.7											45300
0	6848	0	hcd	505.24	35168.9	131.144	34685.1	0	0	0	0	0	0	0	0	0	1300.5	34685.1	0											83.44											48802
0	6850	0	hcd	447.47	198021	361.026	51860.3	0	0	0	0	0	0	0	0	1877.43	644.29	51860.3	0									4.59		126.78									35000		49002
0	6851	0	hcd	582.84	30034.5	131.145	30015.8	0	0	0	0	0	0	0	0	0	456.11	30015.8	0											70.78											48202
0	6852	0	hcd	448.75	30273.2	149.023	23935.5	0	0	0	0	0	0	0	0	0	551.82	23935.5	0											63.77											48202
0	6853	0	hcd	541.26	24791.8	131.144	24465.2	0	0	0	0	0	0	0	0	679.33	916.74	24465.2	0									1.54		55.7									33300		48702
0	6856	0	hcd	480.59	59260.2	131.145	59257.4	0	0	0	0	0	0	0	0	1151.06	1245.13	59257.4	0									3.09		155.29									32700		48902
0	6857	0	hcd	421.88	26867.3	309.917	24584.6	0	0	0	0	0	0	0	0	0	436.71	24584.6	0											68.68											48302
0	6858	0	hcd	630.58	25829	131.145	25790.4	0	0	0	0	0	0	0	0	0	1426.33	25790.4	0										3.1	55.94										62400	48102
0	6859	0	hcd	594.9	19329	285.01	7273.99	0	0	0	0	0	0	0	0	0	358.99	7273.99	0											15.74											45202
0	6862	0	hcd	618.28	23155.8	131.145	23131.9	0	0	0	0	0	0	0	0	0	1290.07	23131.9	0										2.93	52.31										65700	48302
0	6863	0	hcd	582.73	24929.9	131.144	24886.6	0	0	0	0	0	0	0	0	0	359.32	24886.6	0											57.56											48002
0	6864	0	hcd	474.74	51595.3	131.144	51595.3	0	0	0	0	0	0	0	0	1117.39	1193.16	51595.3	0									2.88		129.1									35500		49002
0	6865	0	hcd	431.72	13930.4	131.144	13649.9	0	0	0	0	0	0	0	0	0	909.88	13649.9	0										2.39	36.53										51500	48102
0	6868	0	hcd	442.53	49135.5	131.144	48944.7	0	0	0	0	0	0	0	0	770.86	1761.66	48944.7	0									2.17	4.83	131.04									33200	78500	48902
0	6869	0	hcd	559.23	17562.4	131.144	17485.2	0	0	0	0	0	0	0	0	0	161.54	17485.2	0											43.22											47902
0	6870	0	hcd	437.61	28040.3	131.145	28028.5	0	0	0	0	0	0	0	0	662.15	580.44	28028.5	0									1.8		75.31									33600		48202
0	6871	0	hcd	423.42	33015.4	131.144	32958.6	0	0	0	0	0	0	0	0	941.45	623.44	32958.6	0									2.69		91.88									34500		48302
0	6872	0	hcd	463.46	97487.9	131.145	97090.3	0	0	0	0	0	0	0	0	2335.11	3239.87	97090.3	0									5.35		213.29									36200		49302
0	6875	0	hcd	396.22	49398.1	131.144	49232.5	0	0	0	0	0	0	0	0	1514.77	1557.47	49232.5	0									4.07	4.36	131.09									32900	74200	48902
0	6876	0	hcd	337.43	19941	131.144	19658.2	0	0	0	0	0	0	0	0	0	715.58	19658.2	0											58.29											48502
0	6879	1	hcd	512.22	64971.5	131.144	64952.9	0	0	0	0	0	0	0	0	1290.05	1412.45	64952.9	0									2.97		145.47									34800		49102
0	6880	0	hcd	605.25	14091.5	131.144	14085.1	0	0	0	0	0	0	0	0	0	170.83	14085.1	0											31.62											47402
0	6881	0	hcd	658.81	13850.9	131.144	13679.1	0	0	0	0	0	0	0	0	0	253.65	13679.1	0											28.45											47302
0	6883	0	hcd	459.01	70821.3	131.144	70573	0	0	0	0	0	0	0	0	1007.82	1261.39	70573	0									2.38		165.08									32800		48902
0	6886	0	hcd	424.54	26011	131.144	25662.2	0	0	0	0	0	0	0	0	0	300.17	25662.2	0											68.54											48702
0	6889	0	hcd	780.99	1913.91	131.144	1902.53	0	0	0	0	0	0	0	0	0	0	1902.53	0											3.74											35700
0	6890	0	hcd	404.75	14704.7	131.145	14704.7	0	0	0	0	0	0	0	0	821.04	250.83	14704.7	0									2.23		39.78									33300		48102
0	6891	0	hcd	314.2	24787	242.092	16604.3	0	0	0	0	0	0	0	0	0	551.53	16604.3	0											50.43											48602
0	6894	1	hcd	465.87	61284.7	131.144	61283.4	0	0	0	0	0	0	0	0	3115.63	1235.27	61283.4	0									8.89		160.59									50900		48902
0	6895	0	hcd	584.01	20958.6	131.144	20849.1	0	0	0	0	0	0	0	0	605.74	1326.35	20849.1	0									1.42	3.1	48.74									35700	59600	48202
0	6896	0	hcd	321.55	83642.4	131.144	83620.4	0	0	0	0	0	0	0	0	1464.41	1901.3	83620.4	0									4.65		256.14									32800		49106
0	6897	0	hcd	515.96	17755.8	131.144	17702.3	0	0	0	0	0	0	0	0	0	305.22	17702.3	0											42.04											48202
0	6898	0	hcd	441.39	26719.5	131.144	26483.6	0	0	0	0	0	0	0	0	890.31	803.36	26483.6	0									2.31		66.98									35200		48502
0	6900	0	hcd	427.59	30337.9	131.144	30167.2	0	0	0	0	0	0	0	0	832.57	210.56	30167.2	0									2.2		77.4									33200		48402
0	6903	0	hcd	476.94	47093.3	131.144	47078.8	0	0	0	0	0	0	0	0	993.71	655.61	47078.8	0									2.64		119.23									32400		48502
0	6904	0	hcd	499.19	28884.9	131.144	28786.5	0	0	0	0	0	0	0	0	0	449.71	28786.5	0											71.99											48802
0	6905	0	hcd	662.02	11938.4	131.144	11937.6	0	0	0	0	0	0	0	0	0	0	11937.6	0											26.18											47302
0	6906	0	hcd	728.67	6874.25	471.299	5933.75	0	0	0	0	0	0	0	0	0	0	5933.75	0											11.28											44100
0	6909	0	hcd	505.68	27268.3	131.144	27195.5	0	0	0	0	0	0	0	0	0	460.61	27195.5	0											66.85											48306
0	6910	0	hcd	491.24	38807.8	131.144	38474.7	0	0	0	0	0	0	0	0	1125.37	1002.98	38474.7	0									2.7		89.35									34300		48502
0	6912	0	hcd	524.24	15968.3	131.144	15849.4	0	0	0	0	0	0	0	0	0	177.53	15849.4	0											38.91											48302
0	6913	0	hcd	530.22	14086.4	451.637	11893.1	0	0	0	0	0	0	0	0	0	241.81	11893.1	0											28.77											47202
0	6916	0	hcd	440.55	47197.8	131.144	47148.6	0	0	0	0	0	0	0	0	1347.51	598.69	47148.6	0									3.84		126.59									33500		48702
0	6917	0	hcd	580.58	64822.8	320.68	13828.1	0	0	0	0	0	0	0	0	0	344.44	13828.1	0											31.22											47302
0	6918	0	hcd	435.87	61288.7	131.144	61238.6	0	0	0	0	0	0	0	0	1631.53	1446.63	61238.6	0									4.41		159.87									34600		49302
0	6919	0	hcd	506.23	20704.9	729.363	15147.7	0	0	0	0	0	0	0	0	0	911.79	15147.7	0										2.16	36.18										61200	48202
0	6920	0	hcd	554.73	4135.76	131.144	4069.49	0	0	0	0	0	0	0	0	0	0	4069.49	0											9.47											43700
0	6922	0	hcd	364.54	28153.8	131.144	28005.9	0	0	0	0	0	0	0	0	583.93	553.51	28005.9	0									1.81		82.84									33000		48902
0	6923	0	hcd	543.91	13689.2	131.144	13566.7	0	0	0	0	0	0	0	0	0	169.17	13566.7	0											30.78											47202
0	6924	0	hcd	536.73	132255	299.062	32130.5	0	0	0	0	0	0	0	0	1191.76	707.75	32130.5	0									2.88		73.62									33300		48502
0	6925	0	hcd	671.29	17570.5	131.144	17205.7	0	0	0	0	0	0	0	0	0	821.79	17205.7	0										1.86	35.74										48600	47902
0	6928	0	hcd	399.55	13353.9	131.145	13312.7	0	0	0	0	0	0	0	0	0	276.8	13312.7	0											38.26											47302
0	6929	0	hcd	422.56	18771.9	305.664	16259.4	0	0	0	0	0	0	0	0	0	201.02	16259.4	0											44.76											48102
0	6930	0	hcd	439.71	36635.3	328.686	31071.2	0	0	0	0	0	0	0	0	732.02	356.05	31071.2	0									1.93		78.39									32700		48202
0	6931	0	hcd	365.7	35798.8	131.144	35448.1	0	0	0	0	0	0	0	0	589.17	1106.36	35448.1	0									1.6		95.7									36000		49002
0	6933	0	hcd	493.57	552941	414.248	504935	0	0	0	0	0	0	0	0	12178.8	9598.52	504935	0									3.91		156.18									30000		48702
0	6934	0	hcd	715.64	14781.4	131.144	14741.7	0	0	0	0	0	0	0	0	0	142.48	14741.7	0											28.64											47402
0	6935	0	hcd	815.22	18407.9	355.07	1357.78	0	0	0	0	0	0	0	0	0	0	1357.78	0											2.33											34500
0	6938	0	hcd	463.74	220733	131.144	220697	0	0	0	0	0	0	0	0	4676.42	5403.05	220697	0									5.44		247.56									36700		49202
0	6939	0	hcd	603.01	20258.2	131.144	20250.8	0	0	0	0	0	0	0	0	0	258.16	20250.8	0											45.76											47502
0	6940	0	hcd	671.96	15325.4	131.145	15130.6	0	0	0	0	0	0	0	0	0	380.24	15130.6	0											32.27											46602
0	6942	0	hcd	534.23	142353	248.187	133682	0	0	0	0	0	0	0	0	5105.47	3133.83	133682	0									9.42		242.15									48700		49302
0	6943	0	hcd	596.05	230991	248.187	112682	0	0	0	0	0	0	0	0	5374.54	2850.76	112682	0									11.74		230.66									45500		49202
0	6946	0	hcd	477.04	771512	248.187	278326	0	0	0	0	0	0	0	769.43	13449.7	6810.81	278326	0									14.35		284									45600		48902
0	6947	0	hcd	670.95	19066.9	131.144	19064.8	0	0	0	0	0	0	0	0	873.43	307.18	19064.8	0									1.89		40.91									33100		47902
0	6948	0	hcd	418.89	270670	380.556	249895	0	0	0	0	0	0	0	0	8024.55	5509.35	249895	0									8.83		266.35									49000		49102
0	6949	0	hcd	486.74	442455	304.685	351227	0	0	0	0	0	0	0	0	11167.7	8089.02	351227	0									9.68		283.66									53600		49002
0	6950	0	hcd	560.91	26527.5	131.144	26373.3	0	0	0	0	0	0	0	0	903.09	728.38	26373.3	0									2.17		61.28									30400		48702
0	6952	0	hcd	651.79	31734.1	571.296	28443	0	0	0	0	0	0	0	0	616.55	642.73	28443	0									1.36		63.13									33800		48402
0	6953	0	hcd	862.71	5291.18	138.055	1747.42	0	0	0	0	0	0	0	0	0	0	1747.42	0											3.08											33200
0	6954	0	hcd	407.55	26574.2	131.144	26316.5	0	0	0	0	0	0	0	0	1023.71	556.53	26316.5	0									3.05		76.6									32300		48502
0	6955	0	hcd	794.39	44182.1	248.187	31613.2	0	0	0	0	0	0	0	0	0	1031.31	31613.2	0											57.86											48102
0	6957	0	hcd	653.31	19627.2	131.144	19528.9	0	0	0	0	0	0	0	0	0	44.07	19528.9	0											41.23											47802
0	6958	0	hcd	399.92	22264	131.145	22183.4	0	0	0	0	0	0	0	0	0	475.24	22183.4	0											61.95											48602
0	6959	0	hcd	346.69	60009.5	131.144	59241.7	0	0	0	0	0	0	0	0	1412.18	2058.24	59241.7	0									4.08		168.28									33100		49102
0	6962	0	hcd	345.99	58635.2	131.145	58539.1	0	0	0	0	0	0	0	0	3246.77	1246.89	58539.1	0									9.68		169.61									50200		49002
0	6963	0	hcd	411.54	35954.7	131.144	35660.1	0	0	0	0	0	0	0	0	0	885.18	35660.1	0											94.29											48802
0	6964	0	hcd	522.48	31310.1	131.144	31170.9	0	0	0	0	0	0	0	0	1331.81	569.21	31170.9	0									3.24		75.09									34300		48402
0	6965	0	hcd	729.01	10369.6	131.144	10198.6	0	0	0	0	0	0	0	0	0	596.95	10198.6	0											20.82											46602
0	6968	0	hcd	432.23	91628.3	131.144	91599	0	0	0	0	0	0	0	0	1945.62	1107.5	91599	0									5.07		230.61									36200		49202
0	6969	0	hcd	521.74	39456.7	299.062	26376.6	0	0	0	0	0	0	0	0	587.32	477.53	26376.6	0									1.41		62.18									32700		48402
0	6970	1	hcd	573.28	230304	540.625	186886	0	0	0	0	0	0	0	0	7615.96	5350.61	186886	0									11.91		273.75									45000		49502
0	6971	0	hcd	335.19	43451.4	149.023	13770.9	0	0	0	0	0	0	0	0	494.23	211.37	13770.9	0									1.55		42.83									29800		48202
0	6972	0	hcd	576.31	19160.3	131.144	18869.5	0	0	0	0	0	0	0	0	0	880.05	18869.5	0										2.08	42.91										60200	48302
0	6975	0	hcd	683.3	42006.3	585.324	28936.5	0	0	0	0	0	0	0	0	0	599.21	28936.5	0											59.95											48102
0	6976	0	hcd	552.24	17621.5	131.144	17509.3	0	0	0	0	0	0	0	0	653.54	1053.34	17509.3	0									1.69	2.56	42.8									35700	62700	48302
0	6977	0	hcd	648.65	74841.6	131.144	73969.2	0	0	0	0	0	0	0	0	1596	2708.12	73969.2	0									3.25		148.45									33700		49302
0	6980	0	hcd	569.26	431396	131.144	429599	0	0	0	0	0	0	0	0	15276.9	11905.9	429599	0									9.98		265.47									45200		49402
0	6981	1	hcd	430.47	80402.3	486.24	49241.4	0	0	0	0	0	0	0	0	704.04	1301.32	49241.4	0									1.79		118.83									33600		48802
0	6982	0	hcd	342.21	192000	248.187	109688	0	0	0	0	0	0	0	0	3399.37	3148.83	109688	0									10.25		311.03									45200		49502
0	6983	0	hcd	505.93	15453.2	131.144	15290.9	0	0	0	0	0	0	0	0	0	235.94	15290.9	0											35.98											47402
0	6989	0	hcd	350.86	9786.55	381.199	7948.62	0	0	0	0	0	0	0	0	0	0	7948.62	0											23.33											47302
0	6990	0	hcd	552.91	13568.7	131.145	13532.2	0	0	0	0	0	0	0	0	0	128.3	13532.2	0											33.14											47402
0	6991	0	hcd	860.42	13137.4	811.43	8062.04	0	0	0	0	0	0	0	0	0	451.33	8062.04	0											13.69											45102
0	6993	0	hcd	455.61	754677	390.551	526627	0	0	0	0	0	0	0	0	27503	8397.56	526627	0									9.49		172.95									49500		48902
0	6994	0	hcd	859.42	32882.4	810.434	17556.2	0	0	0	0	0	0	0	0	0	503.04	17556.2	0											30.35											47402
0	6997	0	hcd	643.31	57545.9	131.144	57274	0	0	0	0	0	0	0	0	0	1451.67	57274	0											121.4											49102
0	6998	0	hcd	416.88	22638.2	143.118	21586.7	0	0	0	0	0	0	0	0	0	481.8	21586.7	0											57.41											48602
0	6999	0	hcd	656.27	26481.2	607.281	7339.79	0	0	0	0	0	0	0	0	0	509.74	7339.79	0											15.27											45802
0	7000	0	hcd	488.71	25957.5	131.144	25675.2	0	0	0	0	0	0	0	0	0	827.14	25675.2	0										2.08	61.02										71700	48602
0	7002	0	hcd	546.51	140654	468.767	107527	0	0	0	0	0	0	0	0	3832.02	2557.46	107527	0									3.38		89.31									32600		48402
0	7003	0	hcd	647.28	86553.4	131.144	86531.8	0	0	0	0	0	0	0	0	2444.84	1742.89	86531.8	0									5.02		174.51									34600		49102
0	7004	0	hcd	509.19	15106.7	131.144	15099	0	0	0	0	0	0	0	0	0	174.11	15099	0											38.75											47402
0	7005	0	hcd	332.86	51684.9	131.145	51649.5	0	0	0	0	0	0	0	0	946.38	1088.59	51649.5	0									2.92		153.98									35000		48802
0	7006	0	hcd	559.94	38983.6	131.145	38525.9	0	0	0	0	0	0	0	0	1034.27	1461.01	38525.9	0									2.21		83.07									35200		48602
0	7009	0	hcd	638.63	644482	131.144	644031	0	0	0	0	0	0	0	0	13801	11954.9	644031	0									3.76		173.84									33500		48902
0	7010	0	hcd	393.55	152881	346.886	144759	0	0	0	0	0	0	0	0	3346.96	3752.5	144759	0									5.08		208.24									35400		48906
0	7011	0	hcd	540.95	19984.1	131.144	19672.3	0	0	0	0	0	0	0	0	0	976.67	19672.3	0										2.23	45.21										64400	48202
0	7015	0	hcd	549.59	9699.75	239.095	8386.14	0	0	0	0	0	0	0	0	0	428.14	8386.14	0											20.28											46302
0	7018	0	hcd	471.73	49265.2	131.145	49157.3	0	0	0	0	0	0	0	0	1177.02	1021.26	49157.3	0									2.38		95.83									33200		48602
0	7019	0	hcd	425.71	18594.3	312.911	17697.3	0	0	0	0	0	0	0	0	0	911.59	17697.3	0										2.39	45.77										62100	48102
0	7020	0	hcd	382.48	19955.7	131.145	19880.7	0	0	0	0	0	0	0	0	906.66	308.57	19880.7	0									2.81		59.03									34300		47902
0	7021	0	hcd	450.54	49579.6	131.145	49383.3	0	0	0	0	0	0	0	0	996.19	1183.91	49383.3	0									2.68		130.16									32400		48802
0	7022	0	hcd	402.18	53058.4	225.043	17473.3	0	0	0	0	0	0	0	0	646.65	1029.17	17473.3	0									1.73	2.68	45.84									33900	62400	48302
0	7024	0	hcd	562.28	15569.9	131.145	15489.1	0	0	0	0	0	0	0	0	0	975.57	15489.1	0										2.33	37.16										56800	48102
0	7025	0	hcd	619.26	11933.8	553.939	5502.39	0	0	0	0	0	0	0	0	0	0	5502.39	0											12											44600
0	7026	0	hcd	564.26	17559.9	131.145	17359.3	0	0	0	0	0	0	0	0	0	373.58	17359.3	0											38.96											47802
0	7029	0	hcd	588.33	26335.2	131.144	26304.9	0	0	0	0	0	0	0	0	0	540.38	26304.9	0											60.14											48302
0	7030	0	hcd	362.22	37806	131.144	37764.1	515.06	0	0	0	0	0	0	0	903.87	1265.55	37764.1	0	1.58								2.78	3.89	112.89	36200								35000	79200	48602
0	7031	0	hcd	455.87	1.40712e+06	131.145	1.40585e+06	0	0	0	0	0	0	0	0	40383	37498.1	1.40585e+06	0									5.51		182.67									35100		49202
0	7032	0	hcd	347.53	39021.7	131.144	39002.6	0	0	0	0	0	0	0	0	837.89	795.97	39002.6	0									2.64		118.71									33400		48802
0	7033	0	hcd	702.28	7403.17	247.203	6112.82	0	0	0	0	0	0	0	0	0	0	6112.82	0											12.03											44600
0	7036	1	hcd	635.91	21632.4	131.145	21587.4	0	0	0	0	0	0	0	0	796.21	1076.55	21587.4	0									1.8	2.35	46.64									33100	68100	47902
0	7037	0	hcd	340.88	1211646	131.144	1.20357e+06	0	0	0	0	0	0	0	0	54262	16167.8	1.20357e+06	0									22.16		484.3									47602		49402
0	7038	0	hcd	385.52	93787.4	225.043	51950.2	0	0	0	0	0	0	0	0	1637.25	1742.14	51950.2	0									4.51		141.67									34400		49102
0	7039	0	hcd	577.78	48082.5	131.144	47252.4	0	0	0	0	0	0	0	0	1217.11	1898.89	47252.4	0									2.88	3.76	107.36									34000	68200	49002
0	7041	0	hcd	539.86	21403.9	382.725	17246.9	0	0	0	0	0	0	0	0	0	830.54	17246.9	0										2.08	43.03										63300	47906
0	7042	0	hcd	675.8	23571.8	577.826	19045.5	0	0	0	0	0	0	0	0	0	366.29	19045.5	0											40.82											47602
0	7043	0	hcd	364.51	29079	131.145	28571.2	0	0	0	0	0	0	0	0	0	951.92	28571.2	0											77.4											48702
0	7045	0	hcd	482.73	87226	472.288	85257.6	0	0	0	0	0	0	0	0	3416.41	1607.77	85257.6	0									5.38		128.37									34700		48602
0	7046	0	hcd	628.63	40493.5	131.144	40060	0	0	0	0	0	0	0	0	0	1044.73	40060	0											83.31											48702
0	7049	0	hcd	699.97	11751.5	131.144	11654.9	0	0	0	0	0	0	0	0	0	602.53	11654.9	0											24.68											46502
0	7050	0	hcd	525.23	17089.8	131.144	17084.6	0	0	0	0	0	0	0	0	0	69.28	17084.6	0											42.47											48302
0	7051	0	hcd	489.27	59802.1	131.144	59614.2	0	0	0	0	0	0	0	0	1000.01	1547.46	59614.2	0									2.56		145.54									32800		49002
0	7052	0	hcd	515.24	21860.7	131.145	21860.7	0	0	0	0	0	0	0	0	978.94	1222.38	21860.7	0									2.51	3.05	54.59									34300	67400	48202
0	7053	0	hcd	694.79	7273.92	131.144	7037.83	0	0	0	0	0	0	0	0	0	0	7037.83	0											13.89											45002
0	7055	0	hcd	359.87	30745.2	131.144	30668.5	0	0	0	0	0	0	0	0	0	433.03	30668.5	0											93.93											48702
0	7056	0	hcd	529.26	24354.6	131.144	24273.8	0	0	0	0	0	0	0	0	0	530.29	24273.8	0											58.47											48302
0	7057	0	hcd	399.47	41875.1	131.144	41575.9	0	0	0	0	0	0	0	0	807.5	766.7	41575.9	0									2.35		115.22									34700		48602
0	7058	0	hcd	524.76	15835.8	131.144	15562.3	0	0	0	0	0	0	0	0	0	804.54	15562.3	0										1.9	36.46										57900	48002
0	7061	0	hcd	415.9	32512.1	131.144	32385.6	0	0	0	0	0	0	0	0	1058.75	737.6	32385.6	0									3.05		89.05									33800		48802
0	7062	0	hcd	613.61	27715.3	580.95	6271.55	0	0	0	0	0	0	0	0	0	355.12	6271.55	0											14.45											45100
0	7063	0	hcd	432.89	34263.8	131.144	33884.5	0	0	0	0	0	0	0	0	0	1122.41	33884.5	0										3.05	88.1										73900	48802
0	7066	0	hcd	326.51	930355	293.856	497079	0	0	0	0	0	0	0	0	9729.83	14841.4	497079	0									5.39		270.14									36100		49302
0	7067	0	hcd	359.18	18722	131.145	18596.4	0	0	0	0	0	0	0	0	691.92	919.03	18596.4	0									2.01	2.65	52.58									33600	61600	48302
0	7069	0	hcd	447.35	229098	361.025	20676.9	0	0	0	0	0	0	0	0	0	208.25	20676.9	0											48.9											48002
0	7070	1	hcd	541.49	75046.8	499.25	66185.8	0	0	0	0	0	0	0	0	1082.36	1318.91	66185.8	0									2.42		142.72									34000		49102
0	7071	0	hcd	740.36	20498.5	131.144	20426.3	0	0	0	0	0	0	0	0	0	1197.69	20426.3	0										2.35	40.16										63100	47902
0	7072	0	hcd	403.38	19950.7	185.081	15857.8	0	0	0	0	0	0	0	0	0	865.87	15857.8	0										2.41	43.68										63300	47906
0	7073	0	hcd	721.31	20903.2	131.144	20660.5	0	0	0	0	0	0	0	0	805.15	457.87	20660.5	0									1.56		38.34									34300		47802
0	7076	0	hcd	452.43	104651	131.144	104499	0	0	0	0	0	0	0	0	4393.19	2021.16	104499	0									10.96		258.09									44400		49302
0	7077	0	hcd	565.29	25719.9	131.144	25685.3	0	0	0	0	0	0	0	0	1301.2	524.57	25685.3	0									3.01		57.67									33600		48302
0	7078	0	hcd	364.86	34142.5	131.144	33760.2	0	0	0	0	0	0	0	0	904.03	998.69	33760.2	0									2.62		95.89									34700		48802
0	7079	0	hcd	1198.42	29414.6	176.092	0	0	0	0	0	0	0	0	0	0	0	0	0
0	7082	0	hcd	503.97	240594	131.144	240590	0	0	0	0	0	0	0	0	5727.6	5529.33	240590	0									4.45		185.97									35100		48802
0	7083	0	hcd	527.25	11554.4	131.144	11543.8	0	0	0	0	0	0	0	0	0	99.57	11543.8	0											28.36											47002
0	7084	0	hcd	329.57	726146	131.144	720955	0	0	0	0	0	0	0	600.12	29277.8	9293.84	720955	0									27.45		665.07									47902		49502
0	7087	0	hcd	480.5	83939.3	131.144	83909.9	0	0	0	0	0	0	0	0	3444.63	1758.66	83909.9	0									8.21		197.91									48900		49202
0	7088	0	hcd	651.04	12651.9	131.144	12644.4	0	0	0	0	0	0	0	0	0	766.21	12644.4	0										1.71	27.89										43300	47302
0	7089	0	hcd	506.47	20758.1	131.145	20754.5	0	0	0	0	0	0	0	0	0	1137.29	20754.5	0										2.84	51.87										65100	47702
0	7090	0	hcd	1069.89	17124.6	176.092	0	0	0	0	0	0	0	0	0	0	0	0	0
0	7093	1	hcd	433.39	47869.2	391.212	23303.8	0	0	0	0	0	0	0	0	0	1126.86	23303.8	0										3.02	62.38										72600	47902
0	7094	0	hcd	440.23	19883.2	131.145	19772.4	0	0	0	0	0	0	0	0	0	928.16	19772.4	0										2.44	51.82										65400	48002
0	7097	0	hcd	426.2	111777	346.873	67170.7	0	0	0	0	0	0	0	0	1855.47	1151.6	67170.7	0									4.79		171.6									34900		49002
0	7098	0	hcd	465.5	19642.7	131.144	19613.8	0	0	0	0	0	0	0	0	700.4	179.85	19613.8	0									1.94		54.05									32300		47702
0	7099	0	hcd	384.6	87537.6	311.693	42354.3	0	0	0	0	0	0	0	0	496.66	999	42354.3	0									1.34		112.55									36100		48902
0	7100	0	hcd	473.19	35658.7	360.914	31714.9	0	0	0	0	0	0	0	0	779.33	867.74	31714.9	0									1.83		73.67									34500		48602
0	7102	0	hcd	712.3	16049.3	131.145	16043.7	0	0	0	0	0	0	0	0	0	63.27	16043.7	0											32.23											46902
0	7103	0	hcd	404.79	52197.5	131.145	51808.2	0	0	0	0	0	0	0	0	1408.47	1931.46	51808.2	0									3.71		133.05									33500		49002
0	7106	0	hcd	514.57	42797	131.144	42766.7	0	0	0	0	0	0	0	0	661.39	897.44	42766.7	0									1.65		105.97									34700		48602
0	7107	0	hcd	553.94	16048.2	131.145	15921	0	0	0	0	0	0	0	0	0	672.16	15921	0										1.6	37.08										59900	47802
0	7109	0	hcd	435.71	53857.2	131.144	53807.9	0	0	0	0	0	0	0	0	1282.94	782.69	53807.9	0									3.67		144.49									32900		49002
0	7110	0	hcd	501.25	51820.9	131.144	51814.2	0	0	0	0	0	0	0	0	1552.89	1013.77	51814.2	0									3.92		127.3									31700		48502
0	7111	0	hcd	405.19	26397.5	131.145	26397.5	0	0	0	0	0	0	0	0	466.15	790.4	26397.5	0									1.31		73.21									32600		48502
0	7113	0	hcd	550.9	13516.7	131.144	13492.2	0	0	0	0	0	0	0	0	0	220.25	13492.2	0											31.26											46902
0	7114	0	hcd	495.96	16730.4	131.144	16681.6	0	0	0	0	0	0	0	0	0	353.53	16681.6	0											43.63											47702
0	7115	0	hcd	488.74	66229.8	131.144	66173.5	0	0	0	0	0	0	0	0	1317.43	1457.98	66173.5	0									3.37		160.19									33100		49202
0	7116	0	hcd	589.82	42678.1	519.825	23110.2	0	0	0	0	0	0	0	0	0	740.06	23110.2	0											51.75											48602
0	7118	0	hcd	499.39	19196.6	131.144	19186.3	0	0	0	0	0	0	0	0	0	273.48	19186.3	0											45.01											48202
0	7119	0	hcd	380.87	24111.7	131.144	24109.7	0	0	0	0	0	0	0	0	940.5	849.02	24109.7	0									2.79	2.41	66.98									33400	72500	48402
0	7120	0	hcd	459.43	79560.4	131.144	79338.2	0	0	0	0	0	0	0	0	1813.74	2244.4	79338.2	0									4.47		190.17									33800		49002
0	7122	0	hcd	580.95	21300.3	131.144	21299.5	0	0	0	0	0	0	0	0	0	361.47	21299.5	0											51.96											48002
0	7123	0	hcd	605.84	6559.7	131.144	6494.34	0	0	0	0	0	0	0	0	0	220.12	6494.34	0											14.89											44402
0	7124	0	hcd	506.24	20629.2	131.144	20593.5	0	0	0	0	0	0	0	0	0	314.63	20593.5	0											50.92											48102
0	7125	0	hcd	867.72	7415.46	769.4	5903.2	0	0	0	0	0	0	0	0	0	0	5903.2	0											10.57											43600
0	7126	0	hcd	410.86	34107	131.144	33963.3	0	0	0	0	0	0	0	0	1042.19	925.49	33963.3	0									2.89		90.28									31500		48602
0	7129	0	hcd	653.79	31271.2	572.802	16519.7	0	0	0	0	0	0	0	0	0	186.31	16519.7	0											35.94											47602
0	7130	0	hcd	404.88	55969.5	131.144	55964.6	0	0	0	0	0	0	0	0	1687.24	1053.13	55964.6	0									4.75		152.55									35600		48702
0	7131	0	hcd	397.53	48297.3	131.144	48122.3	0	0	0	0	0	0	0	0	1069.57	1433.94	48122.3	0									2.98		132.8									34400		48902
0	7132	0	hcd	650.79	190179	577.553	149253	0	0	0	0	0	0	0	0	5785.42	3789.43	149253	0									10		241.92									45300		49202
0	7135	0	hcd	758.67	17628.8	131.144	17480.6	0	0	0	0	0	0	0	0	0	31.52	17480.6	0											34.62											47402
0	7136	0	hcd	351.71	20799.5	131.144	20719.6	0	0	0	0	0	0	0	0	513.4	501.2	20719.6	0									1.54		62.26									35300		48602
0	7137	0	hcd	499.01	43542.6	131.144	43159.2	0	0	0	0	0	0	0	0	972.76	1347.32	43159.2	0									2.31		101.37									34900		48702
0	7139	0	hcd	640.67	29924.9	131.144	29786.4	0	0	0	0	0	0	0	0	680.07	663.14	29786.4	0									1.53		63.02									34000		48402
0	7140	1	hcd	627.31	76811.5	131.144	75406.9	0	0	0	0	0	0	0	0	0	3295.95	75406.9	0											156.94											49302
0	7143	0	hcd	397.46	45772.4	248.187	43637.5	0	0	0	0	0	0	0	0	1486.24	889.67	43637.5	0									4.34		123.78									34700		48902
0	7144	0	hcd	437.38	32254.2	131.144	32117.8	0	0	0	0	0	0	0	0	1241.55	673.19	32117.8	0									3.5		87.68									33500		48602
0	7145	0	hcd	752.02	5523.47	131.144	5435.25	0	0	0	0	0	0	0	0	0	0	5435.25	0											10.08											43600
0	7148	0	hcd	451.61	48175.8	393.025	42813.1	0	0	0	0	0	0	0	0	1347.66	1076.46	42813.1	0									3.56		110.48									34300		48702
0	7149	0	hcd	660.77	5339.92	131.144	5172.26	0	0	0	0	0	0	0	0	0	0	5172.26	0											11.6											46000
0	7150	0	hcd	670.52	15291.3	766.663	5113.62	0	0	0	0	0	0	0	0	0	0	5113.62	0											10.72											43300
0	7153	0	hcd	582.5	19570.1	131.144	19468.6	0	0	0	0	0	0	0	0	0	393.61	19468.6	0											44.92											48102
0	7154	0	hcd	399.58	137884	131.144	137631	0	0	0	0	0	0	0	281.83	4651.83	4007.73	137631	0									13.6		377.05									45600		49402
0	7155	0	hcd	403.22	22474.3	131.144	22285.6	0	0	0	0	0	0	0	0	0	609.27	22285.6	0											58.28											48502
0	7158	1	hcd	630.25	69598.6	538.276	37980.7	0	0	0	0	0	0	0	0	1291.71	579.97	37980.7	0									2.79		77.55									33200		48402
0	7159	0	hcd	300.19	597437	230.176	219143	0	0	0	0	0	0	0	530.32	7328.44	2872.22	219143	0								1.29	17.95		530.58								18300	45902		49402
0	7160	0	hcd	529.58	31912.2	131.145	31494.8	0	0	0	0	0	0	0	0	0	931.58	31494.8	0											71.34											48802
0	7163	0	hcd	376.19	41734.3	131.145	41627.1	0	0	0	0	0	0	0	0	1619.43	993.24	41627.1	0									4.58		115.94									34700		49002
0	7164	0	hcd	404.72	74599	131.145	74583.3	0	0	0	0	0	0	0	0	4058.23	1642.51	74583.3	0									10.67		192.88									45000		49102
0	7165	0	hcd	558.35	11087.9	131.145	11043.5	0	0	0	0	0	0	0	0	0	655.66	11043.5	0										1.62	27.05										32400	47202
0	7166	0	hcd	588.17	28138.7	517.827	22077.2	0	0	0	0	0	0	0	0	677.09	1160.1	22077.2	0									1.46	2.56	47.97									36500	61100	48202
0	7169	0	hcd	396.97	28182.5	131.144	28182	0	0	0	0	0	0	0	0	0	523.86	28182	0											81.23											48602
0	7170	1	hcd	464.89	36681.3	131.144	36586.8	0	0	0	0	0	0	0	0	0	1352.87	36586.8	0										3.53	95.41										75600	48602
0	7171	0	hcd	366.89	40733.2	131.144	40430.5	0	0	0	0	0	0	0	0	1181.95	1478	40430.5	0									3.49	4.32	117.52									34300	75800	49102
0	7172	0	hcd	661.28	6283	131.144	6230.85	0	0	0	0	0	0	0	0	0	0	6230.85	0											12.98											44700
0	7175	0	hcd	616.29	14970.7	131.144	14809.6	0	0	0	0	0	0	0	0	0	386	14809.6	0											33.88											47402
0	7176	0	hcd	467.21	24443.9	131.144	24238.4	0	0	0	0	0	0	0	0	673.62	804.29	24238.4	0									1.7		60.07									31900		48702
0	7179	0	hcd	512.21	34034.9	131.144	33841.5	0	0	0	0	0	0	0	0	783.79	1283.2	33841.5	0									1.91	3.08	81.28									31400	73300	48802
0	7180	0	hcd	462.47	369763	359.028	94589.9	0	0	0	0	0	0	0	0	2397.74	2746.61	94589.9	0									5.35		200.48									35700		49002
0	7181	0	hcd	363.21	120258	363.214	78894.3	0	0	0	0	0	0	0	0	0	2385.37	78894.3	0											226.89											49202
0	7183	0	hcd	458.81	41676.7	131.144	41242.9	0	0	0	0	0	0	0	0	0	709.55	41242.9	0											102.19											49002
0	7186	0	hcd	964.46	15086.4	845.467	8195.83	0	0	0	0	0	0	0	0	0	373.92	8195.83	0											13.38											44000
0	7187	0	hcd	622.28	9590.31	248.186	7551.9	0	0	0	0	0	0	0	0	0	0	7551.9	0											15.95											45502
0	7191	0	hcd	656.29	8684.43	131.144	8588.31	0	0	0	0	0	0	0	0	0	0	8588.31	0											18.43											46502
0	7192	0	hcd	650.97	36962.3	131.144	36557	0	0	0	0	0	0	0	0	0	1234.01	36557	0											73.17											48702
0	7195	0	hcd	488.48	45088.2	131.145	45071.9	0	0	0	0	0	0	0	0	978.2	835.67	45071.9	0									2.56		112.01									33000		48902
0	7196	0	hcd	543.25	80743.9	131.145	80557.4	0	0	0	0	0	0	0	0	1836.77	2635.69	80557.4	0									4.05		172.42									34000		49202
0	7199	0	hcd	504.25	47018.3	131.145	46863.9	0	0	0	0	0	0	0	0	1406.4	1023.09	46863.9	0									3.56		113.47									33700		48902
0	7200	0	hcd	410.57	47848.1	131.145	47589.6	0	0	0	0	0	0	0	0	1799.2	1307	47589.6	0									5.05		130.7									34800		49002
0	7201	0	hcd	427.59	29933	203.128	25400.5	0	0	0	0	0	0	0	0	0	823.49	25400.5	0											66.9											48902
0	7204	1	hcd	499.25	1.00952e+06	272.172	628905	0	0	0	0	0	0	0	0	23316.6	17263.3	628905	0									13.85		354.03									45900		49102
0	7205	0	hcd	416.75	40097.5	472.288	26668.3	0	0	0	0	0	0	0	0	0	469.72	26668.3	0											70.72											48202
0	7206	0	hcd	400.56	98854.8	131.145	98260.1	0	0	0	0	0	0	0	0	2706.42	3464.02	98260.1	0									7.3		263.76									46500		49406
0	7208	1	hcd	527.67	18158.1	597.31	10553.9	0	0	0	0	0	0	0	0	918.52	535.42	10553.9	0									2.35		25.44									34700		46502
0	7209	1	hcd	748.37	43278.1	699.379	21253.7	0	0	0	0	0	0	0	0	0	713.19	21253.7	0										1.44	38.96										58800	47802
0	7213	1	hcd	374.69	157734	272.172	54524.1	0	0	0	0	0	0	0	0	0	563.55	54524.1	0											51.57											48002
0	7214	1	hcd	531.26	36617.9	498.599	32511.4	0	0	0	0	0	0	0	0	678.41	584.12	32511.4	0									1.68		76.81									34400		48502
0	7215	0	hcd	466.73	37017.2	175.119	30451.4	0	0	0	0	0	0	0	0	0	383.24	30451.4	0											72.71											48502
0	7216	0	hcd	308.18	25079.7	131.144	24688.6	0	0	0	0	0	0	0	0	0	769.29	24688.6	0											74.59											48502
0	7219	0	hcd	366.54	55652.3	131.145	55507.7	0	0	0	0	0	0	0	0	1746.89	1230.84	55507.7	0									5.24		161.41									34500		49102
0	7220	0	hcd	621.97	13655.6	583.63	6649.76	0	0	0	0	0	0	0	0	0	0	6649.76	0											14.66											45402
0	7221	0	hcd	450.57	96795.6	131.145	96773.6	0	0	0	0	0	0	0	0	2640.94	2228.08	96773.6	0									5.45		188.87									35100		49002
0	7222	0	hcd	399.89	119362	131.145	118541	0	0	0	0	0	0	0	0	4848.05	4442.77	118541	0									13		302.46									45300		49302
0	7224	0	hcd	439.72	30969.4	131.145	30830.9	0	0	0	0	0	0	0	0	1340.6	840.03	30830.9	0									3.69		83.35									31300		48602
0	7225	0	hcd	674.95	22406	131.145	21921.2	0	0	0	0	0	0	0	0	0	95.84	21921.2	0											45.19											48002
0	7228	0	hcd	547.23	60924.5	131.145	60908.5	0	0	0	0	0	0	0	0	935.77	1134.15	60908.5	0									2.38		147.04									32500		48502
0	7229	0	hcd	577.58	9325.79	131.144	9253.23	0	0	0	0	0	0	0	0	0	436.8	9253.23	0											21.41											46502
0	7230	0	hcd	506.72	25272.4	131.145	25269.4	0	0	0	0	0	0	0	0	1053.39	501.6	25269.4	0									2.75		62.34									33200		48302
0	7231	0	hcd	639.78	33510.8	131.144	32840.4	0	0	0	0	0	0	0	0	724.76	1177.83	32840.4	0									1.61		71.18									35300		48802
0	7233	0	hcd	493.57	95262.4	414.247	93459.4	0	0	0	0	0	0	0	0	2234.66	1428.39	93459.4	0									3.93		161.56									32900		48902
0	7234	0	hcd	414.21	53602.1	131.145	53541.2	0	0	0	0	0	0	0	0	1725.86	1292.35	53541.2	0									4.87		144.01									34800		49102
0	7235	0	hcd	543.57	59176	131.145	58357.4	0	0	0	0	0	0	0	0	1146.08	2271.48	58357.4	0									2.68		131.54									33500		49402
0	7237	0	hcd	536.57	148217	299.062	38332.2	0	0	0	0	0	0	0	0	1911.24	789.59	38332.2	0									4.56		87.81									34400		48702
0	7238	0	hcd	516.88	26310.3	131.144	26273.6	0	0	0	0	0	0	0	0	600.29	467.19	26273.6	0									1.57		64.79									31500		48302
0	7239	0	hcd	428.87	279322	369.553	162374	0	0	0	0	0	0	0	0	5268.62	4794.18	162374	0									4.53		136.28									33200		48902
0	7240	0	hcd	352.52	42377.3	365.701	18484.8	0	0	0	0	0	0	0	0	646.59	972.4	18484.8	0									1.96	2.84	53.78									34900	68700	48402
0	7241	1	hcd	378.2	112316	131.144	111387	0	0	0	0	0	0	0	0	3143.11	3842.05	111387	0									8.96		293.66									50100		49502
0	7243	0	hcd	534.23	107357	248.187	93805	0	0	0	0	0	0	0	0	1909.17	1724.26	93805	0									3.11		146.44									32300		48802
0	7244	0	hcd	634.94	14879.9	131.144	14879.9	0	0	0	0	0	0	0	0	0	140.4	14879.9	0											30.98											47602
0	7247	0	hcd	595.8	41873	248.187	24180.4	0	0	0	0	0	0	0	0	1149.3	299.46	24180.4	0									2.71		54.71									31200		47902
0	7248	0	hcd	335.55	104944	131.144	103552	0	0	0	0	0	0	0	0	4299.11	3776.91	103552	0									12.5		289.37									45500		49602
0	7250	0	hcd	486.74	86925.5	304.685	70480.8	0	0	0	0	0	0	0	0	2025.9	1190.63	70480.8	0									5.02		167.67									34100		49002
0	7251	0	hcd	470.73	28262.6	244.129	19825.9	0	0	0	0	0	0	0	0	0	356.4	19825.9	0											49.97											48102
0	7252	0	hcd	402.53	38721.4	348.542	35612	0	0	0	0	0	0	0	0	1020.92	1164.7	35612	0									2.83		94.56									33400		48902
0	7254	0	hcd	407.95	130303	149.023	34554.9	0	0	0	0	0	0	0	0	653.97	572.65	34554.9	0									1.81		93.48									31900		48602
0	7255	0	hcd	804.35	12050.4	657.88	11636.5	0	0	0	0	0	0	0	0	0	562.97	11636.5	0											21.24											45902
0	7256	0	hcd	343.54	38308.4	174.992	23604.5	0	0	0	0	0	0	0	0	0	661.29	23604.5	0											71.66											48502
0	7257	0	hcd	559.18	21823	131.144	21584.6	0	0	0	0	0	0	0	0	0	566.65	21584.6	0											48											48102
0	7259	0	hcd	671.63	11616.7	131.145	11563.9	0	0	0	0	0	0	0	0	0	672.04	11563.9	0											24.85											46702
0	7260	0	hcd	598.94	29328.3	131.144	28995.3	0	0	0	0	0	0	0	0	0	851.63	28995.3	0											67.88											48602
0	7261	0	hcd	542.83	905046	493.841	403761	0	0	0	0	0	0	0	0	15735.6	14160.5	403761	0									8.55		213.14									52700		49502
0	7262	0	hcd	554.54	15332.6	131.144	15004.4	0	0	0	0	0	0	0	0	0	758.16	15004.4	0										1.81	35.21										56500	47802
0	7265	0	hcd	476.84	118844	248.187	56439.2	0	0	0	0	0	0	0	0	1201.32	1193.14	56439.2	0									2.93		132.49									35100		48902
0	7266	0	hcd	639.53	24316.6	131.144	24207.7	0	0	0	0	0	0	0	0	0	303.68	24207.7	0											52.94											47902
0	7267	0	hcd	528.28	90318.1	528.283	17573.6	0	0	0	0	0	0	0	0	0	281.43	17573.6	0											40.61											47702
0	7268	0	hcd	490	38016.6	248.187	31973.6	0	0	0	0	0	0	0	0	615.04	0	31973.6	0									1.51		78.63									33500		48802
0	7270	1	hcd	573.28	73787.4	131.144	72660.4	0	0	0	0	0	0	0	0	3681.22	1334.48	72660.4	0									9.18		168.11									53300		49502
0	7273	1	hcd	410.53	76860.2	131.145	76533.8	0	0	0	0	0	0	0	0	1708.84	2196.37	76533.8	0									4.82		213.03									33900		49302
0	7274	0	hcd	434.19	36122.3	329.193	29007.7	0	0	0	0	0	0	0	0	1113.95	507.95	29007.7	0									3.08		77.25									33000		48702
0	7275	0	hcd	564.77	31723.4	131.145	31232.5	0	0	0	0	0	0	0	0	1318.1	0	31232.5	0									2.98		70.29									31900		48502
0	7277	0	hcd	551.9	28079.2	131.144	28029.4	0	0	0	0	0	0	0	0	973.89	232.18	28029.4	0									2.33		65.63									33100		48102
0	7278	1	hcd	414.88	54542.6	131.145	53984.3	0	0	0	0	0	0	0	0	1062.47	1785.17	53984.3	0									2.9		141.04									33500		49002
0	7280	0	hcd	569.51	148199	131.145	148174	0	0	0	0	0	0	0	0	3472.91	2976.15	148174	0									5.32		224.43									35700		49102
0	7281	0	hcd	402.93	52932.8	131.145	52818.4	0	0	0	0	0	0	0	0	1010.07	1193.77	52818.4	0									2.8		141.61									33800		48802
0	7282	1	hcd	635.27	23605.9	248.187	20993.4	0	0	0	0	0	0	0	0	0	443.42	20993.4	0											43.8											48102
0	7284	0	hcd	435.21	29089	131.144	29001.6	0	0	0	0	0	0	0	0	0	682.64	29001.6	0											75.42											48402
0	7285	0	hcd	652.23	23142.2	652.315	10984.1	0	0	0	0	0	0	0	0	0	651.73	10984.1	0										1.42	23.97										35900	47102
0	7286	0	hcd	495.25	182465	131.144	181381	0	0	0	0	0	0	0	0	10072	5200.71	181381	0									15.74		270.67									45902		49502
0	7287	0	hcd	332.52	12199.7	223.064	9440.94	0	0	0	0	0	0	0	0	0	141.48	9440.94	0											28.05											47402
0	7288	0	hcd	400.12	42315.2	131.145	41749.9	0	0	0	0	0	0	0	0	1303.26	1454.41	41749.9	0									3.48		109.41									34300		48902
0	7291	0	hcd	637.96	19316.6	131.144	19301.3	0	0	0	0	0	0	0	0	0	163.69	19301.3	0											41.56											47602
0	7292	0	hcd	584.24	18372.3	131.144	18331	0	0	0	0	0	0	0	0	0	122.93	18331	0											42.76											48002
0	7293	0	hcd	307.2	1.27348e+06	307.196	589159	0	0	0	0	0	0	0	0	0	8985.52	589159	0											888.04											49402
0	7295	0	hcd	455.61	179973	248.187	159069	0	0	0	0	0	0	0	0	7501.94	2708.3	159069	0									8.73		175.75									52300		48602
0	7296	0	hcd	404.73	107839	131.144	107541	0	0	0	0	0	0	0	0	4338.58	2871.78	107541	0									11.92		285.59									45300		49202
0	7297	0	hcd	511.65	29806.7	131.145	29724.7	0	0	0	0	0	0	0	0	1179.27	621.87	29724.7	0									2.81		70.65									35100		48402
0	7298	0	hcd	552.91	20881.3	131.144	20381	0	0	0	0	0	0	0	0	0	1015.81	20381	0										2.41	47.04										51700	48202
0	7300	0	hcd	643.31	244856	131.144	243742	0	0	0	0	0	0	0	0	7502.34	5260.15	243742	0									4.12		131.52									33500		49202
0	7301	0	hcd	449.97	42759.9	131.145	42593	0	0	0	0	0	0	0	0	1090.51	1084.99	42593	0									2.98		113.52									35100		48802
0	7302	0	hcd	503.25	29784.6	131.144	29406.4	0	0	0	0	0	0	0	0	647	830.57	29406.4	0									1.7		74.79									34300		48502
0	7304	0	hcd	377.19	70268.7	131.145	70101.1	0	0	0	0	0	0	0	0	1675.05	1722.35	70101.1	0									4.93		200.32									35400		49202
0	7305	0	hcd	652.32	26410.8	652.315	13137.8	0	0	0	0	0	0	0	0	0	202.89	13137.8	0											26.55											47402
0	7308	0	hcd	392.88	655591	149.023	292838	0	0	0	0	0	0	0	0	8753.18	5216.34	292838	0									9.03		297.89									49400		49102
0	7309	0	hcd	647.28	23771.8	131.145	23330	0	0	0	0	0	0	0	0	1177.73	208.1	23330	0									2.55		50.15									32700		48202
0	7311	0	hcd	615.79	32164.1	131.144	31813	0	0	0	0	0	0	0	0	755.8	727.3	31813	0									1.7		71.73									32000		48202
0	7312	0	hcd	396.43	74346.7	376.282	66553	0	0	0	0	0	0	0	0	3134.44	1297.58	66553	0									9.08		180.97									45200		48902
0	7313	0	hcd	379.84	42708.2	131.144	42503.6	0	0	0	0	0	0	0	0	995.96	1103.1	42503.6	0									2.93		122.9									33800		49002
0	7314	0	hcd	559.26	20854.7	131.144	20598.5	0	0	0	0	0	0	0	0	0	956.8	20598.5	0										2.21	47.63										62500	48302
0	7316	0	hcd	648.65	22942.7	131.144	22880.9	0	0	0	0	0	0	0	0	0	401.13	22880.9	0											47.97											47702
0	7317	0	hcd	324.56	49490.9	131.145	49401.9	0	0	0	0	0	0	0	0	1359.02	1260.68	49401.9	0									4.32		150.75									34500		48902
0	7318	0	hcd	502.27	39337.1	131.144	39196	0	0	0	0	0	0	0	0	1061.52	1065.89	39196	0									2.77		97.72									32100		48802
0	7319	0	hcd	689.54	4516.04	131.144	4416.73	0	0	0	0	0	0	0	0	0	0	4416.73	0											8.64											44900
0	7322	0	hcd	431.55	52302.3	131.144	52165.2	0	0	0	0	0	0	0	0	1403.52	973.71	52165.2	0									3.93		142.33									34000		48602
0	7323	0	hcd	359.22	95410.3	131.144	95206.9	0	0	0	0	0	0	0	0	2935.78	2447.24	95206.9	0									8.54		260.95									51800		49302
0	7324	0	hcd	528.57	39121.4	131.144	38528.1	0	0	0	0	0	0	0	0	0	1647.12	38528.1	0										3.25	86.88										62500	49102
0	7327	1	hcd	435.02	178967	383.751	119804	0	0	0	0	0	0	0	0	4927.57	2907.88	119804	0									11.35		263.21									45400		49002
0	7328	0	hcd	647.97	27839.5	131.144	27778.2	0	0	0	0	0	0	0	0	0	374.82	27778.2	0											59.06											48006
0	7329	0	hcd	468.58	44100.7	131.144	43509.5	0	0	0	0	0	0	0	0	758.63	1779.01	43509.5	0									1.96	3.87	111.71									35800	67100	49002
0	7331	0	hcd	349.17	38035.7	349.235	31891.4	0	0	0	0	0	0	0	0	0	709	31891.4	0											95.12											48602
0	7332	0	hcd	539.59	20399.5	131.144	20378.9	0	0	0	0	0	0	0	0	0	238.01	20378.9	0											48.27											47902
0	7333	1	hcd	465.56	136569	131.144	135871	0	0	0	0	0	0	0	168.24	4906.23	4338.1	135871	0									12.94		341.02									44700		49602
0	7334	0	hcd	365.16	91468.7	144.081	17604.6	0	0	0	0	0	0	0	0	0	218.53	17604.6	0											49.68											47802
0	7335	0	hcd	705.8	14282.5	603.285	2268.4	0	0	0	0	0	0	0	0	0	0	2268.4	0											4.49											34600
0	7337	0	hcd	362.22	5843656	131.144	5831658	0	0	0	0	0	0	0	0	213194	149272	5831658	0									12.38		315.78									45800		49402
0	7338	0	hcd	729.32	17812.8	610.331	2369.15	0	0	0	0	0	0	0	0	0	0	2369.15	0											4.83											34700
0	7339	0	hcd	852.37	2031.18	2332.37	751.57	0	0	0	0	0	0	0	0	0	0	751.57	0											1.37											35100
0	7340	0	hcd	585.5	12012	131.144	11842.9	0	0	0	0	0	0	0	0	0	376.52	11842.9	0											27.44											47102
0	7342	1	hcd	635.92	15044.8	131.144	15042.8	0	0	0	0	0	0	0	0	0	209.47	15042.8	0											33.19											47502
0	7343	0	hcd	486.55	307647	144.081	102137	0	0	0	0	0	0	0	0	0	1338.95	102137	0											64.79											48102
0	7344	0	hcd	336.88	72787.1	154.086	14623.1	0	0	0	0	0	0	0	0	0	888.47	14623.1	0										2.6	42.92										60200	47902
0	7345	0	hcd	548.92	28003.3	131.144	27608.3	0	0	0	0	0	0	0	0	0	904.33	27608.3	0											61.7											48702
0	7348	0	hcd	482.73	175171	472.288	153402	0	0	0	0	0	0	0	0	3732.72	3327.1	153402	0									2.45		100.39									34900		48602
0	7349	0	hcd	411.94	116195	358.699	97720	0	0	0	0	0	0	0	0	1969.46	2381.46	97720	0									4.11		196.9									34200		48902
0	7350	0	hcd	477.59	174470	131.144	174443	0	0	0	0	0	0	0	317.94	6536.84	3892.87	174443	0									11.41		292.13									44000		49202
0	7351	0	hcd	430.22	164582	131.144	163569	0	0	0	0	0	0	0	0	6094.95	5935.09	163569	0									15.47		390.37									46302		49402
0	7353	0	hcd	576.25	17443.2	131.144	17437.8	0	0	0	0	0	0	0	0	0	233.42	17437.8	0											40.42											47502
0	7354	0	hcd	555.23	11312.3	131.144	11256.5	0	0	0	0	0	0	0	0	0	653.96	11256.5	0										1.6	27.43										34700	47402
0	7355	1	hcd	570.94	89374.3	131.144	89274.5	0	0	0	0	0	0	0	0	4323.57	2242.6	89274.5	0									10.01		195.52									45200		49102
0	7356	0	hcd	603.05	43076.3	248.187	28453.2	0	0	0	0	0	0	0	0	0	582.69	28453.2	0											63.23											48302
0	7358	0	hcd	619.94	11028.7	131.144	11019.1	0	0	0	0	0	0	0	0	0	0	11019.1	0											23.68											46502
0	7359	0	hcd	820.34	2782.16	722.362	1708.78	0	0	0	0	0	0	0	0	0	0	1708.78	0											3.14											35700
0	7360	0	hcd	359.19	86253.7	131.145	86253	0	0	0	0	0	0	0	0	3975.31	1881.56	86253	0									11.47		244.44									44500		48902
0	7361	0	hcd	341.94	35581.2	131.144	35541.1	0	0	0	0	0	0	0	0	0	840.79	35541.1	0											101.49											48506
0	7362	0	hcd	614.31	36557.9	565.32	30884	0	0	0	0	0	0	0	0	933.74	1141.62	30884	0									2.04		65.35									31600		48702
0	7365	0	hcd	646.25	14513.5	548.6	7695.34	0	0	0	0	0	0	0	0	0	257.23	7695.34	0											17.22											45502
0	7366	0	hcd	590.29	35063.9	131.144	35060.2	0	0	0	0	0	0	0	0	894.4	666.78	35060.2	0									2.06		79.51									32800		48402
0	7367	0	hcd	726.02	14011.6	131.145	13938	0	0	0	0	0	0	0	0	0	839.25	13938	0											27.15											47502
0	7370	0	hcd	447.43	227864	361.025	20440	0	0	0	0	0	0	0	0	0	1012.14	20440	0											16.8											45202
0	7371	0	hcd	332.86	24694.3	131.144	24661.8	0	0	0	0	0	0	0	0	896.31	576.22	24661.8	0									2.88		76.86									33500		48502
0	7372	0	hcd	653.31	42137.1	534.32	33756.3	0	0	0	0	0	0	0	0	936.62	994.11	33756.3	0									2.17		73.12									33400		48602
0	7373	0	hcd	367.21	29955.6	131.144	29934.5	0	0	0	0	0	0	0	0	0	565.12	29934.5	0											90.23											48602
0	7374	0	hcd	402.54	113263	131.144	113260	0	0	0	0	0	0	0	0	4253.92	2887.48	113260	0									10.5		273.81									45500		48802
0	7375	0	hcd	649.26	19229.8	131.144	19210.8	0	0	0	0	0	0	0	0	0	65.19	19210.8	0											39.57											47202
0	7376	0	hcd	440.52	28638.2	131.144	28468.7	0	0	0	0	0	0	0	0	785.7	867.99	28468.7	0									2.1		75.06									33200		48702
0	7378	0	hcd	732.37	14287.2	131.145	14185.5	0	0	0	0	0	0	0	0	0	203.46	14185.5	0											27.81											46802
0	7379	0	hcd	623.23	5954.09	626.301	4649.44	0	0	0	0	0	0	0	0	0	0	4649.44	0											10.17											44200
0	7380	0	hcd	351.49	30843.8	131.144	30625.8	0	0	0	0	0	0	0	0	1069.63	719.75	30625.8	0									3.28		89.16									33000		48502
0	7381	0	hcd	507.89	15617.3	131.144	15534	0	0	0	0	0	0	0	0	623.84	880.88	15534	0									1.64	2.2	39.01									34300	60700	48102
0	7382	0	hcd	595.9	57297.4	524.907	40422.3	0	0	0	0	0	0	0	0	895.92	1389	40422.3	0									2		87.32									33200		48902
0	7384	0	hcd	409.87	53878.9	131.144	53875.3	0	0	0	0	0	0	0	0	1129.27	1054.81	53875.3	0									3.06		142.73									33900		48702
0	7385	0	hcd	467.56	61107.1	131.144	61107.1	0	0	0	0	0	0	0	0	1339.53	1519.02	61107.1	0									3.58		159.71									34200		49002
0	7386	0	hcd	435.87	491622	131.145	491613	0	0	0	0	0	0	0	0	17252.6	10788.3	491613	0									8.95		244.24									47900		49006
0	7387	0	hcd	551.56	46750	131.145	46702.2	0	0	0	0	0	0	0	0	1683.47	842.48	46702.2	0									3.96		104.89									31600		48902
0	7388	0	hcd	415.74	41797.1	131.144	41708.9	0	0	0	0	0	0	0	0	1161.62	923.33	41708.9	0									3.42		117.05									33400		48802
0	7389	0	hcd	441.89	71395.6	131.144	71213	0	0	0	0	0	0	0	0	1907.43	1923.29	71213	0									5.1		182.4									35500		49202
0	7390	0	hcd	347.19	57891	131.145	57794.2	0	0	0	0	0	0	0	0	1659.69	1362.91	57794.2	0									4.99		165.75									35000		48902
0	7391	0	hcd	340.88	70518.5	131.145	69857.7	0	0	0	0	0	0	0	0	2438.02	2567.87	69857.7	0									7.69		208.09									46500		49202
0	7393	0	hcd	329.57	290437	131.144	289439	0	0	0	0	0	0	0	533.75	11363	3780.54	289439	0									20.32		505.11									46502		49602
0	7394	0	hcd	464.63	70072.5	361.026	36956.6	0	0	0	0	0	0	0	0	1058.94	718.45	36956.6	0									2.77		94.11									35100		48502
0	7395	0	hcd	408.59	131724	149.023	34563.7	0	0	0	0	0	0	0	0	616.1	701.22	34563.7	0									1.77		98.27									35600		48602
0	7396	0	hcd	543	315766	493.841	182305	0	0	0	0	0	0	0	0	9006.57	0	182305	0									18.2		384.41									46002		49802
0	7397	0	hcd	364.54	25799	131.145	25482.4	0	0	0	0	0	0	0	0	0	871.55	25482.4	0											73.33											49006
0	7400	0	hcd	480.5	64916.1	131.145	64831	0	0	0	0	0	0	0	0	1985.79	1460.9	64831	0									5.15		161.9									34200		49002
0	7401	0	hcd	586.1	60854.8	131.145	60798.7	0	0	0	0	0	0	0	0	1328.62	1979.21	60798.7	0									2.91	4.32	130.06									32800	80700	48702
0	7402	1	hcd	439.87	56338	131.144	56171.8	0	0	0	0	0	0	0	0	1419.78	1214.76	56171.8	0									3.79		148.1									34900		49102
0	7403	0	hcd	686.28	9281.79	359.029	2430.5	0	0	0	0	0	0	0	0	0	0	2430.5	0											5.13											35900
0	7404	0	hcd	659.31	62656.1	610.318	27176.9	0	0	0	0	0	0	0	0	0	790.98	27176.9	0											58.41											48302
0	7406	0	hcd	663.89	6293.75	131.144	6286.28	0	0	0	0	0	0	0	0	0	0	6286.28	0											13.58											45900
0	7407	0	hcd	724	22896.2	131.144	22757.9	0	0	0	0	0	0	0	0	0	307.32	22757.9	0											47.97											48002
0	7408	0	hcd	477.98	34636.1	131.144	34555.1	0	0	0	0	0	0	0	0	0	608.19	34555.1	0											84.69											48602
0	7409	0	hcd	357.23	216219	131.144	214422	0	0	0	0	0	0	0	0	6308.69	3322.31	214422	0									15.56		525.93									46202		49602
0	7410	0	hcd	514.96	29634.9	482.252	24071.4	0	0	0	0	0	0	0	0	0	539.69	24071.4	0											56.15											48002
0	7412	1	hcd	472.94	145333	399.456	66895.1	0	0	0	0	0	0	0	0	2101.33	1554.57	66895.1	0									3.69		113.94									32300		48702
0	7413	0	hcd	384.8	122249	225.043	26606.7	0	0	0	0	0	0	0	0	883.07	475.47	26606.7	0									2.4		72.67									32200		48602
0	7414	0	hcd	329.53	478061	131.144	474767	0	0	0	0	0	0	0	0	19727.9	8479.68	474767	0									23.21		552.69									46602		49502
0	7415	0	hcd	490.92	49032.9	131.144	48987.4	0	0	0	0	0	0	0	0	1970.35	1039.45	48987.4	0									5.2		125.19									33200		48602
0	7416	0	hcd	335.22	53868.8	149.023	29456.4	0	0	0	0	0	0	0	0	839.49	888.3	29456.4	0									2.55		86.66									33300		49102
0	7419	0	hcd	323.21	40764.2	131.144	40663.3	0	0	0	0	0	0	0	0	979.43	924.43	40663.3	0									3.06		126.97									32300		49102
0	7420	0	hcd	348.86	56307.9	131.144	56179.4	0	0	0	0	0	0	0	0	1025.29	1331.44	56179.4	0									2.98		156.05									32800		48702
0	7421	0	hcd	560.88	17805.6	131.144	17589.3	0	0	0	0	0	0	0	0	0	526.23	17589.3	0											39.94											48202
0	7423	0	hcd	711.97	9764.53	131.144	9764	0	0	0	0	0	0	0	0	0	0	9764	0											19.3											46402
0	7424	0	hcd	632.28	12751.8	131.144	12728.9	0	0	0	0	0	0	0	0	0	425.9	12728.9	0											28.67											47302
0	7425	1	hcd	396.2	53874.1	131.144	53873.8	0	0	0	0	0	0	0	0	1149.06	1026.41	53873.8	0									3.29		148.57									33100		48802
0	7426	0	hcd	732.12	8595.66	131.144	8594.54	0	0	0	0	0	0	0	0	0	0	8594.54	0											17.61											45602
0	7427	0	hcd	669.81	16978.9	131.144	16718.9	0	0	0	0	0	0	0	0	0	466.34	16718.9	0											34.11											48302
0	7429	0	hcd	499.39	38527.2	131.144	38468.9	0	0	0	0	0	0	0	0	879.49	661.89	38468.9	0									2.23		96.93									35600		48902
0	7430	0	hcd	427.72	98396.3	131.144	98392.2	0	0	0	0	0	0	0	0	1956.11	2161.5	98392.2	0									5.09		247.19									35400		48802
0	7431	0	hcd	593.8	151320	544.807	51756.4	0	0	0	0	0	0	0	0	1422.84	1072.95	51756.4	0									3.08		109.13									34600		48802
0	7432	0	hcd	621.29	20325.9	131.144	20067.8	0	0	0	0	0	0	0	0	727.61	539.47	20067.8	0									1.67		44.09									31900		48402
0	7434	0	hcd	605.5	13632.2	131.144	13605.3	0	0	0	0	0	0	0	0	0	195.87	13605.3	0											30.91											47302
0	7435	0	hcd	523.25	44742.9	131.144	44739.9	0	0	0	0	0	0	0	0	1118.75	574.9	44739.9	0									2.8		106.08									34100		48302
0	7436	0	hcd	504.84	41648.4	418.995	30893.8	0	0	0	0	0	0	0	0	0	1083.41	30893.8	0										2.68	73.77										71700	48402
0	7439	0	hcd	526.74	17655.8	131.144	17538	0	0	0	0	0	0	0	0	0	1061.49	17538	0										2.55	42.46										63800	48302
0	7440	0	hcd	724.33	18158.7	131.145	18146	0	0	0	0	0	0	0	0	0	28.55	18146	0											36.31											47502
0	7441	0	hcd	522.79	73071.8	131.144	72349.1	0	0	0	0	0	0	0	0	1405.46	2313.84	72349.1	0									3.39		171.84									33400		49302
0	7442	0	hcd	381.46	32469.8	131.144	31636.8	0	0	0	0	0	0	0	0	0	1291.02	31636.8	0										3.02	85.22										67800	48802
0	7445	0	hcd	759.01	10032.1	131.144	9976.08	0	0	0	0	0	0	0	0	0	514.44	9976.08	0											19.62											46402
0	7446	0	hcd	487.76	260054	131.144	259923	0	0	0	0	0	0	0	562.19	11852.7	5317.89	259923	0									11.66		239.75									44600		49002
0	7447	0	hcd	447.47	252015	361.026	148994	0	0	0	0	0	0	0	0	5484.95	3026.92	148994	0									8.94		228.21									48800		49002
0	7448	0	hcd	503.92	53745.5	131.145	53205	0	0	0	0	0	0	0	0	1008.22	1977.93	53205	0									2.42	4.12	124.17									33600	69400	49002
0	7450	0	hcd	649.67	67574.5	131.144	67327.4	0	0	0	0	0	0	0	0	1092.83	1717.7	67327.4	0									2.31		139.4									31700		48902
0	7451	0	hcd	450.86	18394.6	131.144	18332.2	0	0	0	0	0	0	0	0	566.94	298.05	18332.2	0									1.55		49.86									30100		48006
0	7452	0	hcd	646.65	17448.5	131.144	17303.3	0	0	0	0	0	0	0	0	0	435.62	17303.3	0											34.23											47802
0	7455	0	hcd	438.69	33371.7	131.144	33371.6	0	0	0	0	0	0	0	0	0	707.92	33371.6	0											85.11											48702
0	7456	0	hcd	527.93	29138.5	131.144	29136.6	0	0	0	0	0	0	0	0	559.39	701.19	29136.6	0									1.38		71.26									36400		48602
0	7457	0	hcd	411.89	36281.9	131.144	35944	0	0	0	0	0	0	0	0	1443.1	1224.3	35944	0									3.87	3.18	94.74									34000	72100	49002
0	7460	0	hcd	437.13	37095.3	131.145	37030.5	0	0	0	0	0	0	0	0	1288	602.54	37030.5	0									3.45		94.93									33300		48802
0	7461	0	hcd	945.37	6907.94	798.406	6362.57	0	0	0	0	0	0	0	0	0	0	6362.57	0											10.45											45200
0	7466	0	hcd	397.21	53474	131.144	52971.4	0	0	0	0	0	0	0	0	1608.16	1692.18	52971.4	0									4.6		146.58									35100		49202
0	7467	0	hcd	528.64	24120	131.144	23909.2	0	0	0	0	0	0	0	0	0	516.66	23909.2	0											57.7											48602
0	7468	0	hcd	537.22	82715	299.062	30862.7	0	0	0	0	0	0	0	0	778.93	545.93	30862.7	0									1.85		70.94									35600		48502
0	7469	0	hcd	464.14	83842.4	361.026	42522.4	0	0	0	0	0	0	0	0	816.05	1434.68	42522.4	0									2.12		106.08									32200		49102
0	7471	1	hcd	630.25	1.3365e+06	538.276	615565	0	0	0	0	0	0	0	0	37415.1	7014.19	615565	0									8.96		135.88									48600		48902
0	7472	0	hcd	589.33	50978.4	131.145	50706.7	0	0	0	0	0	0	0	0	843.18	1497.77	50706.7	0									1.97		113.28									34100		48802
0	7475	0	hcd	584.58	35537.6	131.144	35443.2	0	0	0	0	0	0	0	0	1267.29	1225.54	35443.2	0									2.84	2.75	77.63									33200	73500	48602
0	7476	0	hcd	409.72	20195.6	149.023	19049.8	0	0	0	0	0	0	0	0	0	308.75	19049.8	0											51.75											48302
0	7477	0	hcd	424.22	38925.1	131.144	38704.9	0	0	0	0	0	0	0	0	822.3	1016.47	38704.9	0									2.27		106.44									32900		48802
0	7478	0	hcd	582.5	32333	131.145	32328	0	0	0	0	0	0	0	0	592.45	734.96	32328	0									1.41		75.28									34800		48402
0	7479	0	hcd	660.55	16892.9	131.145	16798.5	0	0	0	0	0	0	0	0	0	306.92	16798.5	0											34.43											47802
0	7482	0	hcd	366.89	127817	131.144	127642	0	0	0	0	0	0	0	0	4747.17	3700.21	127642	0									11.6		296.26									46200		49102
0	7483	0	hcd	434.6	69586.3	131.144	69543.5	0	0	0	0	0	0	0	0	1937.02	1610.11	69543.5	0									5.23		180.23									33700		48902
0	7484	0	hcd	576.61	63446.2	543.948	57369.4	0	0	0	0	0	0	0	0	2063.71	1926.05	57369.4	0									4.71		128.08									34200		49002
0	7487	0	hcd	339.19	56996	318.188	17901.5	0	0	0	0	0	0	0	0	0	293.6	17901.5	0											53.13											47802
0	7488	0	hcd	637.58	15362.1	131.145	14999.7	0	0	0	0	0	0	0	0	0	0	14999.7	0											31.1											47502
0	7491	0	hcd	560.76	116262	131.144	116180	0	0	0	0	0	0	0	0	3957.13	3016.2	116180	0									9.81		271.79									45600		49302
0	7492	0	hcd	508.97	32105.5	131.144	32043.5	0	0	0	0	0	0	0	0	0	579.64	32043.5	0											79.02											48102
0	7493	0	hcd	504.15	40012.4	131.144	39684.9	0	0	0	0	0	0	0	0	1203.19	989.32	39684.9	0									2.95		92.57									33400		48802
0	7495	0	hcd	458.8	48001.2	131.144	47963.1	0	0	0	0	0	0	0	0	1813.08	854.63	47963.1	0									4.66		120.01									35300		48902
0	7496	0	hcd	523.28	292795	131.144	289518	0	0	0	0	0	0	0	652.6	10379.3	5682.69	289518	0								1.46	23.66		652.65								36200	47202		49702
0	7497	0	hcd	640.33	83248.1	131.144	82918.2	0	0	0	0	0	0	0	0	2095.92	2696.92	82918.2	0									4.42		170.92									35100		49202
0	7500	0	hcd	515.57	19155.7	131.144	19147.3	0	0	0	0	0	0	0	0	595.71	155.43	19147.3	0									1.59		47.83									31800		48102
0	7501	0	hcd	413.27	34416	131.144	34365.4	0	0	0	0	0	0	0	0	1464.26	643	34365.4	0									4.18		93.14									34000		48402
0	7502	0	hcd	422.21	34394.7	131.144	34250.9	0	0	0	0	0	0	0	0	742.53	1085.36	34250.9	0									2.03		89.72									33300		49002
0	7505	0	hcd	442.04	33531.9	131.144	33521.4	0	0	0	0	0	0	0	0	578.61	637.29	33521.4	0									1.61		91.23									34100		48502
0	7506	0	hcd	634.26	11048.8	828.397	2012.6	0	0	0	0	0	0	0	0	0	0	2012.6	0											4.33											34400
0	7509	0	hcd	349.19	1.68053e+06	266.695	950647	0	0	0	0	0	0	0	2284.16	38303.9	29120.5	950647	0									12.36		289.12									45100		49302
0	7510	1	hcd	562.61	130027	561.278	118361	0	0	0	0	0	695.97	682.25	0	5052	3034.74	118361	0									11.6		255.94									46300		49102
0	7511	0	hcd	432.89	61980.8	131.145	61957.4	0	0	0	0	0	0	0	0	1568.58	1552.4	61957.4	0									3.96		156.3									32400		48902
0	7514	0	hcd	451.41	16329.4	131.144	16313.6	0	0	0	0	0	0	0	0	744.92	223.62	16313.6	0									2.03		43.41									34400		47702
0	7515	0	hcd	596.55	39002.8	248.187	28924.6	0	0	0	0	0	0	0	0	772.14	235.85	28924.6	0									1.75		65.34									35200		48102
0	7516	0	hcd	652.28	29097.9	131.144	29072	0	0	0	0	0	0	0	0	787.6	477.52	29072	0									1.77		64.41									32500		48002
0	7517	0	hcd	944.87	16473	798.403	11510.1	0	0	0	0	0	0	0	0	0	0	11510.1	0											20.06											46402
0	7518	0	hcd	601.87	9651.53	247.203	8056.08	0	0	0	0	0	0	0	0	0	0	8056.08	0											17.96											46902
0	7522	0	hcd	352	51330.6	131.144	51269.6	0	0	0	268.02	0	0	0	0	1071.02	922.22	51269.6	0									3.23		149.11									32600		49102
0	7523	0	hcd	386.93	28888.5	428.717	10197.4	0	0	0	0	0	0	0	0	0	81.26	10197.4	0											24.86											46502
0	7526	0	hcd	405.27	80835.9	131.145	80825.6	0	0	0	0	0	0	0	0	908.48	1570.72	80825.6	0									2.54		224.37									34900		49102
0	7527	0	hcd	648.22	26442.3	131.145	26245.7	0	0	0	0	0	0	0	0	0	886.67	26245.7	0											54.2											48102
0	7530	0	hcd	358.87	32762.4	131.144	32761.2	0	0	0	0	0	0	0	0	0	534.96	32761.2	0											95.73											48706
0	7531	0	hcd	503.27	96440.4	131.145	95706	0	0	0	0	0	0	0	0	2068.94	3415.85	95706	0									5.2		230.93									34500		49002
0	7533	1	hcd	491.24	30916.1	131.145	30905.8	0	0	0	0	0	0	0	0	617.61	523.96	30905.8	0									1.57		78.54									36100		48502
0	7534	0	hcd	619.96	14734.3	131.144	14586.4	0	0	0	0	0	0	0	0	885.91	230.62	14586.4	0									2.08		33.03									30600		47702
0	7535	0	hcd	351.71	34776.4	131.144	34734.8	0	0	0	0	0	0	0	0	860.2	614.31	34734.8	0									2.58		103.32									33500		48502
0	7536	0	hcd	343.94	49248.8	174.992	35270.5	0	0	0	0	0	0	0	0	566.67	1382.84	35270.5	0									1.59		99.7									33100		48802
0	7539	0	hcd	547.56	76299.2	131.144	76294.9	0	0	0	0	0	0	0	0	1692.58	1438.95	76294.9	0									3.96		175.66									32300		48702
0	7540	0	hcd	415.8	349321	131.144	346315	0	0	0	0	0	0	0	0	11728.9	5653.44	346315	0									20.15		591.78									46702		49702
0	7541	0	hcd	367.28	66871.1	131.144	66833.5	0	0	0	0	0	0	0	0	0	1712.45	66833.5	0											132.77											48802
0	7542	0	hcd	522.67	230346	248.187	143292	0	0	0	0	0	0	0	0	4900.53	3721.58	143292	0									11.39		324.24									45600		49302
0	7543	0	hcd	724.82	23417.2	706.347	7059.08	0	0	0	0	0	0	0	0	0	443.96	7059.08	0											14.01											45600
0	7544	0	hcd	506.97	21704.7	131.144	21409.8	0	0	0	0	0	0	0	0	0	648.3	21409.8	0											50.2											48102
0	7546	0	hcd	493.57	41845.5	131.145	41820.4	0	0	0	0	0	0	0	0	605.71	792.85	41820.4	0									1.52		101.06									35100		48802
0	7547	0	hcd	674.96	17473.2	131.144	17440.7	0	0	0	0	0	0	0	0	0	314.26	17440.7	0											36.42											47902
0	7548	0	hcd	357.96	98106.8	131.144	97659.1	0	0	0	0	0	0	0	0	3076.46	3124.17	97659.1	0									8.77		267.88									52700		49202
0	7551	0	hcd	534.23	86447.3	131.145	86284.1	0	0	0	0	0	0	0	0	2509.75	1724.06	86284.1	0									5.52		185.05									35400		48802
0	7552	0	hcd	632.64	13327.4	131.144	13327.3	0	0	0	0	0	0	0	0	699.64	2.52	13327.3	0									1.55		28.3									32300		47302
0	7553	0	hcd	485.24	44742.2	131.145	44742.2	0	0	0	0	0	0	0	0	2007.59	820.18	44742.2	0									5.06		108.01									34500		48502
0	7554	0	hcd	649.32	29845.2	131.145	29759.5	0	0	0	0	0	0	0	0	0	562.86	29759.5	0											63.41											48202
0	7557	0	hcd	470.26	69746.8	131.145	69712.1	0	0	0	0	0	0	0	0	1379.93	1579.75	69712.1	0									3.64		177.73									31900		48802
0	7558	0	hcd	537.23	76404.1	299.062	38238.1	0	0	0	0	0	0	0	0	812.41	631.88	38238.1	0									2.06		92.56									33900		48502
0	7559	0	hcd	331.69	15600.9	131.144	15564.3	0	0	0	0	0	0	0	0	0	941.24	15564.3	0										2.75	45.48										61000	47602
0	7562	0	hcd	646.93	26864.4	131.144	26854	0	0	0	0	0	0	0	0	0	279.99	26854	0											58.63											48302
0	7563	0	hcd	401.2	47399.1	131.144	47356.7	0	0	0	0	0	0	0	0	1185.18	1171.86	47356.7	0									3.44		134.18									32900		48702
0	7564	0	hcd	559.77	22909.4	131.144	22866.7	0	0	0	0	0	0	0	0	780	287.87	22866.7	0									1.9		53.51									32400		48302
0	7565	0	hcd	653.59	29997.2	131.145	29765.9	0	0	0	0	0	0	0	0	816.12	1008.94	29765.9	0									1.73		63.06									35700		48502
0	7568	0	hcd	721.98	10058.6	131.145	10058.6	0	0	0	0	0	0	0	0	0	0	10058.6	0											19.37											47102
0	7569	0	hcd	559.18	23972.6	489.769	19549.1	0	0	0	0	0	0	0	0	0	1184.5	19549.1	0										2.82	46.41										64200	48002
0	7570	0	hcd	530.23	37476.3	131.144	36921.9	0	0	0	0	0	0	0	0	707.69	1512.95	36921.9	0									1.7		87.17									34200		48602
0	7573	0	hcd	486.74	69363.6	304.685	69129.8	0	0	0	0	0	0	0	0	2272.38	1582.04	69129.8	0									5.53		158.81									36500		49002
0	7574	0	hcd	313.84	99641.4	214.64	85978.6	0	0	0	0	0	0	0	0	3522.45	2818.23	85978.6	0									10.4		239.84									45200		49302
0	7576	0	hcd	639.78	34059.1	131.144	34027.3	0	0	0	0	0	0	0	0	0	614.82	34027.3	0											75.7											48502
0	7577	0	hcd	382.21	37147.3	131.145	37134.4	0	0	0	0	0	0	0	0	1314.15	593.1	37134.4	0									3.87		104.64									32800		48402
0	7578	0	hcd	340.96	80459.3	131.144	80400.9	0	0	0	0	0	0	0	0	1687.4	2048.96	80400.9	0									5.18		239.11									35700		49302
0	7579	0	hcd	495.46	28953.8	131.144	28516.9	0	0	0	0	0	0	0	0	0	910.78	28516.9	0											68.1											48502
0	7581	0	hcd	573.61	51755.2	131.144	51607.4	0	0	0	0	0	0	0	0	1283.83	1406.64	51607.4	0									2.94		115.38									32800		48902
0	7582	0	hcd	516.91	18302.5	131.145	18302.5	0	0	0	0	0	0	0	0	0	393.64	18302.5	0											43.06											47702
0	7583	0	hcd	530.48	24231	131.144	24191.7	0	0	0	0	0	0	0	0	670.19	306.54	24191.7	0									1.58		57.12									33400		48302
0	7584	0	hcd	551.24	26036.2	131.144	25652.1	0	0	0	0	0	0	0	0	0	766.96	25652.1	0											59.03											48402
0	7587	0	hcd	343.18	28222.4	131.144	28167.7	0	0	0	0	0	0	0	0	0	482.56	28167.7	0											86.2											48702
0	7588	0	hcd	623.59	7650.28	239.094	6260.01	0	0	0	0	0	0	0	0	0	0	6260.01	0											14.02											44800
0	7590	0	hcd	569.51	86160.3	131.144	86153.4	0	0	0	0	0	0	0	0	1662.33	1567.65	86153.4	0									3.85		190.02									32700		48802
0	7591	0	hcd	558.35	17854.8	131.144	17763.7	0	0	0	0	0	0	0	0	0	291.1	17763.7	0											40.29											48202
0	7592	0	hcd	501.64	33923.7	131.144	33844.1	0	0	0	0	0	0	0	0	870.52	667.66	33844.1	0									2.2		84.36									33700		48502
0	7593	0	hcd	514.26	40797.9	131.144	40364.1	0	0	0	0	0	0	0	0	643.62	1333.84	40364.1	0									1.54		95.87									35500		48802
0	7597	0	hcd	448.25	184565	131.145	184318	0	0	0	0	0	0	0	0	7323.12	4899.93	184318	0									14.99		363.84									46402		49102
0	7598	0	hcd	440.87	53071.1	131.144	52549.9	0	0	0	0	0	0	0	0	2765.02	1774.9	52549.9	0									6.93		129.89									44900		49102
0	7601	0	hcd	455.61	138727	248.187	120111	0	0	0	0	0	0	0	0	4656.08	3187.83	120111	0									9.56		231.23									44900		49306
0	7602	0	hcd	627.28	19612.2	557.282	8025.35	0	0	0	0	0	0	0	0	0	0	8025.35	0											18.4											45702
0	7603	0	hcd	582.62	45076.7	131.144	44893.5	0	0	0	0	0	0	0	0	1244.39	964.36	44893.5	0									2.78		98.19									35400		48602
0	7604	0	hcd	589.58	20720.5	131.144	20515.5	0	0	0	0	0	0	0	0	0	984.88	20515.5	0										2.24	46.79										61600	48102
0	7606	0	hcd	511.9	33996.9	131.144	33996.9	0	0	0	0	0	0	0	0	985.72	736.86	33996.9	0									2.53		82.38									35000		48702
0	7607	0	hcd	381.87	31097.1	131.144	31049.6	0	0	0	0	0	0	0	0	676.68	684.02	31049.6	0									1.96		88.96									31800		48802
0	7608	0	hcd	671.87	28651.4	622.882	17931.8	0	0	0	0	0	0	0	0	0	378.48	17931.8	0											37.94											48002
0	7609	0	hcd	576.01	14871.5	131.144	14785.7	0	0	0	0	0	0	0	0	0	220.64	14785.7	0											33.86											47102
0	7611	0	hcd	643.31	28451.3	131.144	28447.3	0	0	0	0	0	0	0	0	1358.55	329.65	28447.3	0									3.05		62.56									33600		48402
0	7612	1	hcd	474.98	44465.9	131.144	44420	0	0	0	0	0	0	0	0	779.92	669.56	44420	0									1.97		109.43									34600		48502
0	7613	0	hcd	598.75	26389.9	772.373	24977.9	0	0	0	0	0	0	0	0	866.24	232.33	24977.9	0									2.12		57.07									34600		48006
0	7614	0	hcd	404.73	76226.8	131.144	76048.9	0	0	0	0	0	0	0	0	4297.25	1786.48	76048.9	0									12.44		214.63									45400		49302
0	7615	0	hcd	715.97	8453.09	131.144	8268.4	0	0	0	0	0	0	0	0	0	411.27	8268.4	0											16.59											45002
0	7617	0	hcd	720.36	12153.4	671.368	7417.42	0	0	0	0	0	0	0	0	0	364.2	7417.42	0											14.77											44102
0	7618	0	hcd	615.95	8478.41	131.145	8450.37	0	0	0	0	0	0	0	0	0	439.36	8450.37	0											19.67											46202
0	7619	0	hcd	366.88	303747	131.144	303090	0	0	0	0	0	0	0	0	11136	7451.91	303090	0									9.5		238.16									49400		49302
0	7620	0	hcd	536.98	79723.7	463.744	56315.3	0	0	0	0	0	0	0	0	1739.3	1944.72	56315.3	0									3.21		101.61									33700		48902
0	7623	1	hcd	514.24	52762.2	131.145	52713.7	0	0	0	0	0	0	0	0	1401.23	1707.94	52713.7	0									3.49	4.32	130.45									34700	80900	48702
0	7624	0	hcd	661.31	33724.1	612.322	32813.4	0	0	0	0	0	0	0	0	872.95	853.93	32813.4	0									1.76		66.61									38000		48502
0	7625	0	hcd	426.56	176879	131.145	176623	0	0	0	0	0	0	0	0	4008.39	4301.13	176623	0									5.6		240.57									36100		49102
0	7626	1	hcd	584.99	81671.1	131.145	81248.3	0	0	0	0	0	0	0	0	2080.24	2607.89	81248.3	0									4.61		178.83									33900		49002
0	7629	0	hcd	549.82	36346.3	131.145	36236.1	0	0	0	0	0	0	0	0	1784.24	896.59	36236.1	0									4.53		87.52									33400		48802
0	7630	0	hcd	595.61	70288.4	562.956	51177.7	0	0	0	0	0	0	0	0	2103.22	1174.04	51177.7	0									4.77		110.3									33100		49102
0	7631	0	hcd	502.61	72338.3	131.144	71437.7	0	0	0	0	0	0	0	0	945.67	2969.01	71437.7	0									2.23		166.31									34300		49202
0	7634	0	hcd	498.73	27188.5	248.187	25508.9	0	0	0	0	0	0	0	0	708.48	487.28	25508.9	0									1.8		64.41									33600		48002
0	7635	0	hcd	336.44	24708.3	131.145	24685.4	0	0	0	0	0	0	0	0	977.81	404.38	24685.4	0									3.07		74.79									33500		48502
0	7636	0	hcd	476.84	25359.9	131.145	25359.9	0	0	0	0	0	0	0	0	0	0	25359.9	0											63.64											48502
0	7639	0	hcd	548.26	282711	494.271	154128	0	0	0	0	0	0	0	0	2834.64	3606.47	154128	0									3.44		184.8									33500		49002
0	7640	0	hcd	431.8	387605	131.145	384577	0	0	0	0	0	0	0	0	11660.2	5438.95	384577	0									28.1		923.86									47602		49602
0	7642	0	hcd	577.75	28355.1	131.145	28263.4	0	0	0	0	0	0	0	0	1087.93	399.08	28263.4	0									2.6		66.46									32800		48302
0	7643	1	hcd	435.02	117963	131.145	117706	0	0	0	0	0	0	0	0	4636.02	2746.6	117706	0									11.95		283.92									45900		49402
0	7644	0	hcd	614.64	17584	348.688	12007.9	0	0	0	0	0	0	0	0	0	0	12007.9	0											27											47002
0	7645	0	hcd	507.97	20784.3	131.145	20401	0	0	0	0	0	0	0	0	817.35	0	20401	0									1.99		49.54									33100		48406
0	7647	0	hcd	362.22	499637	131.145	498589	0	0	0	0	0	0	0	1606.39	20740.6	12906.3	498589	0								1.33	17.88		410.24								29000	46702		49402
0	7648	1	hcd	489.27	146123	131.145	144740	0	0	0	0	0	0	0	0	4416.59	5234.18	144740	0									11.08		340.85									46300		49402
0	7649	0	hcd	404.71	73230.2	131.145	73149.9	0	0	0	0	0	0	0	0	3110.7	1729.89	73149.9	0									8.97		198.68									45300		49202
0	7650	0	hcd	563.31	34286.2	131.145	33926.4	0	0	0	0	0	0	0	0	708.61	1217.52	33926.4	0									1.72	2.82	78.6									32700	68100	48802
0	7653	1	hcd	411.45	30295.5	131.145	30208.8	0	0	0	0	0	0	0	0	786.04	483.25	30208.8	0									2.32		83.58									33100		48602
0	7654	0	hcd	337.84	43059.6	304.847	37813.3	0	0	0	0	0	0	0	0	0	960.23	37813.3	0											114.35											48702
0	7655	0	hcd	671.63	21637.1	622.883	17036.8	0	0	0	0	0	0	0	0	0	0	17036.8	0											34.73											47602
0	7657	0	hcd	482.98	40956.4	131.145	40942.9	0	0	0	0	0	0	0	0	704.39	707.18	40942.9	0									1.75		100.51									34000		48502
0	7658	0	hcd	505.76	119870	456.767	110005	0	0	0	0	0	0	0	0	4068.88	3197.27	110005	0									10.28		259.67									45200		49302
0	7659	0	hcd	392.89	753286	149.023	124227	0	0	0	0	0	0	0	0	1888.73	2312.77	124227	0									4.57		282.83									36700		49302
0	7660	0	hcd	653.34	31459.3	248.187	29333.7	0	0	0	0	0	0	0	0	0	904.06	29333.7	0											61.21											48802
0	7662	0	hcd	637.96	12896.8	131.145	12860.2	0	0	0	0	0	0	0	0	0	667.52	12860.2	0											28.25											46902
0	7663	0	hcd	335.2	52953.4	149.023	40325.2	0	0	0	0	0	0	0	0	1498.51	970.94	40325.2	0									4.6		118.62									35600		48702
0	7664	0	hcd	602.91	8131.34	131.145	8125.06	0	0	0	0	0	0	0	0	0	0	8125.06	0											18.24											46402
0	7665	0	hcd	675.62	9975.31	131.145	9894.63	0	0	0	0	0	0	0	0	0	616.71	9894.63	0										1.37	21.32										28200	46902
0	7666	0	hcd	350.69	22408.8	170.124	21959	0	0	0	0	0	0	0	0	0	801.96	21959	0										2.41	65.06										68800	48402
0	7669	0	hcd	316.54	100639	131.144	99690.1	0	0	0	0	0	0	0	199.57	3266.58	3872.12	99690.1	0									10.17		299.17									45600		49302
0	7670	1	hcd	449.97	32006.1	131.145	32003.2	0	0	0	0	0	0	0	0	955.48	1196.78	32003.2	0									2.5	3.16	83.59									33800	74700	48502
0	7671	0	hcd	820.84	13220.9	131.144	13169.5	0	0	0	0	0	0	0	0	0	765.5	13169.5	0										1.38	23.83										37000	47102
0	7672	0	hcd	462.15	409571	359.028	60705.8	0	0	0	0	0	0	0	0	3884.25	1286.3	60705.8	0									10.05		149.35									45300		48702
0	7674	0	hcd	440.23	592436	408.216	260850	0	0	0	0	0	0	0	0	22335.3	4839.96	260850	0									45.08		532.21									48102		49802
0	7675	0	hcd	614.96	43796.4	582.636	33011.2	0	0	0	0	0	0	0	0	1278.77	601.5	33011.2	0									2.96		73.13									32900		48302
0	7676	1	hcd	538.57	96689	312.178	44657.6	0	0	0	0	0	0	0	0	0	1323.37	44657.6	0											102.81											48702
0	7677	0	hcd	364.19	21095.6	131.145	20945.3	0	0	0	0	0	0	0	0	583.86	668.1	20945.3	0									1.63		57.78									33100		48102
0	7679	1	hcd	543.52	162103	131.144	161968	0	0	0	0	0	0	0	298.15	6471.12	4017.85	161968	0									14.28		344.76									46300		49402
0	7680	0	hcd	470.36	23537.1	421.267	21469.2	0	0	0	0	0	0	0	0	0	222.38	21469.2	0											58.44											48306
0	7681	1	hcd	432.73	159683	131.145	159671	0	0	0	0	0	0	0	0	5854.15	3861.78	159671	0									14.9		391.15									45300		49106
0	7682	0	hcd	515.96	49945.1	131.145	49698.4	0	0	0	0	0	0	0	0	1368.77	1763.06	49698.4	0									3.18		111.49									33700		48802
0	7685	0	hcd	421.54	46122.1	131.144	46114.3	0	0	0	0	0	0	0	0	1446.17	1011.25	46114.3	0									3.95		124.08									32600		48602
0	7686	0	hcd	565.2	25154.4	131.144	25127.9	0	0	0	0	0	0	0	0	0	407.05	25127.9	0											60.15											47902
0	7687	0	hcd	576.64	31691.3	131.144	31691	0	0	0	0	0	0	0	0	733.76	676.68	31691	0									1.86		74.81									33600		48202
0	7688	0	hcd	562.75	14386.3	131.144	14250.8	0	0	0	0	0	0	0	0	0	321.04	14250.8	0											32.02											47702
0	7691	1	hcd	461.47	186229	359.028	103162	0	0	0	0	0	0	0	0	4695.45	2676.99	103162	0									10.7		226.16									45300		49002
0	7692	0	hcd	477.21	51601.1	131.145	51599.3	0	0	0	0	0	0	0	0	1154.26	889.89	51599.3	0									2.86		123.08									33500		48602
0	7693	0	hcd	430.23	42693.1	131.145	42331.1	0	0	0	0	0	0	0	0	1070.2	1313.8	42331.1	0									2.86		110.36									33600		48702
0	7695	0	hcd	624.63	64569.7	591.966	42800.6	0	0	0	0	0	0	0	0	852.18	1145.77	42800.6	0									1.83		90.35									34300		48702
0	7696	1	hcd	464.9	123210	131.145	123105	0	0	0	0	0	0	0	0	6100.67	3391.81	123105	0									15.81		299.92									45802		49302
0	7697	0	hcd	414.88	43957.6	131.145	43745.4	0	0	0	0	0	0	0	0	3850.81	1468.36	43745.4	0									10.55		116.22									44300		49102
0	7700	1	hcd	479.73	141055	508.299	120472	0	0	0	0	0	0	0	0	6665.01	2806.81	120472	0									11.56		203.92									45400		49202
0	7701	0	hcd	621.27	30269.2	131.145	30202.1	0	0	0	0	0	0	0	0	0	289.92	30202.1	0											69.17											48302
0	7702	0	hcd	534.26	224774	131.145	224564	0	0	0	0	0	0	0	0	4462.29	4430.78	224564	0									3.95		190.57									33600		49002
0	7703	0	hcd	481.72	41083.5	131.144	40901.5	0	0	0	0	0	0	0	0	1337.26	1243.98	40901.5	0									3.31		97.3									33400		48602
0	7705	0	hcd	642.3	18282.2	131.144	18256.7	0	0	0	0	0	0	0	0	0	1422.15	18256.7	0										3.23	40.3										61100	48102
0	7706	0	hcd	922.45	16760.5	873.454	4924.31	0	0	0	0	0	0	0	0	0	0	4924.31	0											8.36											47600
0	7707	0	hcd	652.97	52404.8	131.145	52177	0	0	0	0	0	0	0	0	977.66	1208.87	52177	0									2.22		112.28									34000		48702
0	7708	0	hcd	639.31	33764.9	131.145	33758.3	0	0	0	0	0	0	0	0	709.69	736.9	33758.3	0									1.61		75.55									33800		48402
0	7709	0	hcd	598.27	20128.5	131.145	19967.9	0	0	0	0	0	0	0	0	0	901.46	19967.9	0										2.01	42.68										60900	47802
0	7712	0	hcd	385.55	120528	225.043	66557.7	0	0	0	0	0	0	0	0	1259.97	1484.69	66557.7	0									3.48		181.58									35400		49102
0	7713	0	hcd	489.73	91415.3	131.145	90588.8	0	0	0	0	0	0	0	0	1781.23	3421.11	90588.8	0									4.21		205.46									34000		49302
0	7715	1	hcd	472.94	59909.4	399.456	53373.9	0	0	0	0	0	0	0	0	1471.6	1889.61	53373.9	0									3.69	4.55	125.89									34000	81300	49002
0	7716	0	hcd	451.73	72356.4	131.145	72137.8	0	656.43	0	0	0	0	0	0	1731.66	1612.17	72137.8	0		1.73							4.53		181.15		31500							36700		49102
0	7717	0	hcd	468.97	52764.8	131.145	52164.2	0	0	0	0	0	0	0	0	1260	1905.87	52164.2	0									3.17		128.97									34800		49302
0	7719	0	hcd	374.1	159199	288.007	25374.1	0	0	0	0	0	0	0	0	696.37	1286.09	25374.1	0									1.82	3.22	63.58									32600	70400	48202
0	7720	0	hcd	424.15	46612.8	131.145	46336.1	0	0	0	0	0	0	0	0	950.31	870.34	46336.1	0									2.54		124.4									31700		48802
0	7721	0	hcd	454.63	77423.8	131.145	77214.1	0	0	0	0	0	0	0	0	2469.07	1324.22	77214.1	0									3.64		112.22									32200		48902
0	7722	0	hcd	402.88	62735.9	356.218	54891.1	0	0	0	0	0	0	0	0	1817.13	1169.48	54891.1	0									4.75		142.76									34100		49002
0	7723	0	hcd	554.89	23272.6	131.145	23270.3	0	0	0	0	0	0	0	0	0	1020.81	23270.3	0										2.5	55.03										67600	48102
0	7726	0	hcd	499.58	104724	272.172	81165.7	0	0	0	0	0	0	0	0	2273.83	1819.69	81165.7	0									5.29		183.89									36000		49202
0	7727	0	hcd	561.88	41629.2	131.145	41320.6	0	0	0	0	0	0	0	0	1566.7	1131.39	41320.6	0									3.82		100.44									33500		49002
0	7728	1	hcd	558.5	88163.4	248.187	39598.2	0	0	0	0	0	0	0	0	1083.17	587.55	39598.2	0									2.51		89.37									35200		48902
0	7729	0	hcd	599.94	16181.7	131.145	16180.3	0	0	0	0	0	0	0	0	0	339	16180.3	0											35.46											47302
0	7732	0	hcd	631.81	1.03762e+06	533.828	916346	0	0	0	0	0	0	0	0	16794.1	22911.7	916346	0									5.09		266.71									35100		49302
0	7733	0	hcd	831.83	9438.06	733.851	6336.33	0	0	0	0	0	0	0	0	0	0	6336.33	0											11.08											45300
0	7734	0	hcd	358.86	31768.4	131.144	31763.2	0	0	0	0	0	0	0	0	0	414.73	31763.2	0											97.13											48402
0	7735	0	hcd	352.18	79172.6	131.145	79171.2	0	0	0	0	0	0	0	0	1358.26	2631.71	79171.2	0									4.01		229.15									35400		48902
0	7737	0	hcd	605.5	18870.7	131.144	18560.7	0	0	0	0	0	0	0	0	0	0	18560.7	0											44.35											48002
0	7738	0	hcd	847.3	8655	131.145	8623.88	0	0	0	0	0	0	0	0	751.04	0	8623.88	0									1.33		15.15									33700		44802
0	7739	0	hcd	351.93	91478.1	131.145	91321.9	0	0	0	0	0	0	0	0	2918.62	1956.71	91321.9	0									8.61		263.32									49100		49302
0	7740	0	hcd	672.31	56027.2	623.326	26494.6	0	0	0	0	0	0	0	0	0	1410.56	26494.6	0										3.08	57.95										68200	48202
0	7741	0	hcd	395.22	32438.5	331.224	28595.5	0	0	0	0	0	0	0	0	0	631.86	28595.5	0											78.35											48502
0	7744	0	hcd	591.92	89546.6	131.145	89304	0	0	0	0	0	0	0	0	4141.59	2118.99	89304	0									7.7		163.89									46200		49102
0	7745	0	hcd	409.76	24503.8	131.145	24489.7	0	0	0	0	0	0	0	0	1111.59	530.65	24489.7	0									2.92		64.51									34000		48502
0	7747	0	hcd	407.52	50941.7	173.129	28074.9	0	0	0	0	0	0	0	0	872.74	598.79	28074.9	0									2.49		79.11									34900		48702
0	7748	0	hcd	588.24	33394.6	131.145	33318.7	0	0	0	0	0	0	0	0	0	527.99	33318.7	0											76.2											48302
0	7749	0	hcd	570.23	48977.7	131.145	48952	0	0	0	0	0	0	0	0	0	1406.77	48952	0											108.01											48602
0	7752	0	hcd	649.67	75591.5	131.144	75564.6	0	0	0	0	0	0	0	0	1439.45	1483.96	75564.6	0									3.26		162.29									33100		49002
0	7753	0	hcd	650.01	73672.2	131.144	73543.5	0	0	0	0	0	0	0	0	1704.97	1833.12	73543.5	0									3.52		150.73									34800		48902
0	7754	0	hcd	497.24	39222.6	131.144	39123.8	0	0	0	0	0	0	0	0	1195.88	836.74	39123.8	0									3.19		99.4									33000		48502
0	7755	0	hcd	480.5	87884.9	131.144	87883.4	0	0	0	0	0	0	0	0	3383.7	1935.98	87883.4	0									8.23		211.01									49400		48902
0	7756	0	hcd	502.92	52045.7	131.144	51639.2	0	0	0	0	0	0	0	0	0	1677.79	51639.2	0											116.4											48902
0	7758	0	hcd	646.65	39891.2	131.145	39850	0	0	0	0	0	0	0	0	753.05	806.46	39850	0									1.67		87.87									35700		48602
0	7759	0	hcd	337.53	31436.1	131.145	31215	0	0	0	0	0	0	0	0	989.93	1035.88	31215	0									3.09		94.25									32200		49002
0	7762	0	hcd	744.33	10284.9	248.187	8986.82	0	0	0	0	0	0	0	0	0	0	8986.82	0											17.89											45902
0	7763	0	hcd	339.81	18834.2	275.125	17841.7	0	0	0	0	0	0	0	0	498.44	240.6	17841.7	0									1.52		52.62									35200		48402
0	7764	0	hcd	483.56	181821	489.783	35805.2	0	0	0	0	0	0	0	0	0	0	35805.2	0											35.68											46902
0	7765	0	hcd	329.57	128349	131.145	127886	0	0	0	0	0	0	0	0	4819.92	4113.69	127886	0									12.23		311.45									44300		49402
0	7766	0	hcd	573.26	70990	131.145	70456.3	0	0	0	0	0	0	0	0	2232.37	2379.91	70456.3	0									5.21		157.37									36000		49102
0	7768	0	hcd	725.34	38853.3	655.338	10306.4	0	0	0	0	0	0	0	0	0	0	10306.4	0											20.73											46702
0	7769	0	hcd	887.38	17563.8	838.39	15731.2	0	0	0	0	0	0	0	0	0	131.31	15731.2	0											27.02											46502
0	7770	0	hcd	437.38	221491	131.145	221224	0	0	0	0	0	0	0	0	3934.85	5333.12	221224	0									5.1		278.39									35300		49202
0	7771	0	hcd	566.29	51904.6	131.145	51285.2	0	0	0	0	0	0	0	0	792.37	0	51285.2	0									1.79		111.24									32000		49002
0	7774	0	hcd	436.88	290025	131.145	289799	0	0	0	0	0	0	0	0	11727.9	7341.23	289799	0									11.11		262.01									45500		49302
0	7775	0	hcd	397.86	46149.5	131.145	46149	0	0	0	0	0	0	0	0	1121.32	769.23	46149	0									3.23		129.12									33300		48702
0	7776	0	hcd	592.94	310487	527.951	223227	0	0	0	0	0	0	0	0	4958.52	5896.44	223227	0									5.14		220.25									37700		48902
0	7777	1	hcd	504.99	52116.7	131.145	52017.7	0	0	0	0	0	0	0	0	774.01	910.82	52017.7	0									1.85		124.07									33900		48802
0	7778	0	hcd	627.05	14816.5	131.144	14616.2	0	0	0	0	0	0	0	0	0	372.42	14616.2	0											31.39											47202
0	7781	0	hcd	409.52	35483.9	149.023	24463.7	0	0	0	0	0	0	0	0	0	519.53	24463.7	0											67.33											48202
0	7782	0	hcd	496.54	40494.5	131.144	39849	0	0	0	0	0	0	0	0	0	1448.2	39849	0										3.58	97.83										74100	49002
0	7784	0	hcd	654.81	17301.6	131.145	17247.2	0	0	0	0	0	0	0	0	0	199.21	17247.2	0											37.12											47402
0	7785	0	hcd	475.73	48121.2	131.145	48066.5	0	0	0	0	0	0	0	0	979.13	1039	48066.5	0									2.59		120.55									33100		48602
0	7786	0	hcd	502.24	67662.6	131.145	67430.6	0	0	0	0	0	0	0	0	1752.37	1579.61	67430.6	0									4.42		162.55									33800		48902
0	7787	0	hcd	637.76	16733.6	131.144	16399.2	0	0	0	0	0	0	0	0	0	444.9	16399.2	0											34.22											47602
0	7789	0	hcd	335.22	54648.5	149.023	23307.9	0	0	0	0	0	0	0	0	960.43	379.25	23307.9	0									2.93		70.16									33000		47902
0	7790	0	hcd	621.79	31370.4	131.144	31234.6	0	0	0	0	0	0	0	0	0	645.04	31234.6	0											70.17											48502
0	7791	0	hcd	495.91	68135.7	131.144	67312.8	0	0	0	0	0	0	0	0	1984.22	2559.4	67312.8	0									4.86		161.61									35700		49202
0	7794	0	hcd	526.28	52518.4	131.145	52510.5	0	0	0	0	0	0	0	0	968.89	863.35	52510.5	0									2.51		127.68									34800		48702
0	7795	0	hcd	321.55	50833.4	131.145	50691.9	0	0	0	0	0	0	0	0	1604.35	1191.41	50691.9	0									5.24		158.38									35100		49102
0	7796	0	hcd	543	91466.3	131.145	91455.9	0	0	0	0	0	0	0	0	4004.55	2207.72	91455.9	0									9.49		209.21									45600		49202
0	7797	0	hcd	394.22	46477.9	131.145	46466.2	0	0	0	0	0	0	0	0	1323.53	944.32	46466.2	0									3.73		125.63									34300		48502
0	7798	0	hcd	514.96	27536.8	131.145	27291.9	0	0	0	0	0	0	0	0	627.02	690.92	27291.9	0									1.49		64.66									33700		48402
0	7800	0	hcd	860.03	16993.2	138.055	0	0	0	0	0	0	0	0	0	0	0	0	0
0	7801	0	hcd	346.03	24552.6	174.992	21468	632.45	0	0	0	0	0	0	0	0	241.02	21468	0	2.07										65.28	35100										48102
0	7802	0	hcd	330.89	432498	230.176	368359	0	0	0	0	0	0	0	0	12204.4	6194.13	368359	0									18.84		562.19									46502		49502
0	7803	0	hcd	673.32	18819.8	131.145	18678.5	0	0	0	0	0	0	0	0	0	291.44	18678.5	0											36.75											48102
0	7806	0	hcd	351.95	63292.4	131.145	63246.2	0	0	0	0	0	0	0	0	2659.87	1247.22	63246.2	0									7.88		183.88									48100		48802
0	7807	0	hcd	561.24	30532.5	131.144	30524.3	0	0	0	0	0	0	0	0	599.57	1393.91	30524.3	0									1.41	3.34	70.57									28900	64800	48402
0	7808	1	hcd	424.72	95839.9	470.272	82273.2	0	0	0	0	0	0	0	0	2348.92	1872.38	82273.2	0									4.23		145									34300		48702
0	7809	0	hcd	558.25	64542.4	131.145	64298.7	0	0	0	0	0	0	0	0	1649.34	1983	64298.7	0									3.57		133.72									33100		48802
0	7812	0	hcd	463.9	77737.7	361.026	66678.2	0	0	0	0	0	0	0	0	2052.18	1555.7	66678.2	0									5.56		174.33									35200		48802
0	7813	0	hcd	508.91	28897.2	131.145	28816.3	0	0	0	0	0	0	0	0	0	694.1	28816.3	0											73.37											48402
0	7814	0	hcd	413.58	262910	131.145	259689	0	0	0	0	0	0	0	0	12682.1	4062.34	259689	0									26.53		539.98									47502		49802
0	7815	0	hcd	450.46	25632.6	131.144	25499.2	0	0	0	0	0	0	0	0	0	396.78	25499.2	0											67.3											48302
0	7816	0	hcd	380.17	20557	131.145	20290.9	0	0	0	0	0	0	0	0	0	51.39	20290.9	0											59.02											48202
0	7820	0	hcd	669.33	34180.5	131.144	33849.3	0	0	0	0	0	0	0	0	1158.29	959.37	33849.3	0									2.6		73.67									33000		48502
0	7821	0	hcd	465.29	29031.2	131.144	28982.3	0	0	0	0	0	0	0	0	986.25	470.46	28982.3	0									2.64		74.01									31900		48206
0	7822	1	hcd	386.97	72675.9	131.145	72290.1	0	0	0	0	0	0	0	0	2993.3	2131.64	72290.1	0									8.16		181.28									49100		49002
0	7824	0	hcd	492.23	23357.1	131.145	23272.2	0	0	0	0	0	0	0	0	0	1132.35	23272.2	0										2.83	58.1										67200	48102
0	7825	0	hcd	526.92	31060.8	131.145	30816	0	0	0	0	0	0	0	0	0	339.24	30816	0											72.14											48606
0	7828	0	hcd	502.5	365346	131.144	363050	0	0	0	0	0	0	0	0	14080.6	9655.82	363050	0									8.84		214.64									44900		49402
0	7829	0	hcd	495.59	120783	131.144	118430	0	0	0	0	0	0	0	189.05	4869.52	4930.51	118430	0									11.94		287.02									44700		49402
0	7830	0	hcd	454.38	76688.4	131.144	76321.6	0	0	0	0	0	0	0	0	2091.82	1927.73	76321.6	0									5.44		193.03									33500		49202
0	7831	1	hcd	413.72	173644	131.144	172819	0	0	0	0	0	0	0	0	5707.63	2273.75	172819	0									14.63		436.82									45200		49402
0	7833	0	hcd	333.51	13695.5	131.144	13567.2	0	0	0	0	0	0	0	0	0	853.9	13567.2	0										2.66	42.57										61700	48302
0	7834	0	hcd	706.97	13925.5	131.144	13846.7	0	0	0	0	0	0	0	0	0	0	13846.7	0											27.84											47502
0	7835	1	hcd	339.94	56237.7	170.124	43211.4	0	465.27	0	0	0	0	0	0	902.8	1442.07	43211.4	0		1.38							2.76	4.24	125.26		36500							33100	77900	49002
0	7836	0	hcd	349.82	35706.1	286.151	20749.2	0	0	0	0	0	0	0	0	948.19	531.74	20749.2	0									2.81		61.72									34100		48702
0	7837	1	hcd	458.55	74522.7	131.144	73136.7	0	0	0	0	0	0	0	0	1864.58	3154.24	73136.7	0									4.87		187.51									35100		49402
0	7840	0	hcd	380.88	42255.1	131.144	42098.1	0	0	0	0	0	0	0	0	1137.56	865.75	42098.1	0									3.5		122.8									33800		48902
0	7841	0	hcd	527.75	51956.6	131.144	51881.3	0	0	0	0	0	0	0	0	0	1201.73	51881.3	0											127.76											48902
0	7842	0	hcd	687.32	98059.3	638.327	25240.7	0	0	0	0	0	0	0	0	0	342.06	25240.7	0											52.92											47602
0	7843	0	hcd	396.21	35121.9	131.144	35026.4	0	0	0	0	0	0	0	0	633.71	720.66	35026.4	0									1.8		98.25									34800		48502
0	7844	1	hcd	647.63	91570.6	131.144	91436.2	0	0	0	0	0	0	0	0	2020.03	2351.47	91436.2	0									4.17		178.79									36200		49102
0	7845	0	hcd	587.24	15701	258.145	14384	0	0	0	0	0	0	0	0	0	316.05	14384	0											32.51											47202
0	7846	0	hcd	603.26	11174.4	131.144	11042.9	0	0	0	0	0	0	0	0	0	0	11042.9	0											25.53											47602
0	7847	0	hcd	515.95	32771.4	131.144	32519.9	0	0	0	0	0	0	0	0	769.4	969.38	32519.9	0									1.86		77.35									36200		48802
0	7849	0	hcd	707.31	10105.6	131.145	10071.7	0	0	0	0	0	0	0	0	0	445.53	10071.7	0											21.33											46402
0	7850	0	hcd	640.63	14863.7	131.144	14859	0	0	0	0	0	0	0	0	0	218.47	14859	0											32.56											47102
0	7851	1	hcd	426.21	427427	131.144	426922	0	0	0	0	0	0	0	1369.32	23748.1	11740.3	426922	0									14.22		242.83									44900		49202
0	7852	0	hcd	431.54	143047	131.144	142729	0	0	0	0	0	0	0	0	7004.22	4052.42	142729	0									16.58		317.67									45802		49302
0	7853	0	hcd	403.56	74326.2	131.145	74003	0	0	0	0	0	0	0	0	3337.99	2361.5	74003	0									8.71		188.99									49300		49202
0	7855	0	hcd	522.87	562467	248.187	313200	0	0	0	0	0	0	0	0	14307.7	5017.4	313200	0									20.04		436.84									47002		49402
0	7856	0	hcd	632.75	96083.2	131.144	95427	0	0	0	0	0	0	0	0	4089.24	3344.46	95427	0									8.21		183.65									49200		49102
0	7858	0	hcd	352.17	68865.6	131.144	68847.9	0	0	0	0	0	0	0	0	1817.55	1582.97	68847.9	0									5.6		200.97									36500		49102
0	7859	0	hcd	547.23	54813.1	131.144	54811.1	0	0	0	0	0	0	0	0	1487.34	1081.34	54811.1	0									3.66		127.26									34100		48602
0	7860	1	hcd	630.25	46213.1	131.144	46130.4	0	0	0	0	0	0	0	0	856.22	965.24	46130.4	0									1.91		98.13									34800		48802
0	7861	0	hcd	493.57	40758.6	131.144	40700.8	0	0	0	0	0	0	0	0	1068.36	835.74	40700.8	0									2.8		102.8									33400		48402
0	7862	0	hcd	321.88	57747.7	131.144	57206.7	0	0	0	0	0	0	0	0	2386.62	1954.28	57206.7	0									7.03		167.19									44400		49102
0	7865	0	hcd	485.24	273616	569.341	130871	0	0	0	0	0	0	0	0	2707.03	2473.47	130871	0									2.61		119.11									33600		48602
0	7866	0	hcd	471.77	437668	587.378	361122	0	0	0	0	0	0	0	0	10586.4	11111.3	361122	0									13.13		415.53									46100		49402
0	7867	0	hcd	406.95	61487.5	131.145	61223.5	0	0	0	0	0	0	0	0	2782.27	1805.79	61223.5	0									7.6		154.46									50100		49102
0	7869	0	hcd	575.58	13344.5	131.144	13241.9	0	0	0	0	0	0	0	0	0	89.7	13241.9	0											32.21											47602
0	7870	0	hcd	461.23	65248.1	131.144	65226.8	0	0	0	0	0	0	0	0	1633.77	824.09	65226.8	0									3.13		121.3									33800		48602
0	7871	0	hcd	395.69	40679.7	131.144	40448.2	0	0	0	0	0	0	0	0	873.61	1267.5	40448.2	0									2.38		107.89									34800		48802
0	7873	0	hcd	336.22	79708.7	131.144	79661.5	0	0	0	0	0	0	0	0	727.37	1603.54	79661.5	0									2.16		234.49									33300		48902
0	7874	0	hcd	498.97	31679.2	131.144	31565.5	0	0	0	0	0	0	0	0	1041.25	908.43	31565.5	0									2.6		78.06									34200		48802
0	7875	0	hcd	588.2	15712	131.144	15423.5	0	0	0	0	0	0	0	0	0	614.49	15423.5	0										1.5	34.42										50500	47602
0	7878	0	hcd	343.87	96626	131.144	96591.8	0	0	0	0	0	0	0	106.2	3713.19	2301.8	96591.8	0									11.05		274.55									46000		49102
0	7879	0	hcd	403.23	47123.2	131.144	47113.4	0	0	0	0	0	0	0	0	1479.88	873.21	47113.4	0									4.19		125.62									33800		48502
0	7880	0	hcd	321.83	54148.4	131.144	54089.7	0	0	0	0	0	0	0	0	2706.3	1142.85	54089.7	0									8.61		164.56									48300		48702
0	7881	0	hcd	442.9	60345.2	131.144	60303.3	0	0	0	0	0	0	0	0	1919.91	1121.47	60303.3	0									5.23		162.78									35000		48802
0	7882	0	hcd	324.7	30002.7	131.144	29694.2	0	0	0	0	0	0	0	0	587.83	973.54	29694.2	0									1.77		87.32									33700		48802
0	7885	0	hcd	493.24	51166.2	131.145	51159.2	0	0	0	0	0	0	0	0	1347.85	1775.62	51159.2	0									3.52	4.64	130.54									34700	78500	48602
0	7886	0	hcd	540.22	96451.2	315.672	56495.3	0	0	0	0	0	0	0	0	1407.97	1374.52	56495.3	0									3.23		130.2									33800		49002
0	7887	0	hcd	659.79	19581.4	131.144	19283.4	0	0	0	0	0	0	0	0	0	1031.6	19283.4	0										2.12	39.88										56600	47502
0	7889	0	hcd	487.51	159475	131.144	159473	0	0	0	0	0	0	0	0	3371.05	3161.82	159473	0									4.91		226.37									33000		48902
0	7890	0	hcd	314.85	54018.1	225.043	25251.8	0	0	0	0	0	0	0	0	0	458.45	25251.8	0											74.79											48402
0	7891	1	hcd	382.88	43180.5	131.144	43094.6	0	0	0	0	0	0	0	0	1129.25	1031.65	43094.6	0									3.45		126.76									33300		48802
0	7892	0	hcd	458.81	33782.8	131.145	33594.5	0	0	0	0	0	0	0	0	731.22	1000.17	33594.5	0									1.81		78.98									35200		48602
0	7894	0	hcd	358.07	24228.1	131.145	24214.7	0	0	0	0	0	0	0	0	833.06	427.93	24214.7	0									2.51		71.79									35700		48206
0	7895	0	hcd	699.79	9256.67	789.384	3551.31	0	0	0	0	0	0	0	0	0	0	3551.31	0											7.09											45804
0	7898	0	hcd	530.23	189321	248.187	148848	0	0	0	0	0	0	0	0	3182.09	3745.77	148848	0									4.77		215.44									35600		49002
0	7899	0	hcd	550.9	74962.6	131.145	74916.1	0	0	0	0	0	0	0	0	3688.37	1792.52	74916.1	0									8.8		165.64									49400		48802
0	7900	0	hcd	512.89	52625.4	131.144	52238.3	0	0	0	0	0	0	0	0	1684.43	1422.56	52238.3	0									3.97		122.3									34100		49002
0	7903	0	hcd	492.83	81081.8	248.187	40060.9	0	0	0	0	0	0	0	0	1586.31	1510.92	40060.9	0									4.11	3.97	100.69									34300	72800	49102
0	7904	0	hcd	569.26	36808.2	131.144	36698.9	0	0	0	0	0	0	0	0	1060.67	847.67	36698.9	0									2.56		85.52									33300		48402
0	7905	0	hcd	616.04	48392	248.187	27713.4	0	0	0	0	0	0	0	0	0	547.26	27713.4	0											59.61											48402
0	7906	0	hcd	331.87	53111	131.144	52808.8	0	0	0	0	0	0	0	0	1564.03	1185.49	52808.8	0									4.76		159.04									34000		49002
0	7907	0	hcd	515.3	59937.4	131.144	59441	0	0	0	0	0	0	0	0	1211.64	2023.08	59441	0									2.99		145.67									34400		49302
0	7909	0	hcd	558.15	23233.9	131.145	23232.4	0	0	0	0	0	0	0	0	0	250.43	23232.4	0											57.21											48102
0	7910	0	hcd	440.14	25604.5	131.145	25383.5	0	0	0	0	0	0	0	0	512.25	816.64	25383.5	0									1.28		64.23									30800		48402
0	7913	0	hcd	448.25	212010	131.145	211955	0	0	0	0	0	0	0	0	8040.68	5098.89	211955	0									14.19		361.39									45900		49202
0	7914	0	hcd	368.52	244715	266.695	115525	0	0	0	0	0	0	0	0	1723.35	3318.22	115525	0									4.78		310.77									35600		49202
0	7915	0	hcd	364.55	50863.1	131.144	50660.7	0	0	0	0	0	0	0	0	2817.86	1394.05	50660.7	0									8.52		149.67									49000		48802
0	7916	0	hcd	656.3	7797.09	131.144	7637.26	0	0	0	0	0	0	0	0	0	341.4	7637.26	0											15.9											46402
0	7918	0	hcd	347	30745.5	131.144	30616.7	0	0	0	0	0	0	0	0	1009.41	683.72	30616.7	0									3.19		93.86									31900		48602
0	7919	0	hcd	726.96	7366.55	131.144	7311.25	0	0	0	0	0	0	0	0	0	401.47	7311.25	0											14.97											46300
0	7920	0	hcd	582.75	94699.1	418.717	80379.4	0	0	0	0	0	0	0	0	1975.58	1947.02	80379.4	0									4.52		175.58									34600		49102
0	7921	0	hcd	347.2	25285.2	131.145	24996.6	0	0	0	0	0	0	0	0	0	610.07	24996.6	0											71.16											48402
0	7924	0	hcd	596.54	47555.8	131.144	47551.8	0	0	0	0	0	0	0	0	1088.41	624.05	47551.8	0									2.56		106.2									34300		48502
0	7925	0	hcd	587.95	14128.9	131.145	14128.8	0	0	0	0	0	0	0	0	0	36.36	14128.8	0											33.79											47302
0	7926	0	hcd	697.44	7648.48	131.144	7549.9	0	0	0	0	0	0	0	0	0	0	7549.9	0											15.4											44202
0	7928	0	hcd	643.64	14904.7	131.145	14902	0	0	0	0	0	0	0	0	0	182	14902	0											31.26											47602
0	7929	0	hcd	632.97	21346.6	131.145	21308.2	0	0	0	0	0	0	0	0	679.56	1080.64	21308.2	0									1.63	2.52	49.29									33300	65100	47906
0	7930	1	hcd	408.71	116127	149.023	95164	0	0	0	0	0	0	0	0	4137.04	2129.39	95164	0									9.63		217.33									45600		49102
0	7931	0	hcd	626.29	44265.7	131.144	44235.1	0	0	0	0	0	0	0	0	1864.98	991.01	44235.1	0									4.4		100.54									35100		48702
0	7932	0	hcd	585.94	27897.7	131.144	27672.5	0	0	0	0	0	0	0	0	1026.4	865.96	27672.5	0									2.4		63.56									32800		48602
0	7934	0	hcd	684.2	21405	359.028	5116.13	0	0	0	0	0	0	0	0	0	0	5116.13	0											11.32											45300
0	7935	0	hcd	335.17	55093.6	149.023	19948.5	0	0	0	0	0	0	0	0	865.9	183.38	19948.5	0									2.64		59.97									33800		48302
0	7936	0	hcd	388.84	257995	356.07	76319.9	0	0	0	0	0	0	0	0	1214.61	1643.92	76319.9	0									1.86		115.25									33800		48502
0	7937	0	hcd	600.24	26403.4	693.32	22395.7	0	0	0	0	0	0	0	0	0	964.27	22395.7	0										2.12	46.48										62400	47802
0	7939	0	hcd	365.73	44372.1	131.144	44282.2	0	0	0	0	0	0	0	0	847.18	887.89	44282.2	0									2.64		130.86									34800		48902
0	7940	0	hcd	359.21	35557.2	131.144	35524	0	0	0	0	0	0	0	0	798.52	755.87	35524	0									2.42		105.62									33500		48702
0	7941	0	hcd	400.5	31796.1	131.145	31770.4	0	0	0	0	0	0	0	0	1014.81	597.24	31770.4	0									3.04		91.19									33200		48802
0	7942	0	hcd	548.54	35975.2	131.144	35972.6	0	0	0	0	0	0	0	0	0	540.09	35972.6	0											81.48											48602
0	7943	0	hcd	336.18	41042.2	131.144	40920.8	0	0	0	0	0	0	0	0	1179.93	1123.94	40920.8	0									3.43		117.93									33900		49002
0	7946	1	hcd	544.95	75496.6	131.144	75481.6	0	0	0	0	0	0	0	0	1749.38	1543.57	75481.6	0									4.32		179.54									33400		49002
0	7947	0	hcd	329.01	84520.6	174.992	37520.5	0	0	0	0	0	0	0	0	1356.42	909.8	37520.5	0									4		107.59									33700		48602
0	7948	0	hcd	579.77	11114	131.144	11112.4	0	0	0	0	0	0	0	0	0	650.98	11112.4	0										1.54	25.96										37900	47002
0	7949	0	hcd	399.17	44807.8	131.144	44326.7	0	0	0	0	0	0	0	0	1502.01	1724.73	44326.7	0									4.04		117.24									32100		49302
0	7951	0	hcd	573.51	22148.7	131.144	22137.6	0	0	0	0	0	0	0	0	0	226.04	22137.6	0											51.52											48006
0	7952	0	hcd	350.21	28098.8	131.144	28090.7	0	0	0	0	0	0	0	0	867.48	432.34	28090.7	0									2.62		82.85									33700		48502
0	7953	0	hcd	406.46	30630.2	131.144	30580.7	0	0	0	0	0	0	0	0	831.69	605.34	30580.7	0									2.46		85.38									34900		48802
0	7954	0	hcd	504.84	42712.3	418.995	25561.3	0	0	0	0	0	0	0	0	0	362.96	25561.3	0											63.56											48302
0	7955	1	hcd	323.85	21232.6	131.144	21085.5	0	0	0	0	0	0	0	0	586.17	594.74	21085.5	0									1.75		61.02									34000		48502
0	7957	0	hcd	548.26	36954.4	131.144	36891.1	0	0	0	0	0	0	0	0	737.3	729.69	36891.1	0									1.83		86.48									32200		48302
0	7958	0	hcd	415.24	116143	131.144	115872	0	0	0	0	0	0	0	203.76	5194.45	2901.99	115872	0									13.94		295.15									45200		49302
0	7959	0	hcd	711.76	10369.1	131.144	9907.53	0	0	0	0	0	0	0	0	0	565.76	9907.53	0											19.8											46602
0	7962	1	hcd	435.22	188306	131.144	188278	0	0	0	0	0	0	0	0	8345.74	4554.41	188278	0									19.26		414.07									45802		49202
0	7963	0	hcd	413.36	48234.7	413.266	43102.7	0	0	0	0	0	0	0	0	1318.14	901.73	43102.7	0									3.73		118.91									33100		48902
0	7964	1	hcd	515.24	107864	131.144	107350	0	0	0	0	0	0	0	0	2209.39	3413.26	107350	0									5.2		247.63									34600		49102
0	7966	0	hcd	362.22	153960	131.145	153850	0	0	0	0	0	0	0	423.77	6655.81	4164.15	153850	0									18.53		402.91									46802		49402
0	7967	0	hcd	511.65	36528	131.145	36398.2	0	0	0	0	0	0	0	0	680.86	770.07	36398.2	0									1.7		88.48									35100		48702
0	7968	0	hcd	610.93	50183.2	355.07	45901.9	0	0	0	0	0	0	0	0	1285.31	1058.46	45901.9	0									2.91		99.37									31700		48802
0	7969	0	hcd	736.25	8104.94	598.29	1705.39	0	0	0	0	0	0	0	0	0	0	1705.39	0											3.39											35800
0	7970	0	hcd	697.69	8456.13	131.144	8412.61	0	0	0	0	0	0	0	0	0	0	8412.61	0											16.84											45502
0	7973	0	hcd	400.92	45007.5	131.144	44990.8	0	0	0	0	0	0	0	0	1689.49	524.38	44990.8	0									5		125.7									35900		48702
0	7974	0	hcd	394.23	264068	131.144	261032	0	0	0	0	0	0	0	0	9702.8	4226.45	261032	0									20.11		540.45									46802		49702
0	7975	0	hcd	346.42	27076.6	174.992	18031.4	0	0	0	0	0	0	0	0	464.76	340.41	18031.4	0									1.46		55.41									35200		48702
0	7976	0	hcd	450.16	15854.3	131.144	15723.9	0	0	0	0	0	0	0	0	0	602.64	15723.9	0										1.69	41.27										64400	48402
0	7979	0	hcd	553.62	39414.8	131.145	39407.4	0	0	0	0	0	0	0	0	1123.24	787.85	39407.4	0									2.67		91.31									35200		48502
0	7980	0	hcd	627.95	35579.5	131.144	35485.2	0	0	0	0	0	0	0	0	0	675.95	35485.2	0											75.9											48402
0	7981	0	hcd	482.73	22012	131.144	21730.6	0	0	0	0	0	0	0	0	0	604.36	21730.6	0											54.08											48202
0	7983	0	hcd	915.89	14563.3	866.903	10274.4	0	0	0	0	0	0	0	0	0	501.42	10274.4	0											17.71											46002
0	7984	1	hcd	439.96	40646.7	131.145	40616.3	0	0	0	0	0	0	0	0	1293.56	902.03	40616.3	0									3.52		104.79									32300		48602
0	7985	0	hcd	397.94	28140.8	131.145	28078.8	0	0	0	0	0	0	0	0	0	383.18	28078.8	0											76.09											48502
0	7986	0	hcd	728.29	4315.54	400.23	2381.67	0	0	0	0	0	0	0	0	0	0	2381.67	0											4.58											35500
0	7989	0	hcd	627.78	37687.2	131.144	37648.3	0	0	0	0	0	0	0	0	1041.61	688.85	37648.3	0									2.4		85.99									32200		48602
0	7990	0	hcd	653.09	29886.4	248.187	27242.2	0	0	0	0	0	0	0	0	0	357.94	27242.2	0											60.42											48102
0	7991	0	hcd	364.22	57680.6	131.144	57601.4	0	0	0	0	0	0	0	0	1199.34	1461.84	57601.4	0									3.64		170.55									34600		49102
0	7992	0	hcd	379.2	59274.5	131.144	59012.6	0	0	0	0	0	0	0	0	1094.11	1699.7	59012.6	0									3.23		169.07									33000		49202
0	7993	0	hcd	478.25	64100.6	131.144	63258.9	0	0	0	0	0	0	0	0	1456.28	2224.04	63258.9	0									3.54		146.82									34200		49002
0	7995	0	hcd	316.54	41754.5	131.144	41489.7	0	0	0	0	0	0	0	0	505.31	1151.85	41489.7	0									1.59		125.54									31300		48702
0	7996	0	hcd	623.58	11398.6	131.145	11365.3	0	0	0	0	0	0	0	0	0	361.22	11365.3	0											24.65											47102
0	7997	0	hcd	367.28	64419.4	131.144	64407.4	0	0	0	0	0	0	0	0	481.21	1586.47	64407.4	0									1.45		190.8									32100		49106
0	7998	0	hcd	477.03	30102.6	131.144	29956.1	0	0	0	0	0	0	0	0	1478.14	517.65	29956.1	0									3.72		75.64									34100		48502
0	7999	0	hcd	339.54	57835.6	131.144	57511.7	0	0	0	0	0	0	0	0	991.34	1838.59	57511.7	0									3.1		171.08									34000		49002
0	8002	0	hcd	421.54	58334.4	131.144	58050.1	0	0	0	0	0	0	0	0	1561.61	1388.45	58050.1	0									4.32		154.04									33500		49002
0	8003	0	hcd	505.09	46917.2	131.144	46376.5	0	0	0	0	0	0	0	0	1572.58	1404.31	46376.5	0									3.82		110.94									32900		48802
0	8006	0	hcd	423.95	60294.6	131.145	60254.7	0	0	0	0	0	0	0	203.46	4508.32	1212.2	60254.7	0									12.03		152.97									44800		48902
0	8007	0	hcd	442.46	37250.6	131.145	37240.9	0	0	0	0	0	0	0	0	846	851.54	37240.9	0									2.35		99.01									33600		48502
0	8008	0	hcd	585.7	24720.9	487.758	15068.5	0	0	0	0	0	0	0	0	0	408.19	15068.5	0											31.86											47602
0	8011	0	hcd	331.21	175750	131.145	173490	474.43	0	0	0	0	0	0	547.94	6782.51	2802.04	173490	0	1.4							1.6	19.6		496.44	34600							31800	47102		49502
0	8012	0	hcd	527.77	56989.7	131.144	56901.8	0	0	0	0	0	0	0	0	1475.3	1288.37	56901.8	0									3.6		134.39									34200		48902
0	8013	1	hcd	475.76	119582	131.144	119116	0	0	0	0	0	0	0	0	3139.99	3214.51	119116	0									8.1		293.31									49700		49402
0	8014	0	hcd	471.21	140419	131.145	140083	0	0	0	0	0	0	0	0	5598.38	4196.29	140083	0									8.67		198.99									49400		49202
0	8016	0	hcd	1091.93	9586.49	400.231	0	0	0	0	0	0	0	0	0	0	0	0	0
0	8017	0	hcd	382.54	39819.3	131.144	39754.4	0	0	0	0	0	0	0	0	0	873.33	39754.4	0											112.3											48802
0	8018	0	hcd	379.7	48947.5	131.145	48936.2	0	0	0	0	0	0	0	0	1487.15	921	48936.2	0									4.4		142.2									35300		48502
0	8019	0	hcd	733.97	4781.79	400.231	1571.55	0	0	0	0	0	0	0	0	0	0	1571.55	0											3.11											34800
0	8020	0	hcd	576.24	21225.8	131.144	20923.2	0	0	0	0	0	0	0	0	0	1056.02	20923.2	0										2.33	46.25										59500	48002
0	8023	0	hcd	311.87	1.09941e+06	131.145	1.08707e+06	0	0	0	0	0	0	0	0	43723.8	14816.7	1.08707e+06	0									38.06		942.73									48402		49702
0	8024	0	hcd	414.22	81405.1	523.304	42907.1	0	0	0	0	0	0	0	0	603.58	1586.48	42907.1	0									1.51	3.85	107.88									33800	70000	49002
0	8026	0	hcd	450.9	32669.6	131.144	32666.6	0	0	0	0	0	0	0	0	1198.23	491.76	32666.6	0									3.33		88.21									35600		48502
0	8027	0	hcd	427.72	52422.8	131.145	52386.3	0	0	0	0	0	0	0	0	1241.5	1191.35	52386.3	0									3.32		133.1									31100		48802
0	8028	0	hcd	398.97	23890.2	131.145	23514.7	0	0	0	0	0	0	0	0	772.5	909.07	23514.7	0									2.11		63.4									33600		48902
0	8030	0	hcd	544.49	45628.3	131.145	45623.6	0	0	0	0	0	0	0	0	1105.01	753.76	45623.6	0									2.81		108.85									33000		48502
0	8031	0	hcd	685.64	17240.9	359.028	13307.1	0	0	0	0	0	0	0	0	0	29.97	13307.1	0											27.46											47202
0	8032	0	hcd	589.58	73279.5	248.187	35829	0	0	0	0	0	0	0	0	0	911.83	35829	0											82.05											48302
0	8033	0	hcd	557.49	28034.7	272.171	26416.1	0	0	0	0	0	0	0	0	0	296.29	26416.1	0											58.84											48102
0	8034	0	hcd	615.76	49658.1	248.187	38816.8	0	0	0	0	0	0	0	0	0	1311.49	38816.8	0											78.92											48602
0	8037	0	hcd	684.97	25163	272.171	20667.2	0	0	0	0	0	0	0	0	0	297.3	20667.2	0											42.09											47702
0	8038	0	hcd	698.3	13458.3	131.145	13452.9	0	0	0	0	0	0	0	0	0	770.27	13452.9	0										1.64	27.96										35500	47502
0	8039	0	hcd	374.1	153825	288.006	53308.6	0	0	0	0	0	0	0	0	1580.07	1088.86	53308.6	0									3.79		124.64									32800		48702
0	8040	0	hcd	916.9	5032.77	867.404	2937.59	0	0	0	0	0	0	0	0	0	0	2937.59	0											5.07											35600
0	8041	0	hcd	729.39	11412.5	131.144	11090.6	0	0	0	0	0	0	0	0	0	516.72	11090.6	0											22.13											46502
0	8044	0	hcd	469.48	48463.1	131.144	48446.1	0	0	0	0	0	0	0	0	1252.32	1109.57	48446.1	0									3.2		120.73									34600		48602
0	8045	0	hcd	493.78	111233	131.144	111122	0	0	0	0	0	0	0	0	1638.03	2729.58	111122	0									4.21		275.92									33200		49202
0	8046	0	hcd	585.74	41594.8	131.144	41483.5	0	0	0	0	0	0	0	0	819.42	848.38	41483.5	0									1.76		88.03									34700		48502
0	8048	0	hcd	504.77	48714.1	131.144	48714.1	0	0	0	0	0	0	0	0	1209.89	855.95	48714.1	0									2.97		118.1									35700		48602
0	8049	0	hcd	514.23	30133.4	272.171	26164.3	0	0	0	0	0	477.83	600.72	0	0	507.6	26164.3	0							1.44				61.79							31900				48302
0	8052	0	hcd	605.5	25906.8	131.144	25905.2	0	0	0	0	0	0	0	0	0	0	25905.2	0											57.7											48306
0	8053	0	hcd	441.9	64542.3	131.144	64423.5	0	0	0	0	0	0	0	0	1915.44	1831.06	64423.5	0									5.38		173.52									37500		48902
0	8054	0	hcd	381.73	38282.8	131.144	38112.1	0	0	0	0	0	0	0	0	1180.28	917.96	38112.1	0									3.49		107.94									33900		49102
0	8055	0	hcd	642.76	18334.3	131.144	18097.5	0	0	0	0	0	0	0	0	0	479.66	18097.5	0											37.35											48102
0	8057	0	hcd	352.18	74683.1	325.526	69570.2	0	0	0	0	0	0	0	0	3038.77	1549.36	69570.2	0									8.47		185.43									47800		48902
0	8058	0	hcd	346.52	19591.6	174.992	15066.2	579.96	0	0	0	0	0	0	0	0	125.89	15066.2	0	1.86										46.77	36300										47802
0	8059	0	hcd	625.3	12517.1	131.144	12516.5	0	0	0	0	0	0	0	0	0	587.52	12516.5	0										1.41	28.73										41400	46702
0	8060	0	hcd	687.26	15819.4	589.28	6245.11	0	0	0	0	0	0	0	0	0	316.9	6245.11	0											13.01											44700
0	8062	0	hcd	409.56	39476.6	409.243	35965.9	0	0	0	0	0	0	0	0	0	698.65	35965.9	0											85.87											48702
0	8063	0	hcd	695.07	11909.2	131.145	11860.1	0	0	0	0	0	0	0	0	0	577.73	11860.1	0											24.67											46702
0	8064	0	hcd	624.6	14247.2	239.095	7664.93	0	0	0	0	0	0	0	0	0	793.29	7664.93	0										1.78	17.18										33200	46102
0	8065	0	hcd	498.71	31025.8	131.144	30672.4	0	0	0	0	0	0	0	0	951.04	1001.37	30672.4	0									2.44		76.15									33400		48602
0	8067	0	hcd	570.23	38714.5	131.145	38692.9	0	0	0	0	0	0	0	0	866.52	831.27	38692.9	0									1.98		85.49									33000		48802
0	8068	0	hcd	516.26	42430.8	131.145	42261.8	0	0	0	0	0	543.21	0	0	701.46	810.97	42261.8	0						1.32			1.77		103.36						30900			33400		48702
0	8069	0	hcd	564.93	32852.2	553.346	16865.8	0	0	0	0	0	0	0	0	1456.51	252.62	16865.8	0									3.44		38									34300		48002
0	8070	0	hcd	488.97	47225.3	586.346	28024.4	0	0	0	0	0	0	0	0	754.83	1083.52	28024.4	0									1.9	2.68	67.98									31500	74000	48602
0	8071	0	hcd	649.8	51648.1	131.145	50774.2	0	0	0	0	0	0	0	0	1217.96	1853.1	50774.2	0									2.58	3.57	104.97									33700	69900	48902
0	8074	0	hcd	646.65	236297	131.144	235072	0	0	0	0	0	0	0	1209.56	16275.3	7329.23	235072	0								1.16	16.69		225.58								25200	45902		49102
0	8075	0	hcd	506.27	54102.6	786.421	33520.1	0	0	0	0	0	0	0	0	0	538.95	33520.1	0											81.07											48502
0	8076	0	hcd	424.39	198332	248.187	186310	0	0	0	0	0	0	0	0	3325.67	5200.65	186310	0									3.06		162.54									33100		49002
0	8077	0	hcd	620.82	30146.2	571.83	20536.3	0	0	0	0	0	0	0	0	0	293.25	20536.3	0											45.88											47902
0	8078	0	hcd	367.85	38772.1	456.256	33187.4	0	0	0	0	0	0	0	0	1058.29	1141.23	33187.4	0									2.98		90.88									34500		48702
0	8080	0	hcd	480.5	46619.4	131.145	46359.1	0	0	0	0	0	0	0	0	1603.43	975.05	46359.1	0									4.2		117.06									32300		48902
0	8081	0	hcd	545.51	35553.4	131.145	35420.2	0	0	0	0	0	0	0	0	784.74	727.63	35420.2	0									1.98		85.31									34700		48702
0	8082	0	hcd	386.23	166347	248.187	114479	0	0	0	0	0	0	0	0	4413.76	2951.17	114479	0									10.04		250.34									46100		49202
0	8083	0	hcd	579.9	17801	272.171	9341.47	0	0	0	0	0	0	0	0	0	569.5	9341.47	0										1.38	22.57										36600	47002
0	8084	0	hcd	798.36	9601.06	1075.5	1221.15	0	0	0	0	0	0	0	0	0	0	1221.15	0											2.25											33000
0	8087	0	hcd	436.61	92372.6	131.145	92064.1	0	0	0	0	0	0	0	0	1907.13	2681.64	92064.1	0									4.59		216.36									34600		49002
0	8088	0	hcd	496.6	98005.1	131.145	97598.3	0	0	0	0	0	0	0	0	1625.94	2406.08	97598.3	0									4.04		232.78									35000		49402
0	8089	0	hcd	378.56	457021	131.144	456771	0	0	0	0	0	0	0	0	18383.7	4322.54	456771	0									24.11		579.49									47402		49206
0	8092	0	hcd	479.22	25690.9	131.145	25460.6	0	0	0	0	0	0	0	0	0	552.85	25460.6	0											64.31											48602
0	8093	0	hcd	340.55	65508.4	131.145	65133.9	0	0	0	0	0	0	0	0	1176.03	1755.7	65133.9	0									3.72		197.9									32400		49002
0	8094	0	hcd	404.21	59129.2	248.187	44451.9	0	0	0	0	0	0	0	0	1093.95	985.46	44451.9	0									3.3		126.67									33900		49202
0	8095	0	hcd	438.43	51500.7	131.145	50429.6	0	0	0	0	0	0	0	0	1177.53	1169.02	50429.6	0									3.03		127.17									34200		49102
0	8098	0	hcd	473.19	38413.2	131.145	38171.3	0	0	0	0	0	0	0	0	1566.53	1092.91	38171.3	0									4.14		96.6									34200		48602
0	8099	0	hcd	380.72	66015.8	131.145	65597.3	0	0	0	0	0	0	0	0	2949.92	1798.45	65597.3	0									8.66		181.49									48200		49302
0	8100	0	hcd	430.24	154617	131.145	153666	0	0	0	0	0	0	0	0	5975.4	4753.95	153666	0									16.09		397.24									45802		49502
0	8101	0	hcd	359.18	26993.2	131.145	26577.3	0	0	0	0	0	0	0	0	686.13	924.69	26577.3	0									2.02	2.72	79.04									32200	70700	48702
0	8103	0	hcd	501.64	65509.1	131.145	65509.1	0	0	0	0	0	0	0	0	3589.73	1892.42	65509.1	0									9.21		158.39									45300		49002
0	8104	0	hcd	368.71	72982	131.145	72762.6	0	0	0	0	0	0	0	0	1117.95	1698.55	72762.6	0									3.24		204.55									35600		49102
0	8105	0	hcd	600.77	21640	131.144	21303.6	0	0	0	0	0	0	0	0	0	554.1	21303.6	0											46.57											47802
0	8107	0	hcd	637.76	72031	272.171	26325.2	0	0	0	0	0	0	0	0	966.2	1172.48	26325.2	0									2.04	2.43	54.18									32200	69800	48102
0	8108	0	hcd	475.91	60031.8	131.144	59502.2	0	0	0	0	0	0	0	0	1364.92	2089.25	59502.2	0									3.35		141.02									33800		49302
0	8111	0	hcd	321.54	58426.9	131.145	58348.2	0	0	0	0	0	0	0	0	1506.37	1340.68	58348.2	0									4.89		184.82									35000		49102
0	8112	0	hcd	567.29	82125.8	131.145	81997.5	0	0	0	0	0	0	0	0	1912.8	2087.32	81997.5	0									4.6		193.25									35600		49002
0	8113	0	hcd	470.56	28570.9	131.145	28332.5	0	0	0	0	0	0	0	0	534.91	952.46	28332.5	0									1.35		71.31									31100		48702
0	8116	0	hcd	307.2	296261	307.196	125159	0	0	0	0	0	0	0	0	0	3939.58	125159	0											364.22											49302
0	8117	0	hcd	694.57	20663.6	131.145	20611.3	0	0	0	0	0	0	0	0	0	226.53	20611.3	0											45.19											48402
0	8118	0	hcd	557.75	100302	508.762	26806	0	0	0	0	0	0	0	0	903.21	615.7	26806	0									2.06		60.14									36300		48302
0	8120	0	hcd	543	49277.7	131.144	49269.4	0	0	0	0	0	0	0	929.78	1130.63	694.28	49269.4	0								2.23	2.72		116.47								35400	35200		48602
0	8121	0	hcd	358.53	85375.2	131.145	85261.7	0	0	0	0	0	0	0	0	3011.1	2027.01	85261.7	0									8.86		229.55									49800		49102
0	8122	0	hcd	551.26	27994.8	131.145	27992.6	0	0	0	0	0	0	0	0	794.29	512.6	27992.6	0									1.89		66.01									33700		48402
0	8123	0	hcd	609.29	39177.5	131.145	38756.1	0	0	0	0	0	0	0	0	664.96	1207.65	38756.1	0									1.44		83.96									33600		48602
0	8126	1	hcd	468.91	113534	312.178	111714	0	0	0	0	0	0	0	0	1302.58	2404.39	111714	0									2.57		213.32									34600		49202
0	8127	0	hcd	561.49	34119.1	131.145	34114.9	0	0	0	0	0	0	0	0	976.21	604.8	34114.9	0									2.22		76.87									33500		48306
0	8128	1	hcd	463.22	124087	360.029	84963.2	0	0	0	0	0	0	0	0	4610.3	1861.51	84963.2	0									8.82		153.85									44800		49002
0	8129	0	hcd	396.85	70711.8	354.196	59229.3	0	0	0	0	0	0	0	0	1557.66	1364.92	59229.3	0									4.23		155.62									33800		48902
0	8130	0	hcd	626.55	16000.3	131.145	15946	0	0	0	0	0	0	0	0	0	186.75	15946	0											36.16											47502
0	8131	0	hcd	656.57	14599.9	131.144	14590.5	0	0	0	0	0	0	0	0	0	17.52	14590.5	0											31.47											47202
0	8132	0	hcd	650	19500.1	131.145	19385.1	0	0	0	0	0	0	0	0	966.72	1036.61	19385.1	0									2.07	2.18	40.2									31600	58100	48302
0	8134	0	hcd	653.97	20123	131.145	19964.3	0	0	0	0	0	0	0	0	0	1041.45	19964.3	0										2.21	42.43										60800	47902
0	8135	0	hcd	347.86	17078.2	131.144	17072	0	0	0	0	0	0	0	0	548.81	1086.14	17072	0									1.72	3.27	51.17									31000	68100	48002
0	8136	0	hcd	490.73	41486.1	131.145	41290.4	0	0	0	0	0	0	0	0	817.79	1143.6	41290.4	0									1.94		97.4									32900		49002
0	8139	0	hcd	491.27	40667.9	131.145	40608.1	0	0	0	0	0	0	0	0	0	900.19	40608.1	0											102.56											48902
0	8140	0	hcd	703.32	15468.6	232.14	14800.9	0	0	0	0	0	0	0	0	0	86.25	14800.9	0											30.3											47202
0	8141	0	hcd	351.93	26225.1	131.145	26201.9	0	0	0	0	0	0	0	0	468.81	449.13	26201.9	0									1.42		78.35									33600		48402
0	8142	1	hcd	474.55	35457.5	131.145	35303.8	0	0	0	0	0	0	0	0	697.5	1007.07	35303.8	0									1.75		85.81									33200		48602
0	8145	0	hcd	511.69	29714.4	131.145	29708.6	0	0	0	0	0	0	0	0	0	377.43	29708.6	0											64.06											48402
0	8146	0	hcd	555.86	27837.6	131.145	27833.6	0	0	0	0	0	0	0	0	1293.57	145.46	27833.6	0									2.91		60.87									33800		47902
0	8147	0	hcd	432.89	37725.6	131.145	37565.8	0	0	0	0	0	0	0	0	996.34	933.23	37565.8	0									2.67		97.86									34000		48602
0	8150	0	hcd	414.47	261025	131.145	260999	0	0	0	0	0	0	0	0	8225.86	6200.02	260999	0									11.6		362.87									44800		49102
0	8151	0	hcd	602.27	24670.4	131.144	24248.1	0	0	0	0	0	0	0	0	767.52	922.1	24248.1	0									1.72		53.65									33700		48002
0	8153	0	hcd	489.24	108608	131.145	108608	0	0	0	0	0	0	0	0	3974.33	3027.3	108608	0									10.03		265.15									45200		49302
0	8154	0	hcd	606.17	21572.8	131.145	21463.7	0	0	0	0	0	0	0	0	610.73	338.53	21463.7	0									1.38		48.01									32800		48202
0	8155	0	hcd	630.27	54991.7	131.144	54632.9	0	0	0	0	0	0	0	0	0	1230.21	54632.9	0											118.6											48802
0	8156	0	hcd	454.38	74116.1	131.145	73765.8	0	0	0	0	0	0	0	0	1313.24	2733.86	73765.8	0									3.11		167.29									33000		49102
0	8158	0	hcd	577.02	14892.7	131.144	14804.9	0	0	0	0	0	0	0	0	626.25	160.26	14804.9	0									1.41		33.51									30500		47302
0	8159	0	hcd	560.8	69422.7	131.145	69110.9	0	0	0	0	0	0	0	0	1073.62	2499.35	69110.9	0									2.46		150.96									33900		49202
0	8160	0	hcd	586.6	31751.2	131.144	31664.3	0	0	0	0	0	0	0	0	790.19	524.54	31664.3	0									1.84		71.07									33400		48402
0	8161	0	hcd	426.03	119272	131.144	119202	0	0	0	0	0	0	0	0	2337.61	2724.49	119202	0									4.45		220.05									34200		49002
0	8162	0	hcd	560.25	77410.9	272.171	65588.8	0	0	0	0	0	0	0	0	1209.27	2114.76	65588.8	0									2.76		147.54									34500		49102
0	8164	0	hcd	494.97	35197.1	131.145	35178.3	0	0	0	0	0	0	0	0	1172.85	735.41	35178.3	0									2.99		88.02									34000		48202
0	8165	0	hcd	711.33	48382.4	312.178	27668.3	0	0	0	0	0	0	0	0	750.58	1397.84	27668.3	0									1.54	2.79	54.98									35000	71000	48202
0	8166	0	hcd	477.59	54245.6	131.144	53984.7	0	0	0	0	0	0	0	0	1413.87	1262.8	53984.7	0									3.72		138.92									35000		49102
0	8167	0	hcd	482.25	97126	131.145	96175.7	0	0	0	0	0	0	0	0	3241.38	3660.77	96175.7	0									8.39		236.29									49200		49202
0	8169	0	hcd	706.64	77602.7	131.145	77349.2	0	0	0	0	0	0	0	0	1595.47	1424.4	77349.2	0									3.18		150.25									34900		48902
0	8170	0	hcd	551.96	27180.2	131.145	27148.1	0	0	0	0	0	0	0	0	653.86	539.54	27148.1	0									1.67		66.72									32700		48302
0	8171	0	hcd	608.28	40647.8	131.145	40631.5	0	0	0	0	0	0	0	0	770.61	948.8	40631.5	0									1.74		86.44									31400		48802
0	8172	0	hcd	702.85	13831.4	312.178	12666.8	0	0	0	0	0	0	0	0	0	448.16	12666.8	0											25.18											47002
0	8174	0	hcd	522.87	211879	248.187	142625	0	0	0	0	0	0	0	0	4456.06	3559.4	142625	0									10.3		314.3									45600		49002
0	8175	0	hcd	633.3	23608.8	131.145	23607.5	0	0	0	0	0	0	0	0	672.44	336.86	23607.5	0									1.47		51.11									33800		47902
0	8176	0	hcd	664.3	27939.2	131.144	27535.2	0	0	0	0	0	0	0	0	0	734.71	27535.2	0											56.61											48602
0	8179	0	hcd	485.24	4949761	569.34	2.83678e+06	0	0	0	0	0	0	0	0	78794.6	55001.7	2.83678e+06	0									3.25		111.33									33400		48402
0	8180	0	hcd	541.62	62919.2	131.144	62667.1	0	0	0	0	0	0	0	0	1977.56	1711.92	62667.1	0									4.92		150.53									34200		49302
0	8181	1	hcd	341.38	83072.9	131.144	82531.3	0	0	0	0	0	0	0	0	1581.03	2812.24	82531.3	0									4.42		221.82									35700		49302
0	8184	0	hcd	388.59	837977	355.07	55393.5	0	0	0	0	0	0	0	820.04	1850.34	812.52	55393.5	0								1.21	2.77		80.58								29800	32300		48702
0	8185	0	hcd	345.22	85880.2	131.145	85534.9	0	0	0	0	0	0	0	0	5276.5	2313.96	85534.9	0									16.91		260.12									46802		49402
0	8186	0	hcd	545.91	38103.7	131.145	37531	0	0	0	0	0	0	0	0	1081.62	1288.61	37531	0									2.43	2.99	82.21									32500	71100	48802
0	8190	0	hcd	449.25	67527.9	131.145	67372.9	0	0	0	0	0	0	0	0	1943.98	1579.3	67372.9	0									5.07		168.98									37300		48802
0	8191	0	hcd	395.98	20817.8	131.145	20522.5	0	0	0	0	0	0	0	0	991.93	109.98	20522.5	0									2.76		55.95									35300		48002
0	8193	1	hcd	443.2	474088	372.209	392474	0	0	0	0	0	0	0	0	23138.7	10326.6	392474	0									12.71		207.05									45800		48902
0	8194	1	hcd	440.45	29918.6	131.145	29833	0	0	0	0	0	0	0	0	829.27	733.23	29833	0									2.32		81.93									34700		48302
0	8195	0	hcd	582.27	65922.7	131.145	65874	0	0	0	0	0	0	0	0	3604.64	1677.37	65874	0									8.72		150.5									50800		48802
0	8196	0	hcd	526.59	29051.3	131.145	28837.7	0	0	0	0	0	0	0	0	752.65	849.75	28837.7	0									1.84		68.82									32000		48302
0	8199	0	hcd	435.57	103564	131.145	103550	0	0	0	0	0	0	0	0	4468.5	2355.57	103550	0									11.81		262.11									44300		49202
0	8200	0	hcd	659.63	8908.6	131.145	8841.65	0	0	0	0	0	0	0	0	0	0	8841.65	0											19.42											46802
0	8201	0	hcd	654.64	16107.6	131.145	15981	0	0	0	0	0	0	0	0	0	924.42	15981	0										1.89	32.84										53300	47602
0	8204	0	hcd	405.19	283749	334.195	149713	0	0	0	0	0	0	0	0	3825.01	4100.95	149713	0									4.72		176.77									35200		49002
0	8205	0	hcd	487.51	88082.4	131.145	88082.4	0	0	0	0	0	0	0	0	1708.78	1606.83	88082.4	0									4.18		207.3									32700		48906
0	8206	0	hcd	600.25	26838.2	131.145	26435.4	0	0	0	0	0	0	0	0	0	874.53	26435.4	0											54.73											48402
0	8209	1	hcd	426.48	162002	131.145	161979	0	0	0	0	0	0	0	0	5791.59	3486.75	161979	0									13.41		359.95									45400		49206
0	8210	0	hcd	456.01	56197.6	248.187	52125	0	0	0	0	0	0	0	0	1451.38	1117	52125	0									3.76		129.07									34700		49102
0	8211	0	hcd	509.24	80036.4	131.145	79362.8	0	0	0	0	0	0	0	0	4445.49	2828	79362.8	0									11.07		186.97									45400		49302
0	8213	0	hcd	530.23	1076502	248.187	808364	0	0	0	0	0	0	0	0	39633.4	12312	808364	0									10.38		204.05									44600		49202
0	8216	0	hcd	576.79	47722.9	131.145	47554.7	0	0	0	0	0	0	0	0	1571.67	1369.25	47554.7	0									3.77		110.43									33200		48802
0	8217	0	hcd	589.99	24684.6	131.144	24416	0	0	0	0	0	0	0	0	0	800.55	24416	0										1.86	53.11										66700	48706
0	8219	0	hcd	969.47	8254.11	559.406	6394.05	0	0	0	0	0	0	0	0	0	0	6394.05	0											10.4											43800
0	8220	0	hcd	379.38	30558.9	131.145	30514.5	0	0	0	0	0	0	0	0	0	542.27	30514.5	0											85.6											48402
0	8221	0	hcd	659.96	10317.9	131.145	10180.4	0	0	0	0	0	0	0	0	0	0	10180.4	0											21.37											46202
0	8224	0	hcd	620.68	21874.8	131.145	21824	0	0	0	0	0	0	0	0	875.48	1309.13	21824	0									1.94	2.9	48.15									33700	66200	48402
0	8225	0	hcd	393.55	102127	149.024	54844.6	0	0	0	0	0	0	0	0	1604.37	1428.74	54844.6	0									4.5		146.36									33500		48902
0	8226	0	hcd	459.01	38423.4	131.145	38106.5	0	0	0	0	0	0	0	0	788.27	0	38106.5	0									2.09		96.72									34500		48802
0	8228	0	hcd	379.78	21706.6	131.145	21706.6	0	0	0	0	0	0	0	0	686.3	370.41	21706.6	0									2.07		63.09									32100		48306
0	8229	0	hcd	346.13	34045.9	174.992	30788.6	0	0	0	0	0	0	0	0	0	291.76	30788.6	0											86.66											48802
0	8232	0	hcd	630.59	24301.3	131.145	24265.4	0	0	0	0	0	0	0	0	0	462.69	24265.4	0											51.45											48106
0	8233	0	hcd	366.85	33612.9	131.145	32913.8	0	0	0	0	0	0	0	0	956.51	1332.26	32913.8	0									2.61	3.75	91.16									33200	68600	49002
0	8236	0	hcd	358.44	36051.4	131.145	35893.7	0	0	0	0	0	0	0	0	1545.07	831.75	35893.7	0									4.42		98.52									34300		48702
0	8237	0	hcd	776.1	24269.1	131.145	23962.7	0	0	0	0	0	0	0	0	0	1329.42	23962.7	0										2.49	44.52										51300	48002
0	8240	0	hcd	468.01	187928	131.145	187917	0	0	0	0	0	0	0	0	5604.18	2299.6	187917	0									9.98		324.73									45400		49302
0	8241	0	hcd	349.53	104763	376.282	86402.8	0	0	0	0	0	0	0	0	2897.81	558.17	86402.8	0									9.14		250.73									55800		49002
0	8242	0	hcd	430.89	49732.2	131.145	49675.9	0	0	445.62	0	0	0	0	0	1280.09	0	49675.9	0			1.25						3.71		135.09			31300						33400		49002
0	8243	0	hcd	492.83	35525.5	460.24	35227.5	0	0	0	0	0	0	0	0	1359.57	1242.28	35227.5	0									3.47	3.13	86.56									32700	74100	48802
0	8246	0	hcd	314.87	443855	131.144	442511	0	0	0	0	0	0	0	0	19562.5	6644.26	442511	0									31.66		705.06									48102		49502
0	8247	0	hcd	490.98	42213.5	131.145	41699.8	0	0	0	0	0	0	0	0	838.7	1314.62	41699.8	0									2.05		102.06									35500		48602
0	8250	0	hcd	536.17	155021	299.062	30673	0	0	0	0	0	0	0	0	652.6	821.6	30673	0									1.58		72.88									36000		48402
0	8251	0	hcd	506.89	38821.2	131.145	38408.6	0	0	0	0	0	0	0	0	643.55	1202.19	38408.6	0									1.63		96.61									34100		48802
0	8254	0	hcd	775.34	17660.4	131.145	17584.3	0	0	0	0	0	0	0	0	978.71	373.47	17584.3	0									1.95		34.24									35000		47702
0	8255	0	hcd	336.84	45951.4	131.145	45810.6	0	0	0	0	0	0	0	0	1169.5	1004.3	45810.6	0									3.69		137.61									34100		49002
0	8256	0	hcd	604.27	27196.9	892.364	19682.5	0	0	0	0	0	0	0	0	0	410.15	19682.5	0											41.27											47806
0	8260	0	hcd	549.75	17380.5	131.144	17086.7	0	0	0	0	0	0	0	0	0	292.22	17086.7	0											38.67											47702
0	8263	0	hcd	366.22	60655.9	131.144	60087.3	0	0	0	0	0	0	0	0	1245.16	1748.26	60087.3	0									3.73		178.16									33700		49202
0	8264	0	hcd	343.52	37201	174.992	37199.6	0	0	0	0	0	0	0	0	1166.08	745.67	37199.6	0									3.55		112.37									35300		48802
0	8265	0	hcd	352.21	48012.2	230.177	46871.6	0	0	0	0	0	0	0	0	859.37	1279.31	46871.6	0									2.44		129.29									33800		49002
0	8269	0	hcd	386.73	987778	547.346	330545	0	0	0	0	0	0	0	0	11818	10844.5	330545	0									9.71		256.41									45300		49502
0	8270	0	hcd	430.23	90531.9	131.145	89280.2	0	0	0	0	0	0	0	0	1581.71	3868.07	89280.2	0									4.38		237.17									33700		49502
0	8271	0	hcd	514.9	43843.8	131.145	43748.3	0	0	0	0	0	0	0	0	767.41	1034.11	43748.3	0									1.81		100.83									36500		48702
0	8272	0	hcd	690.78	7738.77	131.144	7501.09	0	0	0	0	0	0	0	0	0	0	7501.09	0											15.09											45102
0	8274	0	hcd	362.22	79436.1	131.144	79299.4	0	0	0	0	0	0	0	0	4316.07	1522.62	79299.4	0									12.81		228.04									45200		49002
0	8275	0	hcd	511.65	45969.4	131.145	45789.4	0	0	0	0	0	0	0	0	0	993.85	45789.4	0											112.46											48802
0	8276	0	hcd	413.16	43117.3	413.266	41116.3	0	0	0	0	0	0	0	0	1238.4	1224.09	41116.3	0									2.88		92.33									32500		48402
0	8278	0	hcd	472.91	75545.2	131.145	75226.3	0	0	0	0	0	0	0	0	2022.95	1936	75226.3	0									5.27		187.01									36400		49202
0	8279	0	hcd	457	65894.7	131.145	65237	0	0	0	0	0	0	0	0	1470.74	2436.18	65237	0									3.81		164.69									33100		49202
0	8283	0	hcd	415.55	69082.7	131.145	68693	0	0	0	0	0	0	0	0	1278.97	1850.05	68693	0									3.4		180.77									33800		49502
0	8284	0	hcd	459.88	46317.3	323.645	43895.5	0	0	0	0	0	0	0	0	1160.31	929.34	43895.5	0									3.12		111.58									34500		49002
0	8285	0	hcd	435.02	60886.9	131.145	60795.2	0	0	0	0	0	0	0	0	3860.03	1312.51	60795.2	0									10.62		156.81									45400		49002
0	8286	0	hcd	548.54	28880.4	131.145	28604.4	0	0	0	0	0	0	0	0	0	314.03	28604.4	0											67.26											48402
0	8288	0	hcd	684.71	28432.2	359.028	6956.83	0	0	0	0	0	0	0	0	0	0	6956.83	0											14.7											46200
0	8289	1	hcd	380.87	39277.8	131.145	39152.9	0	0	0	0	0	0	0	0	827.42	905.3	39152.9	0									2.44		113.17									35000		48802
0	8290	0	hcd	546.76	62311.7	248.187	49353.9	0	0	0	0	0	0	0	0	1470.91	1798.41	49353.9	0									3.64	4.32	117.67									34000	76200	49002
0	8291	0	hcd	322.7	15188.8	131.145	14790.9	0	0	0	0	0	0	0	0	612.12	622.23	14790.9	0									1.94	1.96	45.64									32100	56800	47806
0	8295	0	hcd	566.87	45844.2	131.144	45842.9	0	0	0	0	0	0	0	0	0	783.51	45842.9	0											104.32											48802
0	8296	0	hcd	516.87	36589.8	131.144	36476.4	0	0	0	0	0	0	0	0	679.14	1240.31	36476.4	0									1.72	3.04	87.08									30800	75000	48802
0	8297	0	hcd	587.7	23901.7	131.145	23896.1	0	0	0	0	0	0	0	0	0	191.55	23896.1	0											52.42											47602
0	8298	0	hcd	613.79	22189.9	131.144	21911.2	0	0	0	0	0	0	0	0	0	1105.45	21911.2	0										2.45	47.77										53600	47402
0	8301	0	hcd	697.44	15330	131.144	15185.8	0	0	0	0	0	0	0	0	0	384.83	15185.8	0											31.55											47402
0	8302	0	hcd	1119.89	19424.2	176.092	0	0	0	0	0	0	0	0	0	0	0	0	0
0	8303	0	hcd	479.02	106070	131.144	106049	0	0	0	0	0	0	0	0	4733.92	2382.91	106049	0									11.43		247.3									44600		49102
0	8304	0	hcd	361.86	59021.6	131.144	58881.9	0	0	0	0	0	0	0	267.47	4750.78	1549.98	58881.9	0									14.78		170.94									45300		49202
0	8305	0	hcd	598.53	68855.3	131.144	68756.5	0	0	0	0	0	0	0	0	3829.79	1553.67	68756.5	0									8.73		152.63									47500		48902
0	8306	0	hcd	615.79	21123.5	131.144	20948	0	0	0	0	0	0	0	0	0	879.42	20948	0										1.94	44.71										61100	48402
[truncated: 46,047 more rows]

## Sheet: Table_S4
Checked	Confidence	Identifying Node	PSM Ambiguity	Annotated Sequence	Modifications	# Protein Groups	# Proteins	Master Protein Accessions	Protein Accessions	# Missed Cleavages	Charge	DeltaScore	DeltaCn	Rank	Search Engine Rank	m/z [Da]	MH+ [Da]	Theo. MH+ [Da]	DeltaM [ppm]	Deltam/z [Da]	Activation Type	MS Order	Isolation Interference [%]	Average Reporter S/N	Ion Inject Time [ms]	RT [min]	First Scan	Spectrum File	File ID	Abundance: 126	Abundance: 128N	Abundance: 128C	Abundance: 129N	Abundance: 129C	Abundance: 130N	Abundance: 130C	Abundance: 131N	Abundance: 131C	Quan Info	XCorr	Percolator q-Value	Percolator PEP
FALSE	High	Sequest HT (A3)	Unambiguous	[R].aAAAAATAPPsPGPAQPGPR.[A]	N-Term(TMT6plex); S11(Phospho)	1	1	Q6SPF0	Q6SPF0	0	3	0.1048	0	1	1	689.019	2065.04	2065.04	-0.47	-0.00032	HCD (High Energy Collision Dissociation)	MS2	0	337.5	300	80.5319	15091	210716_HEPhos_Max_02.raw	F5	470.2	315.6	297.8	350.5	332.4	323.4	340.5	341.2	265.7		5.25	0	7.316e-07
FALSE	High	Sequest HT (A3)	Unambiguous	[R].aAAAAATAPPsPGPAQPGPR.[A]	N-Term(TMT6plex); S11(Phospho)	1	1	Q6SPF0	Q6SPF0	0	3	0.0595	0	1	1	689.019	2065.04	2065.04	-0.79	-0.00054	HCD (High Energy Collision Dissociation)	MS2	0	355.2	300	80.5628	15213	210716_HEPhos_Max_01.raw	F4	517.7	297.7	338	362.8	327	336.3	352.8	345.1	319.3		5.38	0	1.717e-07
FALSE	High	Sequest HT (A3)	Unambiguous	[R].aAAAAATAPPsPGPAQPGPR.[A]	N-Term(TMT6plex); S11(Phospho)	1	1	Q6SPF0	Q6SPF0	0	3	0.0766	0	1	1	689.018	2065.04	2065.04	-1.82	-0.00125	HCD (High Energy Collision Dissociation)	MS2	0	76.1	35.768	80.5994	20980	210716_HEPhos_Default_02.raw	F2	99	72.5	80.2	77.9	75.6	71.2	66.1	72.1	70.1		4.57	0	7.397e-07
[truncated: 11,969 more rows]

## Sheet: Table_S5
Checked	Confidence	Identifying Node	PSM Ambiguity	Annotated Sequence	Modifications	Number of Protein Groups	Number of Proteins	Master Protein Accessions	Protein Accessions	Number of Missed Cleavages	Charge	Delta Score	Delta Cn	Rank	Search Engine Rank	mz in Da	MHplus in Da	Theo MHplus in Da	Delta M in ppm	Delta mz in Da	Activation Type	MS Order	Isolation Interference in Percent	Average Reporter SN	Ion Inject Time in ms	RT in min	First Scan	Spectrum File	Abundance 126	Abundance 128N	Abundance 128C	Abundance 129N	Abundance 129C	Abundance 130N	Abundance 130C	Abundance 131N	Abundance 131C	Quan Info	XCorr	Percolator q-Value	Percolator PEP
[truncated: 47,747 more rows]

[truncated: 5 more sheets: Table_S6, Table_S7, Table_S8, Table_S9, Table_S10]
